# Supplementary material
Source: publisher site journal article supplement (https://www.spandidos-publications.com/8309/downloadSupplementary)
Supplement: Supplementary file 1 [file downloadSupplementary]

## Sheet: FDR<0.05_and_Upregulated_DEGs
Gene ID	Gene Name	shNC_1	shNC_2	shNC_3	shMAGEA1_1_1	shMAGEA1_1_2	shMAGEA1_1_3	shMAGEA1_2_1	shMAGEA1_2_2	shMAGEA1_2_3	logFC	logCPM	LR	PValue	FDR
ENSG00000205336	ADGRG1	4.03007	3.92445	3.98466	5.81037	5.76986	5.8757	5.92852	5.94713	5.91174	1.89768	5.47237	320.218	1.3e-71	8.58e-68
ENSG00000262406	MMP12	1.15253	0.490955	0.915726	3.69185	3.51766	3.73887	3.72757	3.69668	3.64514	2.82398	3.18751	299.206	4.91e-67	2.16e-63
ENSG00000138772	ANXA3	4.06245	4.03977	3.94903	5.70552	5.72203	5.73656	5.80187	5.78393	5.72825	1.73127	5.36459	291.849	1.97e-65	6.5e-62
ENSG00000146674	IGFBP3	5.39873	5.32888	5.37314	6.83198	6.76633	6.79279	6.86994	6.88649	6.86812	1.4703	6.49114	241.332	2.01e-54	5.33e-51
ENSG00000153162	BMP6	5.74816	5.73524	5.7444	7.16053	7.13377	7.10054	7.14419	7.11438	7.17314	1.39599	6.80408	237.623	1.3e-53	3.12e-50
ENSG00000106366	SERPINE1	2.01986	2.12883	1.96461	4.03508	4.01224	3.91817	4.17078	4.09141	4.21098	2.04613	3.65728	235.056	4.71e-53	1.04e-49
ENSG00000186832	KRT16	-0.823344	-0.549267	0.0100002	2.44384	2.76782	2.78093	3.22012	3.02225	2.96065	3.3666	2.37245	179.641	5.8e-41	6.14e-38
ENSG00000008441	NFIX	-0.616197	-0.828709	-0.0210679	2.24105	2.43287	2.17546	2.16065	2.10357	2.20699	2.74172	1.74897	177.204	1.98e-40	1.94e-37
ENSG00000143320	CRABP2	0.608779	0.316063	0.865649	3.1049	3.12312	2.88811	2.86215	2.72279	2.83413	2.34857	2.48393	164.81	1.01e-37	8.87e-35
ENSG00000172379	ARNT2	0.746458	0.753738	0.585317	2.81586	2.77214	2.65619	3.07026	3.08666	2.82392	2.20934	2.44598	160.464	8.96e-37	7.64e-34
ENSG00000162909	CAPN2	7.85591	7.85378	7.88238	9.09196	9.1094	9.11943	8.95531	8.96849	8.95334	1.17099	8.7393	153.607	2.82e-35	2.26e-32
ENSG00000121578	B4GALT4	3.67596	3.50501	3.50971	4.83405	4.87214	4.84997	4.84655	4.83126	4.75982	1.27028	4.52027	142.347	8.17e-33	5.14e-30
ENSG00000135919	SERPINE2	2.86473	2.56509	2.99234	5.2105	5.10429	5.11069	5.76852	5.81878	5.73847	2.68232	5.01719	141.777	1.09e-32	6.56e-30
ENSG00000064195	DLX3	4.78738	4.84807	4.84526	6.01307	6.04652	6.02277	6.2616	6.20482	6.291	1.31837	5.8234	137.652	8.68e-32	4.99e-29
ENSG00000085563	ABCB1	-2.53559	-1.82494	-1.96516	1.51447	1.74614	1.73963	2.58912	2.44098	2.17522	4.40478	1.54265	136.857	1.3e-31	7.14e-29
ENSG00000187957	DNER	5.11161	5.06758	5.10201	6.10809	6.12725	6.13784	6.20674	6.18869	6.14232	1.05929	5.87775	129.479	5.33e-30	2.61e-27
ENSG00000166226	CCT2	8.09693	8.10679	8.08392	9.03657	9.09025	9.0286	9.09438	9.0799	9.0705	0.971105	8.80974	129.295	5.85e-30	2.81e-27
ENSG00000136826	KLF4	5.06348	5.20884	5.32067	6.30531	6.25559	6.27435	6.35109	6.35827	6.35221	1.11593	6.03137	122.627	1.68e-28	7.06e-26
ENSG00000172818	OVOL1	-2.36376	-3.61362	-2.38269	0.535316	0.692684	0.440229	0.276985	0.862533	0.722953	3.6793	0.0900672	119.702	7.35e-28	2.82e-25
ENSG00000128422	KRT17	3.96304	4.15956	4.10645	7.13523	7.08222	7.12672	8.13778	8.18285	8.17457	3.65787	7.2047	118.947	1.08e-27	4.06e-25
ENSG00000198053	SIRPA	-3.5528	-2.30737	-2.55386	1.0869	0.896618	1.37492	2.11962	1.67124	1.47605	4.59801	0.947637	116.879	3.05e-27	1.11e-24
ENSG00000196754	S100A2	2.68064	2.88792	2.68583	3.97442	3.96956	4.0454	4.16575	4.06136	4.01628	1.2897	3.72473	114.297	1.12e-26	3.8e-24
ENSG00000066629	EML1	3.82107	3.85216	3.91045	5.19159	4.91971	5.05725	5.23782	5.20944	5.34583	1.30691	4.84749	111.623	4.32e-26	1.41e-23
ENSG00000080824	HSP90AA1	8.9197	8.89854	8.85845	9.93706	10.0151	9.91026	10.2666	10.2271	10.2212	1.2112	9.80073	109.768	1.1e-25	3.47e-23
ENSG00000144635	DYNC1LI1	4.78282	4.77281	4.7484	5.71826	5.72426	5.6978	5.71731	5.77006	5.74119	0.961222	5.47337	106.149	6.84e-25	1.95e-22
ENSG00000101928	MOSPD1	4.85637	4.98228	4.90845	5.85335	5.92261	6.00083	5.94476	5.99384	5.85585	1.01402	5.66417	105.426	9.85e-25	2.77e-22
ENSG00000227036	LINC00511	2.09545	2.45858	2.58627	3.91111	3.95441	3.65368	3.84339	3.86464	3.88987	1.4673	3.51186	103.982	2.04e-24	5.56e-22
ENSG00000169991	IFFO2	1.75668	1.31521	1.14294	3.42543	3.33676	3.28958	3.10571	3.09658	3.00199	1.80564	2.8284	101.989	5.58e-24	1.46e-21
ENSG00000130558	OLFM1	-3.5528	-3.61362	-3.56511	-0.168049	0.0331122	-0.0822535	0.588976	0.411577	0.655477	4.7053	-0.265577	100.967	9.35e-24	2.43e-21
ENSG00000223784	LINP1	2.51983	2.59892	2.42273	3.75708	3.93911	3.88788	3.69535	3.70966	3.67384	1.27087	3.46886	97.8014	4.63e-23	1.1e-20
ENSG00000114686	MRPL3	6.74291	6.70226	6.67403	7.53068	7.5849	7.57792	7.56391	7.55769	7.53606	0.852249	7.32649	96.4473	9.17e-23	2.14e-20
ENSG00000108010	GLRX3	6.3417	6.40969	6.35058	7.30721	7.39603	7.35543	7.25963	7.26133	7.18515	0.928491	7.04744	96.3196	9.78e-23	2.24e-20
ENSG00000124225	PMEPA1	5.28549	5.22672	5.32144	6.29967	6.31534	6.3363	6.62321	6.59694	6.6289	1.19685	6.17432	96.3382	9.68e-23	2.24e-20
ENSG00000095739	BAMBI	3.4924	3.34905	3.44012	4.55398	4.49163	4.66921	4.79101	4.82829	4.89273	1.28627	4.39621	96.0563	1.12e-22	2.52e-20
ENSG00000185633	NDUFA4L2	-3.22396	-1.72591	-2.55386	0.875721	0.848273	0.521393	1.00406	1.51247	1.23541	3.68265	0.515471	95.1875	1.73e-22	3.81e-20
ENSG00000134668	SPOCD1	1.85565	1.67371	1.79661	3.16196	3.26798	2.98787	3.46362	3.42761	3.31424	1.51307	2.92895	94.4379	2.53e-22	5.27e-20
ENSG00000141424	SLC39A6	5.64439	5.715	5.64276	6.49799	6.53678	6.55176	6.68281	6.66625	6.70492	0.941555	6.35789	90.3828	1.96e-21	3.76e-19
ENSG00000101132	PFDN4	2.7098	2.29133	2.66646	4.17718	4.2664	4.37652	4.10223	3.82147	3.9568	1.56845	3.76989	89.8347	2.59e-21	4.89e-19
ENSG00000183580	FBXL7	-2.53559	-2.04608	-1.54826	0.732378	1.42208	1.00333	1.92697	1.61717	1.25073	3.58487	0.862525	89.6202	2.89e-21	5.41e-19
ENSG00000204291	COL15A1	3.32034	3.20588	3.20529	4.16792	4.33086	4.27192	4.29575	4.31872	4.28169	1.03712	4.0091	88.8843	4.19e-21	7.59e-19
ENSG00000140297	GCNT3	0.1512	0.551435	0.625994	2.44384	2.33686	2.3299	1.98142	2.0365	2.19119	1.80062	1.84309	87.8476	7.07e-21	1.26e-18
ENSG00000124787	RPP40	3.41484	3.30874	3.38193	4.52164	4.60508	4.64904	4.44714	4.31307	4.41857	1.13114	4.20941	86.9421	1.12e-20	1.98e-18
ENSG00000124466	LYPD3	6.62287	6.62521	6.6849	7.53654	7.46545	7.54993	7.39831	7.48472	7.46209	0.839395	7.25435	86.3978	1.47e-20	2.59e-18
ENSG00000115368	WDR75	4.83116	4.80525	4.90122	5.72301	5.6714	5.6885	5.75016	5.78291	5.71104	0.876191	5.4845	84.8652	3.19e-20	5.48e-18
ENSG00000130881	LRP3	3.37899	3.34621	3.47394	4.59254	4.43546	4.4353	4.39078	4.3453	4.38945	1.03606	4.16428	83.8358	5.38e-20	9.11e-18
ENSG00000067141	NEO1	0.337076	0.571044	0.362712	3.04885	2.75913	2.88043	3.85386	3.82941	3.98685	3.0883	2.9775	83.0995	7.8e-20	1.31e-17
ENSG00000235162	C12orf75	-3.5528	-2.62667	-2.55386	0.165358	0.674313	0.757481	1.52767	1.49259	1.325	4.35454	0.53068	82.9471	8.43e-20	1.4e-17
ENSG00000131019	ULBP3	1.85565	1.96062	2.1222	3.15885	3.33676	3.11752	3.50669	3.31041	3.35025	1.32675	2.98106	82.9014	8.63e-20	1.43e-17
ENSG00000163811	WDR43	6.05503	6.03173	6.03989	6.83223	6.86353	6.80879	6.98554	7.00065	6.94372	0.86577	6.67258	81.5958	1.67e-19	2.61e-17
ENSG00000123977	DAW1	-0.823344	-0.935334	-0.457851	1.71421	1.51792	1.64319	1.11955	1.19333	1.25073	2.22805	0.997659	81.486	1.77e-19	2.75e-17
ENSG00000198843	SELENOT	5.44859	5.4087	5.32454	6.37434	6.3146	6.49543	6.28343	6.24251	6.21394	0.929695	6.07532	79.7334	4.28e-19	6.47e-17
ENSG00000117899	MESD	5.76967	5.74929	5.76105	6.55532	6.51016	6.56976	6.55335	6.53359	6.58234	0.791336	6.33223	79.4788	4.87e-19	7.32e-17
ENSG00000155438	NIFK	3.91169	3.73101	3.82349	4.75383	4.70461	4.70005	4.83498	4.80933	4.75176	0.938268	4.51001	78.8902	6.57e-19	9.7e-17
ENSG00000132475	H3-3B	8.36244	8.34947	8.37196	9.24303	9.26951	9.32218	9.09405	9.12247	9.1401	0.839781	8.9715	78.3383	8.68e-19	1.28e-16
ENSG00000173692	PSMD1	6.82819	6.84525	6.83531	7.62163	7.72592	7.55114	7.84656	7.80456	7.73457	0.881505	7.47908	76.5426	2.16e-18	3.08e-16
ENSG00000198915	RASGEF1A	1.58897	1.31521	2.15732	3.21685	3.29529	3.36848	3.2394	3.24359	3.2317	1.54895	2.91173	76.0068	2.83e-18	4.02e-16
ENSG00000110321	EIF4G2	8.2931	8.28683	8.33439	9.15046	9.19288	9.05034	9.39348	9.39889	9.36423	0.959723	9.0097	75.8245	3.1e-18	4.36e-16
ENSG00000138944	SHISAL1	5.93105	5.92673	5.96705	6.73294	6.75654	6.65513	6.72445	6.7798	6.6927	0.782876	6.50737	75.4302	3.79e-18	5.3e-16
ENSG00000113621	TXNDC15	5.55885	5.45627	5.37612	6.38203	6.37841	6.38456	6.26513	6.24437	6.24248	0.852689	6.08553	73.6025	9.55e-18	1.3e-15
ENSG00000143061	IGSF3	6.85943	6.87588	6.85523	7.62572	7.61907	7.55837	7.58353	7.5927	7.61718	0.736257	7.39338	73.5472	9.83e-18	1.33e-15
ENSG00000092850	TEKT2	-1.20342	-2.62667	-1.74171	1.13836	1.0892	1.29638	2.06303	2.0637	2.20699	3.65727	1.19378	73.4577	1.03e-17	1.38e-15
ENSG00000165914	TTC7B	-0.522805	-0.178004	-0.1185	1.32759	1.58829	1.42851	1.49596	1.57997	1.96834	1.88619	1.18004	73.1596	1.2e-17	1.58e-15
ENSG00000143641	GALNT2	8.80996	8.81099	8.79708	9.65233	9.63567	9.60427	9.4772	9.53112	9.52351	0.766136	9.35899	73.0059	1.29e-17	1.7e-15
ENSG00000102172	SMS	7.66381	7.61682	7.6502	8.31176	8.40745	8.36043	8.45396	8.40585	8.40024	0.746989	8.18189	72.9485	1.33e-17	1.74e-15
ENSG00000142552	RCN3	3.94067	3.87008	3.91251	4.98662	4.78921	4.88777	4.72758	4.76858	4.94548	0.947772	4.60198	72.7511	1.47e-17	1.92e-15
ENSG00000001617	SEMA3F	6.54209	6.64327	6.60957	7.36489	7.31682	7.32767	7.3312	7.36082	7.33913	0.741469	7.13276	72.1538	1.99e-17	2.57e-15
ENSG00000100558	PLEK2	1.91528	1.99005	1.94866	3.45364	3.37707	3.43807	4.01169	3.99755	4.13664	1.82827	3.37584	72.1254	2.02e-17	2.59e-15
ENSG00000109099	PMP22	6.93981	6.93501	6.93858	7.7129	7.73343	7.72919	7.98197	7.95947	7.98744	0.918586	7.60987	71.983	2.17e-17	2.77e-15
ENSG00000189337	KAZN	-2.95634	-3.03734	-2.97263	0.165358	0.476465	-0.274392	0.942656	0.995622	1.23541	4.16379	0.141059	70.8816	3.79e-17	4.75e-15
ENSG00000129521	EGLN3	3.4613	3.29702	3.5446	4.43298	4.45443	4.39414	4.45678	4.26699	4.36149	0.961095	4.14152	70.602	4.37e-17	5.45e-15
ENSG00000182985	CADM1	-1.35618	-1.63324	-0.457851	2.22329	1.94314	2.13735	3.2772	3.23464	3.45318	4.0144	2.2994	70.5374	4.52e-17	5.61e-15
ENSG00000224411	HSP90AA2P	2.89042	2.91119	2.82772	3.91849	4.02317	3.91817	4.42486	4.15919	4.27233	1.25845	3.82085	70.4334	4.76e-17	5.88e-15
ENSG00000184203	PPP1R2	4.92842	4.84405	4.85063	5.7491	5.65803	6.04224	5.7997	5.76851	5.95272	0.96027	5.57945	68.6187	1.19e-16	1.42e-14
ENSG00000213080	ENSG00000213080	5.85098	5.8334	5.78875	6.51664	6.57998	6.54753	6.58635	6.59549	6.53032	0.735496	6.3537	67.6687	1.93e-16	2.24e-14
ENSG00000163110	PDLIM5	6.13064	6.19031	6.15815	6.89528	6.97186	6.98143	7.20796	7.23614	7.21329	0.931235	6.8419	67.0962	2.59e-16	2.97e-14
ENSG00000115539	PDCL3	4.07184	3.99692	4.12962	5.54438	5.56947	5.49359	5.10311	5.12075	5.05863	1.26733	5.02013	66.7478	3.09e-16	3.5e-14
ENSG00000113504	SLC12A7	1.97253	1.75311	1.77868	3.0919	3.25258	3.08117	3.66715	3.65257	3.66815	1.59853	3.06279	66.466	3.56e-16	4.01e-14
ENSG00000163235	TGFA	0.45656	1.06162	1.01095	2.24105	2.14341	2.45913	2.51195	2.64387	2.58492	1.59175	2.08078	65.9242	4.69e-16	5.21e-14
ENSG00000149328	GLB1L2	-0.616197	-0.113978	-0.152497	2.18709	2.04674	1.95945	2.9738	3.18595	3.17661	3.02016	2.18678	65.7944	5.01e-16	5.48e-14
ENSG00000115053	NCL	9.5031	9.48735	9.49253	10.2002	10.2711	10.1848	10.488	10.4279	10.4274	0.843834	10.1077	65.7498	5.12e-16	5.57e-14
ENSG00000254510	ENSG00000254510	-4.58787	-2.62667	-2.55386	-0.168049	-0.0257415	-0.0822535	-0.411221	-0.585676	-0.423702	3.19169	-0.74187	65.6681	5.34e-16	5.78e-14
ENSG00000109814	UGDH	4.92635	4.871	4.83878	5.6176	5.69438	5.62679	5.59791	5.69048	5.62913	0.76488	5.43058	65.5502	5.67e-16	6.09e-14
ENSG00000164305	CASP3	3.47552	3.42645	3.47394	4.23298	4.30721	4.26899	4.38502	4.36593	4.40665	0.872391	4.09297	65.1392	6.98e-16	7.41e-14
ENSG00000150054	MPP7	4.15722	4.16763	4.08655	4.8886	4.96008	4.86851	5.01356	5.01844	5.00542	0.823895	4.73456	64.9678	7.61e-16	8.02e-14
ENSG00000026508	CD44	8.39525	8.41748	8.43073	9.43784	9.50318	9.46983	9.19799	9.18037	9.16552	0.918713	9.0868	64.9447	7.7e-16	8.08e-14
ENSG00000076864	RAP1GAP	4.12151	4.27615	4.31519	5.55033	5.47445	5.49923	5.14631	5.11669	5.22302	1.10755	5.06245	64.3908	1.02e-15	1.05e-13
ENSG00000138678	GPAT3	2.05057	2.04718	2.18481	4.1111	4.06783	3.82931	3.44159	3.44582	3.3992	1.66154	3.37656	64.2202	1.11e-15	1.14e-13
ENSG00000187676	B3GLCT	3.57394	3.57466	3.67147	4.38851	4.38552	4.56778	4.57658	4.63552	4.59552	0.922918	4.28145	64.1364	1.16e-15	1.18e-13
ENSG00000149131	SERPING1	-1.0653	-0.178004	-0.457851	1.0061	1.45474	1.26137	1.32602	1.20559	1.13989	1.81344	0.854826	64.1089	1.18e-15	1.19e-13
ENSG00000159399	HK2	4.96213	4.89648	5.00992	5.7671	5.64039	5.69671	5.75352	5.76903	5.69783	0.765515	5.50878	63.7049	1.45e-15	1.44e-13
ENSG00000134247	PTGFRN	7.39168	7.41138	7.43081	8.0909	8.08255	8.04821	8.10925	8.10979	8.08697	0.67683	7.89578	63.6425	1.49e-15	1.48e-13
ENSG00000091164	TXNL1	5.63112	5.57574	5.57621	6.58373	6.64687	6.57066	6.37997	6.33891	6.33344	0.887369	6.24169	63.0864	1.98e-15	1.96e-13
ENSG00000149257	SERPINH1	8.86317	8.86188	8.86503	9.51326	9.47032	9.56484	9.53705	9.53268	9.54779	0.664649	9.33854	62.6007	2.53e-15	2.5e-13
ENSG00000110218	PANX1	4.6183	4.54513	4.6259	5.30642	5.38761	5.32508	5.39724	5.5162	5.41886	0.797668	5.17355	62.5389	2.61e-15	2.56e-13
ENSG00000138279	ANXA7	5.77082	5.78646	5.67159	6.4612	6.48436	6.42368	6.47045	6.43189	6.46408	0.712599	6.25541	62.2006	3.1e-15	3e-13
ENSG00000157703	SVOPL	0.233809	0.268815	0.543459	1.82828	1.8643	1.56877	1.94273	2.10357	2.23036	1.61063	1.57438	61.9708	3.49e-15	3.34e-13
ENSG00000230479	LNCTSI	-2.36376	-2.17082	-2.55386	-0.265005	0.538719	0.376211	0.373216	0.432598	-0.28467	2.85847	-0.228464	61.9487	3.53e-15	3.37e-13
ENSG00000142156	COL6A1	-0.352409	-1.1756	-0.222992	1.73107	2.03239	2.00249	2.85384	2.93655	3.11095	3.14423	2.03659	61.9099	3.6e-15	3.42e-13
ENSG00000151348	EXT2	6.01179	5.98727	5.97544	6.70628	6.80958	6.64045	6.65944	6.72174	6.72013	0.719387	6.50834	61.4775	4.48e-15	4.18e-13
ENSG00000050405	LIMA1	6.87157	6.9248	6.91749	7.64114	7.66326	7.56242	7.91323	7.82272	7.83218	0.839824	7.51497	60.8255	6.24e-15	5.73e-13
ENSG00000156510	HKDC1	0.90612	0.93113	0.543459	2.13737	2.24648	2.34112	2.72298	2.88791	2.7341	1.7561	2.15531	60.8172	6.26e-15	5.73e-13
ENSG00000161243	FBXO27	0.0933756	0.0346602	-0.29711	1.63581	1.68322	1.93744	1.88677	1.16848	1.82215	1.79677	1.32387	60.7926	6.34e-15	5.78e-13
ENSG00000144959	NCEH1	4.75278	4.69452	4.85277	5.65562	5.68006	5.61413	5.52122	5.49199	5.48271	0.809459	5.35394	60.6576	6.79e-15	6.09e-13
ENSG00000104613	INTS10	6.98051	6.99748	7.01308	7.68951	7.72076	7.70632	7.66153	7.61557	7.63736	0.675422	7.48037	60.4108	7.7e-15	6.85e-13
ENSG00000167721	TSR1	7.40901	7.40645	7.34432	8.10249	8.09663	8.0273	8.02646	8.046	8.04241	0.670444	7.86643	60.3884	7.79e-15	6.91e-13
ENSG00000128294	TPST2	3.42952	3.48705	3.50426	4.4083	4.41625	4.48167	4.28651	4.23893	4.27045	0.881732	4.11531	60.3091	8.11e-15	7.12e-13
ENSG00000113712	CSNK1A1	5.28387	5.30785	5.23451	5.95102	6.02991	5.92408	6.10443	6.09867	6.07343	0.756669	5.82108	60.1316	8.87e-15	7.77e-13
ENSG00000025708	TYMP	5.84879	5.84703	5.83177	6.55679	6.44427	6.57482	6.57343	6.57672	6.6572	0.722948	6.36207	59.9026	9.97e-15	8.67e-13
ENSG00000085415	SEH1L	4.60672	4.58666	4.60061	5.3225	5.33083	5.36755	5.32913	5.32497	5.2764	0.728539	5.1213	59.8804	1.01e-14	8.74e-13
ENSG00000003096	KLHL13	4.81895	4.95828	4.79597	5.8232	5.84877	5.86554	6.3133	6.32	6.36062	1.25036	5.79933	59.8155	1.04e-14	9e-13
ENSG00000197170	PSMD12	6.1071	6.13292	6.05626	6.76552	6.89783	6.83854	7.11904	7.10275	7.00854	0.862562	6.72696	59.4467	1.26e-14	1.08e-12
ENSG00000109534	GAR1	4.89918	4.99957	4.83553	5.8168	5.79823	5.93616	5.71902	5.58588	5.70896	0.852687	5.53281	59.322	1.34e-14	1.14e-12
ENSG00000171310	CHST11	2.39973	2.30311	2.23826	3.33183	3.45985	3.28377	3.84129	3.54084	3.66243	1.2234	3.22848	59.2034	1.42e-14	1.21e-12
ENSG00000236814	ENSG00000236814	3.57922	3.57951	3.63457	4.47861	4.45443	4.44052	4.29882	4.37953	4.41517	0.816521	4.18854	59.1406	1.47e-14	1.24e-12
ENSG00000169299	PGM2	4.11425	3.91105	3.7836	4.82426	4.81355	4.76503	5.09167	5.01844	5.02003	0.986511	4.66753	59.0211	1.56e-14	1.31e-12
ENSG00000168502	MTCL1	5.87638	5.92101	5.94813	6.70921	6.75271	6.67273	6.53754	6.61401	6.60189	0.734743	6.44399	58.9842	1.59e-14	1.33e-12
ENSG00000105185	PDCD5	5.72276	5.74391	5.63469	6.45709	6.38584	6.38726	6.6229	6.60449	6.64855	0.821017	6.29657	58.8904	1.67e-14	1.39e-12
ENSG00000136888	ATP6V1G1	5.96217	5.98408	6.01474	6.92421	7.00738	7.09971	6.7344	6.73052	6.74773	0.894758	6.64021	58.6086	1.92e-14	1.59e-12
ENSG00000134987	WDR36	5.05499	5.20728	5.13321	5.82615	5.80933	5.84991	5.9151	5.87121	5.8677	0.724246	5.65359	58.466	2.07e-14	1.7e-12
ENSG00000103381	CPPED1	4.37611	4.24292	4.35203	5.10613	5.05455	5.04615	5.27489	5.15593	5.12041	0.804925	4.90688	58.4169	2.12e-14	1.74e-12
ENSG00000183826	BTBD9	-0.616197	-1.46405	-1.37772	0.698493	1.01814	0.822981	1.54843	1.30013	1.4364	2.37454	0.725024	58.3477	2.2e-14	1.79e-12
ENSG00000122547	EEPD1	-0.616197	-0.828709	-0.222992	1.32759	0.973758	1.35291	1.7942	1.87695	1.82215	2.16034	1.13433	58.1463	2.43e-14	1.97e-12
ENSG00000125870	SNRPB2	4.6773	4.52893	4.61457	5.3384	5.45777	5.3812	5.44438	5.26544	5.36091	0.769025	5.16262	57.3666	3.62e-14	2.9e-12
ENSG00000171798	KNDC1	-0.522805	-0.991756	-0.29711	1.18805	0.746433	1.05876	1.03381	1.06458	1.00182	1.66212	0.659109	57.2871	3.77e-14	3.01e-12
ENSG00000221955	SLC12A8	2.0353	1.94567	1.66616	3.43832	3.36281	3.39564	4.10748	4.16862	4.27982	1.96617	3.43523	57.2544	3.83e-14	3.05e-12
ENSG00000134061	CD180	-1.94493	-2.04608	-3.56511	0.00826462	0.0331122	-0.0235017	0.704469	0.715907	0.584689	3.00105	-0.106344	56.9873	4.39e-14	3.46e-12
ENSG00000074370	ATP2A3	3.77123	3.57466	3.46556	5.0058	4.96576	4.9587	4.53298	4.57181	4.6015	1.18098	4.49076	56.9635	4.44e-14	3.49e-12
ENSG00000117525	F3	4.50921	4.49725	4.44021	5.48163	5.39815	5.45537	5.24579	5.19183	5.21132	0.854366	5.10326	56.8739	4.65e-14	3.64e-12
ENSG00000117133	RPF1	5.62603	5.58541	5.66855	6.35577	6.43031	6.34852	6.35699	6.24696	6.27844	0.710866	6.13716	56.833	4.74e-14	3.7e-12
ENSG00000173421	IHO1	-1.20342	-0.828709	-0.73852	1.11286	1.06119	1.4494	2.08451	2.16767	2.2685	2.77495	1.29373	56.374	5.99e-14	4.65e-12
ENSG00000136819	C9orf78	5.46293	5.43569	5.49687	6.28333	6.30493	6.27764	6.21528	6.06204	6.13975	0.751693	6.00679	56.2118	6.51e-14	5e-12
ENSG00000139921	TMX1	4.26264	4.28805	4.16456	4.97252	4.8981	5.06065	5.05042	5.10119	4.99181	0.775811	4.79902	56.15	6.71e-14	5.15e-12
ENSG00000120254	MTHFD1L	6.5837	6.58268	6.61684	7.34449	7.43184	7.31812	7.21244	7.23278	7.25401	0.706699	7.1016	56.0791	6.96e-14	5.32e-12
ENSG00000106799	TGFBR1	7.16944	7.11652	7.07338	7.89012	7.91002	8.07124	8.37807	8.37945	8.31238	1.05171	7.89865	56.0645	7.01e-14	5.34e-12
ENSG00000039139	DNAH5	0.783497	0.961165	0.741567	2.11185	2.37717	1.83002	2.14028	2.1231	2.06685	1.30267	1.80201	55.5542	9.09e-14	6.91e-12
ENSG00000136159	NUDT15	4.56611	4.65601	4.63714	5.30501	5.28994	5.30445	5.37125	5.34521	5.36708	0.711237	5.13055	55.5218	9.24e-14	7e-12
ENSG00000106554	CHCHD3	5.84551	5.84401	5.83285	6.49027	6.53073	6.53476	6.46841	6.45101	6.53424	0.661472	6.31337	55.1213	1.13e-13	8.51e-12
ENSG00000150687	PRSS23	9.16129	9.12581	9.1321	9.76475	9.73571	9.72045	9.75342	9.81822	9.78016	0.622683	9.58321	54.8979	1.27e-13	9.48e-12
ENSG00000175348	TMEM9B	5.23457	5.29759	5.30588	5.8904	5.99749	6.09871	5.98292	5.98409	5.97308	0.709907	5.78906	54.8824	1.28e-13	9.51e-12
ENSG00000133816	MICAL2	4.99111	4.9129	4.99252	5.69482	5.65334	5.57901	5.76187	5.73664	5.65815	0.716718	5.48035	54.2815	1.74e-13	1.27e-11
ENSG00000120800	UTP20	6.18961	6.19703	6.24966	7.07996	7.09782	6.92125	7.42855	7.44599	7.4397	1.03862	6.98001	54.0566	1.95e-13	1.41e-11
ENSG00000168036	CTNNB1	8.01669	7.99702	8.02335	8.64307	8.65252	8.65855	8.87541	8.89365	8.89427	0.762101	8.56223	53.3682	2.77e-13	1.97e-11
ENSG00000113312	TTC1	5.0896	5.04935	5.0692	5.7335	5.75791	5.6841	5.81478	5.72071	5.80421	0.684317	5.55925	53.1913	3.03e-13	2.13e-11
ENSG00000080371	RAB21	4.91387	4.87593	4.88769	5.4965	5.55197	5.66748	5.68016	5.61318	5.59952	0.711015	5.40263	53.1811	3.04e-13	2.14e-11
ENSG00000107130	NCS1	6.97476	7.06473	7.03943	7.79999	7.76497	7.81759	7.57217	7.70495	7.66765	0.697046	7.52659	52.286	4.8e-13	3.33e-11
ENSG00000137055	PLAA	5.52166	5.56722	5.48517	6.21794	6.26521	6.12816	6.49104	6.40854	6.37861	0.795431	6.10047	52.0818	5.32e-13	3.66e-11
ENSG00000006451	RALA	3.39404	3.42375	3.50971	4.30371	4.2244	4.28941	4.53168	4.17175	4.32576	0.871113	4.07646	51.9681	5.64e-13	3.86e-11
ENSG00000167460	TPM4	1.27463	1.61824	1.45661	2.63062	2.55337	2.74758	2.50135	2.67066	2.3275	1.13299	2.29327	51.9228	5.77e-13	3.93e-11
ENSG00000175606	TMEM70	4.57142	4.58304	4.46003	5.27802	5.24319	5.32861	5.25687	5.21703	5.17263	0.712059	5.0499	51.9163	5.79e-13	3.94e-11
ENSG00000136999	CCN3	2.40569	2.1222	2.11508	3.29546	3.24015	3.24845	3.7389	3.68797	3.7513	1.29859	3.19513	51.6146	6.75e-13	4.54e-11
ENSG00000126217	MCF2L	1.33824	1.64624	0.813772	2.91878	2.53821	2.82955	3.31404	3.24656	3.42644	1.78626	2.68914	51.6046	6.79e-13	4.56e-11
ENSG00000069345	DNAJA2	6.10069	6.14728	6.12705	6.72112	6.69209	6.83135	6.88965	6.8037	6.84685	0.674213	6.60745	51.3006	7.93e-13	5.29e-11
ENSG00000198576	ARC	-3.5528	-3.03734	-4.58787	-0.782115	-0.703213	-0.758199	-0.581195	-0.971011	-1.5426	3.52881	-1.32313	51.2204	8.26e-13	5.49e-11
ENSG00000181191	PJA1	-0.716056	-0.549267	-0.222992	1.11286	1.45474	1.68783	2.37339	2.31078	2.41171	2.5213	1.51227	50.689	1.08e-12	7.15e-11
ENSG00000086061	DNAJA1	8.11952	8.12141	8.1088	8.76715	8.76856	8.78103	9.09851	9.05285	9.03692	0.808417	8.70232	50.5648	1.15e-12	7.55e-11
ENSG00000155304	HSPA13	3.67349	3.63646	3.71219	4.33713	4.37418	4.5192	4.41641	4.44952	4.41347	0.747041	4.21123	50.1287	1.44e-12	9.24e-11
ENSG00000173145	NOC3L	4.12692	4.21359	4.27099	4.85631	4.95057	4.8617	5.02749	4.98503	4.92174	0.731192	4.73032	50.0339	1.51e-12	9.68e-11
ENSG00000241506	PSMC1P1	5.88759	5.68551	5.73978	6.48221	6.53519	6.42137	6.43187	6.39688	6.43587	0.678295	6.25873	49.8753	1.64e-12	1.04e-10
ENSG00000140416	TPM1	5.53393	5.44435	5.58461	6.30742	6.21763	6.21269	6.19238	6.1755	6.10011	0.680848	6.00919	49.8039	1.7e-12	1.08e-10
ENSG00000113763	UNC5A	-0.129478	-0.178004	-0.73852	1.34959	1.31943	1.37492	2.15389	2.19868	2.02291	2.16686	1.36095	49.4864	2e-12	1.26e-10
ENSG00000120526	NUDCD1	4.09964	4.18365	4.10465	4.84861	4.81459	4.7619	4.89497	4.82134	4.82908	0.700143	4.63139	49.4834	2e-12	1.26e-10
ENSG00000083312	TNPO1	7.1347	7.20292	7.08072	7.71476	7.7391	7.78406	7.95428	7.93609	7.90586	0.702011	7.64394	49.2088	2.3e-12	1.45e-10
ENSG00000096384	HSP90AB1	11.6507	11.6664	11.6493	12.3236	12.3661	12.2904	12.222	12.2201	12.1923	0.61496	12.0931	49.0891	2.45e-12	1.53e-10
ENSG00000139842	CUL4A	8.34445	8.33655	8.34261	8.8887	8.94672	8.88623	9.0339	9.04807	9.03561	0.633684	8.79291	49.0083	2.55e-12	1.59e-10
ENSG00000156642	NPTN	6.46937	6.4749	6.43026	7.007	7.05231	7.17886	7.07433	7.12269	7.09915	0.631971	6.9086	48.842	2.77e-12	1.72e-10
ENSG00000041357	PSMA4	6.87881	6.74739	6.77102	7.35541	7.43577	7.3913	7.539	7.48613	7.51183	0.654662	7.26771	48.6927	2.99e-12	1.85e-10
ENSG00000173530	TNFRSF10D	-2.21024	-3.03734	-1.96516	0.394269	0.343266	0.0329509	1.64797	1.38885	1.46296	3.64435	0.490767	48.6591	3.05e-12	1.87e-10
ENSG00000165119	HNRNPK	7.61343	7.6252	7.64186	8.26088	8.29613	8.23726	8.22861	8.15367	8.20733	0.604547	8.05656	48.5411	3.23e-12	1.98e-10
ENSG00000118495	PLAGL1	5.44209	5.49656	5.50575	6.06677	6.07656	6.10859	6.18784	6.22303	6.2506	0.672567	5.96274	48.2608	3.73e-12	2.27e-10
ENSG00000117505	DR1	5.96369	5.93384	5.88406	6.50566	6.51081	6.80221	6.65436	6.71613	6.70839	0.726438	6.44975	48.0456	4.16e-12	2.51e-10
ENSG00000163083	INHBB	-4.58787	-4.58787	-4.58787	-2.09286	-1.80092	-1.49139	-1.41162	-2.07815	-1.5426	6.67254	-2.20313	48.0518	4.15e-12	2.51e-10
ENSG00000116717	GADD45A	3.53917	3.613	3.50153	4.87539	4.75465	4.77644	4.41076	4.43267	4.32214	1.06195	4.33685	47.9734	4.32e-12	2.59e-10
ENSG00000135750	KCNK1	5.14312	5.02022	5.2004	5.82222	5.76335	5.77379	5.74511	5.79412	5.78395	0.658214	5.59295	47.9641	4.34e-12	2.6e-10
ENSG00000136273	HUS1	4.32206	4.28508	4.37309	5.08498	5.2093	5.05043	4.96517	4.97611	5.02338	0.727985	4.8499	47.9579	4.35e-12	2.6e-10
ENSG00000181610	MRPS23	6.42354	6.45855	6.31837	7.30792	7.29669	7.31171	7.05881	7.01161	7.05755	0.779059	6.96417	47.915	4.45e-12	2.65e-10
ENSG00000249628	LINC00942	1.90691	1.8843	2.19836	2.85868	2.99575	3.00913	2.858	2.94389	3.11515	0.968923	2.71053	47.7688	4.8e-12	2.85e-10
ENSG00000118600	RXYLT1	1.68997	1.77863	1.72351	2.67921	2.90413	2.5682	2.75905	2.61198	2.94661	1.02712	2.48404	47.5281	5.42e-12	3.2e-10
ENSG00000127824	TUBA4A	8.01085	8.04733	8.01069	9.3128	9.32595	9.37585	8.82764	8.85938	8.82094	1.0861	8.82923	47.2589	6.22e-12	3.65e-10
ENSG00000183876	ARSI	0.179265	0.406158	-0.73852	1.85928	1.7809	1.61573	1.54843	1.38885	1.89222	1.69916	1.31787	47.0892	6.78e-12	3.96e-10
ENSG00000279821	ENSG00000279821	1.03458	0.85319	1.33919	2.82767	2.75476	2.82556	2.22654	2.28789	2.29091	1.49017	2.21678	46.9896	7.14e-12	4.15e-10
ENSG00000150753	CCT5	10.4172	10.4158	10.4047	11.003	11.0114	10.9991	10.9835	10.93	10.9545	0.567985	10.8149	46.9665	7.22e-12	4.19e-10
ENSG00000171763	AFG2B	4.54739	4.61528	4.60697	5.31343	5.17622	5.19892	5.26316	5.34451	5.30604	0.678898	5.07571	46.9369	7.33e-12	4.24e-10
ENSG00000141179	PCTP	3.60531	3.60826	3.68598	4.43298	4.50208	4.44573	4.39937	4.23444	4.33298	0.762245	4.1822	46.7146	8.21e-12	4.73e-10
ENSG00000147274	RBMX	8.32122	8.33834	8.32216	8.84744	8.91767	8.92409	9.09416	9.08577	9.08159	0.667914	8.80492	46.6152	8.64e-12	4.96e-10
ENSG00000155760	FZD7	1.44613	1.47986	1.55469	2.67486	2.31331	2.57772	2.99286	2.62116	2.80847	1.19581	2.38112	46.4371	9.46e-12	5.39e-10
ENSG00000142669	SH3BGRL3	5.56817	5.60754	5.63032	6.23355	6.23419	6.23917	6.15311	6.29115	6.1888	0.622209	6.04498	46.3564	9.86e-12	5.61e-10
ENSG00000153214	TMEM87B	3.236	3.17418	3.21199	3.94402	3.88821	3.99478	4.23622	4.06136	4.02967	0.824991	3.80429	46.2238	1.05e-11	5.94e-10
ENSG00000164134	NAA15	5.10523	5.15626	5.09659	5.77016	5.88167	5.72215	6.12185	6.0867	5.99769	0.818852	5.71308	45.9634	1.2e-11	6.72e-10
ENSG00000146731	CCT6A	8.33131	8.3318	8.29926	8.88993	8.93393	8.94222	9.2003	9.19625	9.17383	0.741581	8.8549	45.9311	1.22e-11	6.82e-10
ENSG00000077238	IL4R	4.48833	4.49725	4.39973	5.18319	5.2005	5.31658	5.66301	5.63034	5.35649	0.943207	5.15326	45.6768	1.39e-11	7.75e-10
ENSG00000087253	LPCAT2	2.49213	2.23713	2.46258	3.13688	3.41905	3.25736	3.26784	3.25838	3.2698	0.874504	3.03477	45.3734	1.63e-11	8.94e-10
ENSG00000143499	SMYD2	5.4615	5.36232	5.33454	5.97952	5.96668	6.00348	6.01264	6.07212	6.09216	0.635106	5.83964	45.3719	1.63e-11	8.94e-10
ENSG00000113272	THG1L	4.0454	3.94526	4.11362	4.91004	4.86406	4.71307	4.74342	4.74251	4.66436	0.741024	4.56871	45.2917	1.7e-11	9.26e-10
ENSG00000177614	PGBD5	4.05111	4.01493	4.03084	4.99013	4.91189	4.93297	5.50935	5.54423	5.52507	1.23425	4.95805	45.2249	1.76e-11	9.56e-10
ENSG00000205339	IPO7	7.82821	7.86176	7.86363	8.45793	8.54825	8.48303	8.84394	8.82786	8.81966	0.822116	8.44768	45.0606	1.91e-11	1.03e-09
ENSG00000066248	NGEF	2.69529	2.75708	2.80133	3.63252	3.50212	3.62871	3.4164	3.57433	3.50841	0.797838	3.32674	44.9987	1.97e-11	1.06e-09
ENSG00000136379	ABHD17C	4.4384	4.6468	4.51386	5.24319	5.29971	5.29582	5.60907	5.71857	5.62105	0.942169	5.2258	44.7814	2.2e-11	1.18e-09
ENSG00000091317	CMTM6	3.09947	2.98248	3.0681	3.71321	3.77854	3.99655	4.14885	4.07312	4.01852	0.915407	3.71803	44.7719	2.21e-11	1.19e-09
ENSG00000169714	CNBP	7.68109	7.6271	7.64031	8.18175	8.21931	8.18333	8.36423	8.32936	8.28996	0.613477	8.0861	44.5651	2.46e-11	1.31e-09
ENSG00000169184	MN1	5.70296	5.67931	5.71936	6.63109	6.55729	6.50107	6.22176	6.39889	6.36327	0.751739	6.24215	44.5136	2.53e-11	1.34e-09
ENSG00000026025	VIM	8.96266	8.96194	8.93582	9.52742	9.54509	9.51109	9.75885	9.8026	9.77214	0.704872	9.45939	44.3769	2.71e-11	1.43e-09
ENSG00000164300	SERINC5	0.819608	0.946226	0.882535	1.91935	1.71951	1.87704	1.88677	1.94436	1.93078	1.01212	1.61944	44.134	3.07e-11	1.6e-09
ENSG00000171403	KRT9	-4.58787	-3.61362	-3.56511	-1.22686	-0.362513	-0.711076	-1.77441	-0.864608	-0.749845	4.03528	-1.37647	44.1142	3.1e-11	1.61e-09
ENSG00000188511	MIR3667HG	-1.94493	-2.62667	-2.22969	0.351301	0.0331122	0.00500069	1.53809	1.45198	0.828841	3.34452	0.33553	43.7636	3.71e-11	1.91e-09
ENSG00000265728	ENSG00000265728	-3.97944	-3.2969	-3.23867	-0.333463	-0.565855	-1.66014	-0.333198	-0.120069	0.198811	3.82515	-0.882265	43.7405	3.75e-11	1.93e-09
ENSG00000213740	SERBP1P1	5.69083	5.77436	5.7046	6.31372	6.39393	6.26886	6.52188	6.3538	6.52284	0.675553	6.20709	43.6274	3.97e-11	2.03e-09
ENSG00000197747	S100A10	8.05258	8.09572	8.11941	8.69944	8.67716	8.58198	8.84787	8.8747	8.85823	0.67127	8.56971	43.6154	4e-11	2.04e-09
ENSG00000136527	TRA2B	7.73142	7.73684	7.68341	8.35624	8.31014	8.43875	8.27859	8.25599	8.25037	0.599229	8.1431	43.5304	4.17e-11	2.12e-09
ENSG00000176692	FOXC2	1.90691	1.93057	1.49005	2.6705	2.72829	3.06434	3.05221	3.16097	3.26226	1.22397	2.70139	43.5177	4.2e-11	2.13e-09
ENSG00000164983	TMEM65	3.91586	3.63878	3.62958	4.45344	4.36132	4.60782	4.59666	4.56707	4.53579	0.790756	4.30478	43.4514	4.35e-11	2.19e-09
ENSG00000160886	LY6K	7.78819	7.77287	7.83789	8.82012	8.67211	8.80497	8.40171	8.42507	8.49879	0.814192	8.39011	43.3331	4.62e-11	2.32e-09
ENSG00000153989	NUS1	5.09421	4.9777	4.97097	5.52457	5.65217	5.66636	5.72131	5.72231	5.71588	0.653919	5.48201	42.9591	5.59e-11	2.79e-09
ENSG00000172061	LRRC15	0.433442	0.268815	0.585317	1.85928	1.9584	1.73963	2.78553	2.63483	2.69543	1.93832	1.93594	42.837	5.95e-11	2.96e-09
ENSG00000225921	NOL7	6.08825	6.08896	6.04271	6.6184	6.66356	6.61583	6.71788	6.62632	6.70457	0.585062	6.48844	42.8011	6.06e-11	3.01e-09
ENSG00000129116	PALLD	4.97018	5.04497	5.01758	5.62212	5.68179	5.54119	5.60721	5.72976	5.74119	0.644753	5.47105	42.7392	6.25e-11	3.1e-09
ENSG00000162642	C1orf52	4.87686	4.74178	4.78367	5.40163	5.377	5.6031	5.52384	5.4533	5.4474	0.668781	5.27957	42.7102	6.35e-11	3.14e-09
ENSG00000165757	JCAD	-4.58787	-3.03734	-4.58787	-1.36334	-1.36125	-1.49139	-0.773904	-0.672795	-0.690107	3.89123	-1.50924	42.5253	6.98e-11	3.43e-09
ENSG00000152137	HSPB8	5.58859	5.58481	5.72347	6.98036	7.01264	6.97289	6.43187	6.48505	6.42662	1.11058	6.45937	42.4731	7.17e-11	3.49e-09
ENSG00000110880	CORO1C	4.80212	4.79174	4.77691	5.56038	5.45844	5.60717	5.36834	5.36105	5.41801	0.675869	5.27343	42.0382	8.95e-11	4.32e-09
ENSG00000169684	CHRNA5	1.78435	1.76167	1.73286	2.83938	2.55337	2.71345	2.50135	2.62573	2.75037	0.916541	2.42452	41.8716	9.75e-11	4.69e-09
ENSG00000081087	OSTM1	2.6307	2.65052	2.62692	3.25814	3.5432	3.62871	3.5791	3.8762	3.77269	0.990293	3.36202	41.8586	9.81e-11	4.71e-09
ENSG00000150051	MKX	-4.58787	-2.62667	-2.55386	0.261323	-0.362513	-0.418356	0.988955	1.20559	1.29575	4.15417	0.119655	41.7818	1.02e-10	4.87e-09
ENSG00000111726	CMAS	4.24449	4.16924	4.20707	4.76411	4.91971	4.83814	5.11968	5.02105	4.9861	0.740065	4.73929	41.7093	1.06e-10	5.04e-09
ENSG00000104331	BPNT2	6.54749	6.56139	6.55729	7.04773	7.1175	7.22899	7.37381	7.309	7.38086	0.693111	7.05218	41.6219	1.11e-10	5.24e-09
ENSG00000164548	TRA2A	5.55818	5.71225	5.63966	6.4912	6.48963	6.66018	6.28768	6.30119	6.22659	0.779858	6.20135	41.6221	1.11e-10	5.24e-09
ENSG00000140391	TSPAN3	6.80474	6.79975	6.78848	7.44403	7.36737	7.43565	7.33083	7.28843	7.36752	0.575847	7.20576	41.5613	1.14e-10	5.38e-09
ENSG00000144476	ACKR3	6.25947	6.21194	6.218	6.69585	6.8198	6.84003	6.82758	6.85375	6.89975	0.594345	6.65189	41.5138	1.17e-10	5.5e-09
ENSG00000166173	LARP6	-0.0622171	0.64692	0.500351	1.5529	1.53838	1.55919	1.46354	1.68882	1.7485	1.22218	1.29396	41.2219	1.36e-10	6.32e-09
ENSG00000166797	CIAO2A	5.97774	5.82831	5.94159	6.4719	6.58183	6.53476	6.52319	6.4702	6.47349	0.59299	6.33802	41.0554	1.48e-10	6.84e-09
ENSG00000243547	HNRNPKP4	6.77717	6.83743	6.7662	7.49812	7.48847	7.43974	7.28691	7.33889	7.34873	0.6086	7.22662	40.9754	1.54e-10	7.09e-09
ENSG00000101298	SNPH	2.74308	2.82807	2.92466	3.55889	3.50473	3.64465	3.77458	3.59779	3.56466	0.77961	3.3949	40.943	1.57e-10	7.2e-09
ENSG00000148110	MFSD14B	6.25206	6.2924	6.23289	6.81997	6.76741	6.86963	6.84367	6.85058	6.78866	0.564683	6.65902	40.8709	1.63e-10	7.45e-09
ENSG00000162734	PEA15	7.41104	7.50563	7.4694	8.39014	8.39234	8.37432	8.11154	8.03283	8.04584	0.771291	8.01944	40.7757	1.71e-10	7.78e-09
ENSG00000135002	RFK	3.96506	4.05899	3.76095	4.62672	4.61234	4.87431	4.64565	4.62301	4.80333	0.768643	4.48779	40.5098	1.96e-10	8.84e-09
ENSG00000140511	HAPLN3	-2.21024	-3.61362	-3.56511	-0.442654	-0.325071	0.190153	1.22648	1.27707	1.4364	4.23397	0.213976	40.2325	2.25e-10	1.02e-08
ENSG00000132109	TRIM21	4.44708	4.31155	4.2901	4.98662	4.94483	5.09917	4.96613	5.1061	4.95018	0.660564	4.82243	40.1662	2.33e-10	1.05e-08
ENSG00000011426	ANLN	6.41877	6.45822	6.4594	6.98784	7.02719	6.95383	6.99408	6.99514	6.99381	0.546735	6.83192	40.1324	2.37e-10	1.07e-08
ENSG00000146072	TNFRSF21	4.45571	4.39093	4.40558	5.01271	5.06956	5.17325	5.39437	5.42342	5.48433	0.854269	5.03844	40.0896	2.43e-10	1.09e-08
ENSG00000018510	AGPS	5.21521	5.25579	5.16634	5.81631	5.88716	5.97314	6.32501	6.29439	6.25726	0.89441	5.86557	40.0205	2.51e-10	1.12e-08
ENSG00000213965	NUDT19	5.10888	5.16999	5.06087	5.67862	5.70573	5.69726	5.68016	5.73506	5.66889	0.581013	5.52569	39.6406	3.05e-10	1.35e-08
ENSG00000088812	ATRN	5.17135	5.23289	5.1074	5.69159	5.76877	5.75556	5.89092	5.76437	5.86023	0.618953	5.61184	39.6175	3.09e-10	1.37e-08
ENSG00000128335	APOL2	5.78858	5.78121	5.72756	6.31861	6.33558	6.26038	6.35035	6.38379	6.3442	0.5669	6.16734	39.612	3.1e-10	1.37e-08
ENSG00000100568	VTI1B	3.11771	3.1086	3.18502	3.99725	3.95441	3.9031	3.70231	3.80342	3.99597	0.761598	3.68515	39.5823	3.15e-10	1.39e-08
ENSG00000113273	ARSB	4.38366	4.4792	4.39679	5.03749	5.03578	5.04014	5.00608	5.06294	4.96767	0.605759	4.85058	39.2678	3.69e-10	1.62e-08
ENSG00000163162	RNF149	6.19778	6.08556	6.22588	6.76219	6.77847	6.78433	6.74314	6.70726	6.67328	0.57139	6.5756	39.1777	3.87e-10	1.69e-08
ENSG00000167779	IGFBP6	-0.716056	-0.178004	0.0404133	1.22422	1.0892	0.790603	1.00406	1.20559	1.325	1.40586	0.786669	39.1748	3.88e-10	1.69e-08
ENSG00000166197	NOLC1	9.33049	9.29827	9.3026	9.85343	9.89315	9.86885	9.81012	9.79177	9.80426	0.526919	9.68223	39.1393	3.95e-10	1.72e-08
ENSG00000128791	TWSG1	2.92398	2.97514	2.97276	3.63476	3.52281	3.73036	3.82862	3.79736	3.84008	0.774939	3.51541	38.9478	4.35e-10	1.89e-08
ENSG00000164038	SLC9B2	4.65374	4.61055	4.58135	5.14989	5.15154	5.25116	5.33063	5.38282	5.31245	0.65099	5.0798	38.9383	4.37e-10	1.89e-08
ENSG00000170085	SIMC1	-2.95634	-3.03734	-3.56511	-0.560792	-0.0257415	-1.27035	0.878519	0.815295	0.431756	3.95613	-0.295229	38.9448	4.36e-10	1.89e-08
ENSG00000130940	CASZ1	1.94827	2.19352	1.99599	3.16506	3.1265	3.01615	2.81152	2.83757	2.84427	0.930532	2.72733	38.9107	4.44e-10	1.91e-08
ENSG00000114648	KLHL18	4.82118	4.76857	4.81149	5.49958	5.50531	5.51232	5.36249	5.36926	5.31427	0.629901	5.24878	38.6512	5.07e-10	2.17e-08
ENSG00000171016	PYGO1	-0.939257	-1.46405	-1.96516	0.732378	0.389046	-0.1435	0.878519	0.995622	0.96513	2.20402	0.260717	38.5454	5.35e-10	2.28e-08
ENSG00000196843	ARID5A	2.72891	2.34926	2.54444	4.13979	4.31908	4.17334	3.59913	3.52135	3.52425	1.37637	3.58983	38.444	5.63e-10	2.4e-08
ENSG00000148484	RSU1	5.152	5.19469	5.19281	5.76044	5.74366	5.67082	5.75463	5.80726	5.79117	0.575745	5.58781	38.4209	5.7e-10	2.42e-08
ENSG00000132434	LANCL2	4.73635	4.80525	4.84741	6.13248	6.05631	6.01754	5.55815	5.55026	5.53449	1.03625	5.56233	38.2395	6.26e-10	2.63e-08
ENSG00000108671	PSMD11	7.95386	7.90284	7.94501	8.73943	8.79304	8.73338	8.50555	8.48053	8.44651	0.689367	8.42803	38.144	6.57e-10	2.75e-08
ENSG00000231991	ANXA2P2	8.93083	8.84581	8.87489	9.37772	9.40928	9.38232	9.42978	9.38657	9.41993	0.516831	9.24849	38.1413	6.58e-10	2.75e-08
ENSG00000173418	NAA20	5.69508	5.65941	5.78201	6.46184	6.44528	6.51631	6.26081	6.21015	6.31943	0.660733	6.18498	38.1066	6.7e-10	2.79e-08
ENSG00000186106	ANKRD46	2.78478	2.65971	2.55501	3.34831	3.34839	3.40101	3.56133	3.41182	3.47943	0.760799	3.21583	38.0448	6.91e-10	2.87e-08
ENSG00000143751	SDE2	5.17658	5.2352	5.12436	5.73716	5.67024	5.78051	5.83551	5.79716	5.76406	0.586025	5.59497	37.8873	7.5e-10	3.1e-08
ENSG00000137692	DCUN1D5	4.41646	4.36308	4.38647	5.2578	5.2077	5.22111	4.9428	4.91113	5.11099	0.727275	4.91106	37.705	8.23e-10	3.38e-08
ENSG00000171612	SLC25A33	3.64861	3.73319	3.76095	4.50825	4.49163	4.56299	4.2282	4.42088	4.35264	0.718612	4.23016	37.6424	8.5e-10	3.48e-08
ENSG00000134265	NAPG	3.12495	2.89183	2.99622	3.61219	3.72376	3.74311	3.91907	3.73526	3.85018	0.762585	3.5554	37.6144	8.62e-10	3.52e-08
ENSG00000198431	TXNRD1	8.87542	8.90217	8.90329	9.46848	9.51391	9.46085	9.38922	9.37995	9.35755	0.535787	9.27196	37.6069	8.65e-10	3.53e-08
ENSG00000106789	CORO2A	3.73624	4.05378	4.12608	4.60631	4.65395	4.70874	4.85178	4.85676	4.86313	0.779786	4.54451	37.5638	8.85e-10	3.6e-08
ENSG00000065183	WDR3	6.42501	6.38325	6.42415	7.07109	7.06822	6.90763	7.38232	7.3714	7.35606	0.793814	6.98518	37.534	8.98e-10	3.65e-08
ENSG00000140443	IGF1R	6.74203	6.78382	6.81841	7.42311	7.40963	7.3537	7.27217	7.26023	7.31633	0.558974	7.17723	37.4052	9.6e-10	3.86e-08
ENSG00000102241	HTATSF1	6.12344	6.09744	6.05905	6.66712	6.706	6.62274	7.00937	6.98094	6.93752	0.735996	6.62311	37.3901	9.67e-10	3.89e-08
ENSG00000135063	ENTREP1	-2.36376	-1.46405	-2.55386	0.456414	-0.0870985	0.331897	0.119415	-0.503519	-0.241151	2.28229	-0.366614	37.3208	1e-09	4.02e-08
ENSG00000117906	RCN2	5.39873	5.27011	5.32144	5.86867	5.94577	6.12126	6.4001	6.28069	6.32713	0.839942	5.94097	37.2625	1.03e-09	4.14e-08
ENSG00000023909	GCLM	0.311944	0.85319	0.75996	1.75599	1.80643	1.67014	1.66708	1.57052	1.71575	1.05468	1.42953	37.2228	1.05e-09	4.21e-08
ENSG00000196937	FAM3C	3.0585	3.1996	3.10814	3.85454	3.7103	4.09596	3.93887	3.84518	3.84008	0.764932	3.67362	37.1714	1.08e-09	4.31e-08
ENSG00000293322	ENSG00000293322	1.31313	1.31521	1.22467	2.13737	2.59303	2.04429	2.66713	2.39887	2.51049	1.13592	2.12191	37.1669	1.08e-09	4.31e-08
ENSG00000300496	ENSG00000300496	1.26156	1.58969	1.38731	3.67234	3.35993	3.27502	2.55875	2.63483	2.66716	1.6873	2.71927	37.0748	1.14e-09	4.51e-08
ENSG00000171202	TMEM126A	4.33927	4.24902	4.39679	4.91927	4.92652	4.95231	4.99478	4.90832	4.8817	0.602561	4.757	37.0213	1.17e-09	4.63e-08
ENSG00000013374	NUB1	5.53258	5.59323	5.46989	6.05552	6.21922	6.06272	6.42382	6.34169	6.22562	0.695275	6.03106	36.9565	1.21e-09	4.77e-08
ENSG00000198830	HMGN2	6.87238	6.76798	6.78259	7.35064	7.45725	7.39971	7.32162	7.32596	7.29662	0.551505	7.19826	36.9061	1.24e-09	4.88e-08
ENSG00000120708	TGFBI	6.49542	6.54506	6.54508	7.22963	7.24395	7.18529	7.68002	7.75314	7.7439	0.966552	7.23876	36.8814	1.26e-09	4.93e-08
ENSG00000115604	IL18R1	-3.5528	-4.58787	-3.56511	-1.10217	-0.218244	-0.665444	1.65756	1.66237	1.70466	5.92464	0.369303	36.7532	1.34e-09	5.24e-08
ENSG00000143633	C1orf131	4.02428	3.88778	3.92479	4.66341	4.75575	4.46638	4.73891	4.57418	4.5774	0.687709	4.43838	36.7567	1.34e-09	5.24e-08
ENSG00000163291	PAQR3	2.45817	2.48466	2.36983	3.04211	3.11292	3.33519	3.27409	3.36338	3.41629	0.828639	3.03702	36.5504	1.49e-09	5.75e-08
ENSG00000101230	ISM1	0.479314	0.292632	0.410066	1.73107	1.53838	1.26137	1.37333	1.37805	1.58887	1.11468	1.20638	36.3013	1.69e-09	6.5e-08
ENSG00000232389	ENSG00000232389	3.58447	3.63878	3.65437	4.26372	4.35557	4.15597	4.47587	4.31165	4.28169	0.686056	4.11656	36.3028	1.69e-09	6.5e-08
ENSG00000165533	TTC8	3.35151	3.21837	3.29631	3.97265	3.96579	3.85303	3.98528	3.92337	4.08628	0.678173	3.77372	36.2665	1.72e-09	6.61e-08
ENSG00000116489	CAPZA1	6.80249	6.82931	6.73457	7.23758	7.29124	7.34745	7.42276	7.36047	7.35473	0.547647	7.1764	36.2354	1.75e-09	6.7e-08
ENSG00000131015	ULBP2	-0.939257	-0.828709	-0.29711	1.13836	0.674313	1.00333	1.98903	1.48254	1.98676	2.19144	1.02793	36.2067	1.77e-09	6.79e-08
ENSG00000126261	UBA2	6.68169	6.67448	6.7522	7.2248	7.27056	7.32255	7.63872	7.60114	7.5909	0.748566	7.24252	36.1994	1.78e-09	6.81e-08
ENSG00000129187	DCTD	4.06809	4.14655	4.14019	4.98487	4.98824	5.02369	4.70233	4.69763	4.73143	0.744836	4.65429	36.1599	1.82e-09	6.93e-08
ENSG00000159322	ADPGK	6.30635	6.36546	6.27626	7.1245	7.14777	7.12732	6.85544	6.83117	6.8737	0.683976	6.80623	36.1521	1.83e-09	6.94e-08
ENSG00000163017	ACTG2	-2.53559	-3.03734	-2.55386	1.84386	1.81484	2.01656	-0.0574982	-0.425789	0.198811	4.31365	0.698434	36.0244	1.95e-09	7.39e-08
ENSG00000182718	ANXA2	9.56308	9.54516	9.55948	10.062	10.0838	10.0455	10.0459	10.0274	10.0287	0.493093	9.9026	36.0014	1.97e-09	7.47e-08
ENSG00000120694	HSPH1	5.9561	5.9253	5.96606	6.61699	6.6386	6.56229	7.09719	7.07669	7.05837	0.912143	6.61605	35.9909	1.98e-09	7.49e-08
ENSG00000165806	CASP7	5.15907	5.15869	5.142	5.69482	5.76769	5.64275	5.95889	5.95623	5.96497	0.684181	5.64302	35.9925	1.98e-09	7.49e-08
ENSG00000165675	ENOX2	3.63601	3.44251	3.52323	4.2477	4.11287	4.29374	4.58414	4.56944	4.34016	0.83433	4.14029	35.914	2.06e-09	7.77e-08
ENSG00000166411	IDH3A	5.0616	5.00589	5.0738	5.6759	5.74806	5.58138	6.05178	6.06077	6.05664	0.829303	5.64893	35.6385	2.38e-09	8.9e-08
ENSG00000086475	SEPHS1	6.39354	6.43165	6.38209	7.08836	7.07349	7.13419	6.94232	6.86249	6.90641	0.602502	6.83061	35.5994	2.42e-09	9.05e-08
ENSG00000231989	PPP1R2B	1.65042	1.19398	1.41078	2.19926	2.4219	2.65169	2.32608	2.3555	2.49127	0.995882	2.1546	35.5416	2.5e-09	9.31e-08
ENSG00000162745	OLFML2B	-4.58787	-4.58787	-3.56511	-2.35219	-0.522829	-1.34033	0.00391521	-0.151009	0.230071	5.36011	-1.01144	35.484	2.57e-09	9.56e-08
ENSG00000164338	UTP15	4.19208	4.16763	3.98857	4.63234	4.88718	4.84505	5.13005	4.81834	4.95953	0.768636	4.67301	35.4177	2.66e-09	9.84e-08
ENSG00000152377	SPOCK1	4.80663	4.76538	4.90432	6.09187	6.15856	6.26996	7.37726	7.42778	7.43782	2.09893	6.49835	35.3943	2.69e-09	9.94e-08
ENSG00000122550	KLHL7	3.84317	4.01493	3.98466	4.55988	4.58801	4.60666	4.45541	4.64794	4.68565	0.643717	4.40822	35.334	2.78e-09	1.02e-07
ENSG00000066583	ISOC1	4.81895	4.7461	4.87509	5.38041	5.29521	5.39473	5.40081	5.40559	5.44574	0.574113	5.22075	35.3236	2.79e-09	1.03e-07
ENSG00000168564	CDKN2AIP	4.11607	3.98235	3.93696	4.57514	4.57445	4.6055	4.77679	4.77064	4.75714	0.666888	4.48981	35.3214	2.8e-09	1.03e-07
ENSG00000198522	GPN1	5.4032	5.44169	5.44453	6.28119	6.28653	6.16612	5.93346	6.01882	5.97826	0.688422	5.92284	35.313	2.81e-09	1.03e-07
ENSG00000182580	EPHB3	-4.58787	-4.58787	-2.97263	-1.22686	-0.522829	-1.66014	-1.58164	-0.971011	-1.17193	3.75543	-1.61053	35.2344	2.92e-09	1.07e-07
ENSG00000182197	EXT1	6.34481	6.29166	6.36792	6.99614	6.96715	7.01401	6.81049	6.8366	6.82941	0.576663	6.74374	35.2053	2.97e-09	1.09e-07
ENSG00000138614	INTS14	5.78972	5.83947	5.78482	6.32557	6.32568	6.26739	6.3933	6.33891	6.39249	0.536497	6.18359	35.1477	3.06e-09	1.11e-07
ENSG00000198833	UBE2J1	4.89813	4.92056	4.88141	5.46913	5.3855	5.42009	5.55046	5.54665	5.64081	0.604904	5.32985	35.1641	3.03e-09	1.11e-07
ENSG00000018699	TTC27	5.13688	5.1383	5.1002	5.58841	5.69551	5.64162	5.78283	5.83268	5.79836	0.601056	5.55206	35.1345	3.08e-09	1.12e-07
ENSG00000197780	TAF13	4.51472	4.55254	4.45299	4.96095	5.08268	5.20123	5.16659	5.181	5.10994	0.612713	4.94271	34.9625	3.36e-09	1.22e-07
ENSG00000143079	CTTNBP2NL	4.42674	4.51127	4.52331	5.11579	5.2013	4.96234	5.45266	5.39023	5.35472	0.769099	5.0424	34.8787	3.51e-09	1.27e-07
ENSG00000138663	COPS4	4.21429	4.13012	4.12253	4.63682	4.77311	4.78879	4.80402	4.73935	4.78108	0.599687	4.58158	34.8579	3.55e-09	1.28e-07
ENSG00000165895	ARHGAP42	3.42367	3.40749	3.30886	4.08838	4.25563	4.12546	4.05948	4.01333	3.91172	0.701209	3.88231	34.7864	3.68e-09	1.33e-07
ENSG00000124532	MRS2	4.91283	4.95455	4.89395	5.44378	5.50141	5.52037	5.80726	5.78035	5.8344	0.73673	5.45059	34.7538	3.74e-09	1.34e-07
ENSG00000143155	TIPRL	5.43846	5.44103	5.49892	5.972	5.92601	6.08834	6.11186	6.05274	5.98114	0.564304	5.85899	34.7583	3.73e-09	1.34e-07
ENSG00000175471	MCTP1	-1.0653	-0.592241	-0.687784	0.515991	0.692684	0.460952	1.21354	1.21775	1.38177	1.79148	0.573268	34.5566	4.14e-09	1.48e-07
ENSG00000136045	PWP1	6.59514	6.45986	6.55301	7.03654	7.07415	7.05335	7.08191	7.05356	7.02562	0.517476	6.90164	34.5103	4.24e-09	1.51e-07
ENSG00000088205	DDX18	5.62985	5.61641	5.60192	6.22129	6.23576	6.2058	6.66182	6.65175	6.60711	0.830178	6.2185	34.4985	4.27e-09	1.52e-07
ENSG00000143183	TMCO1	6.50515	6.41513	6.35475	6.94626	6.91407	6.91727	7.03027	6.97177	6.96884	0.532483	6.80205	34.4887	4.29e-09	1.52e-07
ENSG00000011105	TSPAN9	3.35766	3.31748	3.22859	3.97619	3.88222	4.0368	3.83708	4.08313	4.05171	0.680437	3.78799	34.1523	5.1e-09	1.78e-07
ENSG00000169857	AVEN	4.50089	4.48438	4.38203	5.28088	5.22753	5.2332	5.00232	4.97701	5.03449	0.675658	4.93954	34.1571	5.08e-09	1.78e-07
ENSG00000125827	TMX4	5.25449	5.21742	5.18772	5.76198	5.74587	5.75294	5.76908	5.78546	5.69713	0.532801	5.59583	34.1151	5.19e-09	1.81e-07
ENSG00000100519	PSMC6	4.39418	4.41011	4.38795	5.02387	5.11539	5.11396	4.88888	4.93066	4.9572	0.611258	4.83155	33.9398	5.68e-09	1.97e-07
ENSG00000197181	PIWIL2	-3.5528	-3.2969	-3.56511	-1.68247	-1.43911	-1.34033	-1.05781	-1.34737	-0.749845	2.88003	-1.6883	33.937	5.69e-09	1.97e-07
ENSG00000148925	BTBD10	4.31891	4.35603	4.44021	5.0058	4.94675	5.01409	5.02842	5.2321	4.88293	0.651193	4.83675	33.8716	5.89e-09	2.03e-07
ENSG00000103978	TMEM87A	4.12692	4.08991	4.03273	4.51557	4.74038	4.71414	4.79101	4.74461	4.75445	0.629971	4.5319	33.8447	5.97e-09	2.06e-07
ENSG00000108175	ZMIZ1	6.56022	6.52886	6.62031	7.15175	7.10426	7.13157	7.05768	7.05525	7.02645	0.518497	6.93559	33.7855	6.15e-09	2.12e-07
ENSG00000160145	KALRN	-1.35618	-0.935334	-1.96516	-0.0481458	0.636855	0.331897	1.11955	1.32282	0.888834	2.25232	0.350152	33.6854	6.48e-09	2.22e-07
ENSG00000021574	SPAST	3.67102	3.69795	3.66661	4.18331	4.29524	4.45867	4.44714	4.59531	4.67433	0.77444	4.2369	33.6608	6.56e-09	2.24e-07
ENSG00000127124	HIVEP3	1.51382	1.50046	1.96461	2.7093	2.61246	2.40133	2.90302	3.00481	3.06835	1.13428	2.51347	33.6132	6.72e-09	2.3e-07
ENSG00000086065	CHMP5	5.5488	5.60695	5.5434	6.02038	6.07831	6.16691	6.18494	6.07296	6.12059	0.542057	5.94946	33.5986	6.77e-09	2.31e-07
ENSG00000078900	TP73	0.386064	0.0626347	0.455915	2.23515	2.12999	2.02354	3.78555	3.87236	3.75668	2.92765	2.70578	33.439	7.35e-09	2.49e-07
ENSG00000240489	SETP14	5.19216	5.16193	5.12702	5.63618	5.73094	5.73656	6.00421	5.76385	5.83757	0.629315	5.60871	33.4429	7.34e-09	2.49e-07
ENSG00000139970	RTN1	-2.21024	-0.729425	-1.84911	0.875721	0.746433	0.854649	2.57907	2.34445	2.39801	3.44259	1.33157	33.4143	7.45e-09	2.52e-07
ENSG00000170385	SLC30A1	6.34635	6.37734	6.33495	6.81726	6.83797	7.06693	6.88838	6.91057	6.90278	0.553482	6.74434	33.4165	7.44e-09	2.52e-07
ENSG00000198873	GRK5	5.28871	5.28503	5.28539	5.75427	5.87966	5.86262	5.79048	5.78444	5.83884	0.533101	5.66241	33.3451	7.72e-09	2.6e-07
ENSG00000163636	PSMD6	5.33545	5.19073	5.19956	5.74962	5.87162	5.81663	5.85387	5.75918	5.74187	0.556909	5.63705	33.3053	7.88e-09	2.64e-07
ENSG00000087302	RTRAF	5.81285	5.80159	5.87354	6.38136	6.36487	6.40208	6.26395	6.33752	6.36283	0.523429	6.19858	33.2765	7.99e-09	2.68e-07
ENSG00000156466	GDF6	-2.53559	-3.03734	-2.55386	-0.689473	-0.703213	-0.758199	0.119415	0.411577	0.722953	3.02479	-0.517459	33.2182	8.24e-09	2.75e-07
ENSG00000145220	LYAR	4.76903	4.81351	4.84094	5.34252	5.4718	5.27037	5.42206	5.42997	5.32607	0.57136	5.21251	33.1569	8.5e-09	2.83e-07
ENSG00000197106	SLC6A17	2.1101	2.23713	2.10791	2.9551	2.97713	2.80545	3.08455	3.24952	3.42644	0.948816	2.84506	33.1272	8.63e-09	2.87e-07
ENSG00000100532	CGRRF1	1.18057	1.29177	1.47899	2.2586	2.04674	2.2488	2.07739	2.19253	2.41171	0.897642	1.97061	33.1145	8.69e-09	2.89e-07
ENSG00000104131	EIF3J	4.44419	4.41283	4.48651	4.91558	5.13232	4.98576	5.29038	5.12479	5.11832	0.652098	4.9132	33.0873	8.81e-09	2.91e-07
ENSG00000259410	ENSG00000259410	-1.20342	-0.729425	-1.22522	-0.106852	0.476465	0.540991	0.776627	0.533344	0.808276	1.6391	0.170365	32.9299	9.55e-09	3.14e-07
ENSG00000135829	DHX9	8.45341	8.42213	8.42929	8.99579	9.04019	8.93275	9.39384	9.36585	9.39089	0.765316	8.98734	32.8411	1e-08	3.28e-07
ENSG00000106591	MRPL32	5.10156	5.18279	5.14899	5.91597	6.01676	5.99728	5.74342	5.56937	5.77404	0.700393	5.64687	32.7696	1.04e-08	3.4e-07
ENSG00000121671	CRY2	4.53929	4.6058	4.60316	5.23434	5.15154	5.30731	5.1965	5.07552	5.07055	0.593019	5.00354	32.7593	1.04e-08	3.41e-07
ENSG00000035403	VCL	8.63418	8.65004	8.65942	9.11226	9.10726	9.08115	9.26508	9.29802	9.2887	0.547171	9.03469	32.7066	1.07e-08	3.49e-07
ENSG00000065150	IPO5	8.43662	8.45284	8.43189	8.93865	8.96029	8.90206	9.23828	9.2503	9.18466	0.646156	8.90162	32.6449	1.11e-08	3.59e-07
ENSG00000163607	GTPBP8	3.19879	3.05042	3.14709	3.85069	3.75469	3.74944	3.76574	3.6814	3.87016	0.648983	3.59491	32.6392	1.11e-08	3.6e-07
ENSG00000154174	TOMM70	6.34481	6.4775	6.45022	6.95391	6.99262	6.98054	7.37689	7.30918	7.32721	0.743103	6.9604	32.6246	1.12e-08	3.62e-07
ENSG00000107159	CA9	1.51382	1.69174	1.42238	3.05221	3.14329	3.25736	4.69769	4.75821	4.66436	2.59887	3.65945	32.6173	1.12e-08	3.63e-07
ENSG00000136518	ACTL6A	6.80924	6.76346	6.79324	7.21491	7.31014	7.27049	7.3169	7.27303	7.31405	0.495057	7.13681	32.6137	1.12e-08	3.63e-07
ENSG00000101665	SMAD7	4.19035	4.25812	4.38795	4.84957	4.89909	5.17717	4.897	4.97432	4.84936	0.66588	4.75644	32.5252	1.18e-08	3.79e-07
ENSG00000005448	WDR54	0.987737	0.753738	0.313752	1.71421	1.68322	1.83797	2.23936	2.29938	2.36318	1.35878	1.72408	32.3887	1.26e-08	4.06e-07
ENSG00000013364	MVP	5.88492	5.83543	5.88616	6.41468	6.27629	6.38218	6.50106	6.54087	6.59628	0.586989	6.2854	32.203	1.39e-08	4.46e-07
ENSG00000101811	CSTF2	6.12163	6.05063	6.04412	6.90158	6.9277	6.89627	6.57975	6.63315	6.56022	0.686587	6.56419	32.1297	1.44e-08	4.62e-07
ENSG00000175110	MRPS22	5.10156	5.22827	5.15596	5.82173	5.87414	5.87232	5.64204	5.65738	5.67883	0.59895	5.58805	32.0765	1.48e-08	4.73e-07
ENSG00000103089	FA2H	1.26156	1.11603	1.62661	2.30437	2.44376	2.05114	2.76793	2.69696	2.57886	1.15512	2.20284	32.067	1.49e-08	4.75e-07
ENSG00000180488	MIGA1	4.24615	4.31301	4.0719	4.74348	4.90895	4.91337	4.75797	4.8273	4.79421	0.612806	4.64926	32.0624	1.49e-08	4.76e-07
ENSG00000132664	POLR3F	2.86473	2.86428	2.90413	3.48875	3.44367	3.51935	3.60905	3.78719	3.64224	0.711248	3.38651	31.9913	1.55e-08	4.93e-07
ENSG00000179954	SSC5D	2.24236	2.26147	2.41695	3.26395	2.93532	3.12078	3.44989	3.58845	3.11515	0.959532	3.00948	31.9897	1.55e-08	4.93e-07
ENSG00000121579	NAA50	7.31904	7.29368	7.23845	7.73605	7.77187	7.86319	8.07935	8.12873	8.07344	0.666613	7.76074	31.9219	1.6e-08	5.08e-07
ENSG00000135249	RINT1	3.57129	3.68225	3.68116	4.3481	4.32939	4.09761	4.62869	4.49395	4.47511	0.760441	4.1933	31.9051	1.62e-08	5.12e-07
ENSG00000138347	MYPN	7.88829	7.89824	7.88422	8.36293	8.43942	8.31828	8.36176	8.38679	8.35033	0.48021	8.22741	31.8482	1.67e-08	5.25e-07
ENSG00000254612	DNAJB6P1	5.1279	5.15545	5.16892	5.64954	5.68006	5.63479	5.70233	5.69756	5.62767	0.515288	5.51361	31.796	1.71e-08	5.39e-07
ENSG00000109133	TMEM33	5.6425	5.78279	5.61461	6.12094	6.17621	6.25446	6.24619	6.26209	6.2601	0.539256	6.06265	31.7592	1.75e-08	5.49e-07
ENSG00000102317	RBM3	7.34036	7.28332	7.2886	7.78645	7.80944	7.85428	8.19414	8.12318	8.12697	0.688001	7.79724	31.7445	1.76e-08	5.52e-07
ENSG00000169605	GKN1	-1.0653	-0.828709	-0.902401	0.476548	0.411402	1.03131	0.20035	0.552676	0.31998	1.52632	0.187116	31.7372	1.77e-08	5.54e-07
ENSG00000187736	NHEJ1	2.86473	3.02931	2.91648	3.82147	3.88821	3.78891	3.40221	3.60937	3.79637	0.790927	3.50877	31.6619	1.83e-08	5.75e-07
ENSG00000104356	POP1	6.08733	6.07787	6.09209	6.57325	6.63207	6.51415	6.59978	6.58055	6.58688	0.495996	6.43445	31.64	1.86e-08	5.8e-07
ENSG00000151092	NGLY1	4.11062	4.08139	3.94502	4.49598	4.77635	4.60782	4.90104	4.83817	4.83291	0.702434	4.55069	31.5199	1.97e-08	6.16e-07
ENSG00000167157	PRRX2	3.11044	3.0539	3.01931	4.20459	3.97707	3.94048	3.72757	3.76457	3.63933	0.830298	3.66217	31.4825	2.01e-08	6.26e-07
ENSG00000107731	UNC5B	3.27554	3.21214	3.42291	4.26372	4.39677	4.2363	3.88275	4.0461	3.90931	0.832048	3.90835	31.433	2.06e-08	6.39e-07
ENSG00000168228	ZCCHC4	3.31086	3.43182	3.07913	3.94943	3.91779	3.84517	4.03945	4.01507	4.10748	0.701506	3.78359	31.432	2.07e-08	6.39e-07
ENSG00000184185	KCNJ12	2.08065	2.04718	1.98038	3.02513	2.76348	2.85326	3.51725	3.49661	3.55544	1.20928	2.93686	31.3538	2.15e-08	6.64e-07
ENSG00000197498	RPF2	4.52843	4.48567	4.53404	5.03664	5.13484	5.02891	5.1866	5.13043	4.97114	0.56822	4.91799	31.351	2.15e-08	6.64e-07
ENSG00000059378	PARP12	5.66377	5.68213	5.67098	6.31652	6.34686	6.33595	6.10224	6.11745	6.21833	0.571143	6.07673	31.2955	2.22e-08	6.81e-07
ENSG00000198246	SLC29A3	2.82086	2.73117	2.69063	3.66139	3.73488	3.7067	3.40506	3.42236	3.29958	0.804246	3.32816	31.2804	2.23e-08	6.86e-07
ENSG00000145386	CCNA2	5.93517	6.03085	6.07153	6.46499	6.46846	6.60423	6.74792	6.77569	6.76217	0.629861	6.46233	31.2708	2.24e-08	6.88e-07
ENSG00000103035	PSMD7	5.99856	5.90613	6.0157	6.41403	6.48502	6.46786	6.55431	6.5069	6.46572	0.509012	6.33247	31.224	2.3e-08	7.01e-07
ENSG00000144158	SNRPA1P1	4.70652	4.78964	4.68965	5.40623	5.50596	5.445	5.32312	5.2041	5.19755	0.62332	5.17263	31.2274	2.3e-08	7.01e-07
ENSG00000185238	PRMT3	4.74106	4.59147	4.8431	5.25562	5.3042	5.28424	5.39509	5.56104	5.57614	0.673704	5.21038	31.2181	2.31e-08	7.03e-07
ENSG00000122862	SRGN	3.32663	3.19328	3.18161	3.8116	3.95821	3.84319	4.33362	4.16234	4.10958	0.815284	3.82453	31.1957	2.33e-08	7.09e-07
ENSG00000054118	THRAP3	7.64097	7.64846	7.64434	8.11508	8.15917	8.03661	8.20603	8.15308	8.12059	0.488169	7.9876	31.1758	2.36e-08	7.14e-07
ENSG00000137996	RTCA	5.04072	5.07961	5.13849	5.62663	5.66036	5.67637	6.03119	6.10318	6.02969	0.782388	5.65195	31.1773	2.36e-08	7.14e-07
ENSG00000058804	NDC1	7.24794	7.30635	7.28563	7.70759	7.73675	7.76231	7.97023	7.96151	7.90858	0.565138	7.68031	31.0322	2.54e-08	7.67e-07
ENSG00000116299	ELAPOR1	2.23569	2.61789	2.68583	3.40719	3.52281	3.54869	3.30186	3.27302	3.14415	0.851605	3.14298	31.0109	2.57e-08	7.74e-07
ENSG00000119616	FCF1	4.6932	4.70232	4.6284	5.14203	5.2093	5.27769	5.56263	5.40758	5.3485	0.65686	5.14381	30.9658	2.63e-08	7.9e-07
ENSG00000113594	LIFR	5.69083	5.74606	5.71701	6.21269	6.24823	6.21802	6.22055	6.14518	6.25441	0.498998	6.06905	30.9514	2.65e-08	7.94e-07
ENSG00000115652	UXS1	4.26264	4.39093	4.40704	4.85054	5.07657	4.85193	5.13177	4.94901	4.97576	0.622159	4.79747	30.8753	2.75e-08	8.21e-07
ENSG00000173674	EIF1AX	5.6712	5.62465	5.56055	6.0446	6.10255	6.3342	6.15691	6.32281	6.27563	0.591202	6.03898	30.8744	2.75e-08	8.21e-07
ENSG00000116675	DNAJC6	5.15554	4.96107	5.12525	5.61646	5.61653	5.56651	5.69885	5.66462	5.59502	0.54465	5.46748	30.8698	2.76e-08	8.22e-07
ENSG00000158457	TSPAN33	0.00204727	0.609481	0.0993812	1.67989	1.76362	1.65223	1.50661	1.07798	1.29575	1.27833	1.20779	30.7926	2.87e-08	8.53e-07
ENSG00000102098	SCML2	4.37762	4.41825	4.27739	4.99188	5.05898	5.0341	4.91209	4.87415	4.81884	0.593124	4.77942	30.7681	2.91e-08	8.63e-07
ENSG00000124831	LRRFIP1	5.77024	5.82984	5.71701	6.22836	6.30232	6.24104	6.30799	6.32492	6.25251	0.503815	6.12754	30.748	2.94e-08	8.71e-07
ENSG00000105971	CAV2	5.01077	4.92438	4.92077	5.45714	5.3447	5.60891	5.614	5.60684	5.66317	0.601239	5.37944	30.6565	3.08e-08	9.09e-07
ENSG00000171262	FAM98B	5.1243	5.13336	5.03468	5.57037	5.55385	5.75346	5.95209	5.84008	5.88315	0.668921	5.57625	30.6596	3.08e-08	9.09e-07
ENSG00000119927	GPAM	2.26217	2.04718	2.32111	2.80396	2.97713	2.89574	3.16405	3.16726	3.2317	0.838506	2.81971	30.6336	3.12e-08	9.17e-07
ENSG00000169271	HSPB3	-0.522805	-0.828709	-0.29711	1.18805	1.47611	0.945683	0.958255	0.411577	0.722953	1.58141	0.638711	30.6338	3.12e-08	9.17e-07
ENSG00000198945	L3MBTL3	-3.5528	-4.58787	-4.58787	-2.50172	-1.80092	-1.49139	-0.880858	-0.971011	-1.3454	4.33872	-1.88758	30.606	3.16e-08	9.29e-07
ENSG00000147475	ERLIN2	5.76446	5.68775	5.58203	6.15725	6.14612	6.22372	6.35699	6.25805	6.42366	0.584673	6.09466	30.5916	3.18e-08	9.35e-07
ENSG00000165732	DDX21	8.05056	8.01592	8.04543	8.62007	8.70274	8.59258	9.18329	9.14025	9.13456	0.881475	8.68025	30.5416	3.27e-08	9.58e-07
ENSG00000143756	FBXO28	5.41947	5.5525	5.38207	5.8791	5.94002	6.03405	6.15056	6.09125	6.17682	0.596182	5.87655	30.4874	3.36e-08	9.84e-07
ENSG00000119318	RAD23B	7.7416	7.76704	7.73546	8.18939	8.16555	8.28961	8.48113	8.49239	8.44901	0.602813	8.1765	30.4772	3.38e-08	9.88e-07
ENSG00000196923	PDLIM7	6.50272	6.51469	6.4938	7.86313	7.79689	7.78419	7.11621	7.20346	7.24782	1.03286	7.26685	30.4509	3.42e-08	9.99e-07
ENSG00000196639	HRH1	2.71939	3.06086	2.68583	3.62802	3.63155	3.60097	4.05586	4.25081	4.24007	1.10095	3.64753	30.395	3.52e-08	1.02e-06
ENSG00000127125	PPCS	4.74576	4.67992	4.59165	5.19007	5.26023	5.15508	5.49939	5.48635	5.51876	0.686464	5.16514	30.3795	3.55e-08	1.03e-06
ENSG00000131871	SELENOS	5.93362	6.04844	5.93402	6.73738	6.75353	6.75396	6.43396	6.4819	6.47309	0.640095	6.4294	30.366	3.58e-08	1.04e-06
ENSG00000083937	CHMP2B	4.18171	4.30864	4.1472	4.68087	4.68754	4.95231	4.91908	4.96984	4.9443	0.650755	4.67832	30.2732	3.75e-08	1.08e-06
ENSG00000148634	HERC4	6.69815	6.7067	6.68851	7.15312	7.19364	7.15163	7.19856	7.16256	7.13778	0.468745	7.02646	30.1706	3.96e-08	1.14e-06
ENSG00000157613	CREB3L1	0.689054	1.00508	0.882535	1.81253	2.11644	1.7053	1.68594	1.68006	1.96834	0.985202	1.57971	30.1075	4.09e-08	1.17e-06
ENSG00000110876	SELPLG	-0.312779	-0.279708	-0.0528198	1.22422	1.31943	1.52023	0.647878	0.96709	0.869112	1.37479	0.801693	30.0888	4.13e-08	1.18e-06
ENSG00000185404	SP140L	2.59988	2.42125	2.41695	3.17125	3.31321	3.15298	3.77458	3.69668	3.44321	0.968681	3.1899	30.0627	4.18e-08	1.2e-06
ENSG00000068383	INPP5A	4.47989	4.55501	4.53003	5.69159	5.80511	5.82465	5.1531	5.17633	5.25757	0.993877	5.25319	30.0286	4.26e-08	1.21e-06
ENSG00000103196	CRISPLD2	-1.72091	-2.30737	-1.08731	1.18805	0.617754	0.309219	0.419027	-0.151009	-0.00446324	2.23708	0.0502114	30.0242	4.27e-08	1.22e-06
ENSG00000143106	PSMA5	7.76349	7.74307	7.73051	8.602	8.60262	8.63217	8.25835	8.23099	8.25263	0.695744	8.24458	29.9638	4.4e-08	1.25e-06
ENSG00000117395	EBNA1BP2	8.10233	8.03888	8.05127	8.92892	8.97812	8.8985	8.55311	8.57728	8.57751	0.699732	8.56631	29.917	4.51e-08	1.28e-06
ENSG00000145391	SETD7	6.42794	6.32849	6.40309	6.80587	6.94097	6.90409	7.19424	7.19464	7.2052	0.662936	6.86087	29.9047	4.54e-08	1.28e-06
ENSG00000176853	FAM91A1	4.37913	4.4196	4.31208	4.80747	4.92942	4.90677	5.03395	5.02711	4.91695	0.568809	4.77337	29.9155	4.51e-08	1.28e-06
ENSG00000113460	BRIX1	6.03165	6.0515	6.08709	6.5224	6.55321	6.50263	6.82572	6.76951	6.75816	0.604536	6.48651	29.8693	4.62e-08	1.31e-06
ENSG00000090530	P3H2	7.20507	7.21153	7.20569	7.79524	7.84555	7.77491	7.64761	7.6402	7.63317	0.518028	7.57246	29.8319	4.71e-08	1.33e-06
ENSG00000061794	MRPS35	6.52203	6.43667	6.44703	6.8741	6.98356	6.95383	7.17789	7.21582	7.17691	0.600697	6.8958	29.8026	4.78e-08	1.35e-06
ENSG00000072849	DERL2	5.71619	5.66341	5.68248	6.29117	6.30232	6.34921	6.15438	6.14756	6.11902	0.543055	6.07091	29.8077	4.77e-08	1.35e-06
ENSG00000112308	C6orf62	6.78319	6.76851	6.75936	7.24951	7.34159	7.36766	7.19856	7.22696	7.21084	0.497149	7.11994	29.7588	4.89e-08	1.38e-06
ENSG00000137547	MRPL15	6.63019	6.64327	6.62313	7.25772	7.28255	7.16984	7.04838	7.09246	7.08319	0.526451	7.00346	29.6039	5.3e-08	1.48e-06
ENSG00000134152	KATNBL1	3.12134	3.02931	2.86643	3.446	3.72822	3.946	3.89901	3.77078	3.92849	0.789118	3.57826	29.595	5.32e-08	1.49e-06
ENSG00000249306	LINC01411	0.260327	0.804321	0.645911	2.07271	2.1633	1.93744	3.59664	3.47904	3.39576	2.38926	2.49441	29.595	5.32e-08	1.49e-06
ENSG00000074590	NUAK1	5.54476	5.5055	5.55002	6.19533	6.18272	6.22334	5.95937	6.00967	6.00731	0.567201	5.93493	29.5799	5.37e-08	1.5e-06
ENSG00000071073	MGAT4A	-0.823344	-0.145636	-0.0210679	0.890803	1.01814	0.885636	1.48523	0.78292	1.10659	1.37548	0.722349	29.5307	5.5e-08	1.53e-06
ENSG00000139354	GAS2L3	3.31402	3.41021	3.29631	3.79566	3.94869	4.06753	3.98147	4.16392	4.00277	0.658396	3.81029	29.4219	5.82e-08	1.62e-06
ENSG00000142864	SERBP1	9.31629	9.29473	9.31256	9.76085	9.75246	9.82995	10.1184	10.1007	10.1111	0.647268	9.76989	29.3643	6e-08	1.66e-06
ENSG00000197019	SERTAD1	3.95291	4.05029	4.24837	5.50816	5.35842	5.36343	4.76797	4.80228	4.8481	1.05342	4.86778	29.3766	5.96e-08	1.66e-06
ENSG00000023734	STRAP	8.0384	7.98371	8.01356	8.40786	8.46043	8.44859	8.61331	8.63241	8.59506	0.517026	8.37641	29.3581	6.02e-08	1.67e-06
ENSG00000291152	SBDSP1	3.18154	3.06432	3.09371	4.17101	4.18925	4.27777	3.63111	3.90281	3.76203	0.898288	3.76784	29.3513	6.04e-08	1.67e-06
ENSG00000065427	KARS1	7.97977	8.03348	7.93366	8.5558	8.5608	8.50495	8.39724	8.42638	8.40934	0.49454	8.33059	29.3356	6.09e-08	1.68e-06
ENSG00000139372	TDG	5.31029	5.3895	5.32608	5.80888	5.90696	5.88532	6.24698	6.19562	6.26482	0.721543	5.86073	29.3363	6.08e-08	1.68e-06
ENSG00000142871	CCN1	7.17228	7.18712	7.20402	9.10334	9.10811	9.0884	8.1512	8.13265	8.05255	1.50162	8.33895	29.2542	6.35e-08	1.74e-06
ENSG00000156374	PCGF6	3.19535	3.44782	3.3489	3.96911	3.77423	4.09761	4.21365	4.08313	4.10748	0.714451	3.84651	29.2618	6.32e-08	1.74e-06
ENSG00000084733	RAB10	5.63302	5.74768	5.79768	6.14118	6.22594	6.24441	6.43536	6.41614	6.46079	0.598138	6.15254	29.2245	6.45e-08	1.77e-06
ENSG00000181163	NPM1	9.32422	9.30858	9.31139	9.72943	9.77318	9.71994	9.96855	9.95504	9.94775	0.538402	9.69499	29.1281	6.77e-08	1.86e-06
ENSG00000289526	ENSG00000289526	-1.62073	-1.11168	-0.687784	0.329327	0.170528	0.671188	0.20035	0.411577	-0.00446324	1.48536	-0.0157154	29.0404	7.09e-08	1.94e-06
ENSG00000174132	FAM174A	1.74734	2.08176	1.47899	2.56162	2.72829	3.10441	2.61396	2.72279	2.78235	0.979263	2.50619	29.0276	7.14e-08	1.95e-06
ENSG00000119335	SET	4.07371	4.10344	3.99828	4.6667	4.5545	4.55579	4.66122	4.5988	4.57436	0.544532	4.44329	28.9407	7.46e-08	2.03e-06
ENSG00000092199	HNRNPC	9.68347	9.68244	9.66611	10.1072	10.1412	10.1181	10.1226	10.0985	10.1089	0.43881	9.98419	28.91	7.58e-08	2.06e-06
ENSG00000147669	POLR2K	5.02437	5.13171	5.15769	5.60393	5.55197	5.6031	5.614	5.64786	5.62987	0.503395	5.45978	28.8554	7.8e-08	2.11e-06
ENSG00000173598	NUDT4	4.18171	4.25206	4.11897	4.66341	4.62913	4.90866	5.02101	4.9992	5.00542	0.695671	4.68346	28.8152	7.96e-08	2.15e-06
ENSG00000140307	GTF2A2	2.38173	2.30311	2.35175	3.11135	3.06789	2.94438	2.91506	3.0013	2.96994	0.662232	2.81592	28.7978	8.03e-08	2.16e-06
ENSG00000174010	KLHL15	4.26264	4.31155	4.22869	4.68087	4.79984	4.799	4.86839	4.92881	4.89639	0.563711	4.6667	28.8044	8.01e-08	2.16e-06
ENSG00000111300	NAA25	5.77542	5.69	5.71289	6.19723	6.24745	6.18337	6.21285	6.22717	6.16474	0.479585	6.06301	28.7413	8.27e-08	2.22e-06
ENSG00000149089	APIP	3.77354	3.77183	3.61702	4.54447	4.42726	4.54127	4.26001	4.30596	4.21098	0.667131	4.19848	28.691	8.49e-08	2.27e-06
ENSG00000099282	TSPAN15	-2.95634	-1.31263	-3.56511	-0.168049	-0.288576	-0.0235017	0.845348	0.78292	0.927486	2.96102	-0.0512511	28.643	8.7e-08	2.32e-06
ENSG00000122692	SMU1	7.02299	7.00042	7.01906	7.43923	7.46978	7.46528	7.48146	7.4716	7.45715	0.450082	7.32918	28.6218	8.8e-08	2.35e-06
ENSG00000188385	JAKMIP3	-0.665263	-0.113978	-0.457851	1.23608	1.06119	1.03131	0.666989	0.453318	0.888834	1.34938	0.59579	28.6044	8.88e-08	2.37e-06
ENSG00000132463	GRSF1	6.8892	6.91812	6.89634	7.3245	7.35949	7.31153	7.49222	7.57257	7.49383	0.527883	7.27364	28.5873	8.96e-08	2.39e-06
ENSG00000066697	MSANTD3	2.68064	2.51028	2.81898	3.61446	3.49952	3.40903	3.30186	3.33853	3.24706	0.736777	3.20248	28.5766	9.01e-08	2.4e-06
ENSG00000170965	PLAC1	-2.36376	-2.30737	-2.22969	0.372945	-0.965927	-0.496109	-0.371682	-0.585676	-0.329542	2.1985	-0.741403	28.5174	9.29e-08	2.46e-06
ENSG00000095203	EPB41L4B	3.80315	3.87994	3.90839	4.39909	4.40376	4.40353	4.58665	4.42219	4.37553	0.570316	4.26773	28.5017	9.36e-08	2.48e-06
ENSG00000121653	MAPK8IP1	1.68997	2.26749	1.89974	2.77986	2.85604	2.59188	2.86629	2.97288	2.9419	0.871667	2.60457	28.477	9.48e-08	2.51e-06
ENSG00000151726	ACSL1	2.89042	2.50009	2.7608	3.74053	3.50212	3.70887	4.52252	4.40368	4.61341	1.42744	3.80925	28.378	9.98e-08	2.63e-06
ENSG00000170632	ARMC10	2.31373	2.12883	2.25132	2.96938	2.98088	2.73062	2.93491	3.0013	2.92289	0.698052	2.73007	28.3798	9.97e-08	2.63e-06
ENSG00000155393	HEATR3	4.1359	4.10848	4.12431	4.6301	4.59413	4.63771	4.75239	4.73301	4.90004	0.589186	4.54061	28.3372	1.02e-07	2.68e-06
ENSG00000064651	SLC12A2	3.40596	3.46888	3.5499	3.92216	4.17951	4.06414	4.22336	4.03239	4.20116	0.632761	3.92615	28.2621	1.06e-07	2.79e-06
ENSG00000123213	NLN	5.81005	5.81244	5.84313	6.21943	6.45069	6.23617	6.56613	6.54872	6.54942	0.613997	6.25863	28.2578	1.06e-07	2.79e-06
ENSG00000131236	CAP1	8.31352	8.31781	8.32352	8.72366	8.78196	8.69071	8.85186	8.86446	8.83013	0.47366	8.65064	28.2536	1.06e-07	2.79e-06
ENSG00000145293	ENOPH1	4.68099	4.62469	4.55789	5.14361	5.06075	5.25562	5.443	5.48131	5.56086	0.714238	5.13456	28.2053	1.09e-07	2.86e-06
ENSG00000162408	NOL9	5.17571	5.1226	5.11725	5.66662	5.65569	5.75766	5.70753	5.64955	5.51162	0.522073	5.5064	28.155	1.12e-07	2.92e-06
ENSG00000121766	ZCCHC17	5.47995	5.5611	5.58655	5.98655	6.06427	6.01972	6.04175	6.04721	5.98801	0.481981	5.88152	28.1286	1.14e-07	2.95e-06
ENSG00000146243	IRAK1BP1	-2.53559	-2.04608	-2.55386	-0.442654	-0.703213	-0.665444	-0.188772	0.681196	-0.329542	2.41978	-0.615602	28.1243	1.14e-07	2.95e-06
ENSG00000105993	DNAJB6	6.27905	6.33029	6.27786	6.83686	6.92139	6.90007	6.70667	6.69996	6.7834	0.514914	6.65862	28.1006	1.15e-07	2.99e-06
ENSG00000114738	MAPKAPK3	6.96371	6.97097	6.98281	7.74217	7.69379	7.7051	7.41731	7.39937	7.44845	0.602912	7.40091	28.0399	1.19e-07	3.05e-06
ENSG00000115758	ODC1	6.74965	6.69166	6.7882	7.63107	7.58828	7.59325	7.19712	7.24378	7.26136	0.687728	7.23633	28.0394	1.19e-07	3.05e-06
ENSG00000226268	ENSG00000226268	2.73838	2.53045	2.66646	3.62577	3.6575	3.64917	3.20385	3.33295	3.25468	0.824561	3.24261	28.0418	1.19e-07	3.05e-06
ENSG00000138061	CYP1B1	5.40469	5.33749	5.41581	5.77525	5.96148	6.02886	5.98625	5.94256	5.8197	0.536023	5.76451	28.0249	1.2e-07	3.07e-06
ENSG00000162972	MAIP1	3.748	3.68676	3.75866	4.25792	4.30123	4.26899	4.30035	4.20267	4.41517	0.56194	4.12848	28.0017	1.21e-07	3.11e-06
ENSG00000165832	TRUB1	3.9075	3.82384	4.06822	4.42782	4.48637	4.60782	4.76353	4.88373	4.90247	0.754799	4.47989	27.9663	1.23e-07	3.16e-06
ENSG00000141127	PRPSAP2	5.0738	5.14649	5.01662	5.63225	5.64452	5.69507	5.53624	5.51065	5.56622	0.519482	5.44586	27.9363	1.25e-07	3.21e-06
ENSG00000143549	TPM3	9.57373	9.5356	9.52826	9.93791	9.99805	9.96654	10.0098	9.97999	10.0028	0.436748	9.85132	27.9155	1.27e-07	3.23e-06
ENSG00000163626	COX18	3.24267	3.43182	3.19181	3.92216	3.75687	3.96244	3.96612	3.88576	3.98456	0.623632	3.73582	27.9156	1.27e-07	3.23e-06
ENSG00000130589	HELZ2	4.31417	4.40192	4.47403	5.16625	5.03398	5.08088	4.86735	4.84505	4.97345	0.601791	4.8252	27.8749	1.29e-07	3.29e-06
ENSG00000225159	NPM1P39	4.71494	4.57457	4.65199	5.13334	5.16722	5.08088	5.3698	5.36584	5.27734	0.589226	5.06595	27.8768	1.29e-07	3.29e-06
ENSG00000196227	FAM217B	3.81661	3.65035	3.6069	4.29665	4.16314	4.2631	4.24896	4.33974	4.30205	0.577489	4.1024	27.8626	1.3e-07	3.3e-06
ENSG00000196284	SUPT3H	2.10279	1.82019	1.96461	2.58962	2.85196	2.63811	2.62377	2.67948	2.72316	0.726209	2.48441	27.8116	1.34e-07	3.38e-06
ENSG00000138798	EGF	1.26156	1.2437	1.50103	2.08588	1.9584	2.18795	2.10568	2.26464	2.1095	0.791937	1.9057	27.8028	1.34e-07	3.4e-06
ENSG00000158715	SLC45A3	2.83416	3.00428	2.64187	3.71745	3.53304	3.62183	3.45814	3.69233	3.34669	0.736713	3.36266	27.7685	1.37e-07	3.45e-06
ENSG00000101384	JAG1	4.41203	4.74394	4.51386	5.1182	5.13232	5.13104	5.5199	5.50384	5.49804	0.766846	5.11647	27.759	1.37e-07	3.46e-06
ENSG00000114978	MOB1A	3.96506	4.30425	4.3214	4.8321	4.81983	4.73875	4.92802	4.82532	4.75848	0.613226	4.64175	27.7623	1.37e-07	3.46e-06
ENSG00000268001	CARD8-AS1	-1.20342	-0.729425	-1.15462	-0.0196649	0.0331122	0.286179	0.373216	0.278576	0.134184	1.26324	-0.110513	27.7476	1.38e-07	3.48e-06
ENSG00000037474	NSUN2	7.1556	7.19997	7.18053	7.75678	7.77133	7.68556	7.59651	7.61385	7.57615	0.490087	7.52319	27.7414	1.39e-07	3.49e-06
ENSG00000152359	POC5	1.77519	1.69174	1.3991	2.34874	2.28936	2.55862	2.60408	2.42533	2.33471	0.808993	2.21133	27.6635	1.44e-07	3.62e-06
ENSG00000115091	ACTR3	6.89503	6.97948	6.89061	7.35098	7.40893	7.4907	7.807	7.79926	7.79003	0.69873	7.42339	27.5859	1.5e-07	3.75e-06
ENSG00000065559	MAP2K4	4.57406	4.4934	4.52196	4.96452	5.05721	5.12861	5.43326	5.4142	5.41121	0.717849	5.04536	27.4558	1.61e-07	4e-06
ENSG00000146223	RPL7L1	8.0862	8.02584	7.99573	8.4405	8.46001	8.43907	8.62022	8.56715	8.56789	0.481225	8.37432	27.4312	1.63e-07	4.04e-06
ENSG00000100036	SLC35E4	2.38776	2.36057	2.26426	3.37537	3.03227	3.39025	2.99664	2.88791	3.16856	0.820829	2.9304	27.4068	1.65e-07	4.09e-06
ENSG00000151576	QTRT2	5.36705	5.42361	5.41726	5.84853	5.91725	5.803	6.11404	6.11542	6.04075	0.5759	5.81088	27.3824	1.67e-07	4.11e-06
ENSG00000171490	RSL1D1	7.52256	7.54039	7.53043	8.01775	8.08906	7.89292	8.34127	8.34253	8.27739	0.639145	7.98695	27.3887	1.66e-07	4.11e-06
ENSG00000257576	HSPD1P4	0.00204727	0.736475	0.585317	1.52417	1.42208	1.33057	1.98903	1.85375	1.84252	1.22617	1.37846	27.3829	1.67e-07	4.11e-06
ENSG00000008282	SYPL1	6.1692	6.14605	6.1297	6.56387	6.52337	6.67134	6.73496	6.78671	6.68249	0.515156	6.51125	27.3725	1.68e-07	4.13e-06
ENSG00000164815	ORC5	4.4384	4.56726	4.51792	4.90169	5.0905	5.09088	5.39509	5.33128	5.21913	0.672627	4.98959	27.3429	1.7e-07	4.18e-06
ENSG00000257839	PHLDA1-DT	-2.21024	-3.03734	-2.22969	-0.602423	-0.252981	-0.963779	-1.05781	-0.864608	-0.749845	1.98185	-1.1018	27.346	1.7e-07	4.18e-06
ENSG00000164346	NSA2	5.79766	5.90226	5.85281	6.34965	6.34758	6.32998	6.33251	6.25399	6.30712	0.469176	6.18049	27.2545	1.78e-07	4.37e-06
ENSG00000127418	FGFRL1	6.20761	6.2267	6.20882	6.98081	6.90794	6.88097	6.63478	6.64163	6.69795	0.583156	6.62788	27.2129	1.82e-07	4.45e-06
ENSG00000120949	TNFRSF8	-0.352409	0.268815	0.0993812	1.31647	1.22161	1.37492	2.32006	2.42008	2.64414	2.01154	1.58363	27.1381	1.89e-07	4.62e-06
ENSG00000120805	ARL1	5.25036	5.20414	5.16116	5.5527	5.72705	5.71084	5.84917	5.79107	5.81842	0.539377	5.58641	27.1343	1.9e-07	4.63e-06
ENSG00000172346	CSDC2	-1.27778	-1.46405	-0.73852	0.284349	-0.218244	0.262765	0.0628207	0.453318	0.260667	1.40872	-0.121161	27.1286	1.9e-07	4.64e-06
ENSG00000131941	RHPN2	4.71614	4.67992	4.6284	5.10694	5.13652	5.17246	5.18908	5.21628	5.2074	0.497236	5.02462	27.1094	1.92e-07	4.68e-06
ENSG00000151729	SLC25A4	5.87423	5.83947	5.83122	6.4241	6.45406	6.40006	6.24817	6.32	6.25155	0.503964	6.20287	27.05	1.98e-07	4.8e-06
ENSG00000127870	RNF6	3.19535	3.29702	3.1153	3.77345	3.89417	4.06921	3.75014	3.853	3.74048	0.649283	3.66655	27.0098	2.02e-07	4.89e-06
ENSG00000100664	EIF5	6.97576	6.97902	6.91851	7.42554	7.44206	7.39971	7.81599	7.76704	7.67352	0.639511	7.41408	26.9707	2.07e-07	4.98e-06
ENSG00000065154	OAT	4.84765	4.79487	4.87087	5.32874	5.30718	5.2806	5.30798	5.35074	5.34583	0.482834	5.17684	26.9143	2.13e-07	5.13e-06
ENSG00000153310	CYRIB	5.82345	5.84854	5.90332	6.39366	6.4517	6.32363	6.36615	6.24733	6.29516	0.489314	6.20251	26.8942	2.15e-07	5.17e-06
ENSG00000300056	ENSG00000300056	-3.5528	-3.61362	-3.56511	-1.77465	-1.43911	-1.34033	-0.154817	0.255167	-0.877295	3.68668	-1.1844	26.8718	2.17e-07	5.22e-06
ENSG00000044574	HSPA5	9.76256	9.78872	9.79545	10.174	10.256	10.1256	10.3564	10.3555	10.3342	0.487448	10.1248	26.7779	2.28e-07	5.47e-06
ENSG00000128340	RAC2	-4.58787	-4.58787	-4.58787	-1.36334	-3.01875	-1.07871	-1.99697	-2.07815	-2.81458	6.47927	-2.33963	26.7621	2.3e-07	5.51e-06
ENSG00000105767	CADM4	1.74734	1.70954	1.44529	2.81191	2.44917	2.76018	2.36171	2.32209	2.41171	0.901821	2.29302	26.744	2.32e-07	5.56e-06
ENSG00000111877	MCM9	3.67102	3.50501	3.59157	4.10464	4.1499	4.1075	4.14204	4.17019	4.11378	0.542669	3.97286	26.6588	2.43e-07	5.79e-06
ENSG00000095209	TMEM38B	4.1869	3.99329	3.99634	4.60059	4.53808	4.7281	4.63112	4.61268	4.56213	0.553208	4.45196	26.6384	2.45e-07	5.85e-06
ENSG00000111802	TDP2	4.78282	4.81351	4.71933	5.13492	5.31758	5.33494	5.60907	5.5057	5.48676	0.634408	5.22429	26.6095	2.49e-07	5.92e-06
ENSG00000168993	CPLX1	2.2155	2.142	2.33344	3.02513	2.85604	2.96991	2.90705	3.05312	2.71766	0.700046	2.73046	26.6093	2.49e-07	5.92e-06
ENSG00000215210	RBMXP2	2.33883	2.24935	2.41114	3.001	3.17631	2.86108	2.97763	2.93655	3.06835	0.676347	2.81555	26.5843	2.52e-07	5.99e-06
ENSG00000066735	KIF26A	6.61583	6.74389	6.7398	7.31649	7.13461	7.19247	7.08835	7.19905	7.19137	0.487873	7.0438	26.5643	2.55e-07	6.04e-06
ENSG00000198626	RYR2	0.819608	1.39439	0.645911	2.07271	2.11644	2.17546	3.20712	3.19828	3.02445	1.75104	2.33877	26.4981	2.64e-07	6.23e-06
ENSG00000118007	STAG1	4.879	4.9905	5.01662	5.42318	5.36202	5.45924	5.59417	5.55566	5.63206	0.544575	5.3479	26.4302	2.73e-07	6.44e-06
ENSG00000130021	PUDP	4.8156	4.88183	4.86451	5.22916	5.31165	5.37166	5.42135	5.40293	5.43823	0.510322	5.21343	26.4257	2.74e-07	6.45e-06
ENSG00000104691	UBXN8	4.55812	4.57214	4.47542	5.10936	5.15319	5.15746	4.99856	4.96082	4.99977	0.530394	4.90961	26.3893	2.79e-07	6.55e-06
ENSG00000115827	DCAF17	2.85171	2.98248	2.84936	3.45871	3.35993	3.66041	3.52775	3.52869	3.55852	0.624777	3.33942	26.3855	2.8e-07	6.56e-06
ENSG00000169692	AGPAT2	6.20462	6.19506	6.18179	7.06424	6.9695	7.02362	6.63448	6.68498	6.6633	0.658009	6.66379	26.3496	2.85e-07	6.67e-06
ENSG00000115520	COQ10B	3.16058	2.94164	2.83642	3.60763	3.53813	3.71535	3.52775	3.62544	3.7486	0.646037	3.44505	26.3227	2.89e-07	6.75e-06
ENSG00000115762	PLEKHB2	6.9976	7.05039	6.93934	7.51297	7.4978	7.52831	7.48769	7.37937	7.37606	0.468685	7.32512	26.3038	2.92e-07	6.81e-06
ENSG00000178980	SELENOW	5.31266	5.34534	5.21714	6.26789	6.28275	6.23278	5.80887	5.76593	5.8708	0.763656	5.8434	26.284	2.95e-07	6.87e-06
ENSG00000196950	SLC39A10	6.07291	6.08172	6.10743	6.54015	6.52562	6.6447	6.50836	6.53784	6.51533	0.458929	6.4088	26.2379	3.02e-07	7.03e-06
ENSG00000145287	PLAC8	6.07758	5.94844	5.98719	6.60045	6.62103	6.6613	6.43571	6.43417	6.41901	0.527153	6.37704	26.2083	3.07e-07	7.13e-06
ENSG00000111348	ARHGDIB	0.386064	0.961165	0.263071	1.31647	1.53838	1.814	1.96607	2.08378	2.17522	1.29426	1.5304	26.1942	3.09e-07	7.17e-06
ENSG00000116199	FAM20B	6.74555	6.83895	6.75334	7.17793	7.23399	7.18218	7.39366	7.43382	7.31291	0.512712	7.14103	26.1624	3.14e-07	7.28e-06
ENSG00000115484	CCT4	5.84223	5.80573	5.89503	6.46876	6.29294	6.30261	6.28575	6.2756	6.35841	0.484465	6.18823	26.1291	3.19e-07	7.4e-06
ENSG00000137876	RSL24D1	5.08126	5.05719	5.06365	5.41538	5.5176	5.59375	5.65884	5.65571	5.68096	0.522961	5.43592	25.9938	3.43e-07	7.9e-06
ENSG00000163694	RBM47	4.77019	4.76963	4.82356	5.30852	5.21646	5.33002	5.67957	5.70243	5.60251	0.698833	5.28875	25.9948	3.42e-07	7.9e-06
ENSG00000078140	UBE2K	6.12885	6.13044	6.10113	6.50964	6.55258	6.54783	6.78037	6.66347	6.68813	0.506752	6.47687	25.9556	3.49e-07	8.04e-06
ENSG00000101367	MAPRE1	5.66377	5.61523	5.56775	6.12692	6.09351	5.97764	6.14504	6.10072	6.09003	0.474156	5.94863	25.94	3.52e-07	8.09e-06
ENSG00000105887	MTPN	3.76662	3.81358	3.82786	4.35219	4.27557	4.40487	4.83287	4.71274	4.74366	0.768023	4.35626	25.8513	3.69e-07	8.44e-06
ENSG00000104856	RELB	3.50354	3.42375	3.60943	4.52648	4.37134	4.58086	3.93098	4.27429	4.11168	0.805273	4.09587	25.7675	3.85e-07	8.8e-06
ENSG00000147912	FBXO10	1.62002	1.42704	1.60643	2.46918	2.76782	2.51469	2.14028	2.19253	2.4977	0.901411	2.20509	25.7482	3.89e-07	8.88e-06
ENSG00000106991	ENG	5.09329	5.12426	5.15422	5.82468	5.71418	5.69069	6.32876	6.42633	6.3886	0.974512	5.84011	25.7212	3.94e-07	8.98e-06
ENSG00000140105	WARS1	5.98769	5.86054	5.9611	6.4653	6.48568	6.46754	6.97407	6.99757	6.98181	0.814103	6.52738	25.7226	3.94e-07	8.98e-06
ENSG00000173744	AGFG1	5.43919	5.41617	5.43239	5.82566	5.905	5.91049	6.12531	6.24251	6.16018	0.607472	5.86096	25.7229	3.94e-07	8.98e-06
ENSG00000197223	C1D	2.48653	2.82807	2.54444	3.25814	3.2276	3.5292	3.34403	3.22262	3.32151	0.695987	3.12506	25.7171	3.95e-07	8.99e-06
ENSG00000250859	HNRNPKP1	2.81193	2.71804	3.05699	3.53269	3.69215	3.56314	3.63597	3.48659	3.33954	0.680609	3.35416	25.6782	4.03e-07	9.16e-06
ENSG00000293037	ENSG00000293037	-4.58787	-4.58787	-4.58787	-2.66857	-3.01875	-2.07165	-2.12261	-1.75931	-2.81458	5.9418	-2.76143	25.6634	4.06e-07	9.22e-06
ENSG00000163710	PCOLCE2	5.82512	5.8145	5.82086	6.35577	6.38901	6.3349	6.26356	6.23467	6.19128	0.476828	6.1546	25.5713	4.26e-07	9.64e-06
ENSG00000186847	KRT14	-4.58787	-2.62667	-2.55386	-1.43675	-1.28738	-0.963779	-1.18911	-0.544012	-0.749845	2.41498	-1.41038	25.5491	4.31e-07	9.74e-06
ENSG00000090539	CHRD	-0.478282	-0.778213	-0.73852	0.189955	0.247104	0.915972	0.910944	0.663522	0.98359	1.39959	0.357295	25.5223	4.37e-07	9.86e-06
ENSG00000109971	HSPA8	11.4335	11.4297	11.4132	11.8266	11.9005	11.8592	12.2309	12.2164	12.2093	0.626167	11.8715	25.5154	4.39e-07	9.89e-06
ENSG00000183607	GKN2	-1.94493	-3.03734	-1.22522	0.765485	0.295986	0.854649	-0.188772	-0.352034	-0.157866	2.36125	-0.1412	25.5084	4.4e-07	9.91e-06
ENSG00000213281	NRAS	6.38151	6.31293	6.27106	6.85428	6.84568	7.02449	7.53136	7.47857	7.50146	0.915256	6.99186	25.4944	4.44e-07	9.98e-06
ENSG00000130956	HABP4	3.6233	3.89169	3.70982	4.70774	4.59413	4.55699	4.28651	4.30454	4.25534	0.717419	4.26049	25.4819	4.47e-07	1e-05
ENSG00000138594	TMOD3	5.84825	5.867	5.86507	6.25593	6.33265	6.30548	6.61554	6.60853	6.60264	0.602033	6.28781	25.4609	4.51e-07	1.01e-05
ENSG00000164695	CHMP4C	3.04331	2.8996	3.21199	3.62126	3.61719	3.62642	3.64804	3.65704	3.74048	0.597485	3.4798	25.4708	4.49e-07	1.01e-05
ENSG00000293339	ENSG00000293339	1.70935	1.36099	1.62661	2.21732	2.25269	2.31859	2.42482	2.25287	2.27601	0.727995	2.08979	25.4462	4.55e-07	1.02e-05
ENSG00000010270	STARD3NL	3.63094	3.83604	3.78584	4.2196	4.43955	4.32092	4.36468	4.25819	4.27233	0.561878	4.15065	25.4171	4.62e-07	1.03e-05
ENSG00000124216	SNAI1	4.62852	4.61055	4.64705	5.1491	5.06604	5.18886	5.10223	5.08219	5.07163	0.482766	4.96731	25.3951	4.67e-07	1.05e-05
ENSG00000183527	PSMG1	6.66286	6.66482	6.65665	7.08488	7.06382	7.02731	7.24341	7.17723	7.18515	0.470976	6.99178	25.3522	4.78e-07	1.07e-05
ENSG00000105329	TGFB1	5.14935	5.1756	5.19196	5.8286	5.81353	5.78051	5.52777	5.63545	5.64009	0.536742	5.55104	25.3263	4.84e-07	1.08e-05
ENSG00000114480	GBE1	5.33623	5.33749	5.2088	5.75993	5.75409	5.6747	5.94035	5.96573	5.91895	0.544679	5.68013	25.3346	4.82e-07	1.08e-05
ENSG00000120833	SOCS2	3.28526	3.43182	3.05699	4.04691	3.81463	3.8917	4.39937	4.45724	4.50097	0.947327	3.95918	25.3333	4.82e-07	1.08e-05
ENSG00000167881	SRP68	7.5205	7.49684	7.57996	7.98804	8.01241	7.96994	7.91822	7.95323	7.93505	0.430409	7.83349	25.2526	5.03e-07	1.11e-05
ENSG00000145675	PIK3R1	-3.5528	-4.58787	-4.58787	-1.68247	-2.60571	-2.33187	-1.58164	-1.21072	-1.17193	4.03363	-2.1415	25.2498	5.04e-07	1.12e-05
ENSG00000114737	CISH	2.35737	1.97541	2.17113	2.81191	2.74599	2.94069	2.89088	2.96929	2.80847	0.693569	2.66891	25.1587	5.28e-07	1.17e-05
ENSG00000112335	SNX3	6.66875	6.66624	6.65665	7.02761	7.1228	7.11123	7.10027	7.07919	7.15468	0.436022	6.96863	25.1283	5.36e-07	1.18e-05
ENSG00000129292	PHF20L1	3.95291	4.07281	3.98466	4.49227	4.49294	4.44833	4.52645	4.55154	4.65143	0.52458	4.37403	25.113	5.41e-07	1.19e-05
ENSG00000215717	TMEM167B	4.39268	4.29101	4.27259	4.67217	4.87114	4.90299	4.87969	4.96714	4.83672	0.539036	4.69976	25.0766	5.51e-07	1.21e-05
ENSG00000108018	SORCS1	-0.129478	-0.729425	-0.335648	2.52342	2.71487	2.53926	1.21354	1.07798	0.787414	2.45764	1.57084	24.9883	5.77e-07	1.27e-05
ENSG00000109171	SLAIN2	4.47848	4.62937	4.50025	4.96541	4.98265	5.00265	5.1899	5.15435	5.11204	0.533308	4.91378	24.9612	5.85e-07	1.28e-05
ENSG00000118217	ATF6	6.49507	6.48334	6.55301	6.91086	6.9984	6.85845	7.05406	7.02853	6.9798	0.462608	6.83494	24.9681	5.83e-07	1.28e-05
ENSG00000153015	CWC27	3.43535	3.18694	3.41423	3.83127	4.08358	3.89931	4.05767	3.91406	3.91653	0.605819	3.77872	24.9703	5.82e-07	1.28e-05
ENSG00000120669	SOHLH2	3.57658	3.48188	3.48227	4.00594	3.99569	4.08432	4.01169	4.09306	4.03852	0.526193	3.88423	24.8472	6.21e-07	1.35e-05
ENSG00000144381	HSPD1	9.30484	9.28933	9.30098	9.78328	9.79583	9.79046	10.3105	10.259	10.2669	0.756668	9.84407	24.8496	6.2e-07	1.35e-05
ENSG00000132669	RIN2	4.25276	4.32027	4.31363	4.83892	4.79772	4.98308	4.80941	4.84014	4.67291	0.531976	4.6706	24.8239	6.28e-07	1.36e-05
ENSG00000140280	LYSMD2	3.86925	3.9415	3.81032	4.6256	4.61956	4.5606	4.42766	4.34945	4.27795	0.610022	4.30756	24.8029	6.35e-07	1.38e-05
ENSG00000183943	PRKX	4.98715	4.91098	4.9491	5.44634	5.57319	5.48476	6.09696	6.04294	5.98801	0.849332	5.56649	24.7928	6.38e-07	1.38e-05
ENSG00000196092	PAX5	-4.58787	-4.58787	-4.58787	-2.66857	-2.60571	-1.49139	-2.99816	-1.49834	-2.37764	6.16647	-2.59219	24.8013	6.36e-07	1.38e-05
ENSG00000143753	DEGS1	8.54558	8.51688	8.5342	9.00058	9.05796	8.99074	8.93452	8.90386	8.90551	0.434406	8.83585	24.7835	6.41e-07	1.39e-05
ENSG00000112144	CILK1	3.03949	3.04341	3.04204	3.72589	3.71704	3.88597	3.7479	3.52625	3.47291	0.647691	3.50197	24.7626	6.48e-07	1.4e-05
ENSG00000169895	SYAP1	5.0738	4.83293	4.99834	5.39106	5.4571	5.49233	5.76409	5.78903	5.74187	0.643789	5.43067	24.7249	6.61e-07	1.42e-05
ENSG00000126524	SBDS	6.01228	6.10964	6.10519	6.4697	6.504	6.46818	6.69275	6.63343	6.66723	0.499319	6.4276	24.7073	6.67e-07	1.44e-05
ENSG00000085552	IGSF9	2.26872	2.16799	2.09348	2.86633	2.75913	2.72634	2.91506	2.75236	2.82903	0.635455	2.62837	24.6489	6.88e-07	1.48e-05
ENSG00000175697	GPR156	-3.5528	-1.54616	-2.09137	-0.520328	-0.610204	-0.274392	-0.259178	0.182569	-0.690107	2.04381	-0.717228	24.6404	6.91e-07	1.48e-05
ENSG00000090520	DNAJB11	5.08775	5.13336	5.14288	5.67263	5.5843	5.4746	5.64806	5.56758	5.67031	0.483348	5.46082	24.6148	7e-07	1.5e-05
ENSG00000170500	LONRF2	-0.823344	-1.82494	-1.96516	0.214138	-0.610204	0.376211	0.373216	0.571752	0.260667	1.8041	-0.13255	24.5943	7.08e-07	1.51e-05
ENSG00000101098	RIMS4	3.3045	2.96406	3.07179	3.74883	3.66914	3.74944	3.75238	3.68797	3.65669	0.594037	3.54008	24.5824	7.12e-07	1.52e-05
ENSG00000197771	MCMBP	7.17511	7.17876	7.21009	7.55218	7.57812	7.59061	7.75673	7.78362	7.75822	0.485183	7.52888	24.5485	7.25e-07	1.54e-05
ENSG00000137338	PGBD1	3.23266	3.04341	3.18502	3.72378	3.68069	3.60097	3.76574	3.81347	3.7647	0.572984	3.56018	24.5346	7.3e-07	1.55e-05
ENSG00000155096	AZIN1	6.93519	6.87834	6.90927	7.31072	7.37219	7.38877	7.76645	7.75235	7.7126	0.656027	7.37634	24.5348	7.3e-07	1.55e-05
ENSG00000006327	TNFRSF12A	6.96874	6.96125	6.95913	8.89736	8.76808	8.87082	7.7538	7.81235	7.81247	1.45115	8.07133	24.4976	7.44e-07	1.58e-05
ENSG00000205363	INSYN1	-2.53559	-1.82494	-0.961443	-0.168049	0.247104	-0.1435	1.09153	1.25363	0.584689	2.36336	0.147428	24.4117	7.78e-07	1.64e-05
ENSG00000115866	DARS1	4.84983	4.75684	4.86663	5.2816	5.37771	5.27476	5.54401	5.69212	5.76206	0.676747	5.30915	24.3672	7.96e-07	1.68e-05
ENSG00000117148	ACTL8	2.01986	2.142	2.2898	2.88904	3.08885	2.91464	3.8909	3.69233	3.84008	1.30124	3.13071	24.3715	7.94e-07	1.68e-05
ENSG00000172239	PAIP1	3.91378	4.05899	4.12253	4.58676	4.58555	4.43791	4.75127	4.88849	4.65575	0.624648	4.47854	24.3112	8.2e-07	1.72e-05
ENSG00000168685	IL7R	-0.716056	0.00613244	0.0404133	1.16342	1.43305	1.2848	3.07742	2.98716	3.05968	2.65567	1.94291	24.2938	8.27e-07	1.73e-05
ENSG00000171729	TMEM51	2.51434	2.29133	2.50136	3.49617	3.46253	3.29824	2.78115	3.26718	3.25088	0.84341	3.04845	24.2934	8.27e-07	1.73e-05
ENSG00000090054	SPTLC1	5.58728	5.59502	5.5139	5.91827	5.93328	6.23542	6.24738	6.22379	6.25393	0.577185	5.97486	24.2639	8.4e-07	1.76e-05
ENSG00000137124	ALDH1B1	6.69359	6.71167	6.63782	7.41677	7.39006	7.3692	7.08769	7.11072	7.08212	0.569451	7.08464	24.2594	8.42e-07	1.76e-05
ENSG00000088833	NSFL1C	6.51379	6.55494	6.61179	7.43746	7.4746	7.40172	7.0231	7.00438	7.03726	0.68449	7.05088	24.1957	8.7e-07	1.82e-05
ENSG00000106682	EIF4H	9.00051	9.02283	8.98826	9.52164	9.50951	9.52157	9.33727	9.3917	9.39838	0.44465	9.31502	24.1693	8.82e-07	1.84e-05
ENSG00000115364	MRPL19	1.30041	1.33828	1.1707	2.04601	1.87238	1.95215	2.35583	2.10357	2.01395	0.80354	1.84663	24.1451	8.93e-07	1.86e-05
ENSG00000182481	KPNA2	9.40447	9.41587	9.43324	9.95866	10.0064	9.95232	9.8075	9.80001	9.7654	0.46685	9.74526	24.1382	8.97e-07	1.87e-05
ENSG00000104695	PPP2CB	6.80333	6.83541	6.86774	7.24218	7.23692	7.32608	7.23743	7.25655	7.25211	0.423285	7.13115	24.1229	9.04e-07	1.88e-05
ENSG00000265354	TIMM23	7.27257	7.35152	7.33611	7.81859	7.89795	7.83518	7.70364	7.67728	7.73644	0.459939	7.64271	24.0935	9.18e-07	1.91e-05
ENSG00000196083	IL1RAP	4.94281	4.94801	4.76785	5.28802	5.41138	5.40211	5.74061	5.74034	5.73847	0.677765	5.3734	24.0759	9.26e-07	1.92e-05
ENSG00000156304	SCAF4	5.28064	5.27833	5.27024	5.85479	5.87515	5.76236	5.67663	5.71375	5.66675	0.48475	5.61658	24.0264	9.5e-07	1.97e-05
ENSG00000120705	ETF1	7.61648	7.57525	7.63144	8.03196	8.17263	8.09391	8.60265	8.60468	8.58244	0.762013	8.15765	24.0062	9.6e-07	1.99e-05
ENSG00000135363	LMO2	-4.58787	-4.58787	-4.58787	-3.07442	-2.60571	-1.85127	-1.41162	-2.33809	-2.81458	6.06603	-2.67255	23.8527	1.04e-06	2.15e-05
ENSG00000121274	TENT4B	2.82086	2.76986	2.71911	3.25523	3.51766	3.53409	3.5791	3.47651	3.18061	0.664933	3.24351	23.7532	1.1e-06	2.25e-05
ENSG00000163485	ADORA1	-4.58787	-1.82494	-1.96516	-0.480969	-0.802634	0.00500069	0.373216	0.749803	0.458397	2.77889	-0.319011	23.6666	1.15e-06	2.35e-05
ENSG00000088727	KIF9	2.04296	2.06803	2.22508	3.001	2.80629	2.68731	2.73209	2.66623	2.77707	0.673618	2.59265	23.6527	1.15e-06	2.37e-05
ENSG00000115761	NOL10	4.20578	4.13012	4.35808	4.67761	4.78172	4.66364	4.98529	5.04001	4.9289	0.620171	4.67519	23.6461	1.16e-06	2.37e-05
ENSG00000140479	PCSK6	4.92324	4.90133	4.91051	5.33771	5.29596	5.37166	5.48331	5.39358	5.37671	0.466416	5.23842	23.6366	1.16e-06	2.38e-05
ENSG00000162623	TYW3	4.92428	4.91674	4.82137	5.30219	5.37416	5.28279	5.48129	5.34797	5.43404	0.484164	5.22809	23.6206	1.17e-06	2.4e-05
ENSG00000091127	PUS7	5.42827	5.49142	5.5247	5.91965	6.00853	5.95271	6.44092	6.34308	6.43461	0.719281	5.99863	23.5784	1.2e-06	2.45e-05
ENSG00000110851	PRDM4	4.01068	4.2291	4.02324	4.47236	4.60629	4.6614	4.69885	4.75508	4.8743	0.592417	4.51152	23.551	1.22e-06	2.48e-05
ENSG00000250317	SMIM20	2.88191	2.63197	2.70968	3.40456	3.23389	3.25736	3.44159	3.55769	3.671	0.693692	3.23983	23.4757	1.27e-06	2.56e-05
ENSG00000056097	ZFR	6.43995	6.32993	6.33265	6.78709	6.82058	6.81232	7.21285	7.16452	7.17766	0.640059	6.82482	23.4576	1.28e-06	2.58e-05
ENSG00000275674	ENSG00000275674	2.57369	2.65971	2.6219	3.16506	3.06437	3.20918	3.1874	3.32173	3.33595	0.600241	3.04366	23.4625	1.27e-06	2.58e-05
ENSG00000136933	RABEPK	5.83177	5.7347	5.81812	6.75139	6.7712	6.78767	6.27528	6.25289	6.3158	0.7515	6.33687	23.4178	1.3e-06	2.63e-05
ENSG00000125534	PPDPF	5.98322	5.95871	6.02333	6.59672	6.4072	6.43714	6.32501	6.47305	6.49617	0.469904	6.31809	23.3886	1.32e-06	2.66e-05
ENSG00000117174	ZNHIT6	3.99497	3.95089	4.13315	4.55279	4.64336	4.43136	5.01729	4.93527	4.80463	0.718453	4.54372	23.3496	1.35e-06	2.72e-05
ENSG00000166012	TAF1D	5.89607	5.85555	5.85655	6.36829	6.40442	6.52372	6.27645	6.26649	6.26057	0.484046	6.20927	23.3406	1.36e-06	2.72e-05
ENSG00000178381	ZFAND2A	4.80212	4.84506	4.74032	5.79893	5.71081	5.69069	5.24658	5.35418	5.25377	0.731907	5.32252	23.3411	1.36e-06	2.72e-05
ENSG00000169018	FEM1B	4.75045	4.5697	4.62715	5.16237	5.05277	5.24445	5.56071	5.58059	5.65384	0.743728	5.1861	23.2982	1.39e-06	2.78e-05
ENSG00000163293	NIPAL1	0.90612	0.683412	0.915726	1.59034	1.74614	1.59713	1.40782	1.73185	1.58887	0.791281	1.40009	23.117	1.52e-06	3.03e-05
ENSG00000112167	SAYSD1	2.30738	2.43737	2.44564	3.08208	2.88428	3.00208	3.2362	3.16097	3.50841	0.763715	2.94654	23.0714	1.56e-06	3.1e-05
ENSG00000185480	PARPBP	3.31086	3.29996	3.33363	3.78762	3.83131	3.81329	4.17746	4.17019	4.24581	0.704035	3.81869	23.0466	1.58e-06	3.14e-05
ENSG00000070501	POLB	4.4413	4.41011	4.49888	5.04425	5.14321	5.04358	4.82863	4.85287	4.9607	0.533536	4.82656	23.028	1.6e-06	3.17e-05
ENSG00000083635	NUFIP1	2.72416	2.73117	2.33344	3.17434	3.24638	3.20611	3.68601	3.60011	3.56773	0.823768	3.20288	23.0195	1.6e-06	3.18e-05
ENSG00000129128	SPCS3	4.97219	4.93198	4.91565	5.31343	5.30345	5.57545	5.68134	5.68502	5.74322	0.621333	5.38214	22.9798	1.64e-06	3.24e-05
ENSG00000214881	TMEM14DP	2.98488	3.04341	3.10454	3.72378	3.5633	3.74734	3.55621	3.45868	3.7647	0.596886	3.46769	22.9269	1.68e-06	3.32e-05
ENSG00000141219	MTNAP1	3.16058	3.25823	3.10454	3.78762	3.77638	3.53409	4.03026	3.86464	4.04513	0.6752	3.65785	22.9145	1.69e-06	3.34e-05
ENSG00000134001	EIF2S1	6.64001	6.61107	6.63906	6.98608	7.10598	7.02775	7.37852	7.36987	7.37453	0.587168	7.04669	22.8747	1.73e-06	3.4e-05
ENSG00000204514	ZNF814	2.58946	2.81989	2.84506	3.41504	3.37138	3.38212	3.17744	3.377	3.3644	0.596459	3.17801	22.8655	1.74e-06	3.41e-05
ENSG00000116017	ARID3A	3.65862	3.39103	3.51513	4.11913	4.08184	3.993	4.07028	4.25081	4.00277	0.565641	3.92463	22.7498	1.85e-06	3.61e-05
ENSG00000139726	DENR	5.85424	5.89109	5.86454	6.2239	6.38054	6.31227	6.68954	6.68361	6.69655	0.641264	6.32731	22.7473	1.85e-06	3.62e-05
ENSG00000101901	ALG13	4.04158	3.96763	3.83221	4.46985	4.38693	4.45867	4.42205	4.43787	4.49937	0.497428	4.29894	22.7187	1.88e-06	3.67e-05
ENSG00000155918	RAET1L	-3.5528	-2.30737	-4.58787	-0.735051	-1.02474	-1.66014	-0.674334	0.0253995	-1.01711	2.94136	-1.20306	22.6851	1.91e-06	3.72e-05
ENSG00000145781	COMMD10	2.80294	2.73552	2.85365	3.25232	3.24638	3.47928	3.43045	3.44582	3.38538	0.580909	3.20807	22.6559	1.94e-06	3.77e-05
ENSG00000179776	CDH5	-1.94493	-2.30737	-2.55386	-0.520328	0.196508	-0.274392	-1.25953	-0.864608	-0.0413119	2.0848	-0.784462	22.6082	1.99e-06	3.86e-05
ENSG00000068697	LAPTM4A	7.46369	7.42019	7.36887	7.78947	7.86175	7.82934	7.79876	7.80456	7.87003	0.407937	7.70241	22.5692	2.03e-06	3.92e-05
ENSG00000130826	DKC1	8.26165	8.25867	8.2586	8.69266	8.73744	8.677	8.62382	8.61678	8.63429	0.404722	8.54162	22.5437	2.05e-06	3.97e-05
ENSG00000171067	C11orf24	5.67058	5.6531	5.65817	6.28226	6.1888	6.23692	6.04495	6.05019	6.03634	0.483245	5.99976	22.5257	2.07e-06	4e-05
ENSG00000133872	SARAF	6.81484	6.82931	6.69718	7.1143	7.14715	7.23615	7.32576	7.34791	7.36994	0.47863	7.11763	22.5143	2.09e-06	4.02e-05
ENSG00000109466	KLHL2	3.08841	3.13519	3.00396	3.59387	3.5583	3.55352	3.61644	3.78515	3.65093	0.553505	3.46712	22.5052	2.1e-06	4.04e-05
ENSG00000134697	GNL2	5.34089	5.30858	5.44381	5.89555	5.91236	5.81713	6.46807	6.39822	6.40837	0.811302	5.95316	22.4964	2.11e-06	4.05e-05
ENSG00000138035	PNPT1	5.90397	5.90516	5.806	6.2621	6.37094	6.22485	6.5674	6.45583	6.36018	0.505936	6.22847	22.479	2.12e-06	4.08e-05
ENSG00000134901	POGLUT2	4.56079	4.51	4.43736	5.18396	5.16886	5.1638	4.97766	4.83027	4.98266	0.554442	4.89518	22.4629	2.14e-06	4.11e-05
ENSG00000299449	ENSG00000299449	1.42284	1.04769	1.44529	2.14368	2.1567	1.93744	2.10568	2.30509	1.89222	0.79355	1.8817	22.4175	2.19e-06	4.2e-05
ENSG00000102362	SYTL4	-1.20342	-2.04608	-2.97263	-0.137126	0.343266	-0.496109	1.62861	1.45198	1.95904	3.17092	0.558802	22.412	2.2e-06	4.21e-05
ENSG00000158966	CACHD1	2.19503	2.15505	2.27709	2.63958	3.03947	2.78093	3.26471	3.25838	3.02445	0.814306	2.79631	22.3735	2.24e-06	4.28e-05
ENSG00000084628	NKAIN1	-2.95634	-3.03734	-3.56511	-1.77465	-1.15009	-1.85127	-0.493706	-0.765516	-0.423702	2.68624	-1.42054	22.3513	2.27e-06	4.33e-05
ENSG00000143367	TUFT1	5.69751	5.80521	5.73804	6.90993	6.84517	6.90101	6.23102	6.33193	6.26577	0.86609	6.37815	22.3463	2.28e-06	4.33e-05
ENSG00000267409	ENSG00000267409	-4.58787	-3.61362	-4.58787	-2.35219	-2.28498	-2.64959	-1.99697	-1.66698	-2.04273	3.50626	-2.54958	22.3232	2.3e-06	4.38e-05
ENSG00000132357	CARD6	-3.5528	-3.61362	-3.56511	-1.68247	-2.60571	-1.2036	-0.259178	-0.0310402	-0.329542	3.60946	-1.26304	22.248	2.4e-06	4.55e-05
ENSG00000130066	SAT1	4.7233	4.77704	4.68725	5.10209	5.19889	5.23696	5.13091	5.1949	5.25567	0.458219	5.05048	22.2072	2.45e-06	4.64e-05
ENSG00000122068	FYTTD1	4.86719	4.93955	4.87087	5.23139	5.42861	5.36549	5.77349	5.55865	5.6181	0.614235	5.32962	22.1838	2.48e-06	4.69e-05
ENSG00000164970	FAM219A	3.58709	3.45575	3.7169	4.63458	4.73927	4.54005	4.16742	4.16549	4.07341	0.822277	4.18548	22.171	2.49e-06	4.71e-05
ENSG00000113812	ACTR8	4.31417	4.39093	4.35808	4.83503	4.74698	4.72703	4.99856	4.96624	4.9975	0.528726	4.72744	22.1624	2.51e-06	4.73e-05
ENSG00000167258	CDK12	7.1892	7.19326	7.26404	7.57906	7.57812	7.58502	7.77639	7.72772	7.80145	0.461976	7.53967	22.1235	2.56e-06	4.81e-05
ENSG00000103671	TRIP4	3.95291	3.86214	3.79256	4.38318	4.33232	4.30525	4.77789	4.67575	4.61637	0.657183	4.33926	22.0734	2.62e-06	4.92e-05
ENSG00000188859	FAM78B	-2.95634	-1.63324	-3.56511	0.329327	-0.325071	-0.1435	-1.41162	-0.352034	-0.241151	2.48176	-0.700696	22.0638	2.64e-06	4.94e-05
ENSG00000124383	MPHOSPH10	4.46144	4.36589	4.44306	4.90169	5.04296	4.80306	4.95062	4.81334	4.99409	0.496872	4.77303	22.0361	2.68e-06	5.01e-05
ENSG00000177855	CACYBPP2	5.2186	5.12923	5.26702	5.58261	5.66851	5.57129	5.85387	5.86735	5.82035	0.526979	5.57752	22.0079	2.72e-06	5.07e-05
ENSG00000227674	LINC00355	-4.58787	-3.2969	-3.56511	-2.21671	-1.80092	-1.85127	-1.25953	-0.765516	-1.5426	3.07111	-1.92742	21.9863	2.75e-06	5.12e-05
ENSG00000167034	NKX3-1	-4.58787	-4.58787	-4.58787	-2.35219	-3.01875	-2.83924	-2.77543	-1.75931	-2.81458	5.70703	-2.92828	21.9621	2.78e-06	5.18e-05
ENSG00000085433	WDR47	3.43535	3.39654	3.46556	3.85454	3.88621	3.91066	4.07566	4.15129	4.01179	0.554547	3.82385	21.9345	2.82e-06	5.25e-05
ENSG00000137500	CCDC90B	4.02814	4.08309	3.93494	4.42393	4.56076	4.44443	4.84865	4.80631	4.86063	0.653427	4.48268	21.9039	2.87e-06	5.33e-05
ENSG00000198791	CNOT7	6.854	6.80726	6.76107	7.17697	7.17865	7.15997	7.29883	7.28157	7.30628	0.427196	7.10624	21.8943	2.88e-06	5.35e-05
ENSG00000155980	KIF5A	-3.5528	-4.58787	-4.58787	-2.21671	-2.60571	-2.33187	-1.99697	-2.33809	-2.37764	3.30143	-2.69296	21.871	2.92e-06	5.4e-05
ENSG00000174358	SLC6A19	-4.58787	-3.61362	-4.58787	-2.35219	-1.43911	-2.07165	-1.99697	-1.34737	-2.81458	3.77789	-2.33723	21.8721	2.91e-06	5.4e-05
ENSG00000173391	OLR1	4.79307	4.89064	4.76216	5.209	5.31165	5.30445	5.69537	5.66128	5.75804	0.690597	5.31088	21.8625	2.93e-06	5.42e-05
ENSG00000109917	ZPR1	6.06869	5.95964	5.90539	7.01261	7.09717	7.08498	6.47385	6.48001	6.50419	0.825595	6.5784	21.8442	2.96e-06	5.46e-05
ENSG00000184992	BRI3BP	6.4814	6.42459	6.49826	6.79513	6.86277	6.85869	6.94109	6.93288	6.9537	0.423507	6.764	21.8253	2.99e-06	5.51e-05
ENSG00000107937	GTPBP4	7.34386	7.33136	7.302	7.68059	7.70317	7.70347	7.96783	7.96838	7.98415	0.515501	7.68905	21.7833	3.05e-06	5.63e-05
ENSG00000185090	MANEAL	4.25441	4.21514	4.34291	5.01529	4.84776	4.93852	4.65046	4.80127	4.67007	0.556301	4.66451	21.7811	3.06e-06	5.63e-05
ENSG00000114646	CSPG5	2.30101	2.07491	2.38768	2.84326	2.97338	3.05074	2.79425	2.77311	2.95131	0.645675	2.71749	21.7723	3.07e-06	5.65e-05
ENSG00000149100	EIF3M	6.9259	6.85553	6.94914	7.29946	7.35715	7.26975	7.6787	7.62459	7.64952	0.579633	7.32168	21.7738	3.07e-06	5.65e-05
ENSG00000134470	IL15RA	0.311944	0.0346602	0.741567	1.32759	1.03263	1.22548	1.47442	1.53208	1.52728	0.99444	1.10601	21.7534	3.1e-06	5.7e-05
ENSG00000135457	TFCP2	5.96419	6.12091	6.03801	6.46278	6.43781	6.43026	6.51859	6.44778	6.49617	0.423535	6.3381	21.7546	3.1e-06	5.7e-05
ENSG00000065135	GNAI3	6.16263	6.22128	6.09435	6.53596	6.53996	6.68379	6.97168	6.9512	6.99296	0.632651	6.61115	21.7393	3.12e-06	5.73e-05
ENSG00000079308	TNS1	6.00984	5.94657	5.99109	6.41663	6.44461	6.44301	6.35809	6.35448	6.36679	0.415361	6.27228	21.6841	3.21e-06	5.89e-05
ENSG00000165629	ATP5F1C	6.2392	6.16915	6.20211	6.59931	6.61652	6.59136	6.67309	6.58819	6.59778	0.407789	6.48786	21.6499	3.27e-06	5.99e-05
ENSG00000122591	HYCC1	4.07371	3.96763	4.03839	4.48111	4.56576	4.48673	4.60411	4.38493	4.5895	0.494231	4.37411	21.6217	3.32e-06	6.07e-05
ENSG00000080854	IGSF9B	1.94009	2.03311	2.1916	2.80396	2.50741	2.72206	2.89899	2.64387	2.70659	0.665279	2.53083	21.6151	3.33e-06	6.08e-05
ENSG00000163378	EOGT	2.59468	2.82807	2.7144	3.50355	3.34839	3.62642	3.1127	3.40917	3.27356	0.676195	3.19751	21.6135	3.33e-06	6.08e-05
ENSG00000067955	CBFB	4.92842	4.97494	4.85919	5.34457	5.29671	5.57129	5.39652	5.34243	5.48838	0.488492	5.26469	21.6087	3.34e-06	6.09e-05
ENSG00000117016	RIMS3	1.58897	1.64624	1.33919	2.02566	2.24025	2.23081	2.26468	2.16767	2.2983	0.68162	2.01477	21.5751	3.4e-06	6.19e-05
ENSG00000138134	STAMBPL1	4.16601	4.03272	4.0365	4.44835	4.60265	4.50929	4.80402	4.75925	4.86063	0.593082	4.50017	21.5476	3.45e-06	6.28e-05
ENSG00000128654	MTX2	4.74576	4.78545	4.79263	5.33565	5.39113	5.33914	5.17162	5.16067	5.15645	0.488487	5.11756	21.5356	3.47e-06	6.31e-05
ENSG00000124228	DDX27	6.38264	6.22283	6.25899	6.83686	6.78625	6.78741	6.69392	6.66403	6.64384	0.447727	6.60291	21.5084	3.52e-06	6.4e-05
ENSG00000173852	DPY19L1	4.7908	4.69452	4.64829	5.18319	5.11284	5.27476	5.67663	5.69375	5.67883	0.746491	5.24963	21.4906	3.56e-06	6.45e-05
ENSG00000123091	RNF11	5.05688	4.88966	4.82028	5.31273	5.27096	5.58019	5.54142	5.6685	5.59202	0.576653	5.33408	21.4759	3.58e-06	6.5e-05
ENSG00000136425	CIB2	-0.274208	-0.828709	-1.08731	0.860479	0.848273	-0.0822535	0.973686	0.493886	0.632264	1.40889	0.333959	21.4217	3.69e-06	6.68e-05
ENSG00000162772	ATF3	5.25696	5.1756	5.19703	6.28511	6.35625	6.25854	5.77899	5.66073	5.7048	0.82811	5.81093	21.3912	3.74e-06	6.76e-05
ENSG00000180801	ARSJ	2.55774	2.71363	2.46819	2.99752	3.28624	3.1077	3.18077	3.31325	3.26604	0.614701	3.01929	21.3926	3.74e-06	6.76e-05
ENSG00000118096	IFT46	2.18122	2.02602	2.27069	2.79196	2.66457	2.71345	3.21038	3.11295	3.14825	0.799218	2.73709	21.3852	3.76e-06	6.78e-05
ENSG00000118508	RAB32	4.97719	4.96014	5.00318	5.7172	5.64806	5.56412	5.44715	5.34659	5.35561	0.540597	5.36167	21.3814	3.76e-06	6.78e-05
ENSG00000136938	ANP32B	7.97277	8.00391	7.9789	8.44617	8.39138	8.32554	8.36652	8.41735	8.33311	0.395473	8.26052	21.3248	3.88e-06	6.97e-05
ENSG00000114744	COMMD2	5.18439	5.21119	5.20628	5.60907	5.58921	5.63764	5.70001	5.60395	5.60027	0.423567	5.49613	21.3194	3.89e-06	6.99e-05
ENSG00000144583	MARCHF4	-4.58787	-4.58787	-4.58787	-2.35219	-1.15009	-0.806913	-3.26167	-1.85796	-3.44437	6.55286	-2.27497	21.3179	3.89e-06	6.99e-05
ENSG00000132313	MRPL35	5.32528	5.2761	5.36265	5.73612	5.70742	5.66078	5.87765	5.91388	5.84137	0.471113	5.65201	21.2823	3.96e-06	7.12e-05
ENSG00000108651	UTP6	5.68656	5.62641	5.65387	6.01609	6.09308	5.98123	6.22095	6.2185	6.25962	0.479897	5.99263	21.2721	3.98e-06	7.14e-05
ENSG00000145907	G3BP1	7.65899	7.64543	7.58867	7.97239	8.01845	8.06618	8.38034	8.3719	8.33771	0.570402	8.03543	21.2737	3.98e-06	7.14e-05
ENSG00000153815	CMIP	5.58466	5.55435	5.53475	6.0446	5.94434	5.86942	6.02565	6.02705	6.0308	0.433866	5.8611	21.2701	3.99e-06	7.15e-05
ENSG00000211460	TSN	6.95054	6.92003	6.90721	7.2675	7.27152	7.30044	7.47893	7.44728	7.40973	0.439161	7.23307	21.2551	4.02e-06	7.18e-05
ENSG00000211456	SACM1L	4.46144	4.32027	4.45722	4.87444	4.77527	4.85683	5.09696	5.16695	5.12041	0.575966	4.8221	21.2509	4.03e-06	7.19e-05
ENSG00000099341	PSMD8	7.41473	7.41715	7.4256	8.21162	8.19354	8.21408	7.79795	7.81985	7.83297	0.605811	7.84978	21.2418	4.05e-06	7.22e-05
ENSG00000126216	TUBGCP3	5.38524	5.45363	5.4431	5.9848	5.94912	5.84598	5.7768	5.84695	5.82355	0.445807	5.73933	21.1984	4.14e-06	7.36e-05
ENSG00000138050	THUMPD2	2.58946	2.5454	2.80576	3.22877	3.49167	3.44328	3.26471	3.27594	3.05095	0.652985	3.11491	21.1992	4.14e-06	7.36e-05
ENSG00000116922	AIRIM	5.61515	5.59442	5.62969	6.0935	6.12809	6.09788	6.05406	5.93152	5.98286	0.43688	5.91832	21.1956	4.15e-06	7.37e-05
ENSG00000298835	ENSG00000298835	-1.52705	-0.549267	-1.22522	0.284349	0.578778	-0.112552	1.46354	1.53208	1.73767	2.20098	0.636504	21.1808	4.18e-06	7.42e-05
ENSG00000106443	PHF14	4.22274	4.20577	4.25324	4.60517	4.63626	4.72596	4.98529	4.92881	5.04331	0.604205	4.65627	21.1315	4.29e-06	7.6e-05
ENSG00000245552	LNCRNA-IUR	-1.0653	-0.682233	-0.222992	0.165358	0.389046	0.688865	0.396303	0.493886	0.584689	1.12341	0.183924	21.133	4.28e-06	7.6e-05
ENSG00000168038	ULK4	2.80294	2.83213	2.88331	3.45364	3.33384	3.3547	3.65763	3.30187	3.41288	0.586622	3.25436	21.0841	4.4e-06	7.78e-05
ENSG00000086589	RBM22	6.56288	6.54196	6.60099	7.10644	7.14361	7.06946	6.9379	6.92594	6.91004	0.450061	6.88372	21.0199	4.55e-06	8.01e-05
ENSG00000158234	FAIM	3.84973	4.00235	3.7655	4.37918	4.42314	4.37105	4.97191	4.93619	4.88784	0.812345	4.46362	21.021	4.54e-06	8.01e-05
ENSG00000197467	COL13A1	-4.58787	-3.61362	-3.56511	-1.97881	-2.02274	-2.33187	-0.411221	-0.316524	-0.241151	3.96021	-1.46462	21.0117	4.56e-06	8.04e-05
ENSG00000131732	ZCCHC9	3.69552	3.76546	3.67874	4.07854	4.18601	4.16389	4.39365	4.31872	4.41687	0.551797	4.1034	20.9666	4.67e-06	8.21e-05
ENSG00000138231	DBR1	5.11978	4.9129	4.86025	5.32943	5.43135	5.44565	5.67781	5.77264	5.71864	0.603964	5.39758	20.88	4.89e-06	8.57e-05
ENSG00000086200	IPO11	4.00872	3.96021	3.95703	4.33437	4.49031	4.51302	4.92604	4.92974	4.82141	0.713373	4.48691	20.8652	4.93e-06	8.64e-05
ENSG00000035499	DEPDC1B	3.42367	3.55756	3.43441	3.93495	3.87016	4.1416	4.00607	3.96725	4.02967	0.522012	3.84052	20.8531	4.96e-06	8.68e-05
ENSG00000136026	CKAP4	8.4067	8.41604	8.45792	8.76095	8.84734	8.75852	8.86736	8.86832	8.80757	0.392057	8.69986	20.8489	4.97e-06	8.7e-05
ENSG00000112294	ALDH5A1	3.70762	3.7612	3.82786	4.16482	4.18601	4.21206	4.45541	4.41825	4.44379	0.553342	4.15708	20.8242	5.03e-06	8.8e-05
ENSG00000161813	LARP4	6.16351	6.05455	6.0752	6.41174	6.49748	6.52649	6.79646	6.74504	6.69515	0.520582	6.46539	20.8025	5.09e-06	8.88e-05
ENSG00000139496	NUP58	5.38825	5.41278	5.49206	5.85239	5.8971	5.88436	6.34998	6.36853	6.39162	0.71361	5.94394	20.7869	5.13e-06	8.94e-05
ENSG00000070785	EIF2B3	5.92484	5.92339	5.91157	6.30987	6.31386	6.35303	6.30799	6.31187	6.29977	0.396469	6.19581	20.7689	5.18e-06	9.01e-05
ENSG00000145354	CISD2	1.70935	1.40536	1.64652	2.11828	2.2214	2.16918	2.27717	2.31645	2.39801	0.667	2.06405	20.7681	5.18e-06	9.01e-05
ENSG00000184588	PDE4B	4.98715	4.96756	4.90845	5.44186	5.44496	5.4573	6.09299	6.02446	5.98401	0.81673	5.54643	20.7549	5.22e-06	9.07e-05
ENSG00000136875	PRPF4	7.45834	7.39806	7.46817	7.87004	7.86251	7.83419	7.85218	7.78707	7.78296	0.390172	7.71324	20.712	5.34e-06	9.26e-05
ENSG00000029993	HMGB3	6.63242	6.66053	6.71938	7.04415	7.04808	7.0284	7.09917	7.06117	7.1238	0.396684	6.94736	20.6981	5.38e-06	9.32e-05
ENSG00000124207	CSE1L	7.34715	7.39015	7.38859	7.71569	7.75489	7.73944	8.05236	8.03089	7.99756	0.513847	7.73742	20.6947	5.39e-06	9.33e-05
ENSG00000119446	RBM18	3.9751	3.99511	4.13139	4.42134	4.50338	4.44313	4.54723	4.62415	4.634	0.496291	4.38404	20.6826	5.42e-06	9.38e-05
ENSG00000133313	CNDP2	6.84225	6.80183	6.83721	7.385	7.38971	7.4064	7.14929	7.17353	7.20839	0.462561	7.1513	20.6621	5.48e-06	9.46e-05
ENSG00000154240	CEP112	-2.07149	-1.82494	-1.74171	-0.782115	-0.522829	0.139632	0.173873	0.590579	-0.749845	1.93884	-0.474046	20.665	5.47e-06	9.46e-05
ENSG00000111906	HDDC2	5.11616	5.26033	5.25896	5.70445	5.68064	5.66859	5.64143	5.57529	5.60772	0.434008	5.51649	20.6597	5.49e-06	9.47e-05
ENSG00000162664	ZNF326	5.0049	5.06931	5.0214	5.42059	5.3656	5.4961	5.75296	5.58588	5.65023	0.519498	5.39812	20.6572	5.49e-06	9.48e-05
ENSG00000101182	PSMA7	7.97127	7.96229	7.90851	8.74151	8.65713	8.74465	8.31586	8.33321	8.36195	0.590891	8.36704	20.6514	5.51e-06	9.49e-05
ENSG00000108064	TFAM	5.54813	5.47004	5.47824	5.82271	5.83798	5.96863	6.0486	6.06919	6.01406	0.46449	5.82464	20.6429	5.53e-06	9.52e-05
ENSG00000113648	MACROH2A1	7.32964	7.30489	7.32012	7.81415	7.75899	7.73983	7.6651	7.65649	7.67849	0.401845	7.5981	20.6118	5.62e-06	9.67e-05
ENSG00000148842	CNNM2	5.37693	5.45429	5.43239	5.84805	5.81563	5.7712	6.17037	6.11786	6.13201	0.564061	5.82075	20.5654	5.76e-06	9.89e-05
ENSG00000262919	CCNQ	5.21944	5.22518	5.13497	6.43089	6.37415	6.41408	5.67545	5.71267	5.77867	0.911917	5.86024	20.5572	5.79e-06	9.93e-05
ENSG00000116095	PLEKHA3	2.89889	3.27327	3.07179	3.59847	3.52793	3.65143	3.94279	3.8014	3.84008	0.646066	3.54958	20.5276	5.88e-06	0.000100712
ENSG00000176490	DIRAS1	4.53387	4.53018	4.58264	4.9875	5.02676	4.99023	5.04951	4.93251	4.92413	0.437517	4.85447	20.5268	5.88e-06	0.000100712
ENSG00000101096	NFATC2	-2.53559	-4.58787	-2.97263	-0.602423	0.674313	-0.496109	-1.25953	-1.02731	-1.3454	3.1889	-0.952678	20.478	6.03e-06	0.000103175
ENSG00000071205	ARHGAP10	4.27244	4.28805	4.16456	4.72151	4.70575	4.69131	4.73212	4.5883	4.77049	0.460373	4.56499	20.4703	6.06e-06	0.000103529
ENSG00000145819	ARHGAP26	3.78042	3.87994	3.8059	4.28385	4.30123	4.20593	4.63112	4.57181	4.69128	0.63789	4.27687	20.4399	6.15e-06	0.00010505
ENSG00000100142	POLR2F	6.16833	6.12962	6.11638	6.82562	6.80352	6.92429	6.47011	6.53177	6.56712	0.559252	6.53386	20.3884	6.32e-06	0.000107842
ENSG00000139131	YARS2	5.66625	5.64445	5.68067	6.23945	6.23576	6.12085	5.9891	6.02791	6.07666	0.45468	5.98205	20.3469	6.46e-06	0.000109994
ENSG00000154118	JPH3	0.608779	0.384156	0.313752	1.28256	1.07526	1.50034	1.90299	2.05695	1.38177	1.15834	1.28807	20.3229	6.54e-06	0.000111312
ENSG00000074696	HACD3	7.01571	7.04493	6.99499	7.40844	7.45926	7.43221	7.93174	7.90269	7.85961	0.665945	7.49478	20.3078	6.59e-06	0.000111895
ENSG00000138622	HCN4	-3.5528	-3.61362	-3.56511	-2.09286	-2.60571	-1.2036	-1.12197	-0.864608	-1.17193	2.93023	-1.82764	20.3066	6.6e-06	0.000111895
ENSG00000152952	PLOD2	3.65862	3.58675	3.72629	4.06031	4.25098	3.99655	4.34107	4.32857	4.28727	0.559708	4.05347	20.3055	6.6e-06	0.000111895
ENSG00000164951	PDP1	3.22258	3.19328	3.40549	3.80763	3.59295	3.87636	3.92702	3.88385	3.91413	0.562921	3.67403	20.3091	6.59e-06	0.000111895
ENSG00000174574	AKIRIN1	6.98001	6.96959	7.01499	7.33056	7.40441	7.34467	7.41077	7.37327	7.36994	0.384334	7.2555	20.3079	6.59e-06	0.000111895
ENSG00000070061	ELP1	6.59579	6.5739	6.53143	6.94964	6.92892	6.94627	7.27606	7.28066	7.29455	0.555636	6.96028	20.3015	6.61e-06	0.000112059
ENSG00000187522	HSPA14	3.00854	3.25217	3.13657	3.80564	3.90603	3.91066	3.49068	3.70102	3.63933	0.616378	3.57319	20.2745	6.71e-06	0.000113433
ENSG00000152332	UHMK1	6.32296	6.33029	6.27106	6.67313	6.66675	6.84988	7.14844	7.16098	7.21402	0.6623	6.7816	20.2341	6.85e-06	0.000115631
ENSG00000100522	GNPNAT1	5.53529	5.57998	5.62343	5.93201	5.96054	6.00921	6.34998	6.29869	6.26529	0.566402	5.98094	20.1938	7e-06	0.00011772
ENSG00000158109	TPRG1L	5.9066	5.83492	5.8945	6.28083	6.3777	6.3377	6.24659	6.23766	6.25155	0.410937	6.16531	20.1678	7.09e-06	0.000119257
ENSG00000185753	CXorf38	4.81448	4.92724	4.86875	5.33012	5.29821	5.25265	5.37053	5.25072	5.28573	0.428076	5.16967	20.1554	7.14e-06	0.000119953
ENSG00000141030	COPS3	6.58108	6.60663	6.61337	6.94828	7.01584	7.00257	7.00021	6.95234	6.98897	0.384615	6.86779	20.1238	7.26e-06	0.000121799
ENSG00000057608	GDI2	8.39487	8.38859	8.37421	8.72806	8.79071	8.74055	9.13832	9.09456	9.07904	0.553528	8.77741	20.0245	7.65e-06	0.00012788
ENSG00000071994	PDCD2	6.60939	6.60455	6.58141	7.12011	7.10426	7.02449	6.97791	6.93955	6.92235	0.418516	6.8904	20.0107	7.7e-06	0.000128728
ENSG00000162377	COA7	6.42318	6.41377	6.38284	6.79238	6.75872	6.70729	6.89321	6.91432	6.91996	0.426699	6.70463	19.987	7.8e-06	0.00013025
ENSG00000293278	ENSG00000293278	-2.95634	-4.58787	-4.58787	-2.09286	-1.80092	-2.1959	-1.58164	-2.20227	-2.04273	2.8119	-2.36579	19.9755	7.84e-06	0.000130952
ENSG00000075785	RAB7A	8.1282	8.18373	8.18925	8.71415	8.75639	8.64722	8.48155	8.53675	8.50778	0.44388	8.47782	19.9689	7.87e-06	0.000131325
ENSG00000112139	MDGA1	-0.823344	-2.30737	-2.22969	0.351301	-0.151181	-0.665444	0.942656	1.0236	1.00182	2.30873	0.107614	19.9664	7.88e-06	0.000131414
ENSG00000163875	MEAF6	5.77427	5.77752	5.76504	6.18696	6.18921	6.27142	6.12531	6.13399	6.15204	0.405339	6.05455	19.9581	7.92e-06	0.000131817
ENSG00000187753	C9orf153	-2.36376	-2.30737	-2.55386	-0.137126	0.0616625	-0.274392	-1.12197	-1.49834	-0.812163	2.12849	-0.919053	19.9591	7.91e-06	0.000131817
ENSG00000196591	HDAC2	6.20462	6.25576	6.19579	6.53025	6.62999	6.62962	6.97791	6.92247	6.91094	0.558533	6.61411	19.9163	8.09e-06	0.000134564
ENSG00000119185	ITGB1BP1	6.09426	6.1395	6.12705	6.51421	6.5679	6.44432	6.50737	6.58496	6.49376	0.399318	6.39836	19.8847	8.23e-06	0.000136545
ENSG00000138463	SLC49A4	4.22611	4.35886	4.37459	4.82721	4.89711	4.93482	4.69303	4.70521	4.75982	0.485256	4.66176	19.8466	8.39e-06	0.000139036
ENSG00000267506	ENSG00000267506	-2.21024	-3.61362	-2.97263	-0.645292	-1.28738	-1.49139	0.251889	0.78292	1.0725	3.33292	-0.417689	19.8276	8.47e-06	0.000140155
ENSG00000130147	SH3BP4	5.92017	5.89644	5.79601	6.42378	6.34722	6.3176	6.24738	6.24325	6.21443	0.429254	6.17151	19.8065	8.57e-06	0.000141556
ENSG00000185344	ATP6V0A2	5.06536	4.93009	4.94809	5.41408	5.35122	5.44045	5.41995	5.35074	5.48028	0.428173	5.28118	19.7812	8.68e-06	0.000143241
ENSG00000250444	CCT5P1	0.971779	0.531555	0.9799	1.6087	1.51792	1.3966	1.75901	1.78186	1.91163	0.844485	1.44377	19.7494	8.83e-06	0.000145556
ENSG00000132964	CDK8	3.10314	3.2552	3.35194	3.57998	3.78925	3.80115	4.07744	3.85105	4.00277	0.619915	3.68053	19.7357	8.89e-06	0.000146417
ENSG00000110066	KMT5B	3.32663	3.32038	3.40549	3.73008	3.78497	3.81329	4.01542	4.03755	3.93799	0.541436	3.73272	19.711	9.01e-06	0.000148047
ENSG00000170248	PDCD6IP	6.83483	6.9587	6.89997	7.23204	7.36665	7.28817	7.72986	7.72904	7.68538	0.622266	7.34173	19.685	9.13e-06	0.000149984
ENSG00000134308	YWHAQ	8.58356	8.58039	8.5596	8.90277	8.86473	8.95694	9.1035	9.14727	9.11507	0.444759	8.88572	19.6837	9.14e-06	0.000149996
ENSG00000033170	FUT8	3.01634	3.15806	2.98845	3.42024	3.67377	3.59395	4.12314	3.88194	3.97767	0.743663	3.59015	19.6689	9.21e-06	0.000150974
ENSG00000135070	ISCA1	5.64628	5.59861	5.57036	5.90626	5.96338	6.06864	6.2553	6.29546	6.17481	0.512643	5.96635	19.6513	9.29e-06	0.000152178
ENSG00000303195	ENSG00000303195	-4.58787	-4.58787	-4.58787	-2.35219	-3.59974	-2.33187	-2.26024	-3.06278	-2.81458	5.52033	-3.05915	19.6417	9.34e-06	0.000152848
ENSG00000132912	DCTN4	6.19349	6.22089	6.22008	6.56063	6.56697	6.55899	6.83789	6.84863	6.83641	0.496876	6.56092	19.6372	9.36e-06	0.000153116
ENSG00000138829	FBN2	-1.72091	-0.935334	-2.22969	0.214138	-0.0257415	-0.1435	0.62851	-0.425789	-0.329542	1.66951	-0.321247	19.6283	9.41e-06	0.000153735
ENSG00000170027	YWHAG	9.36865	9.36684	9.356	9.67507	9.66653	9.72517	9.87544	9.84936	9.86945	0.415816	9.6539	19.5967	9.56e-06	0.000155917
ENSG00000104388	RAB2A	6.05881	6.02819	5.98182	6.33559	6.34831	6.4592	6.58069	6.66319	6.58763	0.477957	6.35869	19.56	9.75e-06	0.000158643
ENSG00000100591	AHSA1	7.89822	7.85315	7.83315	8.52048	8.52088	8.51202	8.21112	8.18904	8.23046	0.510576	8.22131	19.5382	9.86e-06	0.00016027
ENSG00000138442	WDR12	5.78915	5.81501	5.84421	6.16037	6.15856	6.18687	6.45611	6.3617	6.37074	0.471085	6.14665	19.5341	9.88e-06	0.000160512
ENSG00000151025	GPR158	0.90612	0.406158	0.410066	1.47498	1.45474	1.21332	2.16065	2.21697	1.94968	1.22298	1.49286	19.5023	1e-05	0.000162912
ENSG00000297506	ENSG00000297506	-3.97944	-4.58787	-4.58787	-2.35219	-3.01875	-2.33187	-2.77543	-2.65541	-2.37764	3.75434	-2.95129	19.4635	1.03e-05	0.000165847
ENSG00000144357	UBR3	3.87783	4.06765	4.13315	4.45471	4.49163	4.47404	4.62625	4.64118	4.45375	0.496553	4.37885	19.4502	1.03e-05	0.000166899
ENSG00000162302	RPS6KA4	6.49123	6.44897	6.46221	7.58892	7.47095	7.48628	6.89574	6.94504	6.92981	0.782998	7.03344	19.4414	1.04e-05	0.000167364
ENSG00000176170	SPHK1	6.56787	6.58358	6.52438	7.35727	7.29086	7.35353	6.8583	6.97267	6.99893	0.593951	6.98046	19.4424	1.04e-05	0.000167364
ENSG00000163938	GNL3	6.25865	6.23709	6.19917	6.6783	6.77444	6.6599	6.63902	6.54721	6.57285	0.415603	6.5216	19.4207	1.05e-05	0.000168987
ENSG00000116161	CACYBP	7.00325	7.02017	6.98574	7.3366	7.37521	7.35318	7.65002	7.67756	7.69135	0.51975	7.36947	19.414	1.05e-05	0.000169472
ENSG00000186432	KPNA4	5.84934	5.90902	5.84852	6.19077	6.32421	6.26959	6.62931	6.71049	6.65036	0.60803	6.30142	19.4037	1.06e-05	0.000170284
ENSG00000005436	GCFC2	2.37568	2.50009	2.35175	3.04211	2.99944	3.19069	2.87864	2.81373	3.10675	0.602908	2.83718	19.3754	1.07e-05	0.000172516
ENSG00000176731	RBIS	3.05472	3.15806	3.14359	3.74676	3.88021	3.77242	3.51198	3.53113	3.62764	0.56721	3.51985	19.3761	1.07e-05	0.000172516
ENSG00000255774	LINC02747	-4.58787	-4.58787	-4.58787	-3.64117	-2.28498	-2.482	-2.99816	-2.65541	-1.7711	5.6734	-2.97309	19.3678	1.08e-05	0.000173094
ENSG00000172339	ALG14	1.19439	1.23143	1.19794	2.16245	1.90426	2.1309	1.71378	1.81425	1.82215	0.737663	1.73189	19.3449	1.09e-05	0.00017476
ENSG00000117862	TXNDC12	2.65589	2.55035	2.51225	3.28693	3.1265	3.28086	2.99286	3.24061	2.98376	0.588099	2.98868	19.3368	1.1e-05	0.000175294
ENSG00000003056	M6PR	7.40864	7.42593	7.42073	7.91523	7.89882	7.90171	7.75212	7.73302	7.75116	0.409248	7.70367	19.3329	1.1e-05	0.000175547
ENSG00000102024	PLS3	7.1701	7.13187	7.16788	7.5504	7.60429	7.60537	8.14717	8.16107	8.10961	0.732866	7.68397	19.3099	1.11e-05	0.000177559
ENSG00000106609	TMEM248	4.94996	5.01038	4.96998	5.56097	5.55197	5.49798	5.34108	5.41024	5.27547	0.467321	5.30427	19.2793	1.13e-05	0.000180218
ENSG00000164151	ICE1	6.85644	6.84802	6.88513	7.18502	7.28804	7.15282	7.36176	7.32209	7.29408	0.405991	7.14615	19.256	1.14e-05	0.000182204
ENSG00000080822	CLDND1	3.19191	3.3855	3.3849	3.75914	3.71929	3.83131	3.86838	3.86464	3.98456	0.517425	3.68768	19.2513	1.15e-05	0.00018255
ENSG00000075975	MKRN2	4.44274	4.39918	4.27099	4.8015	4.86609	4.8935	4.80833	4.73195	4.80073	0.445882	4.68431	19.235	1.16e-05	0.000184002
ENSG00000015475	BID	5.18785	5.21587	5.20545	6.19761	6.07087	6.09871	5.58163	5.70081	5.60549	0.695498	5.7014	19.2198	1.16e-05	0.000185138
ENSG00000153975	ZUP1	2.30738	2.60844	2.61687	2.99404	2.98833	3.20611	3.07026	3.23464	3.12765	0.591398	2.93602	19.2164	1.17e-05	0.000185359
ENSG00000260037	ENSG00000260037	-4.58787	-3.61362	-2.97263	-1.68247	-2.02274	-1.66014	-1.58164	-2.33809	-1.17193	2.57645	-2.11129	19.1883	1.18e-05	0.000187853
ENSG00000119953	SMNDC1	5.53393	5.5055	5.4431	5.8495	5.759	6.01403	6.00327	6.01534	6.01798	0.452259	5.81116	19.147	1.21e-05	0.0001913
ENSG00000213856	VDAC1P2	4.54874	4.59387	4.57617	4.98047	4.93619	4.99734	5.03579	4.96443	5.00768	0.414727	4.86202	19.1473	1.21e-05	0.0001913
ENSG00000124193	SRSF6	2.43508	2.3662	2.22508	3.35377	3.21495	3.32675	2.96611	2.71852	2.90363	0.759956	2.88967	19.1325	1.22e-05	0.000192531
ENSG00000291106	SNHG33	-2.53559	-2.81744	-2.22969	-0.881116	-1.36125	-1.27035	-0.223546	-1.14695	-0.524441	1.92199	-1.22288	19.1287	1.22e-05	0.000192799
ENSG00000061676	NCKAP1	5.829	5.75734	5.79322	6.10324	6.1323	6.21497	6.46637	6.41878	6.38816	0.501087	6.14589	19.1204	1.23e-05	0.000193407
ENSG00000123562	MORF4L2	8.92624	8.93665	8.90845	9.2218	9.27604	9.25215	9.34392	9.37542	9.33639	0.378175	9.18661	19.1084	1.24e-05	0.000194397
ENSG00000111670	GNPTAB	5.05309	5.13089	5.1002	5.59187	5.61954	5.44695	6.21528	6.05019	6.03191	0.759294	5.64232	19.064	1.26e-05	0.000198263
ENSG00000306286	ENSG00000306286	-3.5528	-3.61362	-3.56511	-1.97881	-2.14791	-1.66014	-1.49412	-2.33809	-1.25606	2.49721	-2.16986	19.0495	1.27e-05	0.000199538
ENSG00000085719	CPNE3	4.56744	4.61881	4.56706	5.03918	5.24708	4.98755	5.78775	5.79107	5.71588	0.885231	5.22968	19.0393	1.28e-05	0.000200488
ENSG00000082898	XPO1	6.06494	6.11383	6.06738	6.38902	6.40859	6.52802	6.78557	6.71854	6.67506	0.510038	6.44132	19.0249	1.29e-05	0.000201892
ENSG00000166562	SEC11C	4.49532	4.50746	4.48513	5.24172	5.17786	5.11151	4.83709	4.87799	4.91935	0.541078	4.87762	19.0236	1.29e-05	0.000201905
ENSG00000106344	RBM28	6.00298	5.88229	5.95263	6.30742	6.36487	6.26407	6.46569	6.34862	6.3847	0.410678	6.23298	19.018	1.29e-05	0.000202381
ENSG00000138792	ENPEP	-3.5528	-4.58787	-4.58787	-2.35219	-1.90757	-2.07165	-1.25953	-3.06278	-1.3454	3.78694	-2.34366	19.0122	1.3e-05	0.000202751
ENSG00000072110	ACTN1	8.21019	8.21201	8.21511	8.93928	8.91418	8.89642	8.53144	8.56974	8.59103	0.538893	8.59301	18.9641	1.33e-05	0.000207319
ENSG00000081051	AFP	-4.58787	-4.58787	-4.58787	-3.07442	-2.02274	-2.64959	-3.58431	-2.07815	-2.81458	5.5982	-3.00512	18.9618	1.33e-05	0.000207446
ENSG00000153885	KCTD15	6.18009	6.19268	6.10653	6.73894	6.60202	6.66633	6.48601	6.52597	6.50818	0.430839	6.46111	18.9368	1.35e-05	0.000210061
ENSG00000137074	APTX	6.41324	6.34211	6.41257	6.88072	6.87514	6.82537	6.80888	6.67675	6.72185	0.41065	6.67584	18.9038	1.37e-05	0.00021322
ENSG00000163682	RPL9	5.8737	5.84854	5.89606	6.69343	6.62043	6.69859	6.22095	6.27815	6.26765	0.606011	6.30348	18.8896	1.39e-05	0.000214565
ENSG00000168724	DNAJC21	5.63745	5.5055	5.59873	5.90904	5.99194	5.93662	6.28343	6.24659	6.21687	0.524337	5.95118	18.8899	1.38e-05	0.000214565
ENSG00000155959	VBP1	4.71494	4.63404	4.56575	5.05767	5.07307	5.14311	5.08102	5.00271	5.02561	0.42575	4.93636	18.8843	1.39e-05	0.000214906
ENSG00000131944	FAAP24	3.28203	3.05738	3.04204	3.70897	3.63155	3.57031	3.53036	3.76871	3.77269	0.537451	3.50933	18.8791	1.39e-05	0.000215374
ENSG00000143067	ZNF697	3.70279	3.65725	3.73329	4.13188	4.05191	4.15597	4.23462	4.28155	4.1387	0.471057	4.02758	18.8678	1.4e-05	0.000216268
ENSG00000287058	ENSG00000287058	1.79346	1.83649	1.81431	2.24692	2.48123	2.30146	2.63352	2.78542	2.55437	0.703019	2.31509	18.8603	1.41e-05	0.000216876
ENSG00000168310	IRF2	3.93245	3.78658	3.92275	4.31912	4.35413	4.1936	4.59915	4.53219	4.52007	0.545522	4.26677	18.8569	1.41e-05	0.000217136
ENSG00000127720	METTL25	1.30041	1.52077	1.44529	1.90457	2.09588	2.04429	2.30793	2.05017	2.42527	0.728305	1.94398	18.838	1.42e-05	0.000218908
ENSG00000114904	NEK4	3.19535	3.39379	3.18502	3.75708	3.63867	3.74522	4.00043	3.94548	4.14486	0.621822	3.70317	18.8246	1.43e-05	0.00022033
ENSG00000112379	ARFGEF3	1.63022	2.07491	1.75136	2.39708	2.46529	2.37427	2.9738	2.84543	2.78235	0.832644	2.43183	18.8231	1.43e-05	0.000220367
ENSG00000049245	VAMP3	6.37545	6.42021	6.40528	6.7691	6.74531	6.74474	7.07209	7.07126	7.11729	0.529348	6.77387	18.8193	1.44e-05	0.000220679
ENSG00000116198	CEP104	4.81	4.81762	5.00799	5.37103	5.29371	5.21654	5.28497	5.38147	5.40181	0.445343	5.19276	18.7839	1.46e-05	0.000224553
ENSG00000085760	MTIF2	4.86395	4.81864	4.8772	5.27371	5.37131	5.13265	5.71271	5.65235	5.6107	0.621468	5.29552	18.7594	1.48e-05	0.000227323
ENSG00000204147	ASAH2B	1.48037	1.58969	1.86617	2.34874	2.12999	2.2126	2.61887	2.47177	2.37022	0.719883	2.16692	18.7473	1.49e-05	0.000228646
ENSG00000096401	CDC5L	4.78282	4.65026	4.77352	5.119	5.28692	5.18497	5.80403	5.79412	5.73711	0.781586	5.30102	18.7408	1.5e-05	0.000229291
ENSG00000090889	KIF4A	6.79372	6.77566	6.73922	7.07481	7.14152	7.07724	7.28537	7.28283	7.30169	0.427609	7.06832	18.7243	1.51e-05	0.000230883
ENSG00000183783	KCTD8	-2.53559	-1.82494	-3.56511	-1.10217	-1.02474	-0.758199	0.419027	-0.503519	-0.329542	2.28333	-0.873268	18.676	1.55e-05	0.000236672
ENSG00000183726	TMEM50A	6.47469	6.48204	6.44384	6.76194	6.78918	6.87784	7.09035	7.0281	7.11205	0.483147	6.80624	18.6614	1.56e-05	0.000237937
ENSG00000158290	CUL4B	5.36934	5.41006	5.42449	5.78487	5.77202	5.74978	6.11273	6.16612	6.0847	0.554795	5.79371	18.6457	1.57e-05	0.000239492
ENSG00000185298	CCDC137	6.20505	6.16674	6.07979	6.92168	6.90966	6.91281	6.55207	6.52536	6.49134	0.581093	6.56339	18.6002	1.61e-05	0.000244858
ENSG00000137970	RPL7P9	7.69756	7.718	7.6291	8.1034	8.12787	8.08194	8.03878	8.01399	7.98959	0.378132	7.94476	18.5829	1.63e-05	0.000246665
ENSG00000110660	SLC35F2	5.89289	5.89207	5.92641	6.33076	6.36272	6.33033	6.28343	6.20329	6.25915	0.392321	6.17672	18.5808	1.63e-05	0.000246784
ENSG00000140961	OSGIN1	2.28818	2.18081	2.05676	3.61219	3.50212	3.51688	2.62865	2.97288	2.75037	1.04554	2.94765	18.5761	1.63e-05	0.000247252
ENSG00000130700	GATA5	-2.95634	-1.82494	-2.97263	-1.22686	-1.28738	-0.758199	-0.674334	-0.425789	0.0665253	2.07556	-1.05093	18.5596	1.65e-05	0.000249122
ENSG00000159713	TPPP3	-4.58787	-4.58787	-4.58787	-2.66857	-3.59974	-2.33187	-2.99816	-3.06278	-2.37764	5.35377	-3.17284	18.5088	1.69e-05	0.000255417
ENSG00000065320	NTN1	-1.13271	-1.82494	-1.46047	-0.689473	0.0331122	-0.274392	1.174	0.846958	0.722953	2.01266	0.0373329	18.5032	1.7e-05	0.000255871
ENSG00000214575	CPEB1	-4.58787	-4.58787	-4.58787	-3.64117	-3.01875	-2.83924	-2.58253	-2.65541	-2.81458	5.20297	-3.26608	18.4733	1.72e-05	0.000259331
ENSG00000185252	ZNF74	4.46144	4.42904	4.50162	5.44442	5.37345	5.44955	4.8434	4.85287	4.9975	0.721791	4.98245	18.4563	1.74e-05	0.000261499
ENSG00000142794	NBPF3	0.872136	1.14248	0.848563	1.81253	1.29559	1.82203	2.26468	1.97334	2.05817	0.951524	1.64914	18.4425	1.75e-05	0.000262947
ENSG00000101213	PTK6	2.78478	2.69141	2.79242	3.20483	3.31617	3.21834	3.22979	3.27594	3.22007	0.490711	3.09983	18.4343	1.76e-05	0.000263786
ENSG00000205423	CNEP1R1	2.18122	2.04718	2.10072	2.62612	2.71936	2.53926	2.70461	2.67066	2.63832	0.544713	2.49243	18.4185	1.77e-05	0.000265677
ENSG00000150938	CRIM1	5.43483	5.46153	5.49275	5.79442	5.84774	5.82215	6.15353	6.13359	6.18681	0.5366	5.84195	18.4137	1.78e-05	0.000266198
ENSG00000150787	PTS	4.68955	4.71889	4.70635	5.37841	5.38691	5.34612	5.18328	4.96624	5.08772	0.529297	5.07795	18.358	1.83e-05	0.000273507
ENSG00000285958	ENSG00000285958	-1.0009	-0.828709	-1.29946	-0.0772004	-0.0870985	-0.0822535	-0.188772	-0.151009	-0.00446324	0.985313	-0.34581	18.3586	1.83e-05	0.000273507
ENSG00000187815	ZFP69	-4.58787	-3.61362	-4.58787	-2.50172	-2.02274	-2.64959	-2.77543	-2.33809	-1.90053	3.25325	-2.7347	18.3299	1.86e-05	0.000277389
ENSG00000203780	FANK1	2.08807	2.09537	2.1916	3.22877	3.0819	3.29824	2.60408	2.76898	2.59095	0.838651	2.73117	18.3285	1.86e-05	0.000277427
ENSG00000233830	EIF4HP1	6.60423	6.51152	6.57233	6.96352	6.97889	6.92848	6.9176	6.89409	6.92891	0.372507	6.82178	18.3179	1.87e-05	0.000278818
ENSG00000049656	CLPTM1L	7.5976	7.57176	7.54343	8.22897	8.21505	8.13449	7.90407	7.86972	7.94053	0.485464	7.91209	18.3131	1.87e-05	0.000279173
ENSG00000150768	DLAT	6.19521	6.22283	6.14728	6.51512	6.59501	6.53659	6.61984	6.57908	6.55213	0.378101	6.45142	18.3123	1.87e-05	0.000279173
ENSG00000131668	BARX1	-0.939257	-0.389129	-1.37772	0.165358	0.781185	-0.207462	1.20048	1.38885	1.03759	1.74436	0.45389	18.2762	1.91e-05	0.000283804
ENSG00000135905	DOCK10	2.97291	3.0539	2.99622	3.39137	3.36567	3.54869	3.74115	3.70102	3.671	0.57074	3.41119	18.2671	1.92e-05	0.000284905
ENSG00000029725	RABEP1	4.83998	5.00138	5.03656	5.49588	5.53616	5.46694	5.38358	5.25146	5.37146	0.4593	5.28335	18.2657	1.92e-05	0.000284962
ENSG00000187098	MITF	4.82562	4.86605	4.68123	5.03833	5.25251	5.32296	5.58289	5.59056	5.61662	0.623383	5.23667	18.2403	1.95e-05	0.000288572
ENSG00000135372	NAT10	7.9452	7.91224	7.89804	8.58485	8.5782	8.55859	8.25688	8.25479	8.24296	0.503208	8.27272	18.2246	1.96e-05	0.000290528
ENSG00000149313	AASDHPPT	2.33259	2.16154	2.2898	2.80396	2.78932	2.73062	3.10921	2.7895	3.14415	0.644038	2.71959	18.2182	1.97e-05	0.000291345
ENSG00000119938	PPP1R3C	5.5728	5.46087	5.61461	5.92699	5.96101	5.84351	6.17955	6.2298	6.23046	0.519665	5.91698	18.21	1.98e-05	0.000292436
ENSG00000108179	PPIF	8.60918	8.60446	8.58884	9.43407	9.40118	9.41039	8.95246	8.97768	8.97181	0.607854	9.03305	18.2061	1.98e-05	0.000292863
ENSG00000158186	MRAS	5.75517	5.82065	5.80821	6.14236	6.11282	6.12613	6.26042	6.30583	6.31169	0.41749	6.08617	18.1763	2.01e-05	0.000297158
ENSG00000229932	YWHAZP3	5.0292	4.99595	5.06458	5.41799	5.37771	5.33283	5.59104	5.59115	5.60475	0.460372	5.35255	18.1752	2.01e-05	0.000297158
ENSG00000096070	BRPF3	5.78573	5.81604	5.89398	6.27185	6.30381	6.29036	6.14461	6.25621	6.14129	0.403967	6.11386	18.1718	2.02e-05	0.000297522
ENSG00000182552	RWDD4	2.88617	2.9454	2.95291	3.27835	3.44367	3.56553	3.53816	3.42236	3.37842	0.514741	3.28967	18.1634	2.03e-05	0.000298678
ENSG00000162458	FBLIM1	-2.53559	-3.03734	-1.22522	-0.480969	-0.703213	-0.711076	-0.333198	0.324286	0.290629	2.04367	-0.608763	18.1449	2.05e-05	0.000301259
ENSG00000137801	THBS1	3.31086	3.29996	3.31509	4.6546	4.61234	4.70766	3.87866	3.97623	3.71861	1.0093	4.0513	18.1293	2.06e-05	0.000303288
ENSG00000176171	BNIP3	5.10614	5.11678	5.03089	5.37439	5.5001	5.42866	5.65346	5.64786	5.62179	0.456974	5.40504	18.0974	2.1e-05	0.0003075
ENSG00000187498	COL4A1	7.47506	7.5077	7.47201	7.81514	7.82735	7.77232	7.90357	7.91337	7.93639	0.377591	7.74736	18.0925	2.1e-05	0.000308113
ENSG00000150750	POU2AF2	-4.58787	-4.58787	-4.58787	-3.07442	-1.80092	-4.58787	-0.880858	-1.21072	-0.524441	6.91023	-2.04596	18.0764	2.12e-05	0.000310552
ENSG00000105879	CBLL1	5.09237	4.85908	4.97294	5.31413	5.43885	5.37644	5.45816	5.44557	5.38455	0.426545	5.27534	18.06	2.14e-05	0.000312734
ENSG00000131876	SNRPA1	5.00784	5.04234	5.1002	5.45904	5.5092	5.54726	5.50272	5.33477	5.43488	0.416066	5.34059	18.0563	2.14e-05	0.000313022
ENSG00000145348	TBCK	2.2155	2.47948	2.45131	2.89279	2.99575	2.8375	2.92304	2.93286	3.16856	0.576754	2.79433	18.0545	2.15e-05	0.000313022
ENSG00000091527	CDV3	7.26113	7.3058	7.27228	7.57847	7.64421	7.57257	7.82519	7.81648	7.77917	0.426867	7.57795	18.0504	2.15e-05	0.000313273
ENSG00000309040	ENSG00000309040	-4.58787	-4.58787	-4.58787	-3.07442	-3.01875	-3.05764	-1.33357	-3.06278	-1.3454	6.04052	-2.72831	18.0286	2.18e-05	0.000316712
ENSG00000147604	RPL7	5.59381	5.58541	5.55661	6.05301	5.99147	6.05166	5.9151	5.93198	5.90328	0.397476	5.85519	18.0172	2.19e-05	0.000318424
ENSG00000165678	GHITM	8.35698	8.32144	8.29975	8.63309	8.6626	8.69556	8.71595	8.66698	8.71902	0.356308	8.57326	17.998	2.21e-05	0.000321274
ENSG00000007168	PAFAH1B1	7.1356	7.08085	7.14226	7.64322	7.61426	7.6197	7.4324	7.40785	7.47091	0.414941	7.40917	17.9855	2.23e-05	0.000323072
ENSG00000120334	CENPL	5.05309	4.97125	5.01471	5.33427	5.39885	5.39607	5.43256	5.45779	5.43488	0.39663	5.28924	17.9701	2.24e-05	0.000325156
ENSG00000142875	PRKACB	4.32363	4.25509	4.44021	4.64796	4.69325	4.86754	4.94084	5.04939	5.02338	0.537436	4.72062	17.9709	2.24e-05	0.000325156
ENSG00000062038	CDH3	-1.43909	-0.592241	-0.961443	0.261323	0.476465	0.419203	-0.259178	-0.0897782	0.230071	1.21058	-0.0931808	17.9632	2.25e-05	0.000325793
ENSG00000147065	MSN	9.84635	9.87438	9.84364	10.4194	10.4405	10.3783	10.1612	10.1753	10.1627	0.440101	10.1626	17.9635	2.25e-05	0.000325793
ENSG00000144749	LRIG1	-0.823344	-0.778213	-0.415955	0.214138	0.00398547	0.139632	0.685851	0.645629	0.584689	1.1109	0.12622	17.9576	2.26e-05	0.000326397
ENSG00000127022	CANX	5.53258	5.48045	5.46639	5.85816	5.76063	5.89105	6.10048	6.04422	6.11327	0.474082	5.82593	17.9283	2.29e-05	0.000330748
ENSG00000100220	RTCB	7.65837	7.6601	7.62565	8.14527	8.15524	8.14543	7.9791	7.9731	7.92822	0.40955	7.93357	17.927	2.3e-05	0.000330798
ENSG00000170854	RIOX2	4.43549	4.25357	4.27579	4.75795	4.75793	4.77747	4.76353	4.71382	4.70664	0.423625	4.61894	17.8701	2.37e-05	0.000339822
ENSG00000088854	DNAAF9	2.06569	2.3718	2.18481	2.60342	2.74159	2.75599	2.88681	2.90681	2.95131	0.601457	2.63871	17.84	2.4e-05	0.000344541
ENSG00000162946	DISC1	-2.53559	-2.62667	-2.97263	-0.782115	-2.43645	-0.496109	-0.121643	0.815295	0.134184	2.86184	-0.65609	17.8391	2.4e-05	0.000344541
ENSG00000251301	LINC02384	-4.58787	-3.61362	-2.22969	-1.5141	-1.6087	-1.34033	-0.371682	-0.281867	-1.01711	2.74106	-1.35932	17.8313	2.41e-05	0.000345775
ENSG00000163001	CFAP36	3.61047	3.76971	3.77458	4.04354	4.26793	4.15279	4.6719	4.50764	4.58043	0.669638	4.19826	17.7867	2.47e-05	0.000353018
ENSG00000135318	NT5E	2.41161	2.45858	2.43423	2.89653	3.11633	3.12403	3.95839	4.01159	3.93799	1.15189	3.28951	17.7759	2.49e-05	0.000354656
ENSG00000164949	GEM	-4.58787	-4.58787	-4.58787	-3.07442	-3.59974	-3.05764	-2.58253	-2.33809	-2.81458	5.2513	-3.2351	17.743	2.53e-05	0.000360402
ENSG00000165704	HPRT1	5.52576	5.55496	5.48517	5.86485	5.7817	5.96319	6.17455	6.16376	6.12891	0.498778	5.87296	17.687	2.6e-05	0.00037022
ENSG00000168522	FNTA	4.66371	4.77492	4.77916	5.02899	5.2021	5.14951	5.13091	5.21552	5.25187	0.424874	5.03675	17.6713	2.63e-05	0.000373087
ENSG00000162729	IGSF8	6.23503	6.16432	6.26464	7.2954	7.16925	7.23351	6.6287	6.61544	6.68602	0.747081	6.76002	17.6693	2.63e-05	0.000373275
ENSG00000196704	AMZ2	5.56352	5.42361	5.46919	5.85143	5.8691	5.81663	6.24579	6.20444	6.16676	0.550842	5.87586	17.6621	2.64e-05	0.000374485
ENSG00000099290	WASHC2A	5.65692	5.63283	5.57815	5.91228	6.06294	5.92081	6.22821	6.25731	6.20118	0.481158	5.96074	17.6327	2.68e-05	0.000379711
ENSG00000137054	POLR1E	6.50168	6.5899	6.61084	7.04056	7.06888	6.92125	6.90155	6.88602	6.94018	0.393331	6.84191	17.6138	2.71e-05	0.000383087
ENSG00000094880	CDC23	6.06117	6.08811	6.10519	6.44437	6.49225	6.31796	6.66747	6.67372	6.64493	0.461313	6.40814	17.6085	2.71e-05	0.00038376
ENSG00000102007	PLP2	8.21253	8.24872	8.2449	8.93956	8.96058	8.97608	8.56574	8.58515	8.57247	0.544022	8.61987	17.5906	2.74e-05	0.000386753
ENSG00000011347	SYT7	5.48769	5.43301	5.48724	5.77321	5.85337	5.78308	5.95549	6.04038	6.0135	0.437721	5.7754	17.5866	2.75e-05	0.000387372
ENSG00000133216	EPHB2	-1.13271	-1.63324	-2.22969	0.214138	-0.218244	-0.963779	1.71378	1.49259	1.67089	2.72554	0.496513	17.5759	2.76e-05	0.000389346
ENSG00000152558	TMEM123	5.58269	5.45231	5.51526	5.95685	6.02267	6.10654	5.87765	5.8601	5.84516	0.430807	5.81837	17.5641	2.78e-05	0.000391553
ENSG00000172172	MRPL13	5.21606	5.33606	5.24516	5.69159	5.86607	5.69835	5.63174	5.62236	5.62326	0.425163	5.56334	17.5476	2.8e-05	0.000394553
ENSG00000164054	SHISA5	7.03552	7.02262	6.97717	7.46779	7.4255	7.4951	7.33699	7.33069	7.3136	0.384883	7.27953	17.5441	2.81e-05	0.000395066
ENSG00000166788	SAAL1	3.92003	3.79077	3.74256	4.26517	4.35124	4.33923	4.14375	4.22242	4.35086	0.462092	4.14285	17.5208	2.84e-05	0.000399523
ENSG00000099783	HNRNPM	8.97559	8.99435	8.98643	9.35607	9.35678	9.35247	9.30509	9.29963	9.31194	0.345098	9.22444	17.5169	2.85e-05	0.000400132
ENSG00000073905	VDAC1P1	5.1034	5.13665	5.11367	5.50571	5.4988	5.45343	5.49405	5.48886	5.6144	0.392204	5.39081	17.5142	2.85e-05	0.000400473
ENSG00000187134	AKR1C1	-3.5528	-4.58787	-2.55386	-1.87312	-1.6087	-1.07871	-0.773904	-1.85796	-0.423702	2.77225	-1.61982	17.5082	2.86e-05	0.000401311
ENSG00000115233	PSMD14	6.78319	6.84676	6.78034	7.12948	7.15545	7.08998	7.2165	7.24527	7.23223	0.375556	7.06463	17.4791	2.9e-05	0.000406637
ENSG00000131375	CAPN7	4.76209	4.57092	4.71933	5.00146	5.03308	5.11723	5.28883	5.23958	5.19953	0.464674	5.01168	17.4763	2.91e-05	0.000407038
ENSG00000186976	EFCAB6	3.57394	3.6318	3.62708	4.06198	3.94295	3.96969	4.17412	4.1873	4.20116	0.482864	3.94969	17.4477	2.95e-05	0.000412537
ENSG00000108384	RAD51C	4.63613	4.53767	4.44021	4.90541	4.96481	4.91618	5.03211	4.93251	4.99863	0.419242	4.83242	17.4333	2.98e-05	0.000415025
ENSG00000180817	PPA1	7.3425	7.27419	7.25049	7.6305	7.61049	7.61393	7.92096	7.92709	7.98243	0.500659	7.64181	17.4314	2.98e-05	0.000415223
ENSG00000172915	NBEA	-4.58787	-3.61362	-4.58787	-2.35219	-2.60571	-3.05764	-0.880858	-0.585676	-0.877295	4.33394	-1.92139	17.4181	3e-05	0.000417914
ENSG00000163453	IGFBP7	5.43991	5.41074	5.36565	5.7788	5.72035	5.75294	5.82757	5.80474	5.91054	0.394783	5.68045	17.4158	3e-05	0.000418204
ENSG00000173868	PHOSPHO1	-4.58787	-3.61362	-4.58787	-3.07442	-2.02274	-2.64959	-2.26024	-1.85796	-1.65233	3.44409	-2.60596	17.3987	3.03e-05	0.000421307
ENSG00000163785	RYK	5.80724	5.89109	5.87934	6.19571	6.16474	6.21497	6.45988	6.52169	6.41264	0.475621	6.19339	17.3815	3.06e-05	0.000424768
ENSG00000052841	TTC17	6.01763	6.01707	5.99012	6.33456	6.37628	6.37742	6.41466	6.38581	6.34375	0.36421	6.26091	17.3657	3.08e-05	0.000427792
ENSG00000135604	STX11	1.50276	1.53082	1.41078	2.13737	1.89635	2.03049	2.28955	2.05017	2.3275	0.652237	1.94362	17.3576	3.1e-05	0.000429164
ENSG00000168092	PAFAH1B2	6.46653	6.43232	6.36643	6.66109	6.81352	6.78356	7.03992	6.96525	6.95838	0.453749	6.74003	17.3335	3.14e-05	0.000434427
ENSG00000196586	MYO6	3.56333	3.6411	3.73329	4.03338	4.24943	4.01944	4.65525	4.69654	4.50257	0.739429	4.17868	17.3118	3.17e-05	0.000438262
ENSG00000223734	LAPTM4A-DT	-0.665263	-0.592241	-1.29946	0.307013	0.798251	0.74063	-0.154817	0.157535	0.230071	1.26273	0.087439	17.2946	3.2e-05	0.00044179
ENSG00000185721	DRG1	7.79203	7.83235	7.84706	8.35012	8.37476	8.30527	8.13542	8.14085	8.11576	0.417219	8.11504	17.2829	3.22e-05	0.00044404
ENSG00000165669	FAM204A	3.53646	3.28816	3.66417	3.97442	4.02498	3.84517	4.2741	4.24488	4.11378	0.584667	3.91788	17.2679	3.25e-05	0.000446646
ENSG00000173702	MUC13	6.16526	6.21739	6.23536	6.56681	6.64834	6.62389	7.2165	7.19214	7.1936	0.730692	6.73178	17.2679	3.25e-05	0.000446646
ENSG00000164466	SFXN1	7.31648	7.25272	7.30082	7.5808	7.56899	7.65385	7.83499	7.82346	7.78576	0.422036	7.58481	17.253	3.27e-05	0.000449932
ENSG00000151929	BAG3	4.93254	5.05632	4.92485	5.46094	5.39043	5.37234	5.35588	5.33058	5.31973	0.400315	5.25109	17.2516	3.27e-05	0.000450006
ENSG00000148229	POLE3	8.13068	8.09096	8.10588	8.43929	8.51911	8.46086	8.4282	8.4356	8.46007	0.348291	8.3505	17.2388	3.3e-05	0.000452588
ENSG00000234390	USP27X-DT	-2.95634	-4.58787	-3.56511	-2.09286	-1.15009	-0.963779	-0.996381	-2.65541	-1.3454	2.89399	-1.84949	17.2296	3.31e-05	0.000454562
ENSG00000136891	TEX10	5.68227	5.64965	5.75648	6.0027	6.19204	5.9995	6.51859	6.44099	6.41434	0.579751	6.10772	17.224	3.32e-05	0.000455485
ENSG00000167862	MRPL58	6.11165	6.0589	6.03234	6.64561	6.69094	6.66354	6.33848	6.39956	6.44339	0.469382	6.39703	17.2237	3.32e-05	0.000455485
ENSG00000075188	NUP37	5.4457	5.46218	5.3939	5.76147	5.86961	5.85432	5.75016	5.85378	5.80615	0.382752	5.70013	17.2003	3.36e-05	0.000460664
ENSG00000108592	FTSJ3	8.08979	8.08862	8.08358	8.5915	8.58128	8.60936	8.38656	8.37793	8.40035	0.407618	8.3714	17.1942	3.37e-05	0.000461892
ENSG00000153066	TXNDC11	6.23	6.31111	6.21467	6.73738	6.72899	6.66661	6.60226	6.55082	6.57323	0.392714	6.52574	17.1753	3.41e-05	0.000465786
ENSG00000117360	PRPF3	6.52408	6.60365	6.6181	6.92054	6.98891	6.83209	7.2161	7.19502	7.23584	0.490834	6.92749	17.1703	3.42e-05	0.000466773
ENSG00000158156	XKR8	2.45817	2.25542	2.17113	3.20483	3.07141	3.17196	2.68599	2.76898	2.8693	0.681092	2.78428	17.1459	3.46e-05	0.000472079
ENSG00000258913	LINC02691	1.23506	0.820795	0.915726	1.81253	1.56854	1.46999	2.22654	2.14237	2.07548	0.922312	1.6652	17.1304	3.49e-05	0.00047572
ENSG00000116649	SRM	7.60165	7.62271	7.64124	8.53427	8.51557	8.4914	7.95367	8.03014	8.00068	0.655881	8.09043	17.1166	3.52e-05	0.000478935
ENSG00000112110	MRPL18	6.54648	6.5376	6.50985	7.18176	7.18312	7.20366	6.89143	6.81325	6.86936	0.502319	6.88475	17.1123	3.52e-05	0.000479761
ENSG00000164902	PHAX	4.77824	4.90905	4.82574	5.18931	5.27478	5.18419	5.63659	5.69321	5.514	0.592168	5.25877	17.0949	3.56e-05	0.000483177
ENSG00000166192	SENP8	0.206795	0.00613244	-0.0210679	0.591784	0.815119	0.757481	1.03381	1.15589	0.927486	0.848532	0.665782	17.0962	3.55e-05	0.000483177
ENSG00000154447	SH3RF1	4.78282	4.90905	4.81699	5.24759	5.25018	5.22187	5.72359	5.84646	5.72756	0.690638	5.3318	17.0842	3.58e-05	0.000485679
ENSG00000234241	SYNCRIPP1	2.71939	2.93409	2.78346	3.25814	3.42181	3.16881	3.3231	3.4171	3.56466	0.550158	3.20326	17.0745	3.59e-05	0.000487646
ENSG00000124275	MTRR	6.22201	6.11591	6.24844	6.53656	6.61532	6.60306	7.13091	7.11092	7.12536	0.682382	6.68507	17.0554	3.63e-05	0.000491836
ENSG00000141682	PMAIP1	2.31373	2.10885	1.91623	2.50393	2.56339	2.94805	3.09869	3.21657	3.0983	0.813045	2.70703	17.0497	3.64e-05	0.000493052
ENSG00000286058	ENSG00000286058	-4.58787	-4.58787	-4.58787	-3.33014	-3.59974	-3.05764	-2.26024	-2.33809	-1.7711	5.60131	-3.02621	17.0348	3.67e-05	0.000496426
ENSG00000151689	INPP1	3.11044	3.07809	3.20864	3.53988	3.72822	3.43021	3.66715	3.77696	3.73777	0.519921	3.4987	17.0338	3.67e-05	0.000496449
ENSG00000115128	SF3B6	5.58793	5.64907	5.60511	6.16696	6.1226	6.08041	5.95014	5.90074	5.9609	0.419732	5.90697	17.0186	3.7e-05	0.000500179
ENSG00000162385	MAGOH	5.11978	5.08303	5.08113	5.66168	5.62313	5.74557	5.5453	5.28796	5.5384	0.479701	5.43122	17.0151	3.71e-05	0.000500831
ENSG00000115446	UNC50	5.44136	5.40119	5.42952	5.97864	5.97703	6.03189	5.77459	5.79918	5.68166	0.456044	5.74319	16.9991	3.74e-05	0.000504567
ENSG00000229644	NAMPTP1	3.86925	3.74834	3.78808	4.19247	4.31167	4.1496	4.78228	4.56231	4.5895	0.648031	4.26427	16.9901	3.76e-05	0.000506711
ENSG00000100372	SLC25A17	5.99905	6.0641	6.08982	6.48158	6.52945	6.47616	6.43605	6.35792	6.33973	0.387207	6.32064	16.9692	3.8e-05	0.000511782
ENSG00000180370	PAK2	7.1169	7.20253	7.17218	7.47813	7.46762	7.45982	7.66643	7.6892	7.65024	0.407824	7.44854	16.8829	3.98e-05	0.00053315
ENSG00000123358	NR4A1	5.0616	5.04059	5.01279	6.18619	6.16967	6.16217	5.42977	5.42866	5.58976	0.831771	5.64195	16.8699	4e-05	0.000536544
ENSG00000120784	ZFP30	-0.352409	-0.389129	-0.375243	0.351301	0.815119	0.165114	0.704469	1.25363	0.927486	1.15874	0.45993	16.8416	4.06e-05	0.000543673
ENSG00000153294	ADGRF4	-2.95634	-3.61362	-4.58787	-1.36334	-2.02274	-2.64959	0.811397	0.78292	0.766245	4.40981	-0.552797	16.8435	4.06e-05	0.000543673
ENSG00000173905	GOLIM4	5.72693	5.72762	5.7176	6.05468	6.20649	6.1954	6.03763	6.09826	6.05773	0.386251	5.99248	16.841	4.06e-05	0.000543673
ENSG00000152484	USP12	4.59765	4.56604	4.60697	4.94568	4.96764	4.98933	5.50339	5.38955	5.39234	0.627172	5.03657	16.8077	4.14e-05	0.000552445
ENSG00000115963	RND3	3.67102	3.65954	3.37001	4.13979	4.13318	4.2836	3.97382	4.09965	3.92849	0.526326	3.94363	16.803	4.15e-05	0.000553533
ENSG00000143727	ACP1	6.65414	6.7401	6.69987	7.14764	7.05541	7.11287	7.03648	7.04867	6.9841	0.366882	6.95301	16.7705	4.22e-05	0.000562241
ENSG00000162613	FUBP1	7.69589	7.66081	7.66446	7.93662	7.98227	8.00961	8.23303	8.23641	8.20487	0.432228	7.9758	16.7397	4.29e-05	0.000570583
ENSG00000104442	ARMC1	4.41055	4.16118	4.24837	4.68952	4.63626	4.76607	5.23782	5.25072	5.24327	0.720625	4.79409	16.7318	4.31e-05	0.000572698
ENSG00000131467	PSME3	8.98395	9.00701	8.99658	9.67619	9.70004	9.63348	9.30927	9.33211	9.29916	0.50704	9.35284	16.7291	4.31e-05	0.000573229
ENSG00000099246	RAB18	4.49811	4.54265	4.50571	4.86588	4.78814	4.94037	5.18825	5.15672	5.18365	0.514258	4.87759	16.7246	4.32e-05	0.000574054
ENSG00000101557	USP14	6.82653	6.88814	6.88093	7.1648	7.21505	7.24476	7.63857	7.60215	7.66372	0.572112	7.27079	16.7244	4.32e-05	0.000574054
ENSG00000167780	SOAT2	-4.58787	-4.58787	-4.58787	-2.66857	-2.60571	-2.33187	-2.99816	-3.63254	-3.44437	5.2404	-3.23677	16.7033	4.37e-05	0.000579883
ENSG00000101843	PSMD10	5.66872	5.60159	5.54274	5.90069	5.87062	6.08875	6.24142	6.25768	6.30712	0.516165	5.96882	16.6878	4.41e-05	0.000583767
ENSG00000123992	DNPEP	5.62156	5.56905	5.75017	6.67286	6.58399	6.66186	6.07835	6.04166	6.0424	0.728363	6.17253	16.6802	4.42e-05	0.000585817
ENSG00000163539	CLASP2	5.07753	5.23058	5.0738	5.4508	5.55071	5.4437	5.84446	5.79918	5.85334	0.539095	5.50976	16.6603	4.47e-05	0.000590234
ENSG00000166387	PPFIBP2	-1.35618	-0.828709	-0.84568	-0.36895	-0.0257415	0.286179	1.39642	1.13039	1.20427	1.82037	0.360495	16.6343	4.53e-05	0.000598072
ENSG00000128581	IFT22	4.83227	4.77809	4.80153	5.34389	5.45911	5.27623	5.18411	5.11344	5.14111	0.454797	5.12217	16.6171	4.57e-05	0.000603217
ENSG00000286781	ENSG00000286781	-2.95634	-2.30737	-3.56511	-0.333463	-0.400953	0.0329509	-1.41162	-2.07815	-1.09244	2.51151	-1.1301	16.6146	4.58e-05	0.000603723
ENSG00000107372	ZFAND5	1.48037	1.46945	1.62661	2.48914	2.12323	2.1048	1.95055	2.14237	2.4848	0.709324	2.03095	16.6099	4.59e-05	0.000604914
ENSG00000108559	NUP88	6.64159	6.71553	6.68731	6.96708	7.07524	6.93543	7.21833	7.20403	7.21793	0.426044	6.97928	16.5845	4.65e-05	0.000612464
ENSG00000196236	XPNPEP3	4.88966	4.78125	4.87931	5.30078	5.27096	5.30517	5.28961	5.28073	5.09198	0.408515	5.13505	16.5752	4.68e-05	0.00061487
ENSG00000170876	TMEM43	5.42167	5.38119	5.43454	6.14943	6.21565	6.11064	5.83128	5.70621	5.74728	0.562449	5.81048	16.5728	4.68e-05	0.000615317
ENSG00000167461	RAB8A	4.54874	4.53892	4.47959	5.08744	5.02586	5.13265	4.86322	4.85189	4.86562	0.453965	4.84009	16.5666	4.7e-05	0.000617026
ENSG00000119929	CUTC	5.27739	5.32455	5.29015	5.83836	5.80353	5.81109	5.61953	5.57765	5.6524	0.423751	5.59307	16.5586	4.72e-05	0.000619327
ENSG00000136720	HS6ST1	4.80438	4.59507	4.74148	5.45397	5.34905	5.3812	5.02287	5.14244	5.0608	0.529504	5.08924	16.5465	4.75e-05	0.000622998
ENSG00000166963	MAP1A	0.122577	0.268815	0.237047	1.6087	1.74614	2.15017	0.776627	1.13039	0.96513	1.29658	1.16979	16.5455	4.75e-05	0.00062303
ENSG00000121022	COPS5	4.91074	4.92438	4.81808	5.21275	5.24007	5.20277	5.50803	5.44298	5.40181	0.454922	5.20355	16.5114	4.84e-05	0.000633678
ENSG00000106993	CDC37L1	2.64587	2.5204	2.69063	3.06888	3.21812	3.22138	3.09517	2.96929	3.18061	0.510412	2.97809	16.4941	4.88e-05	0.000638547
ENSG00000148153	INIP	4.18517	4.15956	4.0719	4.42004	4.48637	4.62399	4.81156	4.6658	4.79291	0.501365	4.49203	16.4843	4.91e-05	0.000641556
ENSG00000117877	POLR1G	1.88151	1.7954	1.84048	2.80396	2.61727	2.60125	2.54848	2.07712	2.45865	0.701331	2.33812	16.4818	4.91e-05	0.000642061
ENSG00000253227	ENSG00000253227	0.608779	0.531555	0.665556	1.27108	1.17009	1.33057	1.37333	1.66237	1.13989	0.750424	1.13201	16.4792	4.92e-05	0.000642652
ENSG00000138385	SSB	4.36851	4.34468	4.26617	4.72467	4.79878	4.60083	4.80726	4.76133	4.75176	0.415821	4.61678	16.471	4.94e-05	0.000645078
ENSG00000158458	NRG2	-0.768703	-0.427528	0.0100002	1.51447	1.14363	1.2848	0.276985	0.590579	0.535491	1.36715	0.645262	16.4607	4.97e-05	0.00064797
ENSG00000037241	RPL26L1	4.34392	4.39644	4.3214	5.25051	5.27325	5.13104	4.78447	4.74356	4.68565	0.646054	4.81467	16.4566	4.98e-05	0.000649058
ENSG00000188295	ZNF669	-3.5528	-4.58787	-3.56511	-2.35219	-2.60571	-2.33187	-0.493706	-0.765516	-0.877295	3.54013	-1.79907	16.4513	4.99e-05	0.000650227
ENSG00000178660	ARMC10P1	0.233809	0.268815	-0.29711	0.628238	1.24669	1.00333	1.39642	0.846958	0.96513	0.96969	0.784543	16.4471	5e-05	0.000651347
ENSG00000253785	ENSG00000253785	4.64118	4.66631	4.70278	4.95916	5.00579	5.04872	5.19814	5.24478	5.295	0.460707	4.99293	16.4442	5.01e-05	0.000652019
ENSG00000177453	NIM1K	-1.20342	-1.31263	-1.15462	-0.405331	-0.218244	-0.309059	-0.333198	-0.352034	-0.329542	0.965362	-0.564514	16.4274	5.05e-05	0.00065653
ENSG00000160190	SLC37A1	5.0738	4.96663	5.07747	5.74444	5.68236	5.63764	5.35146	5.38349	5.39665	0.502067	5.39304	16.4187	5.08e-05	0.000659257
ENSG00000224578	HNRNPA1L3	7.90637	7.83312	7.79645	8.27774	8.26424	8.31882	8.20327	8.10928	8.14399	0.375529	8.10686	16.4103	5.1e-05	0.000661848
ENSG00000122484	RPAP2	3.51459	3.43717	3.29946	3.84489	3.90011	3.75155	4.31405	4.31872	4.2439	0.662914	3.89232	16.4076	5.11e-05	0.000662456
ENSG00000213585	VDAC1	9.26652	9.24381	9.25805	9.52554	9.56041	9.55445	9.68856	9.68149	9.67161	0.359126	9.50521	16.3953	5.14e-05	0.000666436
ENSG00000136754	ABI1	4.33927	4.66517	4.33985	4.83892	4.79134	4.93204	5.26159	5.18565	5.18365	0.587816	4.87332	16.3651	5.22e-05	0.000676503
ENSG00000175920	DOK7	-0.616197	-1.63324	-1.96516	0.165358	-0.362513	-0.0822535	1.74109	1.60796	1.93078	2.52442	0.652788	16.3547	5.25e-05	0.000679204
ENSG00000213236	YWHAZP2	3.52009	3.38273	3.75178	3.95123	3.98827	3.98944	4.15055	4.31023	4.1833	0.543314	3.94228	16.3149	5.36e-05	0.000692965
ENSG00000248664	ENSG00000248664	-0.274208	-0.466977	0.0993812	0.456414	0.538719	0.635172	0.568796	0.732955	0.655477	0.825639	0.380987	16.3126	5.37e-05	0.000693111
ENSG00000291156	ENSG00000291156	-1.82858	-2.30737	-1.54826	0.165358	0.0331122	0.0872774	-0.259178	-0.672795	-1.5426	1.76552	-0.60695	16.3131	5.37e-05	0.000693111
ENSG00000147649	MTDH	6.66224	6.65049	6.57687	6.93902	7.01948	6.99726	7.49673	7.45629	7.49161	0.624619	7.07511	16.284	5.45e-05	0.000702639
ENSG00000148019	CEP78	4.51472	4.48438	4.44874	4.77938	4.91189	4.84899	5.30494	5.29587	5.25757	0.601307	4.90962	16.2684	5.5e-05	0.000708105
ENSG00000101558	VAPA	6.88282	6.92314	6.88905	7.15897	7.22356	7.22805	7.29346	7.33121	7.32087	0.362237	7.14971	16.2585	5.53e-05	0.000711102
ENSG00000171566	PLRG1	5.25119	5.20571	5.1083	5.49834	5.59411	5.47142	5.81049	5.79513	5.73439	0.467717	5.5174	16.2335	5.6e-05	0.000719487
ENSG00000172409	CLP1	5.08311	5.06845	5.10201	5.47976	5.52146	5.54908	5.37198	5.46483	5.41547	0.384324	5.35146	16.2273	5.62e-05	0.000721524
ENSG00000165506	DNAAF2	3.4613	3.62243	3.39964	3.9037	3.858	3.88788	4.05404	4.06473	4.01852	0.470009	3.82677	16.218	5.65e-05	0.000724717
ENSG00000101076	HNF4A	-1.94493	-3.61362	-1.37772	-0.442654	-0.909418	-0.758199	-0.259178	-0.585676	-0.00446324	1.76677	-0.833454	16.1894	5.73e-05	0.000734289
ENSG00000181444	ZNF467	1.18057	1.33828	1.60643	2.05942	2.19586	1.68783	2.26468	2.19253	2.46523	0.783791	1.94572	16.1771	5.77e-05	0.000738372
ENSG00000232951	IPO7P1	-1.0653	-1.1756	-0.961443	0.114871	-0.440445	-0.240539	-0.0574982	-0.151009	0.31998	1.06792	-0.32428	16.1758	5.77e-05	0.000738513
ENSG00000035681	NSMAF	5.47713	5.45824	5.5697	5.76249	5.87414	5.82714	6.04221	5.99738	6.02802	0.423441	5.79799	16.1667	5.8e-05	0.000741344
ENSG00000083544	TDRD3	3.48398	3.46626	3.26768	3.75708	3.75031	3.9515	3.91308	3.99578	3.99824	0.489734	3.75267	16.1616	5.82e-05	0.000742986
ENSG00000133641	RLIG1	3.06979	3.29112	3.24827	4.26227	4.20533	4.1416	3.69069	3.5696	3.66815	0.747475	3.74329	16.1449	5.87e-05	0.000748136
ENSG00000172889	EGFL7	4.91804	4.9914	4.96801	6.21794	5.96904	6.06272	5.36176	5.41618	5.41036	0.824016	5.55693	16.142	5.88e-05	0.000748941
ENSG00000254670	RASSF10-DT	4.07558	4.14	4.32757	4.66122	4.49947	4.63315	4.72302	4.69001	4.55751	0.445457	4.49607	16.1389	5.89e-05	0.000749432
ENSG00000170759	KIF5B	6.08594	6.04932	6.03187	6.73816	6.75572	6.71405	6.37925	6.36067	6.38816	0.51177	6.41616	16.1333	5.9e-05	0.000750914
ENSG00000107566	ERLIN1	6.5162	6.51247	6.44951	6.79037	6.80405	6.79177	7.06715	7.0721	7.06975	0.446054	6.80511	16.1301	5.91e-05	0.000751844
ENSG00000163900	TMEM41A	5.03593	5.21119	5.11814	5.50755	5.47843	5.55331	5.4609	5.51312	5.50684	0.380342	5.38776	16.1214	5.94e-05	0.000754932
ENSG00000117262	GPR89A	2.74308	2.97146	2.89584	3.38339	3.4052	3.3547	3.3588	3.40386	3.20048	0.482005	3.21041	16.1198	5.95e-05	0.000755215
ENSG00000168646	AXIN2	-4.58787	-3.61362	-2.97263	-2.35219	-1.15009	-1.85127	-1.67481	-1.34737	-2.37764	2.57201	-2.10381	16.0914	6.04e-05	0.000764794
ENSG00000117543	DPH5	5.77197	5.64213	5.72406	6.15139	6.04473	6.05848	6.03855	6.11624	6.07666	0.368249	5.96908	16.0894	6.04e-05	0.000765203
ENSG00000243716	NPIPB5	-4.58787	-4.58787	-4.58787	-3.07442	-2.60571	-2.64959	-3.58431	-3.06278	-3.44437	5.02816	-3.3676	16.0821	6.07e-05	0.000767829
ENSG00000135018	UBQLN1	6.92694	6.91477	6.88748	7.29752	7.25461	7.32078	7.84118	7.93827	7.89919	0.713833	7.42244	16.0136	6.29e-05	0.000794579
ENSG00000131459	GFPT2	4.14482	4.16118	4.15243	4.64017	4.50598	4.42742	4.71615	4.9102	4.91815	0.545962	4.53814	16.0124	6.29e-05	0.000794699
ENSG00000076650	GPATCH1	3.48679	3.79077	3.64945	4.0042	4.07835	4.03161	4.37634	4.37411	4.26669	0.550078	4.03605	15.9918	6.36e-05	0.000802643
ENSG00000159593	NAE1	5.03112	4.99685	5.05716	5.30501	5.40582	5.35791	5.44922	5.47942	5.53136	0.395005	5.30337	15.9808	6.4e-05	0.000806411
ENSG00000290862	NMRAL2P	-0.200029	0.361814	-0.591371	1.23608	0.988703	0.774137	0.441398	0.96709	1.13989	1.06313	0.677529	15.9802	6.4e-05	0.000806411
ENSG00000175029	CTBP2	5.88812	5.87885	5.87513	6.17199	6.14278	6.25891	6.43327	6.4819	6.49818	0.457868	6.20137	15.9774	6.41e-05	0.000807215
ENSG00000197099	HRG-AS1	-1.43909	-1.82494	-1.15462	0.0625522	-0.184323	-0.578294	-0.72326	0.278576	-0.329542	1.34673	-0.506565	15.967	6.45e-05	0.000811282
ENSG00000138459	SLC35A5	4.05679	4.13342	3.96299	4.33988	4.4758	4.4548	4.82651	4.85384	4.82525	0.592408	4.47274	15.9523	6.5e-05	0.000816827
ENSG00000100722	ZC3H14	5.00097	5.08132	5.1775	5.39899	5.45239	5.43129	5.77018	5.82177	5.71795	0.521235	5.45562	15.947	6.51e-05	0.000818706
ENSG00000179152	TCAIM	4.19723	4.10344	4.03839	4.45597	4.49031	4.4804	4.8899	4.85482	4.75042	0.551629	4.50391	15.9431	6.53e-05	0.000820015
ENSG00000107625	DDX50	4.12872	4.2566	4.22539	4.5587	4.70122	4.51673	5.13005	5.11019	4.99067	0.652708	4.67002	15.9303	6.57e-05	0.000824791
ENSG00000102910	LONP2	5.96469	6.04099	5.91311	6.25301	6.38231	6.29181	6.73185	6.6453	6.727	0.545459	6.35927	15.8973	6.69e-05	0.000837318
ENSG00000109956	B3GAT1	-4.58787	-4.58787	-4.58787	-3.07442	-1.80092	-2.33187	-2.58253	-2.07815	-4.58787	5.72203	-2.90509	15.8947	6.7e-05	0.000838083
ENSG00000164924	YWHAZ	9.63905	9.59228	9.55542	9.85184	9.89175	10.0175	10.338	10.3085	10.3437	0.544528	9.98079	15.8904	6.71e-05	0.000839591
ENSG00000064102	INTS13	5.71858	5.73633	5.73223	6.02295	6.09739	5.99728	6.36139	6.28141	6.2775	0.450811	6.04455	15.8688	6.79e-05	0.000848809
ENSG00000102038	SMARCA1	-3.5528	-2.30737	-1.96516	-1.5141	-0.288576	-1.49139	-0.674334	-0.151009	-0.329542	2.07432	-1.04106	15.8512	6.85e-05	0.000855862
ENSG00000071127	WDR1	8.56822	8.59872	8.59133	9.6994	9.64476	9.6754	8.95847	8.98726	9.0103	0.783971	9.15292	15.8469	6.87e-05	0.000857054
ENSG00000137760	ALKBH8	2.23569	2.40496	2.2898	2.76356	2.58813	2.92959	3.01912	3.06999	2.98834	0.593423	2.73114	15.8425	6.88e-05	0.00085827
ENSG00000099901	RANBP1	8.04509	8.00279	8.01105	8.75857	8.74075	8.69029	8.35478	8.31245	8.33749	0.526418	8.39105	15.8314	6.92e-05	0.00086287
ENSG00000101311	FERMT1	5.18005	5.20649	5.32222	5.4965	5.57505	5.62162	5.85387	5.87313	5.86894	0.485743	5.57863	15.8306	6.93e-05	0.00086287
ENSG00000135525	MAP7	5.19903	5.21275	5.34752	5.6272	5.63802	5.49735	5.86011	5.93337	5.84894	0.488124	5.59744	15.8287	6.93e-05	0.000862902
ENSG00000152527	PLEKHH2	-2.21024	-2.04608	-2.22969	-1.10217	-1.15009	-1.07871	0.588976	0.132058	0.260667	2.15382	-0.630738	15.8294	6.93e-05	0.000862902
ENSG00000143622	RIT1	3.38201	3.39654	3.41423	3.72167	3.79988	3.81329	3.9545	3.82147	3.92133	0.44392	3.70753	15.8231	6.95e-05	0.000865003
ENSG00000157895	C12orf43	5.23373	5.12343	5.15422	5.63562	5.56137	5.60018	5.48869	5.49262	5.51876	0.379938	5.43491	15.8077	7.01e-05	0.000871338
ENSG00000164182	NDUFAF2	4.55545	4.58546	4.58393	5.08907	4.95533	4.90205	5.05677	4.9481	4.89029	0.401297	4.85407	15.8009	7.04e-05	0.000874046
ENSG00000104419	NDRG1	7.13783	7.09911	7.11974	7.57731	7.47145	7.51738	7.46005	7.41843	7.39299	0.355414	7.36527	15.792	7.07e-05	0.000877341
ENSG00000213551	DNAJC9	4.61445	4.5414	4.59678	4.90355	4.8981	4.9246	5.11794	5.08219	5.06406	0.417214	4.87526	15.7906	7.08e-05	0.00087757
ENSG00000179456	ZBTB18	0.433442	0.406158	0.741567	1.13836	1.11667	1.26137	1.174	1.20559	1.20427	0.664304	0.998854	15.7864	7.09e-05	0.000879095
ENSG00000064655	EYA2	-4.58787	-4.58787	-4.58787	-1.87312	-3.59974	-2.1959	-3.58431	-3.06278	-2.57963	5.51358	-3.05999	15.7719	7.15e-05	0.000884614
ENSG00000121486	TRMT1L	3.65612	3.59874	3.64698	3.98325	4.00674	4.02988	4.13348	4.30454	4.38251	0.514805	3.99613	15.7597	7.19e-05	0.000889701
ENSG00000188856	RPSAP47	4.88541	4.89356	4.79486	5.293	5.10771	5.43456	5.35588	5.19721	5.29869	0.426811	5.15641	15.7593	7.19e-05	0.000889701
ENSG00000090470	PDCD7	5.33154	5.34107	5.35737	5.81878	5.89214	5.75818	5.72017	5.58177	5.69713	0.404996	5.62532	15.7158	7.36e-05	0.000908701
ENSG00000197753	LHFPL5	-4.58787	-4.58787	-4.58787	-2.66857	-2.28498	-3.62872	-1.77441	-3.63254	-2.81458	5.53423	-3.05703	15.7148	7.36e-05	0.000908745
ENSG00000110696	C11orf58	5.90765	5.91622	5.87565	6.12891	6.16803	6.3764	6.50737	6.50844	6.52953	0.479149	6.23623	15.6788	7.51e-05	0.000925342
ENSG00000065833	ME1	4.85854	4.90713	4.81369	5.19843	5.1803	5.16222	5.47791	5.39425	5.46393	0.459053	5.18176	15.6717	7.53e-05	0.000928399
ENSG00000006016	CRLF1	4.71972	4.81762	4.72285	5.49094	5.3323	5.37029	5.03211	5.08634	5.15645	0.500775	5.10606	15.6291	7.71e-05	0.000946895
ENSG00000155636	RBM45	2.99676	2.9303	2.82336	3.28122	3.31321	3.39025	3.71155	3.47904	3.49881	0.536163	3.29567	15.6116	7.78e-05	0.000955284
ENSG00000013561	RNF14	4.04921	3.78028	3.7836	4.28813	4.3176	4.29085	4.89396	4.83916	4.94194	0.750504	4.41622	15.6068	7.8e-05	0.000956813
ENSG00000227087	RBMX2P5	0.971779	0.85319	0.813772	1.39261	1.47611	1.3966	1.52767	1.55143	1.76993	0.651681	1.33885	15.6024	7.82e-05	0.000958576
ENSG00000124762	CDKN1A	6.37318	6.33388	6.34069	6.67313	6.60778	6.73414	6.99833	7.1239	7.0345	0.526209	6.72042	15.5931	7.85e-05	0.000962886
ENSG00000065615	CYB5R4	2.58946	2.48982	2.62692	3.02854	2.96585	3.13375	3.07026	2.95483	3.12349	0.480467	2.90527	15.5767	7.92e-05	0.000970839
ENSG00000151632	AKR1C2	-4.58787	-4.58787	-4.58787	-2.66857	-2.60571	-2.07165	-4.58787	-2.07815	-2.57963	5.63224	-2.97921	15.5743	7.93e-05	0.000971622
ENSG00000136932	TRMO	4.68833	4.72109	4.69325	5.08334	5.11709	5.09834	5.11447	5.03572	4.99863	0.374923	4.96102	15.5598	7.99e-05	0.00097861
ENSG00000127804	METTL16	6.52886	6.60841	6.65266	6.94128	6.94887	6.92824	6.95452	6.94138	6.92175	0.341956	6.8342	15.5559	8.01e-05	0.00098017
ENSG00000119977	TCTN3	6.47999	6.52635	6.62156	6.9909	7.00485	6.94005	6.8371	6.84348	6.86594	0.371692	6.80184	15.5391	8.08e-05	0.000988011
ENSG00000165355	FBXO33	3.0241	3.32327	3.0607	3.55416	3.57573	3.50695	3.91508	3.90657	3.94271	0.604497	3.57106	15.5274	8.13e-05	0.000993691
ENSG00000128595	CALU	8.37159	8.40618	8.40822	8.66579	8.75544	8.69938	9.12715	9.10998	9.10094	0.528825	8.76854	15.5154	8.18e-05	0.000999571
ENSG00000236393	LINC03099	-1.13271	-1.31263	-0.545477	0.114871	0.518265	0.616822	0.373216	0.0253995	-0.524441	1.26531	-0.0569993	15.5136	8.19e-05	0.00100004
ENSG00000106615	RHEB	6.20292	6.26595	6.28819	6.83125	6.81168	6.79177	6.53559	6.58055	6.5311	0.433921	6.5559	15.4925	8.28e-05	0.00101084
ENSG00000179021	C3orf38	2.68064	2.8996	3.08279	3.32074	3.31321	3.36298	3.64804	3.5696	3.78852	0.616291	3.33401	15.4767	8.35e-05	0.0010179
ENSG00000171208	NETO2	5.2245	5.4087	5.22213	5.61135	5.64452	5.66134	5.86529	5.78086	5.64154	0.416188	5.578	15.4582	8.44e-05	0.00102604
ENSG00000082212	ME2	5.29994	5.31732	5.23039	5.57388	5.65978	5.59375	6.03671	5.91201	5.94568	0.51581	5.6463	15.4556	8.45e-05	0.00102649
ENSG00000176845	METRNL	2.16727	1.97541	2.21178	2.99054	2.87225	2.79324	2.46359	2.66179	2.57886	0.622427	2.56096	15.4564	8.44e-05	0.00102649
ENSG00000103591	AAGAB	6.37545	6.35206	6.3668	6.63948	6.68235	6.66382	6.80052	6.75472	6.78833	0.358151	6.6131	15.4404	8.51e-05	0.00103428
ENSG00000157240	FZD1	2.72891	2.86825	2.96486	3.16196	3.35418	3.39025	3.41922	3.67479	3.77269	0.620982	3.29769	15.4386	8.52e-05	0.00103483
ENSG00000173706	HEG1	7.47789	7.53697	7.51681	7.94827	7.89188	7.90679	8.63425	8.68277	8.63429	0.818853	8.10457	15.4306	8.56e-05	0.00103827
ENSG00000185418	TARS3	1.80251	1.46945	1.98038	2.39178	2.25269	2.33552	3.13689	3.1515	2.97456	1.00082	2.49606	15.4138	8.64e-05	0.00104703
ENSG00000157388	CACNA1D	-2.73068	-1.05047	-1.74171	-0.106852	-1.02474	-0.0822535	1.80287	0.815295	1.40935	2.61423	0.303484	15.3928	8.73e-05	0.00105776
ENSG00000183780	SLC35F3	3.07354	3.34905	2.89584	3.71956	3.63393	3.7325	3.7389	3.49661	3.54615	0.53092	3.49222	15.3766	8.81e-05	0.00106634
ENSG00000144848	ATG3	5.29032	5.52134	5.48586	5.79743	5.8088	5.74451	5.8281	5.92783	5.8502	0.391336	5.70826	15.3481	8.94e-05	0.00108113
ENSG00000151917	BEND6	0.854838	0.975951	0.704062	1.43439	1.85617	1.23755	1.7942	1.84594	1.47605	0.790103	1.41194	15.3378	8.99e-05	0.00108652
ENSG00000169635	HIC2	3.53102	3.89169	3.65683	4.61655	4.61715	4.51673	4.15394	4.08976	4.07772	0.666227	4.17659	15.3357	9e-05	0.00108716
ENSG00000127129	EDN2	1.9564	1.31521	1.56518	3.65257	3.70125	3.83726	2.36171	2.37735	2.31297	1.57752	2.8444	15.3325	9.02e-05	0.00108807
ENSG00000310419	ENSG00000310419	-3.5528	-3.61362	-3.56511	-0.36895	0.144072	-0.0525786	-3.58431	-1.66698	-1.7711	3.62179	-1.22445	15.3313	9.02e-05	0.00108827
ENSG00000143436	MRPL9	6.13871	6.25311	6.16205	6.88802	6.91064	6.8915	6.54724	6.48631	6.4739	0.528058	6.55787	15.313	9.11e-05	0.00109788
ENSG00000104375	STK3	3.98706	3.64804	3.97682	4.31494	4.22598	4.27923	4.66241	4.70196	4.73552	0.624972	4.32293	15.3103	9.12e-05	0.00109895
ENSG00000154719	MRPL39	4.84765	4.70343	4.79486	5.27011	5.17541	5.00441	5.25766	5.24404	5.18763	0.410065	5.06863	15.2977	9.18e-05	0.00110531
ENSG00000145247	OCIAD2	3.39404	3.44251	3.38786	3.68753	3.81463	3.87636	3.85802	3.97623	4.09055	0.481529	3.7459	15.2945	9.2e-05	0.0011061
ENSG00000250453	ENSG00000250453	-4.58787	-3.03734	-4.58787	-1.04365	-3.59974	-1.34033	-1.18911	-1.66698	-1.17193	3.40564	-1.92654	15.2947	9.2e-05	0.0011061
ENSG00000142185	TRPM2	5.06442	5.06845	5.00703	6.02166	6.01994	6.02756	5.42557	5.32918	5.52271	0.709878	5.55618	15.2903	9.22e-05	0.00110712
ENSG00000143341	HMCN1	-2.95634	-1.46405	-1.02301	-0.560792	-0.288576	-0.621211	0.22635	0.0253995	0.134184	1.57702	-0.492809	15.2838	9.25e-05	0.00111042
ENSG00000260496	ENSG00000260496	-4.58787	-4.58787	-4.58787	-3.64117	-3.59974	-2.83924	-1.99697	-2.65541	-2.81458	5.30805	-3.2031	15.2702	9.32e-05	0.00111731
ENSG00000255650	FAM222A-AS1	-3.22396	-3.03734	-2.97263	-2.09286	-1.36125	-1.95726	-1.77441	-1.49834	-1.25606	1.8247	-1.97458	15.2467	9.43e-05	0.00112936
ENSG00000154814	OXNAD1	4.14126	4.21981	4.15937	4.42264	4.6075	4.56778	4.58163	4.66358	4.64564	0.410035	4.45946	15.243	9.45e-05	0.00113108
ENSG00000137494	ANKRD42	3.2493	3.18057	3.27729	3.80961	3.76123	3.83924	3.73438	3.78106	3.41968	0.497614	3.58454	15.2308	9.51e-05	0.00113739
ENSG00000124145	SDC4	6.86511	6.79168	6.83043	7.60915	7.62909	7.65652	7.11317	7.21298	7.14395	0.584791	7.24416	15.2295	9.52e-05	0.00113766
ENSG00000175592	FOSL1	4.68344	4.7823	4.73916	6.00919	6.06691	5.92734	5.19073	5.15514	5.18962	0.914035	5.40356	15.2257	9.54e-05	0.00113944
ENSG00000107643	MAPK8	3.86493	3.986	3.84519	4.4304	4.38552	4.37379	4.49872	4.25229	4.15711	0.45528	4.21825	15.2041	9.65e-05	0.00115102
ENSG00000133731	IMPA1	3.80315	3.67548	3.76778	4.3644	4.39817	4.78263	4.04128	4.14175	4.40494	0.62699	4.19531	15.204	9.65e-05	0.00115102
ENSG00000163743	RCHY1	2.85171	2.88792	2.88331	3.49123	3.32208	3.34358	3.26784	3.33015	3.22783	0.46135	3.19602	15.2019	9.66e-05	0.00115176
ENSG00000165417	GTF2A1	4.41203	4.28211	4.31052	4.5385	4.71251	4.89445	4.93691	4.79621	4.90368	0.468058	4.66372	15.1878	9.73e-05	0.00115936
ENSG00000080546	SESN1	3.30768	3.18376	3.3213	3.58463	3.7371	3.61952	3.8909	3.89336	3.77798	0.484975	3.61163	15.1862	9.74e-05	0.00115982
ENSG00000115310	RTN4	7.8928	7.90622	7.87831	8.1781	8.17089	8.16223	8.39966	8.41008	8.42399	0.403394	8.17352	15.1839	9.75e-05	0.00116074
ENSG00000101888	NXT2	2.1101	2.11554	1.89974	2.59883	2.30736	2.73913	2.64802	2.66179	2.67286	0.569759	2.44608	15.1643	9.86e-05	0.00117033
ENSG00000120963	ZNF706	5.2782	5.30053	5.27903	5.79091	5.69095	5.69124	5.61215	5.58294	5.59577	0.377011	5.54763	15.1641	9.86e-05	0.00117033
ENSG00000169490	TM2D2	5.89024	5.89887	5.90642	6.59471	6.53932	6.51322	6.20183	6.17667	6.23094	0.488633	6.2417	15.1665	9.84e-05	0.00117033
ENSG00000107959	PITRM1	1.44613	1.4902	1.28941	2.01193	2.18941	1.91508	1.82856	2.01575	1.95904	0.586725	1.82289	15.1391	9.99e-05	0.00118379
ENSG00000101346	POFUT1	7.60019	7.62915	7.58222	8.35794	8.38768	8.35654	7.90079	7.92477	7.92926	0.556446	7.99762	15.1275	0.000100491	0.00119005
ENSG00000137364	TPMT	-4.58787	-4.58787	-4.58787	-2.85727	-2.28498	-2.83924	-4.00053	-2.20227	-3.44437	5.32823	-3.17627	15.0962	0.000102169	0.00120787
ENSG00000161057	PSMC2	2.0353	2.15505	1.75136	2.45403	2.53312	2.65169	2.55362	2.52657	2.46523	0.545815	2.37371	15.0759	0.000103274	0.00121919
ENSG00000146281	PM20D2	4.48973	4.53892	4.41432	4.73932	4.77635	4.94313	5.15141	5.07803	5.03449	0.480226	4.81876	15.0678	0.000103718	0.00122388
ENSG00000148688	RPP30	5.03785	5.01665	5.02235	5.36564	5.36273	5.31445	5.44438	5.45908	5.38975	0.364933	5.27862	15.0563	0.000104354	0.00122974
ENSG00000151012	SLC7A11	1.51382	1.50046	1.21137	1.75599	1.99587	2.11137	2.11962	2.17392	1.99588	0.623644	1.8544	15.0563	0.000104354	0.00122974
ENSG00000060566	CREB3L3	-4.58787	-4.58787	-3.56511	-1.29348	-2.60571	-3.05764	-1.77441	-2.65541	-2.04273	3.52321	-2.53033	15.0481	0.000104805	0.00123396
ENSG00000139211	AMIGO2	2.83857	3.01863	3.0607	3.43832	3.43278	3.56314	4.38358	4.32857	4.45871	1.03343	3.7362	15.0481	0.000104803	0.00123396
ENSG00000269556	TMEM185A	2.79389	2.33786	2.49039	3.03873	3.28321	3.1625	3.04126	2.99425	3.07697	0.553657	2.94186	15.0447	0.000104997	0.00123566
ENSG00000122566	HNRNPA2B1	10.1457	10.1142	10.1065	10.3966	10.415	10.4651	10.5422	10.4304	10.449	0.328301	10.3491	15.041	0.000105201	0.00123751
ENSG00000120742	SERP1	6.73348	6.72103	6.70343	7.00331	6.98403	7.02666	7.13134	7.20575	7.22182	0.379342	6.98296	15.0263	0.000106023	0.00124553
ENSG00000133059	DSTYK	5.46007	5.50741	5.64462	5.94471	5.81405	5.86893	5.9171	5.97829	5.9574	0.375236	5.80001	15.0113	0.000106868	0.00125438
ENSG00000169891	REPS2	2.39973	2.39399	2.47933	2.76356	2.99944	2.82955	3.1127	3.26426	2.9419	0.573887	2.8291	15.0113	0.000106871	0.00125438
ENSG00000137168	PPIL1	6.16833	6.2294	6.11191	6.53176	6.52434	6.47202	6.51826	6.47622	6.56674	0.344621	6.40928	14.9832	0.00010847	0.00127144
ENSG00000020633	RUNX3	2.91567	3.30582	3.02693	3.98676	3.98827	3.91442	3.35586	3.69015	3.53681	0.675041	3.57417	14.9824	0.000108521	0.00127148
ENSG00000133028	SCO1	5.03785	5.09324	5.12968	5.49032	5.42792	5.36892	5.40579	5.52601	5.57614	0.380372	5.35165	14.963	0.00010964	0.00128243
ENSG00000084090	STARD7	8.24224	8.23477	8.26002	8.79736	8.89516	8.87433	8.56884	8.53021	8.50279	0.458549	8.56695	14.9612	0.000109743	0.00128296
ENSG00000125485	DDX31	5.99116	6.14073	6.03518	6.45361	6.45742	6.39603	6.41501	6.36512	6.36503	0.352268	6.30112	14.9591	0.00010987	0.00128387
ENSG00000169570	DTWD2	4.25276	4.28805	4.22042	4.46734	4.59046	4.79288	5.0685	5.02278	4.92771	0.574794	4.66082	14.9567	0.000110006	0.00128489
ENSG00000275052	PPP4R3B	5.51272	5.5611	5.53742	5.82664	5.85999	5.8445	6.19814	6.22567	6.20413	0.501058	5.88961	14.9529	0.000110228	0.00128622
ENSG00000128829	EIF2AK4	5.71978	5.83846	5.83014	6.11493	6.20409	6.03276	6.54724	6.49133	6.4792	0.528558	6.16992	14.9154	0.000112442	0.00130988
ENSG00000167601	AXL	7.18423	7.22184	7.21801	7.83294	7.85718	7.79711	7.47334	7.48613	7.53372	0.46514	7.53416	14.9139	0.00011253	0.00131033
ENSG00000011260	UTP18	6.28148	6.30344	6.34945	6.59356	6.62432	6.58459	6.88914	6.88244	6.91666	0.444402	6.62258	14.9031	0.000113178	0.00131729
ENSG00000154640	BTG3	4.33147	4.14655	4.41287	4.58096	4.61836	4.75667	4.92802	4.92696	4.87801	0.487911	4.64339	14.8908	0.000113915	0.00132442
ENSG00000116560	SFPQ	8.76769	8.76684	8.77662	9.01113	9.06723	9.04622	9.23538	9.24335	9.25461	0.376265	9.03179	14.8845	0.000114297	0.00132797
ENSG00000154582	ELOC	6.08779	6.06669	6.06553	6.53596	6.52016	6.5445	6.35735	6.31788	6.41051	0.37742	6.33546	14.8837	0.000114348	0.00132799
ENSG00000169032	MAP2K1	5.35788	5.41753	5.4824	5.7491	5.72983	5.70379	5.82916	5.90074	5.85773	0.376861	5.68187	14.8734	0.000114972	0.00133406
ENSG00000127334	DYRK2	4.06622	4.06937	4.24674	4.65571	4.66678	4.58794	4.48263	4.4952	4.43711	0.428306	4.4283	14.8713	0.0001151	0.00133496
ENSG00000107669	ATE1	4.33147	4.39781	4.39238	4.68304	4.63982	4.81518	5.04221	4.92325	5.11099	0.505583	4.72975	14.86	0.000115792	0.00134181
ENSG00000157600	TMEM164	6.80896	6.88325	6.8307	7.43987	7.47858	7.40339	7.10793	7.15447	7.12718	0.452716	7.15821	14.8527	0.000116242	0.00134643
ENSG00000120675	DNAJC15	5.35864	5.38189	5.37612	5.66881	5.76498	5.72269	5.69537	5.71589	5.7493	0.347802	5.61303	14.8507	0.000116365	0.00134667
ENSG00000183291	SELENOF	7.38699	7.25158	7.27087	7.56664	7.59042	7.73798	8.10125	8.06021	8.12982	0.579758	7.71545	14.843	0.000116841	0.00135159
ENSG00000144867	SRPRB	7.05624	7.07485	7.04343	7.72136	7.78424	7.75197	7.3409	7.39318	7.34003	0.510906	7.41798	14.8302	0.000117637	0.00135902
ENSG00000155975	VPS37A	4.15546	4.12183	4.0719	4.45977	4.50078	4.47021	4.53818	4.51874	4.47837	0.378579	4.37937	14.789	0.000120234	0.00138599
ENSG00000078269	SYNJ2	4.88647	4.81967	4.8856	5.1491	5.17296	5.22035	5.36615	5.24924	5.37409	0.393913	5.13821	14.7769	0.000121007	0.00139308
ENSG00000134597	RBMX2	4.88221	4.91578	4.92179	5.24172	5.24941	5.16538	5.39867	5.30943	5.36708	0.384243	5.17372	14.7607	0.000122053	0.0014039
ENSG00000132294	EFR3A	5.42094	5.42428	5.49481	5.66935	5.80933	5.8504	6.23982	6.25436	6.1883	0.573721	5.85341	14.74	0.000123401	0.00141847
ENSG00000135547	HEY2	2.78934	2.70478	2.70494	3.34284	3.24638	3.06772	3.2834	3.11295	3.16452	0.475367	3.06534	14.7396	0.000123427	0.00141847
ENSG00000125148	MT2A	6.06541	6.10166	6.02476	6.5621	6.57659	6.63846	6.34554	6.33333	6.37511	0.413152	6.35225	14.7372	0.00012358	0.00141962
ENSG00000186073	CDIN1	1.1383	1.00508	0.995507	1.77237	1.68322	1.4903	1.61882	1.52231	1.73767	0.602099	1.46886	14.7161	0.000124978	0.00143504
ENSG00000113811	SELENOK	4.38818	4.37985	4.22373	4.90355	4.98358	5.01145	4.69303	4.67023	4.6208	0.490975	4.67704	14.6834	0.000127163	0.00145819
ENSG00000133997	MED6	4.13769	4.00595	4.20875	4.46356	4.6075	4.43399	4.62869	4.59064	4.47837	0.417115	4.41011	14.6821	0.000127246	0.00145819
ENSG00000164219	PGGT1B	3.12134	3.24608	3.07546	3.4813	3.71929	3.84319	3.69302	3.69015	3.43987	0.50407	3.50302	14.6636	0.000128501	0.00147167
ENSG00000165660	ABRAXAS2	4.21598	4.29691	4.35203	4.60517	4.62674	4.65804	5.01915	4.97253	5.13287	0.562323	4.68695	14.6472	0.000129628	0.001482
ENSG00000197535	MYO5A	4.47424	4.44772	4.48927	4.77431	4.76446	4.79594	5.05133	5.07301	5.03449	0.452094	4.78668	14.6252	0.000131148	0.0014968
ENSG00000188786	MTF1	4.52159	4.65026	4.53804	4.86779	4.90304	4.8973	5.15226	5.17399	5.26513	0.48092	4.90862	14.6159	0.000131796	0.00150354
ENSG00000145388	METTL14	2.40569	2.51028	2.51225	2.722	2.92758	3.06434	3.07026	3.07334	3.04217	0.513977	2.83734	14.6137	0.000131955	0.00150471
ENSG00000162614	NEXN	1.93187	1.97541	1.93254	2.57101	2.52289	2.71345	2.62865	2.39887	2.20699	0.576018	2.35145	14.5793	0.000134381	0.00153039
ENSG00000185787	MORF4L1	7.4396	7.40951	7.38507	7.67434	7.60049	7.83878	7.93014	7.89408	7.94127	0.407413	7.6955	14.5686	0.000135146	0.00153845
ENSG00000106052	TAX1BP1	5.3087	5.36584	5.34372	5.60736	5.73759	5.60368	5.857	5.77315	5.74458	0.383929	5.60643	14.5427	0.000137015	0.00155771
ENSG00000148459	PDSS1	4.19895	4.34611	4.26938	4.53969	4.73152	4.56658	4.75909	4.76236	4.76116	0.417302	4.5637	14.538	0.000137362	0.00156098
ENSG00000188763	FZD9	0.801666	0.609481	0.362712	1.64473	1.27135	1.13811	1.22648	1.36717	1.20427	0.733361	1.11887	14.5322	0.000137788	0.00156448
ENSG00000104067	TJP1	0.386064	0.33912	0.478304	0.765485	1.3312	0.989133	1.54843	1.21775	1.21992	0.814628	0.978639	14.5291	0.000138012	0.00156635
ENSG00000177425	PAWR	5.21097	5.12011	5.23861	5.4527	5.56074	5.63593	5.58541	5.54906	5.54074	0.364815	5.44362	14.526	0.000138242	0.00156828
ENSG00000132879	FBXO44	0.0933756	-0.083	-0.591371	0.829504	0.476465	0.501526	0.828472	0.846958	0.458397	0.864761	0.443051	14.5239	0.000138393	0.00156933
ENSG00000071537	SEL1L	4.95707	4.92819	4.88141	5.17859	5.27096	5.32508	5.70984	5.78495	5.752	0.602894	5.35063	14.5216	0.000138561	0.00157055
ENSG00000167311	ART5	-2.53559	-2.81744	-3.56511	-1.36334	-1.80092	-1.85127	-1.41162	-1.49834	-0.690107	1.85989	-1.7528	14.5201	0.000138671	0.00157065
ENSG00000139112	GABARAPL1	6.7584	6.69697	6.70343	7.0044	6.9984	7.05335	7.07813	7.10295	7.06705	0.33146	6.94899	14.5111	0.000139338	0.00157583
ENSG00000168389	MFSD2A	2.18122	2.38294	2.32729	3.18661	3.14329	2.99143	2.71382	2.77722	2.64414	0.630099	2.74606	14.5118	0.000139286	0.00157583
ENSG00000132792	CTNNBL1	5.89236	5.88523	5.94562	6.39531	6.47544	6.39536	6.19773	6.19216	6.18731	0.404443	6.18957	14.5031	0.000139931	0.00158134
ENSG00000162851	TFB2M	5.15023	5.14567	5.0618	5.36564	5.58061	5.40412	5.59915	5.51373	5.57234	0.389051	5.39032	14.4871	0.00014112	0.00159341
ENSG00000142867	BCL10	4.0454	4.00054	4.17659	4.48608	4.41071	4.35177	4.74567	4.80127	4.83672	0.542999	4.45909	14.4666	0.000142664	0.0016081
ENSG00000102531	FNDC3A	3.58709	3.63878	3.40549	3.92216	4.03221	3.80925	4.27254	4.31307	4.41006	0.596541	3.97	14.4621	0.000143007	0.00161128
ENSG00000153827	TRIP12	6.28512	6.33209	6.30864	6.59672	6.6653	6.56558	7.00397	7.04142	6.98668	0.515593	6.67195	14.4541	0.000143616	0.00161745
ENSG00000028203	VEZT	4.40907	4.49725	4.36711	4.72782	4.86102	4.68911	5.19403	5.12721	5.04111	0.527895	4.79753	14.4468	0.000144175	0.00162237
ENSG00000174099	MSRB3	6.09931	6.11925	6.1741	6.4744	6.41966	6.35407	6.61277	6.60536	6.59778	0.383026	6.39745	14.4071	0.000147249	0.00165414
ENSG00000189159	JPT1	5.09605	4.99504	5.01375	5.94832	5.80088	5.84844	5.40651	5.33547	5.37059	0.605616	5.46572	14.406	0.000147335	0.0016544
ENSG00000142227	EMP3	7.30059	7.2567	7.23208	7.97073	7.90227	8.01257	7.55383	7.55874	7.56642	0.511911	7.62391	14.4049	0.000147418	0.00165464
ENSG00000013503	POLR3B	4.45571	4.42904	4.62715	4.84183	4.88817	4.8262	5.38141	5.33826	5.30145	0.611065	4.94069	14.4011	0.000147717	0.00165729
ENSG00000306611	ENSG00000306611	-0.0297271	-0.427528	-0.687784	1.51447	1.5485	1.60646	1.00406	0.324286	-0.0413119	1.52883	0.784409	14.3991	0.000147873	0.00165833
ENSG00000176407	KCMF1	-1.0653	-0.0526732	-0.84568	0.476548	0.0896588	0.822981	0.685851	0.231371	0.404613	1.09914	0.202185	14.3764	0.000149663	0.00167569
ENSG00000115414	FN1	0.783497	0.361814	0.882535	1.72266	1.62702	1.27313	4.26629	4.2974	4.24581	2.81145	2.98701	14.3473	0.000151999	0.00169885
ENSG00000160588	MPZL3	2.31373	2.34926	2.32729	2.81981	2.83964	2.61518	2.8286	2.95846	2.83413	0.492254	2.67417	14.3321	0.000153229	0.00171187
ENSG00000103274	NUBP1	4.51059	4.64102	4.61331	5.35549	5.39464	5.36892	4.93099	4.94719	4.87183	0.574678	4.9962	14.3203	0.000154197	0.0017205
ENSG00000113070	HBEGF	1.68997	1.64624	1.93254	3.00447	2.78932	2.71345	2.22654	2.29938	2.19119	0.818671	2.35059	14.307	0.000155283	0.00173116
ENSG00000125482	TTF1	3.88637	3.85216	3.92479	4.16482	4.32498	4.21206	4.75015	4.64794	4.64274	0.588261	4.3047	14.2756	0.000157897	0.0017566
ENSG00000100077	GRK3	1.31313	1.57033	1.72351	2.27018	2.35427	2.24283	2.15389	1.80622	2.23807	0.648266	2.00371	14.2638	0.000158893	0.00176693
ENSG00000105810	CDK6	5.23206	5.10085	5.01088	5.41668	5.41346	5.49359	5.5067	5.63262	5.64154	0.403132	5.3981	14.2494	0.000160113	0.00177826
ENSG00000145335	SNCA	1.96449	2.00455	1.99599	2.39178	2.64112	2.39057	2.43042	2.53145	2.51684	0.501584	2.33882	14.2485	0.000160187	0.00177833
ENSG00000138642	HERC6	-2.95634	-3.61362	-4.58787	-2.35219	-2.43645	-2.07165	0.00391521	0.390244	-0.375854	3.68481	-1.19308	14.247	0.000160319	0.00177906
ENSG00000165280	VCP	9.66657	9.66266	9.6698	10.4396	10.4174	10.4251	9.94321	9.97331	9.97099	0.54732	10.0532	14.2326	0.000161547	0.00179042
ENSG00000168827	GFM1	4.76441	4.7823	4.73684	5.04087	5.09568	5.12049	5.36907	5.55506	5.55547	0.544446	5.14569	14.2013	0.000164256	0.0018174
ENSG00000172159	FRMD3	-0.522805	-0.592241	-0.961443	0.284349	-0.0560938	0.0603698	0.811397	0.132058	0.458397	1.03468	0.0482894	14.1865	0.000165553	0.00183022
ENSG00000197885	NKIRAS1	3.49798	3.76971	3.42579	3.92949	3.94678	3.98766	4.12486	4.32717	4.31851	0.543599	3.95585	14.1734	0.000166708	0.00184068
ENSG00000096063	SRPK1	5.619	5.53013	5.59426	5.89462	5.905	5.89153	6.39617	6.41251	6.32397	0.576186	5.98979	14.1468	0.000169082	0.00186456
ENSG00000182541	LIMK2	5.02147	5.15788	5.17664	5.69267	5.69949	5.72269	5.37271	5.48761	5.40438	0.450944	5.43567	14.1429	0.000169437	0.00186769
ENSG00000131355	ADGRE3	-0.665263	-0.778213	-0.687784	0.0356637	-0.184323	0.190153	1.26462	1.18096	1.08965	1.4823	0.370641	14.1224	0.000171292	0.00188656
ENSG00000103966	EHD4	5.63366	5.76747	5.70579	6.40486	6.29031	6.3363	5.97719	5.98052	6.04405	0.480026	6.04019	14.1124	0.000172207	0.00189585
ENSG00000163684	RPP14	3.06228	2.78253	3.04579	3.38073	3.39401	3.32109	3.57657	3.70102	3.46637	0.512942	3.32839	14.1105	0.000172379	0.00189696
ENSG00000110400	NECTIN1	4.35011	4.22446	4.38351	5.26505	5.28314	5.1519	4.63477	4.65578	4.74095	0.663309	4.79437	14.1004	0.000173309	0.00190491
ENSG00000279086	ENSG00000279086	-4.58787	-4.58787	-4.58787	-1.87312	-3.01875	-2.33187	-2.58253	-3.06278	-4.58787	5.48346	-3.06319	14.0849	0.000174739	0.00191814
ENSG00000100564	PIGH	3.47269	3.55017	3.53663	4.00247	4.03221	3.90121	3.95839	3.78923	3.92133	0.417103	3.81053	14.0751	0.000175651	0.00192735
ENSG00000153046	CDYL	6.35407	6.39292	6.3384	6.63669	6.62192	6.64555	6.92133	6.90236	6.90944	0.417579	6.65328	14.0561	0.000177437	0.00194452
ENSG00000125630	POLR1B	6.99168	7.03988	6.92464	7.23647	7.30865	7.23445	7.54676	7.51337	7.53782	0.416762	7.2769	14.0186	0.000181016	0.00198046
ENSG00000112208	BAG2	4.87686	4.81967	4.93095	5.14361	5.10343	5.32296	5.53429	5.51003	5.55624	0.497225	5.22593	14.0164	0.000181224	0.00198192
ENSG00000117222	RBBP5	6.07104	6.02509	5.99401	6.28297	6.35589	6.33139	6.38863	6.4384	6.42746	0.341519	6.26672	14.0141	0.000181445	0.0019831
ENSG00000101856	PGRMC1	6.03309	6.09659	6.05533	6.33007	6.39218	6.38862	6.84761	6.88077	6.85596	0.57506	6.46936	13.9855	0.000184229	0.00200731
ENSG00000025800	KPNA6	5.75517	5.75627	5.79768	6.15139	6.28955	6.19887	6.06985	6.05061	6.05063	0.36839	6.02536	13.9688	0.000185875	0.00202358
ENSG00000134363	FST	-1.27778	-0.351726	-0.259575	0.329327	-0.151181	0.757481	1.81148	2.07043	1.84252	1.95894	0.927371	13.9531	0.000187424	0.00203709
ENSG00000111666	CHPT1	5.71739	5.63865	5.68729	6.10486	6.01493	6.17516	5.95063	6.01969	5.97654	0.361345	5.93186	13.9423	0.000188508	0.00204719
ENSG00000072401	UBE2D1	2.52531	2.50009	2.30867	2.74708	2.80629	3.01615	3.16068	3.23464	3.05968	0.56972	2.84932	13.922	0.000190557	0.00206859
ENSG00000114030	KPNA1	5.17571	5.27011	5.32222	5.6512	5.66909	5.55451	5.67368	5.57765	5.55315	0.357249	5.50477	13.9208	0.000190676	0.00206903
ENSG00000198832	SELENOM	5.32292	5.28651	5.33224	5.82615	5.70233	5.72697	5.55815	5.60626	5.67883	0.372094	5.57215	13.9173	0.000191032	0.00207204
ENSG00000136146	MED4	3.40299	3.54274	3.48227	3.70897	3.89219	3.905	4.03394	3.93631	4.09055	0.455922	3.79608	13.916	0.000191165	0.00207264
ENSG00000260269	ENSG00000260269	2.69043	2.81579	2.74704	3.08208	3.17304	3.22138	3.2988	3.34409	3.11933	0.459821	3.07281	13.9082	0.000191954	0.00207949
ENSG00000251381	LINC00958	5.59185	5.51629	5.52806	5.79542	5.87766	5.81361	6.03763	6.0136	6.00053	0.380772	5.8103	13.9073	0.000192049	0.00207967
ENSG00000143498	TAF1A	2.65589	2.59892	2.70494	3.16816	3.02866	2.99499	3.16741	3.06663	3.15641	0.44703	2.96506	13.9012	0.000192675	0.00208559
ENSG00000303665	ENSG00000303665	-4.58787	-4.58787	-4.58787	-3.07442	-4.58787	-2.64959	-1.41162	-2.20227	-2.57963	5.76073	-2.90014	13.897	0.000193106	0.00208855
ENSG00000141380	SS18	5.78001	5.76428	5.84206	6.04839	6.05897	6.12451	6.22176	6.24622	6.26812	0.368281	6.0514	13.889	0.00019393	0.0020966
ENSG00000004534	RBM6	5.77139	5.79378	5.83014	6.20555	6.21525	6.08417	6.21366	6.06709	6.09057	0.349175	6.04038	13.8846	0.000194382	0.00210063
ENSG00000143515	ATP8B2	3.95697	4.00955	4.00601	5.12778	5.10429	5.01933	4.32612	4.41032	4.38077	0.782893	4.55611	13.8778	0.000195088	0.00210653
ENSG00000128245	YWHAH	6.8428	6.81216	6.75936	7.16964	7.17722	7.26387	7.05678	7.12168	7.08586	0.342433	7.04215	13.8727	0.000195617	0.00211021
ENSG00000133627	ACTR3B	4.6932	4.76751	4.71462	5.2527	5.29971	5.26596	5.03671	4.93987	5.09516	0.429592	5.02519	13.8722	0.000195668	0.00211021
ENSG00000124784	RIOK1	5.25861	5.2421	5.21881	5.5592	5.52082	5.48792	5.7423	5.76541	5.72414	0.397985	5.51688	13.8681	0.000196102	0.00211403
ENSG00000119523	ALG2	5.50373	5.39982	5.43024	5.73403	5.70346	5.74978	5.95014	5.90262	5.91355	0.383898	5.71201	13.8521	0.000197773	0.00212944
ENSG00000158710	TAGLN2	10.0611	10.0616	10.0512	11.0002	11.0019	11.0206	10.3566	10.3913	10.4086	0.671902	10.5387	13.8512	0.000197869	0.00212961
ENSG00000082397	EPB41L3	-4.58787	-4.58787	-4.58787	-3.07442	-3.59974	-3.05764	-3.58431	-3.06278	-2.04273	5.06516	-3.36273	13.8331	0.000199782	0.00214406
ENSG00000112972	HMGCS1	4.56877	4.59865	4.46425	4.91743	4.92166	4.76294	5.32086	5.14563	5.21132	0.514896	4.90747	13.836	0.000199473	0.00214406
ENSG00000130204	TOMM40	7.66892	7.73711	7.71468	8.74158	8.62842	8.66665	8.02299	8.07198	8.03814	0.689705	8.20142	13.8324	0.00019986	0.00214406
ENSG00000198860	TSEN15	4.62724	4.40192	4.32294	4.81441	4.78172	4.77126	4.98909	5.034	4.96883	0.441264	4.76465	13.837	0.000199377	0.00214406
ENSG00000074416	MGLL	6.79031	6.80881	6.78147	7.361	7.33776	7.34867	7.05088	7.09473	7.03616	0.418829	7.08572	13.8266	0.000200476	0.00214979
ENSG00000149218	ENDOD1	4.86503	4.85109	4.82465	5.1577	5.2679	5.12131	5.69827	5.77624	5.75401	0.643838	5.30592	13.8009	0.000203236	0.00217586
ENSG00000170946	DNAJC24	3.12855	3.10188	2.98454	3.43318	3.52537	3.50695	3.67425	3.57905	3.37493	0.448147	3.38529	13.7993	0.000203415	0.0021769
ENSG00000085377	PREP	6.56754	6.61669	6.5772	7.02868	6.98146	6.99726	6.86659	6.82298	6.89335	0.346517	6.82721	13.7889	0.000204544	0.00218301
ENSG00000263731	ENSG00000263731	-1.43909	-0.991756	-1.37772	-0.442654	-0.752067	0.00500069	-0.295713	0.0253995	-0.157866	1.07778	-0.508092	13.7887	0.000204564	0.00218301
ENSG00000141076	UTP4	5.87905	5.80418	5.81097	6.23392	6.19727	6.15742	6.15945	6.10318	6.13975	0.334254	6.06282	13.7337	0.000210643	0.00223892
ENSG00000196449	YRDC	5.56285	5.49399	5.59554	6.49275	6.50205	6.49229	5.89295	5.86107	5.90328	0.671962	6.03187	13.7336	0.00021065	0.00223892
ENSG00000287378	ENSG00000287378	-2.95634	-3.61362	-4.58787	-2.09286	-1.6087	-2.33187	-1.77441	-2.48804	-2.04273	2.20214	-2.38284	13.7357	0.000210413	0.00223892
ENSG00000087586	AURKA	7.67925	7.67645	7.71998	7.95882	8.06481	7.96394	8.04187	8.00777	8.00548	0.315638	7.9099	13.7259	0.000211517	0.00224722
ENSG00000080608	PUM3	4.85419	4.87593	4.90226	5.13967	5.24163	5.1638	5.26002	5.29084	5.32336	0.360582	5.12756	13.6766	0.000217141	0.00230236
ENSG00000067182	TNFRSF1A	8.37358	8.38712	8.38165	8.84786	8.79277	8.81614	8.62741	8.63099	8.65559	0.350676	8.62375	13.6457	0.000220744	0.00233588
ENSG00000171100	MTM1	2.78478	2.82807	2.58627	3.02513	3.24638	3.07782	3.36759	3.41973	3.3992	0.528787	3.1086	13.6415	0.000221243	0.00233928
ENSG00000143162	CREG1	5.40469	5.34321	5.39242	5.63897	5.6551	5.76913	6.10487	6.20482	6.14795	0.559546	5.77607	13.634	0.000222126	0.0023458
ENSG00000293688	ENSG00000293688	-4.58787	-3.61362	-3.23867	-1.68247	-3.01875	-1.49139	-2.41241	-1.14695	-1.90053	2.70115	-2.20809	13.6345	0.000222065	0.0023458
ENSG00000104064	GABPB1	4.1938	4.24597	4.47403	4.69275	4.57569	4.7109	4.85178	4.77271	4.74907	0.418797	4.60155	13.6258	0.000223092	0.00235413
ENSG00000163075	CFAP221	-4.58787	-3.61362	-4.58787	-3.07442	-3.01875	-2.33187	-2.58253	-1.66698	-1.7711	3.29631	-2.71261	13.6118	0.000224767	0.00237085
ENSG00000114529	C3orf52	1.98053	2.66428	2.57593	3.33459	3.09922	3.01615	2.87864	3.00481	3.06402	0.638704	2.8911	13.5877	0.000227671	0.00239957
ENSG00000134153	EMC7	6.86268	6.81884	6.7764	7.27291	7.29011	7.33137	7.11143	7.08854	7.05292	0.37585	7.08073	13.5737	0.000229371	0.0024146
ENSG00000180773	SLC36A4	3.89697	4.01672	3.8708	4.4686	4.41901	4.68801	4.23622	4.30454	4.26857	0.477624	4.26418	13.5618	0.000230832	0.00242533
ENSG00000118454	ANKRD13C	5.04072	5.03795	5.0233	5.24024	5.3301	5.42207	5.72416	5.65291	5.70619	0.491258	5.37908	13.5522	0.000232015	0.00243468
ENSG00000164209	SLC25A46	4.51747	4.23064	4.36711	4.68087	4.74148	5.02804	4.72073	4.82928	4.88539	0.443576	4.68612	13.539	0.000233659	0.00245097
ENSG00000138802	SEC24B	4.59375	4.61646	4.73219	4.991	5.03038	4.92273	5.58791	5.48509	5.51638	0.633936	5.10008	13.5346	0.000234208	0.00245478
ENSG00000276043	UHRF1	6.84307	6.78251	6.75449	7.49009	7.46127	7.54311	7.06715	7.06979	7.0965	0.509896	7.15281	13.529	0.000234907	0.00246015
ENSG00000163754	GYG1	5.92433	5.86004	5.87723	6.16696	6.25249	6.22258	6.15395	6.24993	6.24965	0.329228	6.11493	13.5145	0.000236725	0.00247722
ENSG00000163491	NEK10	1.23506	1.89989	1.74214	2.13737	2.31923	2.2488	2.42482	2.21089	2.25337	0.620044	2.09129	13.5122	0.00023702	0.00247835
ENSG00000164318	EGFLAM	2.7098	2.51535	2.61687	3.01827	3.02866	3.03008	3.63354	3.24656	3.55544	0.661499	3.08622	13.4946	0.000239252	0.00249757
ENSG00000107897	ACBD5	4.19551	4.32027	4.27099	4.64129	4.62195	4.54612	5.19485	5.20334	5.07701	0.645811	4.72337	13.4923	0.000239545	0.00249784
ENSG00000217442	SYCE3	-1.52705	-1.82494	-2.97263	-0.881116	-0.802634	-0.758199	-0.880858	-1.21072	-0.524441	1.28942	-1.12672	13.493	0.000239457	0.00249784
ENSG00000167333	TRIM68	3.57922	3.65495	3.5967	4.12711	4.04657	4.09927	3.93887	3.93631	3.93325	0.406639	3.89323	13.4855	0.000240411	0.00250588
ENSG00000188938	FAM120AOS	5.54544	5.52008	5.49824	5.81334	5.80141	5.77431	5.94721	6.02099	5.99656	0.374449	5.78136	13.468	0.000242662	0.00252835
ENSG00000265491	RNF115	5.95863	6.03615	5.97937	6.55295	6.63088	6.62733	6.29768	6.27488	6.23239	0.454709	6.31004	13.4654	0.00024301	0.00252999
ENSG00000159267	HLCS	4.88221	4.89648	4.9177	5.19767	5.24319	5.14791	5.60536	5.56104	5.4332	0.477308	5.23361	13.4623	0.000243408	0.00253114
ENSG00000106028	SSBP1	5.68778	5.77171	5.7444	6.03445	6.08049	6.04009	6.0631	6.0633	6.07343	0.324305	5.95907	13.456	0.000244225	0.00253764
ENSG00000162378	ZYG11B	4.42527	4.34468	4.13315	4.62897	4.60992	4.69678	5.10223	5.17477	5.06298	0.593296	4.72686	13.4528	0.000244635	0.0025399
ENSG00000109606	DHX15	7.55086	7.60201	7.59828	7.83708	7.90301	7.82248	8.25283	8.19434	8.19179	0.46118	7.90708	13.4418	0.000246085	0.00255195
ENSG00000113583	C5orf15	5.07846	5.05371	5.04783	5.30782	5.2679	5.53937	5.76298	5.70891	5.8197	0.523833	5.42919	13.4419	0.000246069	0.00255195
ENSG00000088726	TMEM40	-0.823344	-0.828709	-1.08731	0.554385	0.247104	1.05876	0.548329	-0.585676	-0.0791264	1.35685	0.0717391	13.4273	0.00024799	0.00256868
ENSG00000101266	CSNK2A1	6.74526	6.70725	6.66613	7.00093	6.98868	6.93959	7.16995	7.14913	7.07944	0.35064	6.94947	13.4118	0.000250044	0.00258793
ENSG00000077782	FGFR1	4.31733	4.46355	4.45157	5.215	5.12134	5.15269	4.66598	4.7404	4.77447	0.550756	4.80122	13.4073	0.000250648	0.00259216
ENSG00000107651	SEC23IP	5.73049	5.74174	5.75533	6.03403	6.08875	6.02146	6.59729	6.56457	6.58159	0.596909	6.16632	13.4058	0.000250849	0.00259221
ENSG00000172939	OXSR1	5.76967	5.81707	5.8225	6.04123	6.13482	6.06822	6.3422	6.42371	6.45045	0.449953	6.11815	13.4059	0.00025084	0.00259221
ENSG00000162384	CZIB	4.59635	4.55992	4.63838	5.04256	5.05188	5.16063	4.9428	4.82134	4.93603	0.398751	4.87576	13.4045	0.000251028	0.00259304
ENSG00000076043	REXO2	5.42388	5.53263	5.43383	5.82075	6.02855	5.94262	5.7757	5.75501	5.7493	0.385247	5.732	13.3945	0.000252364	0.00260582
ENSG00000171314	PGAM1	8.14231	8.17275	8.0937	8.43993	8.63771	8.55979	8.46091	8.41429	8.37905	0.34818	8.37777	13.3861	0.000253501	0.00261552
ENSG00000092929	UNC13D	5.19043	5.23289	5.24597	5.57096	5.46714	5.59081	6.0996	6.11867	6.10276	0.629859	5.67175	13.3785	0.00025453	0.00262409
ENSG00000070778	PTPN21	2.45243	2.70478	2.61687	3.17434	3.30726	3.21529	2.93096	2.96569	3.00651	0.514481	2.95606	13.3647	0.000256401	0.00264132
ENSG00000303789	ENSG00000303789	-4.58787	-4.58787	-4.58787	-3.07442	-3.01875	-3.62872	-3.58431	-3.06278	-3.44437	4.63257	-3.58907	13.3615	0.00025684	0.00264481
ENSG00000120616	EPC1	3.09947	3.27924	3.17134	3.54942	3.49167	3.55352	4.02471	3.97623	3.93087	0.587947	3.60135	13.3545	0.000257805	0.00265372
ENSG00000100916	BRMS1L	2.55239	2.38294	2.41114	2.79597	2.80206	2.98429	2.91506	3.11944	2.96065	0.486523	2.79018	13.3271	0.000261601	0.00268965
ENSG00000070770	CSNK2A2	5.36018	5.28651	5.23039	5.7135	5.74642	5.61123	5.61154	5.60684	5.57614	0.352779	5.53754	13.3147	0.000263334	0.00270327
ENSG00000234797	RPS3AP6	8.94852	8.97361	8.94502	9.32595	9.36879	9.30893	9.22434	9.19903	9.2214	0.320376	9.17704	13.2979	0.000265701	0.00272544
ENSG00000133818	RRAS2	5.48488	5.48368	5.37984	5.67208	5.83901	5.87763	5.76076	5.83909	5.81327	0.351772	5.69393	13.2935	0.000266321	0.00273074
ENSG00000158201	ABHD3	4.55008	4.5587	4.54469	4.93117	4.88318	4.94681	4.88786	4.90738	4.82653	0.347278	4.79125	13.2596	0.000271181	0.00277735
ENSG00000149260	CAPN5	-1.35618	-1.31263	-1.22522	-0.231957	-0.703213	-0.758199	0.00391521	0.278576	0.134184	1.2143	-0.452445	13.247	0.000273023	0.00279297
ENSG00000198856	OSTC	5.79879	5.75948	5.69089	6.00443	6.04339	6.08875	6.14631	6.0763	6.21394	0.346767	5.99053	13.2382	0.000274299	0.00280168
ENSG00000136100	VPS36	2.9073	3.00788	3.10454	3.70257	3.5633	3.18447	3.67897	3.42761	3.5616	0.522926	3.37623	13.216	0.000277564	0.00283285
ENSG00000285741	ENSG00000285741	-4.58787	-4.58787	-4.58787	-3.07442	-3.01875	-3.62872	-2.99816	-3.63254	-3.44437	4.63425	-3.58852	13.2007	0.000279843	0.0028528
ENSG00000188529	SRSF10	6.61068	6.5875	6.48967	6.78886	6.88815	6.93959	6.87149	6.9693	6.90974	0.332181	6.79322	13.1659	0.000285082	0.00290509
ENSG00000123684	LPGAT1	6.07431	6.04363	6.0939	6.26355	6.45473	6.34886	6.75965	6.79586	6.71669	0.501003	6.42314	13.1633	0.000285483	0.00290806
ENSG00000106868	SUSD1	1.31313	1.37221	1.1707	1.59034	1.80643	1.94481	2.42482	2.64387	2.62663	0.951878	1.97687	13.1599	0.000286007	0.00291227
ENSG00000183696	UPP1	5.72574	5.64097	5.75017	6.16774	6.11026	6.20272	5.90809	6.0348	6.0191	0.371213	5.96387	13.1552	0.000286721	0.00291842
ENSG00000119004	CYP20A1	2.27524	2.6226	2.58627	2.87014	3.03227	2.85717	3.50669	3.4171	3.21617	0.671965	2.98143	13.1498	0.00028755	0.00292461
ENSG00000151465	CDC123	5.9495	5.95871	5.94612	6.19306	6.28275	6.23391	6.31785	6.35483	6.28961	0.328322	6.17832	13.145	0.000288292	0.00292775
ENSG00000162769	FLVCR1	5.04167	5.10506	4.85812	5.36362	5.43408	5.3873	5.37779	5.31439	5.32607	0.362702	5.25683	13.1449	0.000288302	0.00292775
ENSG00000137947	GTF2B	5.02244	5.03795	5.05157	5.39106	5.2633	5.35168	5.57026	5.44557	5.41206	0.371651	5.29522	13.1389	0.000289232	0.00293494
ENSG00000107164	FUBP3	6.24626	6.22901	6.24151	6.50444	6.45204	6.53964	6.74539	6.74399	6.75883	0.390821	6.51081	13.1285	0.000290843	0.00295016
ENSG00000100139	MICALL1	5.81844	5.81707	5.87986	6.31931	6.26559	6.27874	6.07879	6.08753	6.15713	0.362519	6.09006	13.1266	0.000291129	0.00295192
ENSG00000188229	TUBB4B	10.1889	10.1631	10.1755	11.0177	10.9785	11.0206	10.4314	10.4579	10.5086	0.58524	10.5911	13.1247	0.00029143	0.00295385
ENSG00000155660	PDIA4	8.54919	8.55861	8.56819	8.94431	8.97161	8.91713	8.78721	8.85816	8.80457	0.323519	8.78218	13.1238	0.000291566	0.00295409
ENSG00000300540	ENSG00000300540	-4.58787	-4.58787	-4.58787	-3.64117	-3.01875	-3.62872	-3.58431	-1.66698	-1.7711	5.56018	-3.05467	13.1178	0.000292511	0.00296253
ENSG00000158623	COPG2	5.4457	5.4005	5.3551	5.71084	5.73649	5.71893	5.79374	5.72923	5.69012	0.329679	5.62863	13.1146	0.000293007	0.00296528
ENSG00000163577	EIF5A2	2.22226	2.11554	1.88305	2.49409	2.331	2.75599	2.75905	2.7313	2.89391	0.595661	2.50049	13.0908	0.000296749	0.00300085
ENSG00000115170	ACVR1	3.41189	3.34336	3.32439	3.8116	3.63155	3.66041	3.82862	3.86464	3.84514	0.417357	3.65067	13.0735	0.000299498	0.00302403
ENSG00000120533	ENY2	5.30552	5.4263	5.34295	5.86342	5.90105	5.90104	5.7253	5.58764	5.60027	0.410568	5.64516	13.0659	0.000300727	0.00303412
ENSG00000172086	KRCC1	1.74734	2.30311	1.99599	2.85868	2.70133	2.92213	2.47448	2.58876	2.41171	0.643297	2.49024	13.0664	0.000300635	0.00303412
ENSG00000065600	PACC1	4.47989	4.43707	4.47124	4.86969	5.0195	4.84209	4.68953	4.77579	4.89639	0.390161	4.7339	13.0485	0.000303522	0.00305882
ENSG00000123609	NMI	3.32034	3.42645	3.15753	3.77954	3.72822	3.62871	4.53037	4.58361	4.50896	0.882452	3.94718	13.0486	0.000303513	0.00305882
ENSG00000169756	LIMS1	4.8234	4.76751	4.69921	5.0058	4.95628	5.30373	5.45885	5.46992	5.56546	0.547952	5.15121	13.0382	0.000305195	0.0030745
ENSG00000115145	STAM2	1.98848	2.06111	1.90801	2.43358	2.29539	2.39596	2.58411	2.60273	2.68982	0.521685	2.35287	13.0358	0.00030559	0.00307711
ENSG00000165449	SLC16A9	2.54701	2.44801	2.15732	2.63511	2.89622	2.88428	3.1741	3.06327	3.13593	0.58525	2.8063	13.0304	0.00030647	0.00308266
ENSG00000131931	THAP1	2.2556	1.92296	1.99599	2.44895	2.49699	2.49473	2.81152	2.75653	2.60294	0.548184	2.44915	13.0247	0.000307413	0.00308861
ENSG00000067057	PFKP	8.52154	8.44073	8.4801	8.89957	8.86378	8.88563	8.71652	8.75345	8.73622	0.330053	8.70933	13.0204	0.000308109	0.00309443
ENSG00000082516	GEMIN5	7.01814	7.02973	7.07016	7.30844	7.34013	7.24886	7.64295	7.62815	7.57272	0.426416	7.33725	13.0167	0.000308731	0.0030995
ENSG00000122257	RBBP6	5.0205	4.86605	5.04221	5.70232	5.76986	5.62277	5.25292	5.28435	5.29869	0.526957	5.34962	13.0099	0.000309841	0.00310946
ENSG00000065665	SEC61A2	3.11771	3.27327	3.19181	3.78964	3.78497	3.56314	3.47992	3.60706	3.595	0.447131	3.50764	13.0084	0.0003101	0.00311089
ENSG00000137834	SMAD6	7.66552	7.60483	7.62189	8.09538	7.99852	8.05887	7.88341	7.89313	7.88622	0.341001	7.86694	13.0054	0.000310589	0.00311461
ENSG00000109519	GRPEL1	6.36213	6.38947	6.36718	6.86338	6.85412	6.81509	6.614	6.64163	6.63109	0.367945	6.62824	13.0017	0.000311214	0.0031185
ENSG00000011376	LARS2	6.43959	6.40185	6.43956	6.97617	6.96384	6.8927	6.69944	6.762	6.61194	0.397291	6.70355	13.0007	0.000311378	0.00311897
ENSG00000120211	INSL4	3.78042	3.6411	3.45995	4.2695	4.19892	4.17177	3.93098	3.93998	4.06043	0.469462	3.96138	12.9929	0.000312676	0.0031296
ENSG00000259010	NUP50P1	-1.94493	-1.63324	-1.46047	-0.933287	-0.965927	-0.665444	-0.451874	-0.281867	0.100751	1.28073	-0.791561	12.9824	0.000314439	0.00314487
ENSG00000115808	STRN	4.62852	4.58184	4.59422	4.88578	4.84878	4.94221	5.32538	5.27928	5.2074	0.493338	4.9481	12.9646	0.000317438	0.00317247
ENSG00000300605	ENSG00000300605	-4.58787	-3.03734	-3.56511	-1.68247	-1.6087	-2.33187	-2.26024	-2.65541	-1.5426	2.28981	-2.33068	12.9575	0.00031865	0.00318337
ENSG00000108424	KPNB1	8.87314	8.8726	8.88527	9.1509	9.12417	9.12005	9.51172	9.48002	9.47505	0.444423	9.18793	12.9419	0.0003213	0.00320864
ENSG00000088451	TGDS	2.94048	2.89183	2.98845	3.45871	3.19576	3.30112	3.40791	3.38241	3.47943	0.434869	3.24348	12.9266	0.000323938	0.00323253
ENSG00000185585	OLFML2A	5.66004	5.66569	5.60701	6.10445	6.08005	6.02495	5.89396	5.89223	5.96729	0.352033	5.88827	12.9169	0.000325634	0.00324701
ENSG00000159176	CSRP1	9.57625	9.54802	9.5664	10.4139	10.4152	10.4264	9.84167	9.8637	9.85586	0.60004	9.98994	12.9148	0.000325991	0.00324934
ENSG00000156017	CARNMT1	1.63022	1.29177	1.26387	2.09241	2.24648	1.78142	1.82004	2.17392	1.97758	0.629534	1.84739	12.9131	0.000326285	0.00325031
ENSG00000104756	KCTD9	4.93974	5.11009	5.03656	5.3036	5.2801	5.47333	5.49003	5.38552	5.4499	0.368985	5.28656	12.9037	0.000327936	0.00326503
ENSG00000151093	OXSM	4.29826	4.30571	4.13315	4.62897	4.65278	4.54127	4.71156	4.61498	4.56366	0.372756	4.50635	12.8898	0.000330372	0.00328558
ENSG00000130829	DUSP9	4.12512	4.07109	4.09744	4.4096	4.46114	4.4968	4.40223	4.43006	4.55289	0.362151	4.3489	12.8795	0.000332208	0.00329887
ENSG00000150712	MTMR12	6.17879	6.1292	6.18009	6.43508	6.43543	6.40475	6.77184	6.77852	6.71047	0.436128	6.46764	12.8711	0.000333688	0.00331233
ENSG00000164506	STXBP5	3.08841	3.08833	2.92873	3.41242	3.35129	3.4223	3.44159	3.58141	3.65093	0.444148	3.34704	12.8671	0.000334415	0.00331581
ENSG00000159055	MIS18A	3.53374	3.50755	3.38786	3.72167	3.78068	3.91629	4.20223	4.18575	4.0691	0.514701	3.83949	12.8577	0.000336085	0.00332988
ENSG00000143748	NVL	5.97824	5.89984	5.88459	6.19571	6.25056	6.11555	6.46705	6.44682	6.48407	0.412478	6.20901	12.8569	0.000336231	0.00333007
ENSG00000228612	HK2P1	1.41106	1.38334	1.72351	1.90457	2.06096	2.04429	2.20054	2.0637	2.00495	0.541631	1.89212	12.8555	0.000336494	0.00333143
ENSG00000049249	TNFRSF9	-2.95634	-1.46405	-2.55386	-1.22686	-1.28738	-0.963779	-0.581195	-0.352034	-0.241151	1.62678	-1.06881	12.8342	0.00034035	0.00336834
ENSG00000106355	LSM5	5.58466	5.60338	5.50847	6.1101	6.05276	6.1598	5.86374	5.81228	5.82547	0.41199	5.85312	12.8216	0.000342635	0.00338969
ENSG00000243137	PSG4	0.837331	1.16846	1.15689	1.59034	1.87238	1.55919	3.42485	3.4891	3.58596	1.81759	2.46576	12.7906	0.000348358	0.00344116
ENSG00000172123	SLFN12	-1.0653	-0.351726	-0.638772	0.456414	-0.252981	-0.0235017	0.704469	0.908274	0.584689	1.15229	0.167753	12.7838	0.000349637	0.00345121
ENSG00000126561	STAT5A	6.25618	6.21584	6.26504	6.67177	6.54944	6.53476	6.56422	6.52077	6.54903	0.320229	6.46689	12.7769	0.000350933	0.00346142
ENSG00000147164	SNX12	7.14586	7.15154	7.12396	7.57512	7.55274	7.59032	7.40846	7.37751	7.3826	0.343748	7.37843	12.7684	0.000352518	0.00347446
ENSG00000105835	NAMPT	4.82784	4.93955	4.87931	5.13809	5.10771	5.27623	5.59042	5.60105	5.59577	0.518352	5.24802	12.7624	0.000353656	0.00348309
ENSG00000126787	DLGAP5	4.74576	4.92628	4.88769	5.17089	5.19165	5.08338	5.51398	5.40626	5.35649	0.439815	5.16269	12.759	0.000354299	0.00348682
ENSG00000090060	PAPOLA	6.2059	6.14646	6.20882	6.41826	6.4804	6.48662	6.93371	6.90071	6.86283	0.510032	6.5464	12.7581	0.000354465	0.00348716
ENSG00000173218	VANGL1	6.61326	6.70919	6.69927	6.94106	6.95055	6.90575	7.22499	7.28591	7.2274	0.423493	6.97015	12.7538	0.000355278	0.00348996
ENSG00000249094	ENSG00000249094	-4.58787	-4.58787	-4.58787	-3.64117	-3.01875	-3.62872	-3.58431	-3.06278	-2.81458	4.64163	-3.58705	12.7501	0.00035599	0.00349565
ENSG00000157985	AGAP1	6.03309	6.06237	6.06322	6.34862	6.32089	6.34539	6.40722	6.37397	6.38989	0.311768	6.26803	12.7252	0.000360766	0.0035373
ENSG00000139620	KANSL2	6.5458	6.57329	6.59588	7.20401	7.22711	7.22237	6.84577	6.79687	6.85846	0.46708	6.89921	12.7221	0.000361356	0.00354046
ENSG00000118246	FASTKD2	3.82107	3.73536	3.87714	4.04354	4.16149	4.32092	4.96324	4.81934	4.83291	0.756815	4.35675	12.7191	0.000361945	0.00354492
ENSG00000118200	CAMSAP2	5.60031	5.52386	5.60065	5.92103	5.85592	5.94492	5.90909	5.87409	5.87204	0.321498	5.79723	12.7159	0.000362559	0.00354962
ENSG00000101350	KIF3B	6.08409	6.03615	6.02047	6.31757	6.35337	6.24291	6.58227	6.57466	6.54981	0.39611	6.32283	12.6548	0.000374596	0.00365528
ENSG00000179988	PSTK	1.55724	1.58969	1.33919	2.41283	2.44376	2.37427	2.00414	1.86926	1.8626	0.692752	1.99128	12.6506	0.000375449	0.00366093
ENSG00000168610	STAT3	8.18413	8.18055	8.19718	8.5863	8.56073	8.51853	8.42066	8.44832	8.45687	0.312609	8.40301	12.6241	0.000380811	0.0037009
ENSG00000140848	CPNE2	5.03976	4.97586	4.94005	5.93747	5.95912	5.90294	5.29806	5.32497	5.28108	0.666801	5.46223	12.6181	0.00038203	0.00371139
ENSG00000125812	GZF1	4.06997	3.92254	3.97682	4.35083	4.31908	4.21206	4.5067	4.53097	4.47999	0.414174	4.2793	12.6136	0.000382954	0.00371763
ENSG00000145782	ATG12	3.11044	2.98614	3.09008	3.59617	3.66217	3.67822	3.46362	3.35514	3.34669	0.463135	3.38611	12.6111	0.000383455	0.00371977
ENSG00000066027	PPP2R5A	5.18092	5.02467	5.01183	5.33565	5.38409	5.35791	5.63174	5.77675	5.66532	0.461377	5.39759	12.5775	0.000390415	0.00378035
ENSG00000183684	ALYREF	7.21866	7.25348	7.23373	7.90133	7.89993	7.86986	7.4823	7.48125	7.51342	0.469906	7.56489	12.5559	0.000394961	0.0038137
ENSG00000305520	ENSG00000305520	-4.58787	-4.58787	-4.58787	-4.03822	-3.01875	-3.05764	-2.99816	-3.31971	-3.44437	4.63518	-3.58832	12.5553	0.000395074	0.0038137
ENSG00000126249	PDCD2L	3.4527	3.29112	3.43154	4.36034	4.35845	4.2836	3.75014	3.64358	3.81453	0.675869	3.87581	12.5477	0.000396699	0.00382718
ENSG00000074266	EED	5.08219	5.10925	5.12347	5.42448	5.3109	5.37712	5.63113	5.63432	5.62179	0.401174	5.38434	12.5413	0.000398056	0.00383887
ENSG00000159445	THEM4	5.63492	5.63342	5.53475	5.92149	5.98776	5.76809	6.3825	6.35035	6.40367	0.55575	5.99473	12.539	0.000398546	0.0038422
ENSG00000048140	TSPAN17	6.12254	6.11591	6.15338	6.53596	6.54881	6.56289	6.38935	6.40156	6.36723	0.339599	6.36556	12.5341	0.000399583	0.0038498
ENSG00000065978	YBX1	10.019	10.0473	10.0168	10.3314	10.3168	10.3271	10.3003	10.2943	10.3173	0.286859	10.2252	12.5219	0.000402203	0.003869
ENSG00000162927	PUS10	1.37511	1.46945	1.21137	1.87453	1.99587	2.1309	1.75901	1.98762	1.71575	0.57045	1.75533	12.5203	0.000402552	0.00387094
ENSG00000198912	C1orf174	4.261	4.13012	4.18682	4.71411	4.81669	4.73344	4.46908	4.43397	4.55443	0.434832	4.49684	12.5175	0.000403151	0.00387529
ENSG00000100109	TFIP11	5.94746	6.02731	6.02285	6.69666	6.65626	6.63846	6.24936	6.28539	6.25915	0.478831	6.33566	12.5156	0.000403576	0.00387656
ENSG00000197930	ERO1A	5.14668	5.19942	5.22957	5.43545	5.55008	5.52959	6.14205	6.1368	6.14437	0.666249	5.66829	12.5156	0.00040357	0.00387656
ENSG00000185924	RTN4RL1	2.73838	2.61789	2.97276	3.63923	3.46253	3.47928	3.00417	3.24061	3.24706	0.579844	3.19285	12.5103	0.000404706	0.003886
ENSG00000171863	RPS7	7.97915	7.92943	7.96484	8.35913	8.35687	8.29728	8.24748	8.16961	8.22064	0.318962	8.17819	12.5095	0.00040489	0.00388636
ENSG00000165733	BMS1	6.23419	6.20646	6.26423	6.49737	6.56666	6.49512	7.07991	7.0337	7.06434	0.579825	6.64616	12.5076	0.000405302	0.0038889
ENSG00000143653	SCCPDH	4.73398	4.83496	4.81369	5.2773	5.05721	5.18497	6.10312	6.12837	6.06696	0.916481	5.46455	12.5016	0.000406614	0.00389866
ENSG00000236287	ZBED5	4.45858	4.26415	4.28376	4.68736	4.82296	4.83019	4.61399	4.7277	4.63692	0.385261	4.60536	12.4955	0.000407928	0.00390984
ENSG00000108100	CCNY	5.70598	5.76534	5.75533	6.05049	6.1077	6.07496	6.06084	6.09208	5.97538	0.318717	5.96237	12.4872	0.000409743	0.00392013
ENSG00000083444	PLOD1	8.3013	8.26894	8.26566	8.54943	8.53232	8.53778	8.59853	8.60684	8.63767	0.298929	8.48471	12.4836	0.000410542	0.00392635
ENSG00000240230	COX19	4.77594	4.65487	4.66668	5.33977	5.40234	5.32226	4.96613	4.96533	5.00768	0.480442	5.03702	12.4719	0.000413118	0.00394671
ENSG00000103642	LACTB	0.1512	0.268815	0.237047	0.935126	0.538719	0.838902	0.894822	1.15589	1.325	0.764895	0.757478	12.4678	0.000414032	0.00395401
ENSG00000101608	MYL12A	6.42757	6.43332	6.37017	6.73268	6.72982	6.73228	6.6945	6.69236	6.70248	0.303623	6.6199	12.4618	0.000415349	0.00396372
ENSG00000133985	TTC9	-2.95634	-3.61362	-2.55386	-2.35219	-2.28498	-0.963779	-0.493706	-1.08589	-0.423702	2.30531	-1.50213	12.4369	0.000420936	0.0040127
ENSG00000267656	ENSG00000267656	-0.435093	-0.935334	-0.84568	0.515991	-0.0870985	0.540991	0.506503	-0.352034	0.198811	1.03196	0.00110936	12.4348	0.000421413	0.00401554
ENSG00000300062	ENSG00000300062	-4.58787	-4.58787	-4.58787	-3.64117	-3.59974	-3.05764	-2.99816	-3.63254	-3.09538	4.55893	-3.6282	12.4342	0.000421538	0.00401554
ENSG00000286415	ENSG00000286415	-4.58787	-4.58787	-3.56511	-2.66857	-2.60571	-1.66014	-3.58431	-2.33809	-1.7711	3.28034	-2.71275	12.4227	0.000424157	0.00403758
ENSG00000123178	SPRYD7	3.93656	3.98235	3.88763	4.26661	4.31316	4.21511	4.46226	4.26113	4.36677	0.380795	4.20042	12.4202	0.000424706	0.00404135
ENSG00000137770	CTDSPL2	4.1466	4.34326	4.27099	4.59599	4.54568	4.50805	4.80941	4.76133	4.86438	0.431426	4.55716	12.4127	0.000426421	0.00405622
ENSG00000113318	MSH3	4.20408	4.21826	4.23199	4.51435	4.60871	4.54491	5.22418	5.35556	5.11623	0.718322	4.73342	12.4098	0.00042709	0.00406112
ENSG00000148158	SNX30	4.19208	4.18365	4.09382	4.5385	4.53172	4.52905	4.49605	4.54672	4.41177	0.353559	4.40164	12.4054	0.000428092	0.00406919
ENSG00000196072	BLOC1S2	4.26591	4.35462	4.18852	4.66451	4.69211	4.74087	4.56898	4.59181	4.56059	0.367523	4.52598	12.3833	0.000433193	0.00411619
ENSG00000163597	SNHG16	6.00151	6.02775	6.02238	6.48221	6.56541	6.47202	6.25608	6.25325	6.29977	0.376413	6.27861	12.3777	0.000434499	0.00412563
ENSG00000214784	RPS3AP21	4.68099	4.71559	4.81479	5.17552	5.01586	5.07753	4.97575	5.24553	5.15135	0.372208	4.99639	12.3663	0.000437147	0.0041478
ENSG00000084073	ZMPSTE24	6.05361	5.98041	5.99595	6.18734	6.30456	6.35649	6.73213	6.70591	6.74604	0.513102	6.37165	12.362	0.000438167	0.0041545
ENSG00000122376	SHLD2	4.42381	4.29396	4.48097	4.77227	4.85185	4.83714	4.75015	4.75821	4.634	0.368542	4.65676	12.3495	0.000441105	0.00418085
ENSG00000164109	MAD2L1	5.08867	4.95828	4.96801	5.2866	5.18111	5.41744	5.57659	5.68392	5.70131	0.481715	5.34419	12.3484	0.000441358	0.00418175
ENSG00000151116	UEVLD	3.03566	2.9303	2.93279	3.29262	3.38839	3.19688	3.58915	3.62544	3.59199	0.491063	3.3109	12.3323	0.000445197	0.00421511
ENSG00000179588	ZFPM1	2.54701	2.71804	2.74704	3.16816	2.91199	3.02313	3.22979	3.26132	3.22783	0.470822	3.00238	12.291	0.000455148	0.00429548
ENSG00000089009	RPL6	8.2998	8.26987	8.23774	8.54176	8.56455	8.52677	8.63637	8.54552	8.57466	0.296045	8.47329	12.2877	0.00045595	0.00430152
ENSG00000120158	RCL1	5.91288	5.91862	5.98475	6.63025	6.58982	6.56528	6.17913	6.17706	6.24487	0.47275	6.27062	12.2861	0.000456349	0.00430375
ENSG00000175582	RAB6A	5.80105	5.88082	5.92386	6.11413	6.15235	6.1237	6.53819	6.48694	6.47268	0.457276	6.18969	12.256	0.000463753	0.0043689
ENSG00000115540	MOB4	2.32004	1.93057	1.87464	2.62612	2.62686	2.90711	2.27094	2.73554	2.71213	0.608682	2.48459	12.243	0.000467014	0.00439492
ENSG00000138430	OLA1	5.90765	5.94704	5.87934	6.0767	6.25249	6.19114	6.54756	6.46287	6.49898	0.437188	6.21716	12.2408	0.00046757	0.00439858
ENSG00000089195	TRMT6	4.44708	4.39231	4.40558	4.68412	4.86203	4.58912	5.0486	5.17087	5.13493	0.516927	4.77897	12.2226	0.000472139	0.00443998
ENSG00000243725	TTC4	-1.43909	-2.17082	-2.38269	-0.602423	-0.362513	0.190153	-0.773904	-1.14695	-1.17193	1.53173	-0.883227	12.2197	0.000472865	0.00444524
ENSG00000088930	XRN2	6.3533	6.36686	6.40053	6.63305	6.72871	6.58666	7.1897	7.1747	7.14651	0.560259	6.7701	12.2164	0.000473718	0.00445167
ENSG00000105991	HOXA1	-1.82858	-0.828709	-2.55386	-0.0772004	-0.252981	-0.758199	-0.0892139	-0.544012	-0.423702	1.31858	-0.638064	12.2134	0.000474467	0.00445713
ENSG00000172602	RND1	-3.5528	-3.61362	-3.56511	-1.87312	-2.02274	-2.64959	-1.25953	-1.85796	-2.81458	2.261	-2.33511	12.196	0.000478912	0.00449729
ENSG00000169193	CCDC126	0.6694	0.59039	0.478304	1.25951	1.103	1.46999	0.894822	1.34517	1.18844	0.655562	1.03964	12.186	0.000481491	0.00451669
ENSG00000218350	LYPLA1P3	2.05057	2.2186	1.98821	2.35419	2.54833	2.53926	2.87864	3.08334	2.81364	0.638357	2.54146	12.1872	0.000481178	0.00451669
ENSG00000258751	ENSG00000258751	-4.58787	-3.61362	-4.58787	-2.09286	-4.58787	-1.85127	-1.18911	-1.66698	-1.5426	3.83951	-2.31448	12.1863	0.00048141	0.00451669
ENSG00000198900	TOP1	4.19723	4.22291	4.35657	4.5728	4.64808	4.47149	5.12141	4.9788	5.02338	0.563748	4.6591	12.1713	0.000485317	0.00454935
ENSG00000172301	COPRS	6.49123	6.5956	6.62971	7.28989	7.32439	7.24998	6.8129	6.82497	6.87894	0.508094	6.93102	12.1676	0.000486266	0.00455663
ENSG00000126698	DNAJC8	6.521	6.48657	6.50338	6.74232	6.85642	6.80145	6.90759	6.80898	6.76951	0.311843	6.71882	12.1601	0.000488238	0.00457187
ENSG00000261609	GAN	3.04713	3.1996	3.09371	3.31795	3.54066	3.46909	3.69069	3.677	3.77269	0.471577	3.44507	12.1498	0.000490937	0.00459552
ENSG00000137266	SLC22A23	-0.200029	0.268815	-0.222992	0.628238	0.692684	1.05876	0.527567	0.815295	0.510248	0.774648	0.512627	12.1435	0.000492586	0.00460933
ENSG00000203883	SOX18	1.80251	1.89989	1.93254	2.54741	2.34269	2.43838	2.07739	2.45131	2.46523	0.519785	2.24275	12.1397	0.000493592	0.0046171
ENSG00000180574	EIF2S3B	6.70721	6.73631	6.82525	6.96864	7.0748	6.98345	7.36469	7.33471	7.29755	0.423091	7.05244	12.1385	0.000493909	0.00461844
ENSG00000155761	SPAG17	-2.95634	-3.61362	-2.97263	-1.68247	-1.6087	-2.33187	-1.58164	-1.66698	-2.37764	1.73224	-2.14628	12.1368	0.000494361	0.00462102
ENSG00000113580	NR3C1	4.4061	4.40875	4.44448	4.75383	4.76228	4.58676	5.09872	5.05364	5.01218	0.470502	4.74951	12.1187	0.000499186	0.00466283
ENSG00000109189	USP46	3.43826	3.69572	3.40841	3.73427	3.87016	3.9769	4.14545	4.24488	4.07986	0.499331	3.87075	12.1166	0.000499743	0.00466447
ENSG00000225022	UBE2D3P1	3.65612	3.613	3.80146	4.10788	3.98827	3.9715	4.19731	4.18575	4.0691	0.398104	3.96879	12.1161	0.000499891	0.00466447
ENSG00000131037	EPS8L1	2.46389	2.29133	2.28346	3.39137	3.19897	3.40101	2.66713	2.69696	2.79808	0.716568	2.86048	12.0936	0.000505953	0.00470656
ENSG00000242689	CNTF	0.311944	0.736475	0.386584	1.30525	1.36596	1.18868	1.14704	1.13039	0.766245	0.688656	0.975442	12.0953	0.000505479	0.00470656
ENSG00000152620	NADK2	4.33615	4.39093	4.46144	4.72677	4.57569	4.7451	5.10662	5.01235	5.08451	0.492461	4.74287	12.0835	0.000508698	0.00472996
ENSG00000205740	ENSG00000205740	1.90691	1.55071	1.74214	2.24692	2.44376	2.11791	2.38498	2.11662	2.25337	0.531408	2.11088	12.0538	0.000516871	0.0047992
ENSG00000304651	ENSG00000304651	-1.35618	-1.31263	-2.22969	-0.405331	0.196508	-0.418356	-0.627013	-0.864608	-0.690107	1.24943	-0.712375	12.0497	0.00051802	0.00480818
ENSG00000136542	GALNT5	-4.58787	-3.61362	-4.58787	-2.66857	-2.60571	-3.62872	-1.41162	-1.49834	-2.37764	3.46204	-2.58927	12.0473	0.000518663	0.00481247
ENSG00000128342	LIF	3.99695	3.87994	3.88763	4.77329	4.66678	4.76711	4.2741	4.20267	4.19523	0.582396	4.33469	12.0411	0.000520408	0.00482527
ENSG00000151923	TIAL1	6.29718	6.28871	6.37726	6.59528	6.57751	6.53231	6.79211	6.76899	6.76351	0.353918	6.56685	12.0388	0.000521039	0.00482908
ENSG00000091651	ORC6	5.16346	5.27759	5.25329	5.57446	5.57381	5.56771	5.54207	5.50694	5.5384	0.318716	5.45224	12.0347	0.000522201	0.0048368
ENSG00000177054	ZDHHC13	3.09579	3.18694	3.16445	3.41242	3.41076	3.56314	3.89496	3.83732	3.81968	0.521954	3.51651	12.0279	0.0005241	0.00484421
ENSG00000169372	CRADD	3.07727	3.09512	3.05699	3.53269	3.53304	3.50944	3.48531	3.36064	3.37842	0.393789	3.34941	12.0209	0.000526067	0.004859
ENSG00000164045	CDC25A	4.31575	4.46092	4.46425	4.73202	4.7612	4.62514	4.84445	4.913	4.87059	0.379198	4.67862	12.011	0.000528887	0.00488334
ENSG00000054116	TRAPPC3	7.26829	7.23535	7.22981	7.67379	7.68249	7.66604	7.46807	7.46189	7.51857	0.337293	7.47789	12.0065	0.000530159	0.00489338
ENSG00000187555	USP7	7.0975	7.20056	7.23804	7.39727	7.48337	7.39585	7.7084	7.70441	7.65852	0.384516	7.44726	12.0057	0.000530391	0.00489381
ENSG00000128641	MYO1B	5.40988	5.4746	5.41654	5.74548	5.71923	5.62679	6.1136	6.12433	6.10802	0.487924	5.77665	11.9958	0.000533192	0.00491623
ENSG00000196155	PLEKHG4	4.85202	4.7823	4.83336	5.46472	5.45036	5.42141	4.99004	5.16145	5.12353	0.458294	5.14347	11.9938	0.000533766	0.00491808
ENSG00000031003	FAM13B	4.53251	4.5697	4.6569	4.77837	4.99473	4.86462	5.38358	5.40559	5.28108	0.552602	4.97765	11.9877	0.000535538	0.00493097
ENSG00000170088	TMEM192	4.1197	4.14818	4.21875	4.35899	4.52276	4.47659	4.80726	4.88563	4.71909	0.478499	4.4982	11.9881	0.000535424	0.00493097
ENSG00000141385	AFG3L2	6.68567	6.64356	6.68068	7.0605	7.04919	6.99837	6.88405	6.93955	6.95663	0.312777	6.88585	11.9746	0.000539312	0.00496055
ENSG00000163138	PACRGL	2.39376	2.142	2.54444	2.85484	2.86416	2.78093	3.1741	2.92917	2.71213	0.528816	2.73942	11.9622	0.000542909	0.00499189
ENSG00000150457	LATS2	5.43629	5.5611	5.44097	5.77016	5.73205	5.80503	5.83075	5.85767	5.81391	0.321664	5.70276	11.9567	0.000544517	0.00500494
ENSG00000166938	DIS3L	4.88434	4.65716	4.83336	5.05098	5.05721	5.1399	5.55303	5.58647	5.56316	0.551317	5.18421	11.946	0.000547642	0.00502493
ENSG00000116237	ICMT	7.90532	7.87624	7.84773	8.18567	8.16761	8.2252	8.11915	8.17692	8.13641	0.292344	8.0779	11.9419	0.000548847	0.00503424
ENSG00000055044	NOP58	4.63866	4.58787	4.753	5.18625	5.27173	5.12699	5.04951	4.84014	4.95486	0.418013	4.95266	11.9318	0.000551841	0.00505994
ENSG00000048392	RRM2B	3.33289	3.01148	3.28048	3.62802	3.79776	3.62413	3.6189	3.7479	3.48592	0.441938	3.5222	11.9303	0.000552278	0.0050622
ENSG00000230584	CCT5P2	0.337076	0.787656	0.156033	1.25951	1.17009	1.23755	1.14704	0.846958	1.0725	0.689288	0.937956	11.9293	0.000552572	0.00506314
ENSG00000011198	ABHD5	4.2395	4.17085	4.10105	4.42393	4.41348	4.53883	4.91209	4.87223	4.92771	0.52803	4.5435	11.9222	0.000554702	0.00507913
ENSG00000153044	CENPH	4.48833	4.46878	4.31208	4.62447	4.78814	4.71845	5.11881	5.14483	5.07594	0.501858	4.77791	11.9091	0.000558603	0.00510601
ENSG00000154813	DPH3	3.58447	3.54522	3.5499	3.91849	3.83545	3.93678	3.92305	3.98693	3.92372	0.362658	3.81077	11.9094	0.000558516	0.00510601
ENSG00000160345	PIERCE1	2.89042	2.95662	3.12597	3.3401	3.49429	3.36023	3.35586	3.59079	3.36792	0.428967	3.29272	11.9092	0.000558586	0.00510601
ENSG00000130764	LRRC47	6.3127	6.37734	6.33878	6.83613	6.86353	6.84274	6.52319	6.63144	6.60301	0.380013	6.60717	11.9012	0.000560983	0.00512423
ENSG00000306206	ENSG00000306206	0.727576	0.770797	0.288634	1.46494	1.78946	1.42851	1.34987	1.25363	0.849117	0.788753	1.17225	11.8983	0.000561855	0.00513042
ENSG00000188243	COMMD6	4.60543	4.7461	4.58135	5.0213	4.96953	5.05895	4.91709	4.94078	5.02114	0.343059	4.88354	11.8573	0.000574357	0.00523193
ENSG00000164221	CCDC112	1.18057	1.03362	0.543459	1.94848	2.14341	2.28412	1.70456	1.57052	1.13989	0.918813	1.60788	11.8502	0.000576563	0.00525022
ENSG00000171793	CTPS1	8.21793	8.26837	8.29256	8.68491	8.67037	8.64814	8.48222	8.53356	8.47503	0.325167	8.48462	11.8458	0.000577926	0.00526017
ENSG00000307232	ENSG00000307232	-4.58787	-4.02002	-4.58787	-3.33014	-3.59974	-2.482	-2.99816	-2.33809	-2.04273	3.57391	-3.08397	11.8454	0.000578054	0.00526017
ENSG00000172671	ZFAND4	1.54651	1.33828	1.56518	2.09892	1.88042	2.27829	2.2136	1.83018	1.94026	0.571573	1.88631	11.8412	0.000579347	0.00527012
ENSG00000145743	FBXL17	3.236	2.97882	3.17819	3.39137	3.48641	3.52428	4.06309	3.98693	3.93799	0.623576	3.5773	11.8401	0.000579699	0.00527151
ENSG00000188342	GTF2F2	3.71482	3.76546	3.72862	3.90741	4.20533	4.1075	4.26942	4.11761	4.19127	0.40155	4.01574	11.8357	0.000581049	0.00528197
ENSG00000072163	LIMS2	3.95088	3.69124	4.04215	4.29948	4.23384	4.36006	4.29882	4.25081	4.30939	0.39177	4.17387	11.8241	0.000584689	0.00530776
ENSG00000166224	SGPL1	5.21097	5.39501	5.28539	5.7434	5.73815	5.59843	5.57153	5.5964	5.60027	0.34426	5.53737	11.8228	0.000585087	0.00530955
ENSG00000183508	TENT5C	4.62469	4.52139	4.51927	4.85439	4.93329	4.82321	5.59604	5.63205	5.51241	0.714083	5.06812	11.8075	0.00058994	0.00534625
ENSG00000116455	WDR77	6.59449	6.58569	6.54076	7.25097	7.21584	7.30313	6.76604	6.84078	6.8737	0.484655	6.91418	11.7995	0.000592478	0.00536558
ENSG00000169330	MINAR1	-0.616197	-0.245004	-0.29711	0.628238	0.247104	0.00500069	0.463428	0.324286	0.632264	0.802725	0.18285	11.7988	0.000592696	0.00536572
ENSG00000121966	CXCR4	6.92072	6.96357	6.97077	7.36826	7.35769	7.36714	7.19609	7.18209	7.18938	0.327738	7.17831	11.7962	0.000593502	0.00537118
ENSG00000197245	FAM110D	-1.0653	-0.935334	-0.84568	-0.520328	0.144072	-0.0525786	-0.188772	0.453318	-0.157866	0.979725	-0.266014	11.7888	0.000595891	0.00539095
ENSG00000168288	MMADHC	5.91392	5.8675	5.82469	6.08163	6.20529	6.07328	6.3152	6.36648	6.35177	0.368215	6.12468	11.7876	0.000596275	0.00539258
ENSG00000004961	HCCS	5.85152	5.83947	5.87301	6.52784	6.52273	6.51971	6.17371	6.0717	6.07612	0.4763	6.18883	11.7734	0.000600831	0.00543007
ENSG00000147408	CSGALNACT1	5.78972	5.71885	5.83448	6.02124	6.01448	6.04782	6.34813	6.32563	6.34777	0.411003	6.06823	11.7542	0.000607073	0.00548086
ENSG00000157617	C2CD2	5.63366	5.60695	5.59041	5.9573	5.90942	5.76288	6.04313	6.09661	5.99542	0.354427	5.85598	11.7533	0.000607355	0.00548154
ENSG00000109861	CTSC	7.54801	7.62183	7.6189	7.84787	7.82045	7.81797	8.0798	8.11802	8.09655	0.37316	7.8558	11.7434	0.000610602	0.00550896
ENSG00000121690	DEPDC7	3.37596	3.15482	3.20529	3.78762	3.75031	3.84122	3.59913	3.53113	3.55544	0.436579	3.5521	11.7366	0.000612839	0.00552348
ENSG00000144909	OSBPL11	4.27894	4.25054	4.09925	4.42911	4.59046	4.52782	5.03026	5.08053	5.14727	0.618902	4.65148	11.7368	0.000612753	0.00552348
ENSG00000115594	IL1R1	-1.43909	-1.05047	-1.96516	-0.645292	-0.703213	-0.711076	0.811397	0.552676	0.31998	1.61674	-0.278564	11.7341	0.00061365	0.00552703
ENSG00000148908	RGS10	4.3252	4.52767	4.42156	4.83989	4.87516	4.85389	4.72758	4.6513	4.7916	0.365162	4.68041	11.711	0.000621316	0.00558846
ENSG00000165238	WNK2	4.39418	4.32172	4.423	4.83014	4.74918	4.78776	4.56644	4.74671	4.73006	0.35798	4.62792	11.709	0.00062197	0.00559245
ENSG00000141522	ARHGDIA	8.01609	7.99339	7.97853	8.46125	8.44265	8.39659	8.20306	8.2351	8.24285	0.338121	8.23002	11.6853	0.000629947	0.00566032
ENSG00000134057	CCNB1	9.04218	9.05016	9.00558	9.58626	9.634	9.59694	9.28561	9.27033	9.23687	0.412499	9.32041	11.6843	0.000630283	0.00566141
ENSG00000137492	THAP12	4.70049	4.72438	4.74495	5.00233	5.08007	4.93111	5.58037	5.43454	5.55006	0.56443	5.12258	11.6712	0.000634743	0.00569954
ENSG00000118690	ARMC2	1.42284	1.16846	1.19794	1.67989	1.75491	1.66121	1.86211	1.83808	1.8526	0.516412	1.62596	11.6684	0.000635708	0.00570433
ENSG00000152457	DCLRE1C	2.91567	3.04341	2.84506	3.23469	3.35993	3.18135	3.73438	3.7161	3.67952	0.567122	3.33736	11.6669	0.000636228	0.00570512
ENSG00000101442	ACTR5	4.40015	4.54265	4.44306	5.70232	5.72761	5.66748	4.77679	4.82233	4.80981	0.85784	5.08698	11.6628	0.000637613	0.00571367
ENSG00000035687	ADSS2	5.25861	5.21119	5.27264	5.48039	5.56012	5.45795	5.79483	5.71428	5.75267	0.385235	5.51544	11.6458	0.000643476	0.0057623
ENSG00000138071	ACTR2	7.06661	7.15763	7.11996	7.39941	7.3745	7.40957	8.04815	8.03937	8.03993	0.639476	7.57122	11.6344	0.000647429	0.00579377
ENSG00000135521	LTV1	1.1383	1.04769	1.43388	1.71421	1.99587	1.7053	1.93487	1.77364	1.56455	0.582946	1.62299	11.6217	0.00065185	0.0058294
ENSG00000259786	LINC02109	-4.58787	-4.58787	-4.58787	-3.07442	-4.58787	-3.62872	-2.58253	-2.07815	-2.04273	5.37931	-3.17084	11.6182	0.00065311	0.00583869
ENSG00000068305	MEF2A	4.55411	4.65026	4.4782	4.7466	4.85492	4.90677	5.11534	5.0705	5.06731	0.403924	4.84385	11.6087	0.000656439	0.0058625
ENSG00000161671	EMC10	2.61537	2.70034	2.50682	3.48875	3.47585	3.31541	2.93885	3.05312	2.84931	0.603417	3.03663	11.6054	0.000657594	0.00587083
ENSG00000211689	TRGC1	-1.82858	-2.30737	-1.64175	-0.987415	-0.752067	-1.1398	-0.627013	-0.503519	-1.3454	1.17062	-1.12567	11.5966	0.000660729	0.00589485
ENSG00000128463	EMC4	6.36442	6.26896	6.24722	6.60703	6.58767	6.61756	6.59978	6.60246	6.54632	0.299444	6.50066	11.5808	0.000666378	0.00593923
ENSG00000205765	RIMOC1	5.42827	5.4798	5.49275	5.63225	5.73593	5.79384	6.09079	6.11054	6.09747	0.456155	5.78656	11.5797	0.000666759	0.00594062
ENSG00000005302	MSL3	5.2871	5.14322	5.20545	5.4897	5.52146	5.49547	5.70811	5.51188	5.58221	0.340704	5.44871	11.5693	0.000670509	0.005968
ENSG00000134255	CEPT1	4.8886	5.00769	4.97885	5.20975	5.22516	5.27183	5.49472	5.34243	5.33419	0.357126	5.20675	11.5698	0.000670306	0.005968
ENSG00000146574	CCZ1B	4.10697	4.2291	4.17144	4.46985	4.50078	4.44443	4.50005	4.57181	4.62521	0.350039	4.41246	11.5664	0.000671538	0.00597482
ENSG00000179674	ARL14	-4.58787	-4.58787	-4.58787	-2.35219	-3.01875	-3.05764	-2.26024	-3.63254	-4.58787	5.11888	-3.30181	11.56	0.000673867	0.00599184
ENSG00000066777	ARFGEF1	4.09781	4.23064	4.0829	4.46356	4.58186	4.28215	4.63234	4.72131	4.62815	0.420131	4.43158	11.5565	0.000675124	0.00600101
ENSG00000115107	STEAP3	3.20562	3.18057	3.23846	3.83127	3.61719	3.63784	3.37632	3.65927	3.66815	0.431221	3.5085	11.5456	0.000679103	0.00603232
ENSG00000083844	ZNF264	3.84973	3.98965	4.16283	4.38585	4.37845	4.49177	4.23941	4.43397	4.44212	0.391719	4.27851	11.5245	0.000686866	0.00609513
ENSG00000166401	SERPINB8	3.14643	3.21214	3.1153	3.42284	3.68529	3.39833	3.71843	3.57197	3.7486	0.43941	3.46516	11.5203	0.000688411	0.00610679
ENSG00000154845	PPP4R1	6.16307	6.1205	6.1655	6.41956	6.48667	6.36613	6.49973	6.48882	6.44962	0.302839	6.35851	11.4957	0.000697557	0.00617756
ENSG00000259838	ELOCP2	3.22595	2.88401	3.20529	3.61219	3.908	3.72609	3.55108	3.49661	3.36792	0.510612	3.47099	11.494	0.000698212	0.00618129
ENSG00000060138	YBX3	8.54313	8.57198	8.57843	8.82295	8.82071	8.82009	8.85563	8.89809	8.85729	0.281498	8.75821	11.4917	0.000699071	0.00618683
ENSG00000111605	CPSF6	7.10392	7.13928	7.13875	7.34227	7.36737	7.36285	7.53884	7.54839	7.57634	0.332025	7.35701	11.4812	0.000703042	0.00621157
ENSG00000161654	LSM12	4.49113	4.51507	4.29641	4.69705	4.78494	5.05299	4.75574	4.80329	4.87677	0.396042	4.71289	11.479	0.000703887	0.00621489
ENSG00000171204	TMEM126B	4.71254	4.52642	4.60951	5.0006	4.88518	4.9732	4.99478	4.94536	4.91575	0.335749	4.84988	11.4765	0.00070481	0.00622096
ENSG00000071243	ING3	2.64083	2.75279	2.63691	2.96938	3.00313	3.0711	3.44159	3.38241	3.16047	0.507218	3.03347	11.46	0.000711099	0.00626833
ENSG00000188610	FAM72B	3.11044	3.0222	3.19856	3.52787	3.63155	3.55352	3.46362	3.377	3.48268	0.398021	3.38796	11.4559	0.000712658	0.00627975
ENSG00000206560	ANKRD28	1.98053	1.89989	1.98038	2.43872	2.29539	2.30146	2.436	2.43578	2.72316	0.493616	2.29857	11.4383	0.000719459	0.00633334
ENSG00000171302	CANT1	7.24939	7.25234	7.25516	7.64253	7.61441	7.58073	7.49623	7.4988	7.48252	0.301732	7.46022	11.4352	0.000720664	0.00634184
ENSG00000114302	PRKAR2A	7.12278	7.19029	7.18967	7.36151	7.49028	7.35439	7.64174	7.659	7.66372	0.366683	7.42241	11.4234	0.000725251	0.00638009
ENSG00000078018	MAP2	-4.58787	-4.58787	-4.58787	-3.07442	-3.59974	-3.62872	-3.58431	-3.63254	-2.81458	4.47909	-3.66952	11.4124	0.000729572	0.0064117
ENSG00000154734	ADAMTS1	5.23373	5.16758	5.1715	5.61306	5.69095	5.54544	5.47045	5.44557	5.43572	0.345901	5.43047	11.4102	0.000730401	0.00641685
ENSG00000185614	INKA1	-0.716056	-0.0526732	-0.222992	0.628238	0.912379	0.885636	0.251889	0.681196	-0.00446324	0.935187	0.361135	11.409	0.000730876	0.00641889
ENSG00000104450	SPAG1	2.69043	2.8722	2.69542	2.99054	3.08885	3.27795	3.63597	3.78515	3.3992	0.637953	3.2083	11.408	0.000731279	0.00641914
ENSG00000297007	ENSG00000297007	-2.53559	-3.2969	-2.22969	-1.43675	-2.02274	-0.963779	-0.371682	-1.5802	-1.01711	1.75769	-1.48921	11.4077	0.00073139	0.00641914
ENSG00000053372	MRTO4	7.53551	7.49716	7.49724	8.26369	8.25799	8.2495	7.72744	7.72172	7.82436	0.519312	7.8761	11.4029	0.00073329	0.00643368
ENSG00000073712	FERMT2	1.89002	2.15505	2.30241	2.70077	2.25269	2.6244	2.89494	2.92917	2.96065	0.624358	2.56744	11.3923	0.000737502	0.00646849
ENSG00000111142	METAP2	5.98372	5.97858	5.92692	6.30319	6.21008	6.26223	6.35035	6.29582	6.19475	0.307384	6.17516	11.3894	0.000738655	0.00647431
ENSG00000221983	UBA52	1.35064	1.41624	1.04134	2.39178	2.25887	2.39057	1.63832	2.00175	1.5019	0.805438	1.85636	11.3714	0.000745818	0.00652412
ENSG00000100796	PPP4R3A	4.87686	4.89259	4.76444	5.10533	5.1507	5.04872	5.42416	5.4175	5.36356	0.414324	5.13452	11.3678	0.0007473	0.00653492
ENSG00000069956	MAPK6	3.54727	3.72883	3.62958	4.00594	3.8762	3.93308	4.3034	4.51258	4.43711	0.563449	4.03521	11.3633	0.000749085	0.00654837
ENSG00000154359	LONRF1	-2.53559	-2.30737	-1.96516	-1.68247	-0.909418	-0.85733	-0.773904	-1.49834	-1.17193	1.30608	-1.40046	11.3606	0.000750171	0.00655569
ENSG00000198730	CTR9	5.56285	5.64329	5.56644	5.8173	5.85439	5.90388	6.4475	6.41548	6.43796	0.58364	6.00512	11.3587	0.000750942	0.00656026
ENSG00000276529	ENSG00000276529	1.26156	1.55071	1.70465	2.11185	2.14341	2.20033	1.75901	2.00877	2.17522	0.562165	1.91122	11.3474	0.000755522	0.00659809
ENSG00000279800	BCLAF1P2	2.73365	2.80755	2.75164	3.28122	3.40241	3.23046	3.13689	3.17663	2.96531	0.443657	3.07329	11.3359	0.000760244	0.00663495
ENSG00000182704	TSKU	7.01376	7.0195	6.96236	7.46575	7.37201	7.35127	7.21954	7.26573	7.22981	0.321421	7.22071	11.3289	0.000763109	0.00665775
ENSG00000006611	USH1C	-0.522805	0.00613244	-0.638772	0.698493	0.973758	1.05876	0.00391521	0.645629	0.134184	1.03235	0.383635	11.3266	0.000764037	0.00666365
ENSG00000105058	FAM32A	5.64753	5.48756	5.54473	5.93928	5.90746	5.99773	5.81317	5.81528	5.85146	0.327954	5.78788	11.3197	0.000766876	0.00668621
ENSG00000271254	ENSG00000271254	0.801666	1.14248	1.2767	2.23515	2.10962	1.71396	1.52767	1.67124	1.51465	0.748002	1.61951	11.319	0.000767198	0.00668681
ENSG00000100345	MYH9	10.4976	10.4997	10.4976	11.348	11.3157	11.2819	10.7346	10.7715	10.7425	0.561811	10.896	11.3143	0.000769131	0.00670145
ENSG00000301446	ENSG00000301446	-3.22396	-3.61362	-3.56511	-1.10217	-0.522829	-0.207462	-3.58431	-2.33809	-1.7711	2.92906	-1.62663	11.2947	0.000777279	0.00674356
ENSG00000102804	TSC22D1	8.15506	8.18721	8.12807	8.41064	8.4111	8.44486	8.42145	8.45756	8.47584	0.280147	8.34965	11.2928	0.000778099	0.00674846
ENSG00000132341	RAN	10.3884	10.4079	10.375	11.1526	11.1327	11.1669	10.6413	10.621	10.6349	0.524306	10.7603	11.2888	0.000779761	0.00676066
ENSG00000182759	MAFA	1.37511	1.2799	1.70465	1.7966	1.83151	2.0715	2.41919	2.69261	2.71766	0.846941	2.07244	11.2728	0.000786513	0.00681472
ENSG00000115350	POLE4	4.78396	4.86803	4.91051	5.7722	5.8271	5.76079	5.0676	5.12721	5.22884	0.64628	5.31595	11.272	0.000786867	0.00681556
ENSG00000189376	C8orf76	1.43453	1.00508	1.64652	1.82828	1.981	1.76485	2.11267	2.16138	2.04065	0.611236	1.81372	11.254	0.00079453	0.00687293
ENSG00000138100	TRIM54	-2.95634	-2.4582	-4.58787	-1.36334	-1.28738	-1.49139	-2.58253	-1.5802	-1.5426	1.89067	-1.92831	11.2513	0.000795671	0.00688055
ENSG00000103707	MTFMT	4.46714	4.52767	4.5592	4.836	4.88018	4.7451	4.87045	4.82532	4.97576	0.338655	4.75277	11.2445	0.000798597	0.0069036
ENSG00000230865	TSEN15P1	-4.58787	-4.58787	-4.58787	-2.66857	-3.01875	-4.58787	-2.99816	-2.65541	-3.44437	4.9028	-3.4376	11.2391	0.000800916	0.00692138
ENSG00000118197	DDX59	4.71254	4.64565	4.83119	4.92569	5.11284	4.98844	5.19896	5.18874	5.15746	0.367517	4.98662	11.2335	0.000803344	0.0069401
ENSG00000204856	FAM216A	4.12331	4.03625	4.06267	4.62221	4.62674	4.51302	4.3544	4.24933	4.46529	0.40465	4.35584	11.222	0.000808321	0.00697383
ENSG00000115419	GLS	2.56308	2.89572	2.27709	3.05221	3.18606	3.06095	3.0881	3.24359	2.99745	0.508437	2.95791	11.2037	0.000816341	0.0070317
ENSG00000198668	CALM1	5.96419	5.95452	5.91414	6.16503	6.1709	6.19075	6.4974	6.46765	6.45418	0.387682	6.21402	11.1978	0.000818946	0.00704725
ENSG00000150776	NKAPD1	4.80325	4.85709	4.66668	5.0006	5.12557	5.02804	5.62137	5.52784	5.57994	0.5608	5.17441	11.1907	0.000822076	0.0070684
ENSG00000230091	TMEM254-AS1	-2.95634	-3.61362	-4.58787	-1.29348	-1.6087	-2.83924	-2.58253	-1.66698	-2.04273	2.34834	-2.26937	11.1887	0.00082298	0.00707046
ENSG00000174343	CHRNA9	3.46985	3.4767	3.4795	3.88499	3.75687	3.80115	4.74342	4.78297	4.71357	0.881681	4.11635	11.1851	0.000824559	0.00708172
ENSG00000143878	RHOB	8.34599	8.35381	8.37337	8.77117	8.64775	8.80161	8.54748	8.62065	8.62817	0.314503	8.57483	11.1814	0.000826207	0.00709358
ENSG00000162368	CMPK1	5.9652	5.87096	5.79712	6.05844	6.06823	6.31191	6.34109	6.34377	6.4088	0.382615	6.1453	11.1788	0.000827359	0.00710116
ENSG00000175550	DRAP1	6.58272	6.5962	6.60003	7.48917	7.42893	7.38403	6.80834	6.88578	6.86033	0.579767	7.00402	11.1718	0.000830505	0.00712354
ENSG00000067066	SP100	0.523772	0.406158	0.183546	0.890803	1.06119	0.706327	0.973686	1.27707	1.29575	0.684436	0.856237	11.1667	0.000832803	0.00714094
ENSG00000235554	SRSF6P2	2.70014	2.41584	2.74242	3.48379	3.35418	3.28958	2.95837	3.0153	2.9181	0.56416	3.02338	11.1614	0.000835186	0.00715672
ENSG00000170185	USP38	3.13931	2.59892	3.02693	3.30393	3.25568	3.37668	3.65763	3.55529	3.72959	0.553319	3.32886	11.1576	0.000836871	0.00716652
ENSG00000152133	GPATCH11	3.65612	3.27924	3.27089	3.71321	3.82716	3.68043	4.19072	4.12893	4.18928	0.559432	3.80803	11.1534	0.000838763	0.00717807
ENSG00000119314	PTBP3	5.64628	5.55373	5.51593	5.69428	5.84467	5.98347	6.32614	6.38749	6.30712	0.541502	5.95532	11.1491	0.000840725	0.00719021
ENSG00000146700	SSC4D	1.80251	1.69174	1.74214	2.42842	2.36577	2.3129	2.04123	2.28789	2.01395	0.511777	2.10233	11.1446	0.00084278	0.00720545
ENSG00000070882	OSBPL3	5.19903	5.28799	5.27184	5.54616	5.52595	5.44955	5.7757	5.67733	5.64372	0.353783	5.49857	11.1205	0.000853771	0.00729079
ENSG00000110435	PDHX	6.05645	6.10964	6.01665	6.31162	6.32089	6.3112	6.46432	6.40022	6.38946	0.306053	6.27245	11.0982	0.00086411	0.00736876
ENSG00000177150	FAM210A	3.80765	3.89752	3.83655	4.12392	4.06783	4.20747	4.63598	4.59996	4.75848	0.577594	4.25638	11.0862	0.000869709	0.00741172
ENSG00000258717	ENSG00000258717	-2.53559	-4.58787	-4.58787	-1.97881	-1.6087	-2.33187	-1.99697	-2.33809	-1.90053	2.21747	-2.36486	11.0707	0.000877011	0.00746914
ENSG00000138758	SEPTIN11	2.3635	2.56997	2.21845	2.76356	2.67847	2.79324	3.34106	3.37156	3.50202	0.725199	2.90952	11.0659	0.000879311	0.00748632
ENSG00000136048	DRAM1	5.5319	5.52574	5.48793	5.70552	5.80933	5.84055	6.40864	6.45101	6.42662	0.628024	5.96244	11.0456	0.000888958	0.00755629
ENSG00000140678	ITGAX	-4.58787	-3.03734	-4.58787	-3.07442	-2.28498	-2.64959	-1.77441	-0.971011	-1.3454	2.98929	-2.26451	11.0332	0.000894927	0.0075997
ENSG00000301340	ENSG00000301340	-2.95634	-1.63324	-2.97263	-0.782115	-1.43911	-1.95726	-0.0264647	-0.503519	-0.329542	1.88827	-1.08251	11.0296	0.00089669	0.00760978
ENSG00000178429	RPS3AP5	2.67079	2.30311	2.61687	2.92612	2.83138	3.47164	2.96611	3.27594	3.11095	0.579187	2.94693	11.0254	0.00089871	0.00762447
ENSG00000146007	ZMAT2	6.47963	6.48624	6.52505	6.72376	6.77012	6.86186	6.83815	6.76951	6.77283	0.293129	6.69892	11.0147	0.000903906	0.00766118
ENSG00000198818	SFT2D1	4.46856	4.33468	4.35051	4.78747	4.84776	4.88585	4.71501	4.61153	4.63692	0.366251	4.63938	11.0109	0.000905774	0.00767456
ENSG00000139644	TMBIM6	9.93772	9.95119	9.93876	10.1733	10.2074	10.1615	10.2413	10.2624	10.2693	0.277225	10.1332	11.0097	0.000906361	0.00767707
ENSG00000198142	SOWAHC	4.96717	4.87889	4.98668	5.2373	5.07482	5.50984	6.23263	6.11461	6.17531	0.853352	5.56509	11.0062	0.000908063	0.00768902
ENSG00000008294	SPAG9	5.85588	5.96567	5.94712	6.14118	6.21247	6.18337	6.7616	6.75915	6.70908	0.565286	6.32379	10.9965	0.00091283	0.00772444
ENSG00000114062	UBE3A	0.386064	0.531555	0.645911	1.04707	0.927971	0.915972	1.62861	1.44165	1.40935	0.743489	1.04888	10.9937	0.000914198	0.00773354
ENSG00000086827	ZW10	4.48271	4.44772	4.58264	4.69168	4.90008	4.74932	5.34257	5.22534	5.35472	0.56465	4.90472	10.9835	0.00091928	0.00777156
ENSG00000188725	SMIM15	4.47565	4.45302	4.31985	4.65239	4.58555	4.85975	4.98434	5.17711	5.11519	0.495047	4.76546	10.9757	0.000923138	0.0077995
ENSG00000158055	GRHL3	-1.82858	-1.72591	-1.37772	-0.987415	-0.0560938	-0.85733	-0.627013	-0.672795	0.404613	1.3529	-0.706419	10.9567	0.000932648	0.00787199
ENSG00000101310	SEC23B	6.65944	6.60157	6.57103	6.8239	6.88366	6.83854	7.05994	6.95348	7.00232	0.318437	6.83101	10.9294	0.00094651	0.0079788
ENSG00000116668	SWT1	1.31313	1.18128	1.50103	1.98407	1.90426	2.11137	1.78548	1.96615	1.55223	0.56801	1.73386	10.9266	0.000947953	0.00798842
ENSG00000167384	ZNF180	1.70935	1.18128	1.31452	1.95567	1.848	1.94481	2.11962	1.84594	2.01395	0.546119	1.79922	10.9184	0.00095212	0.00802098
ENSG00000162407	PLPP3	1.30041	1.2799	1.44529	1.83609	1.52819	1.82203	2.10568	2.19868	2.1095	0.614183	1.77503	10.9178	0.000952427	0.00802101
ENSG00000173559	NABP1	3.83657	3.93962	3.83655	4.23298	4.40097	4.59264	4.1607	4.21486	4.15508	0.431236	4.17237	10.9131	0.000954879	0.00803655
ENSG00000023572	GLRX2	5.05404	5.1126	5.08752	5.70232	5.70006	5.72537	5.31633	5.32286	5.32969	0.444767	5.39577	10.9062	0.000958447	0.00806144
ENSG00000170606	HSPA4	7.69163	7.68927	7.71777	7.94443	8.01435	7.91573	8.62748	8.617	8.59778	0.623802	8.1438	10.9063	0.000958357	0.00806144
ENSG00000067798	NAV3	-1.35618	-1.82494	-3.98769	-0.602423	-1.02474	-1.2036	-0.0264647	-0.151009	0.134184	1.80255	-0.774338	10.9047	0.000959213	0.00806532
ENSG00000170684	ZNF296	2.13181	2.61317	2.21845	3.57765	3.38557	3.44068	2.62377	2.61198	2.95131	0.818001	2.92752	10.8969	0.00096324	0.00809623
ENSG00000179010	MRFAP1	8.48994	8.43999	8.46748	8.76024	8.75482	8.74749	8.69195	8.75802	8.72374	0.273681	8.65401	10.8964	0.000963502	0.00809623
ENSG00000100934	SEC23A	5.86886	5.85905	5.79489	6.11774	6.0021	6.12491	6.47317	6.52536	6.55868	0.476365	6.17551	10.8955	0.000963975	0.00809763
ENSG00000158417	EIF5B	6.10847	6.20959	6.23782	6.44724	6.51372	6.32822	6.9018	6.85277	6.83069	0.476636	6.5208	10.8854	0.000969257	0.00813942
ENSG00000100292	HMOX1	5.20672	5.36303	5.28221	6.0939	6.07918	6.0606	5.65166	5.52356	5.45899	0.55199	5.67551	10.8741	0.000975206	0.00818418
ENSG00000097033	SH3GLB1	6.04553	6.07014	6.02713	6.27581	6.32015	6.2637	6.76188	6.81475	6.75009	0.504355	6.40256	10.8704	0.000977154	0.00819792
ENSG00000104635	SLC39A14	8.09083	8.1404	8.10431	8.37001	8.40989	8.36172	8.38593	8.37037	8.41264	0.273245	8.29978	10.8569	0.000984307	0.00824565
ENSG00000114988	LMAN2L	5.46293	5.48433	5.46849	6.05133	5.91872	5.99373	5.76686	5.64786	5.71381	0.384888	5.73933	10.8561	0.000984714	0.00824565
ENSG00000132819	RBM38	5.11434	5.1748	5.18177	6.14983	6.12005	6.22296	5.36761	5.40957	5.53684	0.6909	5.65214	10.8564	0.000984563	0.00824565
ENSG00000197894	ADH5	7.40195	7.37123	7.35287	7.6053	7.59958	7.6148	7.72074	7.71316	7.76423	0.295628	7.57913	10.8355	0.000995734	0.00833265
ENSG00000106803	SEC61B	6.50723	6.57693	6.4986	6.93902	6.91529	6.8946	6.73468	6.74477	6.80659	0.313567	6.74436	10.8273	0.00100014	0.00836162
ENSG00000088356	PDRG1	5.90555	5.80314	5.78033	6.61699	6.62462	6.62618	6.05088	6.05909	6.12683	0.546126	6.21649	10.8186	0.00100486	0.00839841
ENSG00000149418	ST14	4.62597	4.58184	4.64952	5.21799	5.16311	5.28642	4.75015	4.98147	4.89517	0.44295	4.9287	10.8143	0.00100717	0.00841237
ENSG00000168876	ANKRD49	2.44667	2.80341	2.6219	3.0217	3.08885	3.09781	2.96611	3.01878	3.3644	0.467711	2.95878	10.8047	0.00101245	0.00844579
ENSG00000177182	CLVS1	1.99639	2.14854	1.77868	2.25277	2.47593	2.34112	2.84966	2.60273	2.84931	0.600225	2.40606	10.7929	0.00101892	0.00849441
ENSG00000300329	ENSG00000300329	-4.58787	-4.58787	-4.58787	-2.66857	-2.28498	-4.03001	-3.58431	-3.63254	-3.44437	4.84191	-3.47366	10.7511	0.00104218	0.00867741
ENSG00000147654	EBAG9	3.54457	3.45311	3.6069	3.70043	3.908	3.8491	4.3095	4.23893	4.1632	0.509996	3.89434	10.7428	0.00104688	0.00870832
ENSG00000090932	DLL3	0.837331	0.787656	1.21137	2.2586	2.01789	1.85372	1.25201	1.45198	1.51465	0.823859	1.54708	10.7412	0.00104774	0.00871268
ENSG00000107951	MTPAP	4.06622	4.18524	4.28693	4.36845	4.53935	4.44183	4.75797	4.78706	4.74907	0.434754	4.48575	10.7375	0.00104984	0.00872746
ENSG00000104320	NBN	4.49811	4.55624	4.51115	4.92202	4.98731	4.8292	4.80294	4.79621	4.77976	0.333519	4.75236	10.7221	0.00105866	0.00879245
ENSG00000197265	GTF2E2	5.48558	5.49335	5.52403	5.78789	5.84158	5.77844	5.85752	5.78903	5.7303	0.297321	5.70574	10.7131	0.00106381	0.00882973
ENSG00000145817	YIPF5	5.49957	5.40119	5.55727	5.71084	5.68408	5.90577	6.50272	6.51431	6.50419	0.698178	5.98778	10.7048	0.0010686	0.00886388
ENSG00000115884	SDC1	7.07806	7.08085	7.05068	7.66175	7.6955	7.63545	7.25075	7.31291	7.30674	0.419753	7.36278	10.7037	0.00106922	0.00886626
ENSG00000105894	PTN	-0.522805	-1.31263	-0.152497	0.114871	0.144072	0.616822	0.00391521	0.493886	0.31998	0.93193	0.0603947	10.6718	0.00108784	0.00899547
ENSG00000154124	OTULIN	6.62191	6.5131	6.60258	6.76629	6.87136	6.78536	7.21163	7.21317	7.19954	0.442174	6.88916	10.6718	0.00108783	0.00899547
ENSG00000055130	CUL1	6.48842	6.55586	6.56287	6.73842	6.78998	6.7779	7.27859	7.27885	7.22957	0.50072	6.88832	10.6647	0.00109202	0.00901573
ENSG00000154945	ANKRD40	5.03689	5.07189	5.15856	5.39833	5.55197	5.43914	5.34776	5.46036	5.30145	0.329329	5.31737	10.6619	0.00109367	0.00902656
ENSG00000107537	PHYH	3.31086	3.40202	3.29316	3.5636	3.59295	3.69144	4.12314	4.14494	4.02299	0.542471	3.71835	10.6362	0.00110898	0.0091386
ENSG00000186198	SLC51B	-4.58787	-4.58787	-4.58787	-2.66857	-3.59974	-3.62872	-2.58253	-2.33809	-4.58787	5.00006	-3.36934	10.6315	0.0011118	0.00915903
ENSG00000102753	KPNA3	5.34554	5.40324	5.3498	5.6159	5.6002	5.61817	6.15226	6.15114	6.18979	0.548101	5.75363	10.6305	0.00111238	0.00916092
ENSG00000077147	TM9SF3	6.66813	6.61137	6.63377	6.80984	6.80405	6.98814	7.24956	7.17723	7.18864	0.409556	6.92339	10.6208	0.00111822	0.00920041
ENSG00000187589	TERF1P2	-4.58787	-4.58787	-4.58787	-3.64117	-4.58787	-2.64959	-2.26024	-2.33809	-3.44437	5.13402	-3.30033	10.6171	0.00112047	0.00921612
ENSG00000075131	TIPIN	4.58591	4.54265	4.48236	4.75177	4.83645	4.76294	5.19073	5.111	5.07701	0.428523	4.83658	10.6154	0.00112151	0.0092218
ENSG00000139915	MDGA2	-1.72091	-1.38635	-0.961443	-0.560792	-0.965927	-0.536616	0.666989	0.390244	0.484555	1.45287	-0.295312	10.5994	0.00113127	0.00929339
ENSG00000183255	PTTG1IP	7.90256	7.83704	7.87198	8.38806	8.38671	8.33855	8.07634	8.11009	8.06249	0.363716	8.12308	10.5873	0.00113864	0.00934044
ENSG00000260912	ENSG00000260912	0.1512	0.0900771	0.433172	0.435995	1.14363	0.706327	1.46354	1.50256	1.98676	1.08709	1.0137	10.5766	0.00114527	0.00938819
ENSG00000140153	WDR20	3.71482	3.93584	3.70982	4.08183	4.10088	4.15756	4.19731	4.19808	4.13458	0.355361	4.03691	10.571	0.00114874	0.00941052
ENSG00000307196	ENSG00000307196	-1.94493	-3.61362	-1.96516	0.140335	-0.440445	-0.0235017	-1.41162	-2.07815	-0.632745	2.01158	-0.936931	10.5684	0.0011504	0.0094183
ENSG00000122034	GTF3A	6.4294	6.43399	6.34298	6.7379	6.74255	6.63191	6.6369	6.70429	6.69515	0.289493	6.60196	10.5456	0.00116464	0.00952608
ENSG00000115524	SF3B1	7.29879	7.25101	7.33649	7.52389	7.58675	7.48265	8.09509	8.05036	8.09363	0.535868	7.67415	10.5415	0.00116724	0.00954439
ENSG00000136522	MRPL47	5.25614	5.30273	5.30039	5.81186	5.8503	5.77947	5.53624	5.45266	5.56162	0.38738	5.55576	10.5382	0.00116929	0.00955523
ENSG00000150316	CWC15	4.62979	4.68555	4.5592	5.02643	5.04027	5.10576	4.98529	4.83522	4.83925	0.350528	4.86827	10.5365	0.0011704	0.00955841
ENSG00000297685	ENSG00000297685	-4.58787	-4.58787	-4.58787	-3.07442	-3.59974	-3.62872	-3.58431	-3.63254	-3.44437	4.28781	-3.75844	10.5197	0.00118108	0.00963072
ENSG00000002549	LAP3	3.68822	3.71347	3.80811	3.98676	4.07485	3.946	4.48128	4.42219	4.51532	0.520648	4.10375	10.5115	0.00118636	0.00967083
ENSG00000166598	HSP90B1	7.51122	7.59783	7.53277	7.7664	7.85438	7.70551	8.28237	8.22384	8.22052	0.480631	7.88521	10.5097	0.00118752	0.0096773
ENSG00000188042	ARL4C	-1.94493	-3.03734	-2.22969	-1.59583	-1.90757	-0.85733	-0.996381	-0.765516	-0.749845	1.44993	-1.39831	10.5062	0.00118977	0.00968963
ENSG00000165775	FUNDC2	6.4814	6.4749	6.43849	7.01239	7.0099	7.08352	6.65795	6.71371	6.68002	0.405773	6.74769	10.505	0.00119052	0.00969278
ENSG00000178307	TMEM11	6.10435	6.10629	6.05626	6.68156	6.64893	6.68627	6.32876	6.27633	6.32261	0.413444	6.37733	10.491	0.00119959	0.00975764
ENSG00000015171	ZMYND11	5.16872	5.14322	5.18517	5.34252	5.3706	5.54726	6.03487	5.96528	6.01854	0.578593	5.57567	10.4843	0.00120391	0.0097837
ENSG00000153904	DDAH1	0.409947	0.219966	0.500351	1.13836	0.864568	0.806883	0.878519	0.937982	1.01982	0.57951	0.780641	10.4843	0.00120391	0.0097837
ENSG00000186017	ZNF566	1.5248	1.61824	1.43388	2.06608	1.99587	2.3299	2.00414	1.87695	1.89222	0.514722	1.8865	10.4616	0.00121881	0.00989867
ENSG00000139505	MTMR6	3.56333	3.53776	3.52592	3.79165	3.72822	3.92937	4.29114	4.36866	4.40665	0.571005	3.94584	10.4601	0.00121979	0.00990364
ENSG00000143621	ILF2	9.41696	9.40857	9.40412	9.97152	10.0341	9.98775	9.63296	9.6059	9.62069	0.411462	9.69678	10.4429	0.00123121	0.0099841
ENSG00000114353	GNAI2	6.39129	6.40048	6.42235	6.79388	6.78571	6.80348	6.6035	6.60882	6.67541	0.30977	6.61837	10.4416	0.00123205	0.00998786
ENSG00000163939	PBRM1	3.79637	3.85816	3.96696	4.14294	4.25408	4.0368	4.43883	4.43397	4.52637	0.440773	4.18332	10.4403	0.00123294	0.00999198
ENSG00000141655	TNFRSF11A	2.86473	2.81167	3.04204	3.42802	3.20218	3.04388	3.69535	3.58845	3.66815	0.549666	3.29638	10.4328	0.00123795	0.0100295
ENSG00000104689	TNFRSF10A	5.34864	5.25731	5.22792	6.02637	6.00302	5.98392	5.42065	5.55146	5.58599	0.504728	5.63383	10.4315	0.00123885	0.0100338
ENSG00000049246	PER3	-0.616197	-0.466977	-0.259575	-0.106852	0.0616625	0.214766	1.82856	1.67124	1.69349	1.61765	0.758974	10.426	0.00124253	0.0100576
ENSG00000116750	UCHL5	5.60614	5.61995	5.61018	5.81334	5.83591	5.89914	6.1018	6.08463	5.94391	0.338947	5.84653	10.416	0.00124926	0.0101087
ENSG00000089127	OAS1	3.14287	3.21526	3.0345	3.47881	3.40241	3.38754	3.66478	3.69668	3.59199	0.410356	3.41816	10.4043	0.00125722	0.0101535
ENSG00000104611	SH2D4A	6.73761	6.72978	6.70581	6.93834	7.01173	6.88265	7.35515	7.37072	7.34249	0.440866	7.03272	10.4039	0.00125747	0.0101535
ENSG00000057704	TMCC3	-1.27778	-1.63324	-2.55386	-0.987415	-0.440445	-1.0201	-0.581195	-0.864608	-0.632745	1.0894	-1.00181	10.3921	0.00126553	0.0102061
ENSG00000108946	PRKAR1A	6.81652	6.71828	6.66002	6.90507	6.90252	7.08227	7.33139	7.38056	7.33509	0.437198	7.03863	10.3914	0.00126602	0.0102069
ENSG00000186577	SMIM29	3.07727	3.12196	3.25801	3.59847	3.58313	3.61491	3.43045	3.48156	3.44986	0.375935	3.41441	10.3881	0.00126829	0.0102221
ENSG00000009307	CSDE1	9.03517	9.02005	9.03921	9.26178	9.2965	9.25887	9.9484	9.93722	9.9172	0.609559	9.46499	10.3854	0.00127019	0.0102343
ENSG00000178996	SNX18	0.286367	0.219966	0.543459	0.515991	1.03263	0.885636	1.95833	1.86153	1.94968	1.14306	1.18588	10.3845	0.00127076	0.0102358
ENSG00000116688	MFN2	8.37889	8.38479	8.36775	8.9473	8.97156	8.96081	8.58321	8.59269	8.58149	0.407868	8.66142	10.3624	0.00128604	0.01034
ENSG00000105146	AURKC	-2.53559	-2.30737	-2.55386	-0.689473	-1.52142	-0.536616	-1.77441	-1.49834	-1.5426	1.50093	-1.4799	10.3517	0.00129356	0.0103909
ENSG00000168275	COA6	4.37155	4.33898	4.26938	4.58212	4.54316	4.64225	4.80078	4.80026	4.67575	0.35075	4.56992	10.3479	0.0012962	0.010409
ENSG00000215784	FAM72D	1.00352	0.884873	0.605799	1.64473	1.34288	1.52023	1.41914	1.07798	1.53981	0.604196	1.26273	10.3418	0.0013005	0.0104371
ENSG00000176871	WSB2	6.14894	6.26106	6.25332	6.49089	6.41966	6.52864	6.50605	6.57111	6.56865	0.293118	6.42385	10.3044	0.00132714	0.0106348
ENSG00000156502	SUPV3L1	6.69996	6.64674	6.63159	6.92398	6.91725	6.91328	7.0035	6.96547	6.90339	0.278653	6.85126	10.299	0.00133105	0.0106629
ENSG00000188917	TRMT2B	5.73404	5.77065	5.83394	6.10526	6.09308	6.04138	6.03992	6.08172	6.03578	0.286575	5.97721	10.2951	0.00133385	0.0106821
ENSG00000172466	ZNF24	5.10614	5.03706	5.13233	5.25343	5.33815	5.37712	5.6831	5.70783	5.72482	0.434961	5.39616	10.2942	0.00133452	0.0106843
ENSG00000134070	IRAK2	2.00426	1.84457	1.93254	2.49409	2.03239	2.35226	3.18077	2.97288	2.84427	0.775097	2.4834	10.2929	0.00133543	0.0106869
ENSG00000065809	FAM107B	5.38675	5.45165	5.346	5.60279	5.62552	5.67692	6.20715	6.18405	6.22125	0.552436	5.78588	10.2805	0.00134443	0.0107441
ENSG00000072682	P4HA2	6.09472	6.16553	6.11326	6.48873	6.4761	6.4637	6.37053	6.34169	6.36371	0.294023	6.32722	10.2709	0.00135146	0.0107807
ENSG00000167699	GLOD4	6.66566	6.6807	6.73225	7.20004	7.18779	7.14083	6.9018	6.87454	6.93811	0.354165	6.93853	10.2602	0.00135932	0.0108336
ENSG00000110651	CD81	7.63876	7.62535	7.61338	8.28632	8.22524	8.25721	7.81371	7.86187	7.83869	0.436708	7.9311	10.2575	0.00136128	0.0108459
ENSG00000009844	VTA1	4.58983	4.51	4.60697	4.74245	4.80196	4.89159	5.07566	5.0979	5.02561	0.376414	4.83071	10.2569	0.00136176	0.0108465
ENSG00000124120	TTPAL	5.11797	5.04848	5.02995	5.3582	5.33669	5.20277	5.56199	5.62293	5.64299	0.397708	5.34268	10.2419	0.00137288	0.0109154
ENSG00000139278	GLIPR1	-3.97944	-4.58787	-3.23867	-1.16317	-2.14791	-3.05764	-2.77543	-2.20227	-2.20049	2.62442	-2.49423	10.2355	0.00137762	0.0109497
ENSG00000156804	FBXO32	0.922817	0.753738	1.04134	2.23515	2.00325	1.83797	0.988955	1.43124	1.63631	0.847112	1.51703	10.2347	0.00137824	0.0109514
ENSG00000126368	NR1D1	3.86709	3.85216	3.87503	4.07854	4.10603	4.26457	4.85907	5.02538	4.97114	0.744182	4.39948	10.2253	0.00138525	0.0110005
ENSG00000167977	KCTD5	6.24502	6.13991	6.12173	6.71292	6.69266	6.71836	6.36688	6.38041	6.41221	0.386664	6.43866	10.2183	0.00139051	0.0110257
ENSG00000176788	BASP1	8.15119	8.24224	8.18915	8.55838	8.3414	8.36267	8.65922	8.73639	8.80829	0.393774	8.46874	10.2159	0.00139237	0.0110371
ENSG00000121895	TMEM156	2.83857	2.82399	2.83208	3.19271	3.28926	3.39564	3.08455	3.10315	3.28477	0.399343	3.10843	10.2081	0.00139824	0.0110792
ENSG00000130779	CLIP1	5.78801	5.82168	5.70223	5.99705	5.9803	5.99994	6.31709	6.25178	6.23142	0.364926	6.02467	10.2077	0.00139852	0.0110792
ENSG00000064419	TNPO3	6.92746	7.02707	6.94638	7.15136	7.21246	7.16944	7.44871	7.43935	7.45446	0.351408	7.21112	10.2064	0.00139952	0.0110838
ENSG00000130741	EIF2S3	9.17828	9.1737	9.19243	9.37139	9.37951	9.40872	9.77708	9.77948	9.75801	0.410408	9.46762	10.2012	0.00140352	0.0111089
ENSG00000230533	LINC03004	-1.72091	-1.46405	-4.58787	-0.36895	-0.522829	-0.963779	-0.333198	-0.0310402	-1.17193	1.74441	-0.860965	10.1956	0.00140774	0.0111356
ENSG00000186141	POLR3C	6.18096	6.21467	6.21842	6.70495	6.67226	6.65766	6.37017	6.4358	6.44796	0.349743	6.44695	10.1893	0.00141255	0.011167
ENSG00000089041	P2RX7	-4.58787	-4.58787	-4.58787	-3.07442	-4.01081	-4.58787	-2.41241	-2.20227	-2.57963	5.16315	-3.29783	10.1865	0.00141476	0.0111811
ENSG00000099260	PALMD	3.58971	3.68451	3.64945	3.9404	4.12982	3.72823	4.7173	4.65578	4.60001	0.703881	4.14547	10.1858	0.00141527	0.0111817
ENSG00000203797	DDO	-2.73068	-2.62667	-1.54826	-1.5141	-1.43911	-1.34033	-0.259178	0.533344	0.632264	2.12965	-0.705118	10.1843	0.00141645	0.0111878
ENSG00000123131	PRDX4	8.33483	8.316	8.3239	9.02913	9.00634	8.93946	8.5111	8.53181	8.57142	0.45815	8.64588	10.1742	0.00142421	0.0112424
ENSG00000157152	SYN2	-0.0954556	0.00613244	-1.02301	0.435995	0.271753	0.854649	0.685851	1.15589	0.230071	0.982688	0.398524	10.1696	0.00142774	0.0112601
ENSG00000110315	RNF141	4.65624	4.64565	4.6171	4.85823	4.89116	4.90583	5.03211	5.10774	5.00542	0.330043	4.8677	10.16	0.00143517	0.0113052
ENSG00000205838	TTC23L	1.06498	0.406158	0.932039	1.73107	1.79797	1.97394	1.03381	1.37805	1.46296	0.783946	1.38343	10.1604	0.00143487	0.0113052
ENSG00000213698	CAPZA1P3	-1.94493	-2.04608	-1.84911	-0.405331	-0.909418	-0.665444	-1.12197	-0.0310402	-1.7711	1.37787	-1.00257	10.1562	0.0014382	0.0113258
ENSG00000122863	CHST3	7.22035	7.27643	7.24193	7.96194	7.98379	7.93171	7.40313	7.49475	7.49624	0.487103	7.58862	10.1509	0.00144232	0.0113548
ENSG00000173276	ZBTB21	3.95495	4.03977	3.70271	4.03847	4.35989	4.209	4.52383	4.4952	4.47021	0.45396	4.22361	10.1501	0.00144295	0.0113564
ENSG00000132481	TRIM47	6.21441	6.20215	6.16809	7.11871	7.03103	7.04801	6.36834	6.46319	6.46982	0.590129	6.61376	10.1489	0.00144388	0.0113603
ENSG00000115875	SRSF7	7.80503	7.79389	7.77188	8.64022	8.62819	8.69659	8.0282	8.04183	7.99883	0.583333	8.2041	10.1469	0.00144547	0.0113694
ENSG00000110958	PTGES3	8.6863	8.61954	8.64419	8.81272	8.87016	8.88245	9.15697	9.19255	9.10917	0.361781	8.90123	10.1364	0.00145373	0.0114276
ENSG00000145246	ATP10D	4.53523	4.56726	4.56444	4.74452	4.88118	4.77954	5.42416	5.39023	5.3802	0.575889	4.96338	10.1336	0.00145591	0.0114379
ENSG00000143418	CERS2	7.67263	7.67942	7.71232	8.24152	8.29199	8.25748	7.8774	7.9192	7.88729	0.402936	7.96889	10.1317	0.00145737	0.011446
ENSG00000152582	SPEF2	-3.5528	-2.62667	-3.56511	-1.36334	-2.28498	-3.05764	-0.674334	-1.08589	-1.17193	2.21805	-1.80276	10.1249	0.00146276	0.0114781
ENSG00000017797	RALBP1	5.32371	5.23212	5.41073	5.52759	5.57257	5.56412	6.0413	5.95532	5.95331	0.461499	5.6472	10.1194	0.00146714	0.0115056
ENSG00000087074	PPP1R15A	5.0794	5.03354	4.99737	5.9247	5.89957	5.92641	5.31027	5.26397	5.26702	0.597202	5.46102	10.1171	0.00146899	0.0115167
ENSG00000108094	CUL2	4.05679	3.95649	3.94903	4.17256	4.27709	4.28651	4.67545	4.58596	4.47021	0.435047	4.29173	10.1126	0.00147259	0.0115381
ENSG00000139508	SLC46A3	-4.58787	-4.58787	-4.58787	-2.35219	-3.01875	-4.58787	-1.99697	-3.63254	-3.44437	5.14246	-3.29948	10.0906	0.00149026	0.0116593
ENSG00000165061	ZMAT4	-4.58787	-4.58787	-4.58787	-3.64117	-4.58787	-4.58787	-1.99697	-0.672795	-0.877295	6.43377	-2.42936	10.0738	0.0015039	0.0117521
ENSG00000041802	LSG1	6.28108	6.34638	6.29609	6.55886	6.58491	6.47648	6.69217	6.64107	6.6633	0.296475	6.51236	10.063	0.00151276	0.0118179
ENSG00000166947	EPB42	-3.5528	-4.58787	-4.58787	-3.64117	-2.60571	-2.64959	-2.58253	-2.65541	-2.81458	2.66688	-3.11397	10.0585	0.00151645	0.0118432
ENSG00000182446	NPLOC4	8.09014	8.05289	8.03873	8.54489	8.45312	8.49752	8.27012	8.27602	8.25192	0.326561	8.2864	10.056	0.00151856	0.0118562
ENSG00000160087	UBE2J2	6.44501	6.42459	6.41184	7.09631	6.97959	6.96452	6.58038	6.66569	6.68426	0.414332	6.71607	10.0525	0.00152144	0.0118751
ENSG00000139437	TCHP	4.69806	4.79695	4.69085	4.93844	5.04832	4.99467	5.12314	5.07218	5.06514	0.312196	4.9448	10.0383	0.00153319	0.0119528
ENSG00000228427	ENSG00000228427	-4.58787	-4.58787	-4.58787	-2.85727	-3.01875	-2.83924	-3.58431	-3.63254	-4.58787	4.60685	-3.59097	10.0287	0.00154118	0.0120079
ENSG00000171428	NAT1	0.689054	0.490955	0.210544	0.79785	0.781185	1.16362	1.52767	1.64446	1.70466	0.857787	1.08539	10.0259	0.00154354	0.0120228
ENSG00000138685	FGF2	1.33824	0.975951	0.778121	1.64473	1.27135	1.53984	1.8786	1.78186	2.01395	0.666927	1.51816	10.0235	0.00154553	0.0120347
ENSG00000124214	STAU1	7.25764	7.27568	7.25211	7.43907	7.49552	7.46608	7.69027	7.68469	7.68661	0.319484	7.48248	10.0182	0.00155004	0.0120592
ENSG00000170860	LSM3	6.23293	6.19506	6.15511	6.56622	6.60202	6.56349	6.45542	6.37703	6.41986	0.305295	6.40511	10.0135	0.00155397	0.0120827
ENSG00000171530	TBCA	5.56485	5.38327	5.41871	5.84466	5.92164	5.84253	5.69246	5.65571	5.74998	0.330157	5.68576	10.003	0.00156286	0.0121339
ENSG00000184979	USP18	3.40001	3.46364	3.4795	3.78762	3.83545	3.80115	3.78991	3.71396	3.75936	0.334627	3.67895	9.98927	0.00157455	0.0122104
ENSG00000132423	COQ3	4.48692	4.32605	4.31208	4.6852	4.61475	4.65804	4.72985	4.73407	4.7758	0.323841	4.6006	9.97786	0.00158434	0.0122791
ENSG00000135679	MDM2	4.6093	4.6387	4.59422	4.87918	4.99473	4.83516	4.91209	5.01844	4.9061	0.31193	4.82918	9.97678	0.00158527	0.0122827
ENSG00000182551	ADI1	4.879	4.87692	4.79486	5.72826	5.69381	5.69617	5.14375	5.05109	5.07701	0.58127	5.26266	9.97476	0.00158701	0.0122926
ENSG00000088986	DYNLL1	8.27258	8.30552	8.31207	8.59309	8.58736	8.54546	8.54821	8.54061	8.53356	0.261443	8.47626	9.95924	0.00160044	0.0123785
ENSG00000128567	PODXL	8.7574	8.8126	8.8132	9.11096	9.1247	9.10367	9.02565	9.00573	9.01682	0.270821	8.98069	9.96028	0.00159954	0.0123785
ENSG00000138434	ITPRID2	6.03645	6.02464	6.06137	6.2239	6.31423	6.26555	6.87765	6.84593	6.8459	0.551505	6.43072	9.95924	0.00160044	0.0123785
ENSG00000139800	ZIC5	4.15369	4.09838	4.08473	4.27813	4.42451	4.44833	4.44299	4.56588	4.55905	0.344091	4.35049	9.91679	0.00163778	0.0126451
ENSG00000137574	TGS1	4.60543	4.76325	4.81589	4.94297	5.0792	4.94589	5.76243	5.61663	5.68519	0.651488	5.19553	9.91211	0.00164194	0.0126662
ENSG00000168818	STX18	4.94281	4.88673	4.94508	5.31413	5.2801	5.26375	5.1932	5.12479	5.19755	0.305714	5.13562	9.90902	0.0016447	0.0126838
ENSG00000141698	NT5C3B	5.86292	5.86303	5.91824	6.33731	6.30269	6.22977	6.07074	6.08005	6.16474	0.319806	6.10234	9.90642	0.00164703	0.0126927
ENSG00000167004	PDIA3	9.09516	9.12731	9.13304	9.30982	9.41075	9.27856	9.52667	9.47262	9.46158	0.294131	9.32119	9.90611	0.00164731	0.0126927
ENSG00000075624	ACTB	13.3425	13.3654	13.3563	14.071	14.0176	14.0725	13.537	13.562	13.5797	0.473109	13.6867	9.89673	0.00165573	0.0127279
ENSG00000147471	PLPBP	5.07006	5.13089	5.20712	5.37908	5.3447	5.4001	5.56199	5.51989	5.51082	0.318089	5.35664	9.89846	0.00165417	0.0127279
ENSG00000174840	PDE12	4.86179	4.78755	4.71933	4.91374	5.05188	5.10659	5.47994	5.47056	5.49884	0.482308	5.12909	9.89771	0.00165484	0.0127279
ENSG00000198162	MAN1A2	5.08311	4.99322	5.01183	5.26578	5.25096	5.32932	5.39294	5.36653	5.36795	0.300268	5.23665	9.89732	0.0016552	0.0127279
ENSG00000204175	GPRIN2	-2.95634	-4.58787	-2.55386	-2.09286	-1.43911	-1.85127	-1.25953	-2.33809	-0.632745	2.09569	-1.89009	9.89603	0.00165636	0.0127291
ENSG00000251017	ENSG00000251017	-2.53559	-1.46405	-1.54826	-0.987415	-0.610204	-0.758199	-0.880858	-1.21072	-0.423702	1.07406	-1.05491	9.88255	0.00166854	0.0128115
ENSG00000182022	CHST15	4.15546	4.0865	4.06637	4.45471	4.45039	4.37924	4.36321	4.45081	4.3929	0.313297	4.31896	9.86943	0.00168048	0.012892
ENSG00000143333	RGS16	-4.58787	-3.61362	-4.58787	-2.09286	-3.01875	-2.64959	-2.99816	-2.65541	-3.44437	2.74913	-3.06161	9.84681	0.00170127	0.0130439
ENSG00000078142	PIK3C3	3.94067	3.93395	3.92479	4.15079	4.21807	4.16389	4.77128	4.75404	4.76249	0.567272	4.33405	9.84087	0.00170677	0.0130747
ENSG00000286626	ENSG00000286626	-1.94493	-1.82494	-1.84911	-0.168049	-0.218244	-0.621211	-0.996381	-0.971011	-1.7711	1.31287	-0.974621	9.83479	0.00171241	0.0131103
ENSG00000110721	CHKA	4.84327	4.76112	4.8301	5.20297	5.23067	5.08755	5.05133	5.00008	5.23463	0.325791	5.03686	9.83148	0.0017155	0.0131264
ENSG00000122958	VPS26A	6.04124	5.95871	6.00994	6.18313	6.25249	6.22712	6.75603	6.67675	6.60674	0.465877	6.33019	9.82089	0.00172541	0.0131907
ENSG00000172752	COL6A5	-4.58787	-4.58787	-4.58787	-3.64117	-4.58787	-4.58787	-0.773904	-1.66698	-1.5426	6.22883	-2.58257	9.8185	0.00172765	0.0132002
ENSG00000133265	HSPBP1	6.00495	6.02952	5.98182	6.78407	6.61803	6.73892	6.18908	6.20329	6.2845	0.486228	6.34701	9.81759	0.0017285	0.0132029
ENSG00000137261	KIAA0319	2.85171	3.26727	2.97276	3.38872	3.28926	3.41701	3.71843	3.88385	4.10326	0.623446	3.48378	9.81507	0.00173088	0.0132172
ENSG00000164091	WDR82	7.53924	7.53416	7.52456	7.98628	7.92685	7.98399	7.7246	7.73778	7.7361	0.321558	7.75473	9.80596	0.00173947	0.0132721
ENSG00000164430	CGAS	4.38668	4.53018	4.46284	4.55752	4.84981	4.72917	5.27099	5.30587	5.35561	0.583904	4.87473	9.80587	0.00173956	0.0132721
ENSG00000151287	TEX30	2.70014	2.88009	2.7608	3.26105	3.02141	3.17509	3.10571	3.1952	3.19256	0.379573	3.04529	9.79813	0.0017469	0.0133165
ENSG00000135902	CHRND	2.74308	3.08151	2.67132	3.48379	3.83338	3.70236	3.09164	3.04972	3.43317	0.619861	3.2832	9.79738	0.00174761	0.0133181
ENSG00000142661	MYOM3	-2.21024	-1.38635	-0.84568	-0.520328	-0.802634	-0.758199	0.396303	0.106123	0.290629	1.33091	-0.44809	9.79446	0.00175039	0.0133342
ENSG00000116406	EDEM3	3.95697	3.94526	3.93089	4.66998	4.78707	4.67366	4.1607	4.32576	4.09055	0.533692	4.3204	9.7909	0.00175378	0.0133497
ENSG00000153006	SREK1IP1	3.23266	3.02931	3.20193	3.46628	3.36853	3.65143	3.63354	3.60706	3.4956	0.385513	3.42395	9.78704	0.00175747	0.0133701
ENSG00000188064	WNT7B	7.16462	7.13228	7.11862	8.18223	8.06613	8.09401	7.34961	7.38242	7.38997	0.653136	7.60502	9.78756	0.00175696	0.0133701
ENSG00000151414	NEK7	4.37307	4.37149	4.37905	5.18931	5.21804	5.22717	4.68836	4.6513	4.50257	0.571172	4.77869	9.78571	0.00175873	0.0133709
ENSG00000129460	NGDN	5.15466	5.18518	5.18006	5.94336	5.9496	5.81008	5.3186	5.4175	5.46311	0.500657	5.52532	9.76779	0.00177596	0.0134875
ENSG00000108773	KAT2A	7.67109	7.68885	7.65421	8.46101	8.4285	8.44429	7.88838	7.89052	7.87143	0.519854	8.03788	9.75774	0.00178569	0.0135498
ENSG00000164414	SLC35A1	1.49161	1.30354	1.36345	1.73942	2.03239	1.90756	1.82856	1.73185	1.84252	0.468948	1.71246	9.75467	0.00178868	0.0135607
ENSG00000105341	DMAC2	5.64628	5.76641	5.70934	6.43604	6.35697	6.42137	5.9161	5.88652	5.97192	0.477344	6.04307	9.74907	0.00179413	0.0135982
ENSG00000183283	DAZAP2	8.38182	8.33655	8.35901	8.78662	8.81371	8.77115	8.55086	8.58339	8.53541	0.319209	8.57966	9.73929	0.0018037	0.013659
ENSG00000286531	ENSG00000286531	-1.27778	-0.682233	-0.961443	0.515991	0.538719	0.579404	-0.188772	-0.585676	-0.524441	1.15711	-0.129853	9.72931	0.00181353	0.0137255
ENSG00000121058	COIL	5.27577	5.23366	5.32376	5.43545	5.56324	5.48665	5.93297	5.88271	5.86459	0.430542	5.57877	9.71659	0.00182612	0.013805
ENSG00000168143	FAM83B	2.83416	3.02576	2.59141	3.34831	3.26491	2.86108	3.89699	3.72038	3.82481	0.704164	3.33103	9.70749	0.00183518	0.0138656
ENSG00000286725	ENSG00000286725	-4.58787	-4.58787	-4.58787	-3.07442	-3.59974	-3.05764	-2.58253	-3.63254	-4.58787	4.61329	-3.59022	9.70408	0.00183859	0.0138834
ENSG00000082153	BZW1	6.71442	6.69669	6.6588	6.87647	6.91407	6.94856	7.57723	7.54387	7.56106	0.583035	7.10361	9.70172	0.00184095	0.0138933
ENSG00000187244	BCAM	2.97291	2.55528	2.85792	3.02513	3.20218	3.16881	3.39076	3.41973	3.29958	0.454173	3.12176	9.69677	0.00184592	0.0139268
ENSG00000046651	OFD1	4.21598	4.21046	4.18682	4.35219	4.55701	4.44183	4.62503	4.68783	4.70942	0.363591	4.4565	9.68579	0.00185699	0.0139944
ENSG00000141429	GALNT1	4.56478	4.44905	4.59933	4.69275	4.77419	4.85683	5.0685	5.19951	5.08023	0.418119	4.83045	9.66822	0.00187483	0.0141087
ENSG00000166106	ADAMTS15	3.59493	3.58916	3.4988	3.9602	4.01953	3.99122	3.94866	3.87812	3.70477	0.360992	3.81104	9.66841	0.00187464	0.0141087
ENSG00000152219	ARL14EP	3.22931	3.39103	3.47115	3.54704	3.68758	3.75993	3.84339	3.79938	3.80937	0.37777	3.62928	9.6673	0.00187577	0.0141117
ENSG00000188517	COL25A1	0.337076	0.490955	0.625994	0.890803	0.781185	1.00333	1.59906	1.37805	1.35366	0.721734	0.996456	9.65025	0.00189326	0.0142312
ENSG00000006695	COX10	5.50858	5.5426	5.51526	5.85383	6.04607	5.91753	5.74061	5.72604	5.7846	0.327242	5.74823	9.6433	0.00190044	0.014277
ENSG00000151353	TMEM18	5.38825	5.32672	5.32144	5.83446	5.96716	5.91237	5.51793	5.54423	5.62252	0.398876	5.62328	9.64377	0.00189995	0.014277
ENSG00000165983	PTER	3.12134	2.89572	2.69063	3.1526	3.20539	3.35747	3.44159	3.536	3.43317	0.449213	3.22625	9.63722	0.00190674	0.0143162
ENSG00000100528	CNIH1	6.59774	6.55032	6.55004	6.75809	6.71866	6.87012	7.01544	6.96254	6.92862	0.313364	6.78243	9.62903	0.00191526	0.0143761
ENSG00000073464	CLCN4	-3.5528	-4.58787	-2.97263	-2.66857	-3.01875	-2.33187	-1.12197	-0.585676	-1.3454	2.69935	-2.0023	9.62695	0.00191743	0.0143883
ENSG00000108854	SMURF2	4.18863	4.02385	4.12785	4.41483	4.489	4.29519	4.52383	4.45595	4.48486	0.331461	4.3437	9.62351	0.00192102	0.0144112
ENSG00000078687	TNRC6C	1.03458	0.946226	1.45661	1.25951	1.80643	1.63409	2.30183	2.26464	2.19119	0.803656	1.73597	9.62116	0.00192348	0.0144255
ENSG00000287124	ENSG00000287124	-3.5528	-4.58787	-3.56511	-3.07442	-1.70161	-3.62872	-1.77441	-1.85796	-1.01711	2.83094	-2.37456	9.61921	0.00192552	0.0144368
ENSG00000213070	HMGB3P6	-0.939257	-0.315267	-0.638772	0.165358	-0.440445	0.190153	0.463428	0.231371	0.431756	0.841582	-0.0225519	9.61796	0.00192684	0.0144425
ENSG00000105171	POP4	5.82567	5.76587	5.79712	6.38868	6.44461	6.29217	6.00044	6.05274	5.96787	0.407771	6.08042	9.61336	0.00193167	0.0144745
ENSG00000116670	MAD2L2	6.20121	6.14809	6.14071	6.87528	6.81693	6.84299	6.37308	6.341	6.3968	0.464057	6.48874	9.61284	0.00193222	0.0144745
ENSG00000145331	TRMT10A	1.65042	1.82019	1.93254	3.01827	2.80629	2.89954	2.00414	2.34445	2.05817	0.779876	2.36568	9.61234	0.00193274	0.0144745
ENSG00000187908	DMBT1	-0.274208	-0.729425	-0.73852	0.261323	-0.0870985	-0.274392	0.666989	1.0236	1.325	1.20853	0.294946	9.59991	0.00194587	0.0145563
ENSG00000117597	UTP25	5.01077	5.01576	5.1092	5.30149	5.40999	5.16695	5.4561	5.44233	5.4474	0.328637	5.27299	9.59311	0.00195309	0.0145938
ENSG00000173545	ZNF622	6.63083	6.69306	6.60003	6.97374	6.95745	6.94351	6.90482	6.83685	6.88048	0.275188	6.83093	9.59383	0.00195232	0.0145938
ENSG00000306108	ENSG00000306108	-4.58787	-4.58787	-4.58787	-3.07442	-4.58787	-3.05764	-3.58431	-2.84476	-3.44437	4.54326	-3.6302	9.59358	0.00195259	0.0145938
ENSG00000179119	SPTY2D1	3.20903	3.07809	3.12951	3.44088	3.51509	3.25736	3.86217	3.90469	3.80159	0.511554	3.49878	9.59104	0.00195529	0.0146061
ENSG00000165055	METTL2B	5.80837	5.83947	5.74325	6.0935	6.14903	6.0114	6.12055	6.02964	6.07451	0.2831	5.99228	9.59037	0.00195601	0.0146074
ENSG00000309789	ENSG00000309789	-2.95634	-3.61362	-3.56511	-2.35219	-2.60571	-1.49139	-2.41241	-1.66698	-2.04273	1.79901	-2.35053	9.58767	0.00195888	0.0146247
ENSG00000115844	DLX2	5.10705	5.02734	5.20293	5.40557	5.40024	5.34264	5.38214	5.50817	5.4474	0.301463	5.32176	9.58546	0.00196124	0.0146382
ENSG00000298382	ENSG00000298382	-1.94493	-2.30737	-2.97263	-0.881116	-1.02474	-0.621211	-1.12197	-2.33809	-1.01711	1.46235	-1.39263	9.57528	0.00197215	0.0147074
ENSG00000153574	RPIA	4.57142	4.45302	4.45581	5.02472	5.09223	5.0547	4.66598	4.74881	4.7396	0.404518	4.77577	9.56325	0.00198511	0.0147955
ENSG00000185565	LSAMP	1.57847	1.78704	1.57561	1.96282	2.02516	1.95945	2.47989	2.54599	2.27601	0.582735	2.06031	9.56213	0.00198633	0.0148003
ENSG00000231528	FAM225A	-2.53559	-3.03734	-2.22969	-2.35219	-0.802634	-0.665444	-0.880858	-0.971011	-2.04273	1.66767	-1.47783	9.55926	0.00198943	0.0148193
ENSG00000133657	ATP13A3	6.18875	6.16996	6.12882	6.3493	6.41102	6.42071	6.55431	6.61803	6.42915	0.304177	6.37235	9.5527	0.00199656	0.014864
ENSG00000187627	RGPD1	-4.58787	-4.58787	-4.58787	-3.64117	-3.59974	-2.1959	-4.58787	-3.06278	-2.57963	4.92472	-3.43581	9.54807	0.0020016	0.0148931
ENSG00000134278	SPIRE1	4.11607	4.1979	4.1936	4.43555	4.42863	4.35868	4.59166	4.61843	4.69968	0.357552	4.41745	9.5373	0.00201338	0.0149724
ENSG00000073921	PICALM	6.47716	6.45492	6.50883	6.71345	6.72788	6.71243	7.5747	7.60664	7.51262	0.722602	6.99973	9.53138	0.00201988	0.0150099
ENSG00000144231	POLR2D	6.72547	6.64587	6.67252	6.96241	6.96573	6.92894	6.9791	6.9338	6.90823	0.265063	6.86357	9.51981	0.00203266	0.0150818
ENSG00000287919	ENSG00000287919	-4.58787	-4.58787	-4.58787	-2.66857	-3.59974	-2.07165	-3.26167	-4.58787	-3.44437	4.95588	-3.40263	9.50614	0.00204786	0.0151861
ENSG00000153339	TRAPPC8	3.87997	3.93584	3.87503	4.10949	4.34254	4.20132	4.3034	4.14015	4.28169	0.335341	4.12895	9.49515	0.00206016	0.015273
ENSG00000163798	SLC4A1AP	4.30305	4.23372	4.26295	4.42652	4.55073	4.52537	5.12055	5.06041	4.95603	0.533991	4.64316	9.49091	0.00206492	0.0152997
ENSG00000119280	C1orf198	4.8234	4.80732	4.91462	6.11974	6.04563	5.96682	5.05948	5.14722	5.10889	0.802505	5.42998	9.4837	0.00207306	0.0153514
ENSG00000156603	MED19	4.77939	4.62352	4.7016	5.215	5.19648	5.318	4.88276	5.00183	4.90125	0.393537	4.97624	9.48194	0.00207505	0.0153619
ENSG00000164171	ITGA2	3.86061	4.02918	3.96894	4.16482	4.31019	4.21816	5.39509	5.30016	5.18165	0.906202	4.61545	9.46983	0.00208879	0.0154549
ENSG00000185019	UBOX5	-3.97944	-3.61362	-2.55386	-1.5141	-3.2802	-1.85127	-1.67481	-1.27743	-1.25606	2.04737	-2.0432	9.4691	0.00208962	0.0154568
ENSG00000127528	KLF2	-1.72091	-0.935334	-0.73852	0.628238	-0.400953	0.419203	-0.451874	-0.00254436	-0.524441	1.15874	-0.252172	9.46517	0.0020941	0.0154855
ENSG00000111328	CDK2AP1	7.04603	6.99431	6.9509	7.42343	7.32861	7.55295	7.20204	7.19963	7.2356	0.332183	7.22724	9.46353	0.00209598	0.0154951
ENSG00000198015	MRPL42	4.32677	4.32605	4.42156	4.8839	4.62554	4.77334	4.7081	4.53584	4.66293	0.344499	4.59688	9.46254	0.0020971	0.0154991
ENSG00000146005	PSD2	-1.52705	-3.03734	-1.74171	-0.442654	-0.288576	-0.1435	-1.99697	-0.864608	-0.524441	1.52512	-0.927659	9.45118	0.00211013	0.0155823
ENSG00000151327	FAM177A1	4.27569	4.37009	4.26778	4.52648	4.52276	4.54127	4.96517	4.89608	4.84179	0.423019	4.60026	9.45149	0.00210978	0.0155823
ENSG00000108798	ABI3	-4.58787	-4.58787	-4.58787	-3.64117	-4.58787	-3.31511	-2.77543	-3.31971	-2.04273	4.90975	-3.46839	9.44103	0.00212185	0.0156645
ENSG00000139977	NAA30	3.25261	3.33192	3.26124	3.47881	3.43005	3.74734	4.2104	3.9798	4.12005	0.57734	3.69032	9.43865	0.0021246	0.0156769
ENSG00000164944	VIRMA	5.58597	5.60457	5.49412	5.76914	5.79611	5.80907	6.5829	6.50007	6.46449	0.637139	6.01636	9.43828	0.00212503	0.0156769
ENSG00000155592	ZKSCAN2	2.62561	2.7951	2.89168	3.14633	3.1265	3.11425	3.1127	3.12913	3.20442	0.36538	3.02769	9.43375	0.00213028	0.0157092
ENSG00000112081	SRSF3	8.72177	8.69248	8.6963	8.98116	8.99285	9.08193	8.9379	8.90304	8.92318	0.267692	8.88741	9.42761	0.00213743	0.0157575
ENSG00000103855	CD276	8.09475	8.09752	8.10611	8.5369	8.50139	8.48533	8.25717	8.33504	8.29193	0.306087	8.31052	9.42087	0.0021453	0.0158111
ENSG00000150459	SAP18	6.7743	6.86152	6.88826	7.43103	7.43321	7.46014	7.07701	7.04334	7.00063	0.412997	7.1301	9.41825	0.00214837	0.0158293
ENSG00000075089	ACTR6	-2.21024	-1.93128	-2.09137	-1.22686	-1.6087	-1.07871	-0.451874	-1.21072	-0.945507	1.15961	-1.3143	9.41641	0.00215052	0.0158408
ENSG00000117751	PPP1R8	4.7017	4.60936	4.55657	4.9945	4.97329	4.9376	4.82969	4.9008	4.92174	0.304034	4.83305	9.41437	0.00215291	0.015854
ENSG00000234185	ENSG00000234185	3.26576	3.32904	3.13657	3.45871	3.52793	3.56314	3.84968	3.80342	3.66529	0.4068	3.52881	9.40162	0.00216794	0.0159514
ENSG00000101844	ATG4A	3.37596	3.32616	3.52592	3.5683	3.88222	3.59395	4.03578	4.00809	4.06477	0.46193	3.73463	9.39854	0.00217159	0.0159692
ENSG00000114316	USP4	5.29594	5.37423	5.3551	5.66607	5.70911	5.61297	5.55815	5.63772	5.57842	0.286152	5.53889	9.39575	0.00217489	0.0159758
ENSG00000162413	KLHL21	6.5404	6.51342	6.5759	7.15019	7.05497	7.13782	6.7392	6.74004	6.743	0.396733	6.81955	9.39683	0.0021736	0.0159758
ENSG00000196387	ZNF140	0.0933756	-0.389129	0.263071	0.394269	0.973758	0.854649	0.463428	0.590579	0.908289	0.723152	0.514663	9.39598	0.00217462	0.0159758
ENSG00000185352	HS6ST3	0.608779	0.719003	0.156033	0.749027	1.27135	0.870226	1.50661	1.8922	1.93078	0.942143	1.1887	9.39492	0.00217588	0.0159786
ENSG00000185909	KLHDC8B	2.99281	2.9303	3.01931	3.36191	3.41629	3.45882	3.27097	3.32173	3.20048	0.36245	3.23112	9.38968	0.00218211	0.0160199
ENSG00000112996	MRPS30	6.46403	6.443	6.53377	6.62575	6.71108	6.73361	7.23463	7.27849	7.2722	0.523782	6.85004	9.38091	0.00219257	0.0160878
ENSG00000169813	HNRNPF	9.16574	9.14562	9.10689	9.35475	9.32065	9.37504	9.46257	9.46048	9.44866	0.265162	9.32169	9.38111	0.00219233	0.0160878
ENSG00000109475	RPL34	7.04198	7.0166	6.95489	7.48746	7.42035	7.51552	7.15734	7.19329	7.25971	0.341079	7.24097	9.37511	0.00219952	0.0161317
ENSG00000176473	WDR25	4.93151	4.93198	4.82793	5.65286	5.51631	5.57664	5.08812	5.12479	5.12769	0.470158	5.22739	9.37328	0.00220171	0.0161369
ENSG00000256356	HSPA8P5	-1.72091	-1.31263	-1.96516	-0.520328	-0.610204	-1.49139	-0.581195	-0.585676	0.0665253	1.1754	-0.844382	9.37044	0.00220512	0.0161575
ENSG00000138592	USP8	4.32991	4.42769	4.38943	4.55752	4.74918	4.55217	5.08013	4.87607	4.98036	0.430312	4.68322	9.35988	0.00221786	0.0162373
ENSG00000008086	CDKL5	4.15015	4.15144	4.0719	4.38851	4.51504	4.36831	4.34256	4.57181	4.51848	0.328861	4.35201	9.34207	0.00223953	0.0163732
ENSG00000117000	RLF	3.48117	3.28519	3.48504	3.91296	3.88821	4.04368	3.6189	3.7289	3.70199	0.405263	3.70114	9.34143	0.00224031	0.0163744
ENSG00000144736	SHQ1	5.25284	5.20571	5.31602	5.49465	5.45441	5.58315	5.5639	5.61203	5.5769	0.289934	5.4583	9.33212	0.00225172	0.0164397
ENSG00000187775	DNAH17	4.59765	4.7461	4.75071	4.97959	5.04207	4.88202	5.03211	5.04001	5.05754	0.306996	4.91155	9.33259	0.00225114	0.0164397
ENSG00000100029	PES1	8.62775	8.626	8.62409	9.5177	9.45959	9.51365	8.84761	8.81735	8.84022	0.577939	9.03569	9.33035	0.00225389	0.0164464
ENSG00000126070	AGO3	4.08117	4.13507	4.1437	4.34263	4.40515	4.4804	4.54336	4.34391	4.54669	0.326041	4.34541	9.33043	0.00225379	0.0164464
ENSG00000135828	RNASEL	-1.35618	-2.30737	-1.96516	-0.689473	-1.02474	-1.66014	-0.259178	-0.281867	-0.524441	1.2815	-0.962023	9.31973	0.002267	0.0165031
ENSG00000282849	ENSG00000282849	-2.07149	-2.81744	-2.09137	-1.04365	-1.02474	-1.49139	-1.41162	-0.718411	-1.90053	1.26032	-1.47873	9.3195	0.00226727	0.0165031
ENSG00000131323	TRAF3	5.2245	5.16918	5.18006	5.47101	5.4638	5.40613	5.46022	5.54	5.49161	0.281517	5.38489	9.31659	0.00227089	0.0165158
ENSG00000147457	CHMP7	6.47999	6.48237	6.47861	7.20269	7.26155	7.14844	6.64987	6.73582	6.66294	0.487567	6.82281	9.31351	0.00227471	0.0165344
ENSG00000145780	FEM1C	3.61047	3.76546	3.69078	3.92216	3.79776	4.11079	4.32312	4.44952	4.31487	0.481893	4.02804	9.31085	0.002278	0.0165539
ENSG00000171497	PPID	4.61958	4.55008	4.68605	4.86779	4.90008	4.7816	5.13434	5.32497	5.12041	0.414668	4.90846	9.30925	0.00227999	0.0165638
ENSG00000163964	PIGX	4.10148	3.94901	4.03462	4.29524	4.17951	4.33502	4.93986	4.91953	4.7824	0.580189	4.44024	9.30798	0.00228158	0.0165707
ENSG00000152147	GEMIN6	5.14668	5.08984	5.26381	5.59014	5.59289	5.64615	5.39581	5.3713	5.39665	0.335233	5.40015	9.30237	0.00228858	0.0166124
ENSG00000122884	P4HA1	5.08682	5.15464	5.15596	5.35277	5.29446	5.43653	6.08857	5.99517	6.14386	0.631133	5.58215	9.2973	0.00229492	0.0166502
ENSG00000140471	LINS1	3.09579	3.09512	2.8749	3.30393	3.36567	3.56792	3.34403	3.37428	3.41968	0.374125	3.28463	9.2967	0.00229567	0.0166502
ENSG00000164167	LSM6	4.12151	3.98235	4.02704	4.46985	4.49686	4.58912	4.37052	4.24637	4.2439	0.365086	4.29733	9.29242	0.00230104	0.0166709
ENSG00000147044	CASK	3.42952	3.23383	3.44581	3.60306	3.6434	3.63784	3.92305	4.0529	4.13664	0.476891	3.70643	9.27943	0.00231742	0.016785
ENSG00000071082	RPL31	8.72549	8.69423	8.71565	9.15354	9.15498	9.23015	8.90206	8.89738	8.89679	0.334424	8.94315	9.27368	0.00232471	0.0168193
ENSG00000154229	PRKCA	6.50481	6.4723	6.54872	6.70415	6.71754	6.69777	6.9146	7.0057	6.94725	0.327933	6.73557	9.27399	0.00232431	0.0168193
ENSG00000143256	PFDN2	6.12344	6.03835	6.06368	6.66685	6.65011	6.64187	6.3152	6.26319	6.23816	0.400037	6.35402	9.27217	0.00232662	0.0168285
ENSG00000163902	RPN1	8.64153	8.63956	8.62126	9.16342	9.16077	9.11816	8.81277	8.79069	8.85745	0.359236	8.88326	9.26895	0.00233071	0.0168535
ENSG00000105245	NUMBL	5.28064	5.42293	5.38726	6.05007	6.03172	5.99551	5.54595	5.60973	5.55855	0.452288	5.68132	9.25951	0.00234275	0.0169267
ENSG00000185247	MAGEA11	-0.0622171	-0.0526732	-0.545477	-0.106852	0.518265	0.540991	1.7942	0.937982	1.46296	1.23176	0.68679	9.24678	0.0023591	0.0170355
ENSG00000071054	MAP4K4	7.20528	7.18095	7.10362	7.3632	7.44358	7.27653	7.64536	7.6654	7.63846	0.34946	7.40602	9.23135	0.00237906	0.0171655
ENSG00000107679	PLEKHA1	4.68589	4.57578	4.57097	4.69275	4.84366	5.01671	5.17746	5.08385	5.18465	0.399007	4.88941	9.22251	0.00239057	0.0172205
ENSG00000113368	LMNB1	7.1666	7.19544	7.14729	7.34484	7.41327	7.31971	7.67236	7.69397	7.67565	0.359257	7.41904	9.22002	0.00239383	0.0172346
ENSG00000130950	NUTM2F	-4.58787	-4.58787	-3.56511	-3.07442	-2.60571	-1.66014	-2.58253	-3.63254	-2.57963	2.96044	-2.92565	9.20891	0.0024084	0.01733
ENSG00000100216	TOMM22	7.79132	7.74725	7.70255	8.47593	8.41698	8.54849	7.96337	7.9324	7.94392	0.491311	8.09282	9.20456	0.00241413	0.0173665
ENSG00000163389	POGLUT1	4.46429	4.25357	4.423	4.72887	4.78386	4.76607	4.68836	4.66136	4.58043	0.321185	4.60423	9.19579	0.00242572	0.0174404
ENSG00000146410	MTFR2	3.26248	3.1613	3.49606	3.60763	3.5432	3.60563	4.00043	3.80946	3.96146	0.453468	3.6299	9.18102	0.00244538	0.0175436
ENSG00000104892	KLC3	-1.72091	-2.04608	-1.08731	0.189955	-0.288576	-0.496109	-1.33357	-0.628578	-0.577577	1.21311	-0.730466	9.17669	0.00245117	0.0175754
ENSG00000196352	CD55	9.52672	9.54376	9.52809	9.71716	9.7452	9.71507	9.91188	9.88632	9.87688	0.278327	9.72426	9.17147	0.00245817	0.0176115
ENSG00000182831	HAPSTR1	5.31583	5.36724	5.31524	5.49218	5.54187	5.57723	5.85804	5.77264	5.84516	0.355852	5.5796	9.17087	0.00245898	0.0176125
ENSG00000130433	CACNG6	-1.94493	-1.46405	-1.37772	-0.881116	-1.02474	-1.66014	1.34987	0.995622	1.20427	2.15846	0.0159797	9.15841	0.00247578	0.0177184
ENSG00000113851	CRBN	2.82974	3.00428	2.9767	3.30675	3.5905	3.30112	3.36466	3.23464	3.18461	0.399396	3.21601	9.15609	0.00247892	0.0177361
ENSG00000004897	CDC27	5.86346	5.90709	5.81867	6.03318	6.10556	6.07159	6.6831	6.67785	6.67435	0.542863	6.24689	9.15347	0.00248246	0.0177566
ENSG00000149269	PAK1	5.50373	5.57088	5.51322	5.6889	5.79823	5.75136	5.88532	6.04465	5.93386	0.325795	5.75467	9.15241	0.00248391	0.0177622
ENSG00000196557	CACNA1H	-1.72091	-0.881037	-0.791106	-1.04365	-0.288576	-0.344579	1.07732	1.32282	0.849117	1.65848	0.136569	9.14974	0.00248753	0.0177785
ENSG00000154127	UBASH3B	0.409947	0.531555	1.18439	1.23608	1.31943	1.42851	1.70456	1.30013	1.2809	0.649967	1.20498	9.14767	0.00249035	0.017789
ENSG00000258657	ENSG00000258657	-4.58787	-4.58787	-4.58787	-3.64117	-3.59974	-4.58787	-2.58253	-3.06278	-2.81458	4.66143	-3.58637	9.1441	0.00249522	0.0178141
ENSG00000196924	FLNA	12.3477	12.3681	12.3698	13.1367	13.0739	13.0788	12.5206	12.5743	12.5623	0.488285	12.7051	9.14132	0.00249901	0.0178316
ENSG00000107984	DKK1	3.84097	3.83199	3.94502	4.29098	4.01224	4.11079	4.27254	4.35634	4.32214	0.359788	4.12257	9.13395	0.0025091	0.0178843
ENSG00000105287	PRKD2	5.00097	4.95362	5.00703	5.64232	5.58553	5.59667	5.12401	5.22006	5.22981	0.428527	5.28635	9.1301	0.00251438	0.017917
ENSG00000224259	LINC01133	1.78435	1.70954	1.86617	1.91198	2.31923	2.0715	3.32911	3.53357	3.25088	1.09808	2.59571	9.12816	0.00251705	0.0179312
ENSG00000136603	SKIL	4.06997	4.10175	3.82786	4.4458	4.37703	4.68911	4.21365	4.35634	4.30021	0.401084	4.28376	9.12629	0.00251962	0.0179447
ENSG00000106348	IMPDH1	7.87869	7.88875	7.90632	8.61056	8.52793	8.61182	8.05904	8.0976	8.09097	0.463775	8.21636	9.12425	0.00252243	0.0179537
ENSG00000164022	AIMP1	4.77824	4.70897	4.88036	5.05517	5.11454	5.13588	5.06039	5.11751	5.02003	0.294305	4.99318	9.12226	0.00252518	0.017965
ENSG00000100503	NIN	4.19723	4.10007	4.26295	4.47611	4.52917	4.47659	4.56389	4.42351	4.49294	0.306809	4.39938	9.10589	0.00254787	0.0181118
ENSG00000187109	NAP1L1	8.30688	8.29681	8.27708	8.42859	8.54493	8.47899	8.70487	8.7287	8.68796	0.306761	8.50521	9.10433	0.00255005	0.0181182
ENSG00000100462	PRMT5	5.85479	5.8867	5.90487	6.78432	6.81037	6.7961	6.12185	6.06919	6.0863	0.605522	6.31256	9.10089	0.00255485	0.0181419
ENSG00000029363	BCLAF1	5.60484	5.72762	5.71171	5.93337	6.03081	5.89296	6.02842	5.91621	5.97941	0.282159	5.87647	9.0934	0.00256534	0.0182115
ENSG00000146576	INTS15	4.66867	4.74178	4.80153	5.56333	5.55887	5.50735	5.01543	4.92603	4.91695	0.540964	5.1201	9.08597	0.00257578	0.0182807
ENSG00000153233	PTPRR	2.74778	2.62729	2.58111	3.39402	3.24015	3.37122	2.90302	2.88791	2.95131	0.49084	2.99681	9.07504	0.00259122	0.0183805
ENSG00000089022	MAPKAPK5	5.63998	5.63342	5.59426	5.99356	6.04831	5.91049	5.86011	5.83959	5.82867	0.29344	5.8246	9.06636	0.00260355	0.0184629
ENSG00000020426	MNAT1	2.69529	2.83619	2.84074	3.02513	3.19576	3.04731	3.31404	3.22864	3.18061	0.37759	3.05382	9.04628	0.0026323	0.0186368
ENSG00000111711	GOLT1B	5.05688	4.76005	4.79931	5.01615	5.16476	5.34612	5.32613	5.32145	5.20936	0.357694	5.12579	9.04505	0.00263407	0.0186444
ENSG00000143337	TOR1AIP1	5.83121	5.84452	5.84206	5.96979	6.06779	6.06103	6.35662	6.42042	6.3738	0.380114	6.10336	9.04298	0.00263705	0.0186605
ENSG00000114767	RRP9	6.07758	6.11716	6.093	6.94287	6.88516	7.00786	6.27255	6.31435	6.31852	0.564082	6.49525	9.04167	0.00263895	0.018668
ENSG00000134602	STK26	5.91601	6.04099	5.98719	6.07752	6.17947	6.2983	6.58666	6.5445	6.55637	0.405143	6.26454	9.04024	0.00264101	0.0186685
ENSG00000113282	CLINT1	6.31665	6.28426	6.22049	6.44053	6.45776	6.50295	6.95063	6.87598	6.91846	0.434372	6.57784	9.02482	0.00266338	0.0188115
ENSG00000104221	BRF2	4.20578	4.07968	3.96498	4.78242	4.71701	4.82321	4.26158	4.38088	4.30021	0.477849	4.42157	9.02384	0.00266482	0.0188167
ENSG00000013588	GPRC5A	8.83595	8.87155	8.90141	9.10065	9.1459	9.07659	9.11099	9.17565	9.11173	0.250746	9.04178	9.02287	0.00266623	0.0188216
ENSG00000148154	UGCG	3.9075	3.8681	3.78584	3.99899	3.99384	4.2923	4.48263	4.53826	4.47511	0.460027	4.17639	9.01612	0.00267609	0.0188811
ENSG00000100632	ERH	7.10803	7.12898	7.09821	7.39148	7.331	7.53504	7.31917	7.35153	7.37694	0.274309	7.30029	9.01014	0.00268485	0.0189379
ENSG00000169410	PTPN9	5.9956	6.03306	6.02238	6.29896	6.36165	6.28165	6.26709	6.22001	6.27	0.266889	6.20031	9.00527	0.00269203	0.0189784
ENSG00000153560	UBP1	4.98118	5.201	5.09659	5.3432	5.31016	5.27403	5.59791	5.59407	5.58221	0.361576	5.34649	8.99512	0.00270701	0.0190688
ENSG00000135272	MDFIC	4.02041	4.00775	3.8213	4.13979	4.2244	4.4142	4.26472	4.33835	4.36149	0.341166	4.18847	8.98485	0.00272228	0.0191693
ENSG00000266412	NCOA4	7.74747	7.7948	7.7512	7.9549	7.98321	7.93519	8.55776	8.54605	8.52087	0.514488	8.1271	8.98316	0.00272479	0.0191787
ENSG00000074319	TSG101	5.54678	5.51945	5.52066	5.80192	5.89263	5.81008	5.8497	5.72923	5.7466	0.277398	5.71956	8.96697	0.00274904	0.0193186
ENSG00000223559	ENSG00000223559	2.71939	2.91503	2.98845	3.05221	3.22129	3.19688	3.35291	3.4991	3.45649	0.426978	3.17598	8.96257	0.00275567	0.0193497
ENSG00000230667	SETSIP	0.649474	0.64692	0.94817	1.34959	1.34288	1.12519	1.00406	1.38885	1.56455	0.560866	1.14425	8.94044	0.00278925	0.0195699
ENSG00000124209	RAB22A	5.06348	5.12592	5.09387	5.31413	5.32643	5.41013	5.39079	5.42342	5.36356	0.277574	5.28536	8.93656	0.00279519	0.0196064
ENSG00000081177	EXD2	3.27879	3.05042	3.0681	3.5636	3.7371	3.48435	3.34106	3.52869	3.44654	0.388128	3.40472	8.93553	0.00279676	0.019607
ENSG00000176014	TUBB6	8.5937	8.55462	8.59733	9.27666	9.18834	9.24199	8.74743	8.7689	8.78134	0.43816	8.88834	8.93598	0.00279608	0.019607
ENSG00000267745	ENSG00000267745	-4.58787	-3.61362	-2.97263	-2.21671	-2.28498	-1.27035	-1.12197	-3.63254	-1.44063	2.48788	-2.18534	8.9158	0.00282715	0.0197676
ENSG00000206527	HACD2	5.87798	5.90757	5.97937	6.1305	6.09221	6.18765	6.26277	6.38244	6.25726	0.29987	6.12884	8.88224	0.00287958	0.0201076
ENSG00000040487	SLC66A1	4.00872	3.99147	4.07924	4.30653	4.37986	4.53273	4.25212	4.35496	4.27421	0.327268	4.25251	8.86826	0.00290171	0.0202462
ENSG00000198176	TFDP1	8.29008	8.29155	8.26032	8.55824	8.59767	8.59522	8.48079	8.47982	8.50309	0.255996	8.45631	8.8676	0.00290276	0.0202481
ENSG00000151233	GXYLT1	3.37596	3.49734	3.59157	3.77751	3.8641	3.83131	3.87661	3.84518	3.72136	0.330673	3.71888	8.86504	0.00290684	0.0202615
ENSG00000078369	GNB1	5.65505	5.57756	5.67037	5.88005	5.78759	5.94446	5.94476	5.93106	6.03135	0.286963	5.8323	8.86036	0.0029143	0.0203019
ENSG00000152683	SLC30A6	5.21097	5.3489	5.21714	5.38241	5.47246	5.54302	6.00936	6.04891	5.94391	0.498782	5.61106	8.84769	0.0029346	0.0204271
ENSG00000152348	ATG10	3.20221	3.39928	3.14359	3.45617	3.50732	3.54141	4.05767	3.85689	3.9568	0.496887	3.60118	8.84358	0.00294121	0.0204677
ENSG00000092820	EZR	8.93592	8.92782	8.94288	9.7295	9.77008	9.71119	9.14632	9.12696	9.10186	0.527852	9.30795	8.84241	0.0029431	0.0204701
ENSG00000166068	SPRED1	3.81884	3.83807	3.77232	4.01285	3.94103	4.15914	4.48532	4.34252	4.46693	0.440444	4.11746	8.83864	0.00294919	0.0205071
ENSG00000020256	ZFP64	5.11161	5.2275	5.25411	5.62607	5.69779	5.5914	5.36102	5.44557	5.4231	0.330656	5.42744	8.83556	0.00295417	0.0205363
ENSG00000141384	TAF4B	3.38804	3.20588	3.09733	3.49123	3.43551	3.52182	3.88887	3.82346	3.90931	0.457531	3.55484	8.83001	0.00296317	0.0205826
ENSG00000065883	CDK13	5.47005	5.45495	5.51863	5.67372	5.72594	5.64105	6.03441	5.96031	5.90146	0.349284	5.72331	8.826	0.00296968	0.020617
ENSG00000100403	ZC3H7B	7.87575	7.83337	7.86403	8.21087	8.17814	8.15986	8.05077	8.05831	8.06547	0.264254	8.03921	8.82252	0.00297536	0.020651
ENSG00000114315	HES1	2.50328	2.38847	2.53379	2.70504	2.61727	3.037	2.9738	3.05651	3.08554	0.449415	2.78911	8.81991	0.00297962	0.0206751
ENSG00000169439	SDC2	3.59232	3.78238	3.55781	3.94402	3.78068	3.91817	4.49204	4.39031	4.44878	0.543779	4.03099	8.81396	0.00298934	0.0207263
ENSG00000008952	SEC62	4.76325	4.65945	4.57617	4.8716	4.87516	5.03324	5.14546	4.92974	5.18065	0.343036	4.90565	8.80749	0.00299997	0.0207837
ENSG00000237842	SMU1P1	1.89002	2.23098	2.3149	2.44384	2.70133	2.66961	2.41919	2.69696	2.63249	0.444433	2.46597	8.79704	0.0030172	0.0208921
ENSG00000114745	GORASP1	5.97824	5.95031	5.89138	6.31966	6.33448	6.34015	6.14844	6.14039	6.12475	0.297812	6.14546	8.7859	0.00303568	0.0209965
ENSG00000100523	DDHD1	3.43244	3.37159	3.45431	3.66578	3.67608	3.73675	3.81154	4.03755	3.75399	0.367535	3.67401	8.78346	0.00303975	0.0210152
ENSG00000103876	FAH	5.58989	5.61759	5.59554	5.86581	5.78599	5.93847	5.85387	5.93981	5.84957	0.27245	5.78813	8.77944	0.00304644	0.0210559
ENSG00000186283	TOR3A	7.072	6.99067	7.03117	7.63093	7.63237	7.62674	7.20245	7.17001	7.26773	0.405447	7.31411	8.77235	0.00305832	0.021127
ENSG00000298300	ENSG00000298300	-4.58787	-4.58787	-4.58787	-3.64117	-4.58787	-3.31511	-2.58253	-3.63254	-2.81458	4.58224	-3.62709	8.77171	0.00305938	0.0211288
ENSG00000163714	U2SURP	6.27621	6.26633	6.35513	6.51847	6.57039	6.53506	6.59915	6.60709	6.5311	0.261007	6.47881	8.76865	0.00306452	0.0211588
ENSG00000111581	NUP107	5.93722	5.87343	5.92233	6.14394	6.14236	6.02929	6.65047	6.62689	6.71703	0.501547	6.26398	8.76328	0.00307356	0.0212117
ENSG00000236915	CLCA4-AS1	-1.94493	-2.04608	-2.22969	-1.36334	-1.6087	-0.665444	-1.25953	-0.503519	-1.17193	1.16833	-1.30276	8.75743	0.00308343	0.02127
ENSG00000138166	DUSP5	3.83437	3.78238	3.64203	4.3671	4.35268	4.43791	3.92305	3.99578	4.01404	0.443074	4.06432	8.75632	0.00308531	0.0212745
ENSG00000232952	ENSG00000232952	1.32574	1.42704	0.813772	1.62683	1.45474	1.80592	2.03389	1.92224	1.81185	0.581971	1.62088	8.75521	0.00308719	0.021282
ENSG00000137720	CFAP68	2.1101	2.34357	2.15036	2.66612	2.4219	2.40133	2.96611	2.99778	2.79286	0.524596	2.57295	8.75255	0.0030917	0.0213075
ENSG00000214941	ZSWIM7	3.92832	4.05378	3.81032	4.31633	4.13654	4.32799	4.19567	4.33137	4.25913	0.329386	4.16165	8.74987	0.00309625	0.0213275
ENSG00000135597	REPS1	4.50921	4.59387	4.52868	4.77024	4.75684	4.78365	4.85491	4.98681	5.00542	0.318853	4.76451	8.73686	0.0031184	0.0214636
ENSG00000188612	SUMO2	6.32728	6.31147	6.34336	6.58431	6.59471	6.55869	6.5923	6.60391	6.54864	0.2533	6.50103	8.72218	0.00314362	0.0216065
ENSG00000135924	DNAJB2	5.05688	5.00498	4.98472	5.85528	5.90893	5.8982	5.28188	5.12882	5.24805	0.577431	5.42489	8.71549	0.00315518	0.0216716
ENSG00000130821	SLC6A8	3.44694	3.3855	3.19856	4.04859	4.11627	4.18584	3.55365	3.59779	3.59199	0.529261	3.71984	8.71065	0.00316356	0.0217179
ENSG00000165102	HGSNAT	6.93365	6.95916	6.98574	7.23684	7.35535	7.30725	7.13306	7.20135	7.15925	0.274786	7.14848	8.70463	0.00317403	0.0217744
ENSG00000126903	SLC10A3	6.31823	6.33353	6.30159	6.98827	6.87966	6.97312	6.41324	6.51647	6.58952	0.427114	6.61601	8.69772	0.00318609	0.0218385
ENSG00000145757	SPATA9	-4.58787	-4.02002	-4.58787	-3.33014	-3.2802	-3.31511	-3.58431	-2.65541	-3.09538	2.89323	-3.47335	8.69611	0.0031889	0.0218464
ENSG00000196465	MYL6B	-3.97944	-4.58787	-3.98769	-3.33014	-2.7975	-3.05764	-2.77543	-2.65541	-3.44437	2.40758	-3.26731	8.68595	0.00320673	0.0219572
ENSG00000138709	LARP1B	3.64861	3.68	3.58643	3.87364	4.05369	3.93678	3.89293	3.93078	4.07341	0.323527	3.86217	8.67479	0.00322642	0.0220578
ENSG00000289427	ENSG00000289427	-4.58787	-4.02002	-4.58787	-3.64117	-3.01875	-3.62872	-2.77543	-3.06278	-3.09538	2.89809	-3.47231	8.66897	0.00323674	0.0221169
ENSG00000158042	MRPL17	7.65743	7.63163	7.64588	7.93798	7.91039	7.92252	7.8662	7.85896	7.85805	0.247764	7.81479	8.66602	0.00324199	0.0221413
ENSG00000112658	SRF	6.71772	6.67278	6.7542	7.85173	7.79424	7.78393	6.90508	6.89528	6.96246	0.718159	7.23124	8.66456	0.00324457	0.0221494
ENSG00000254087	LYN	5.75983	5.80055	5.78426	5.97067	6.04831	5.98168	6.15056	6.10809	6.06533	0.273978	5.96988	8.65977	0.00325312	0.0222002
ENSG00000157500	APPL1	3.72676	3.57708	3.55254	3.8925	3.84163	3.80925	4.17078	4.3453	4.29098	0.454867	3.93857	8.65299	0.00326524	0.0222542
ENSG00000135124	P2RX4	3.27879	3.49478	3.22859	4.04522	3.95441	3.83131	3.56897	3.58845	3.60397	0.440853	3.64632	8.64901	0.00327239	0.0222856
ENSG00000178105	DDX10	4.38517	4.39644	4.42011	4.51314	4.77204	4.56299	5.44161	5.39157	5.36883	0.66297	4.87372	8.64691	0.00327617	0.0222961
ENSG00000152583	SPARCL1	-3.5528	-2.81744	-1.54826	-1.10217	-0.440445	-0.963779	-0.674334	-1.85796	-1.5426	1.59716	-1.34324	8.64092	0.00328696	0.0223618
ENSG00000104290	FZD3	2.75246	2.67338	2.46819	3.17125	3.10951	3.25143	2.8286	3.02571	2.89878	0.422241	2.92919	8.63787	0.00329246	0.0223852
ENSG00000110075	PPP6R3	5.27658	5.12758	5.21548	5.45207	5.4678	5.318	5.71616	5.65291	5.676	0.346595	5.44769	8.63761	0.00329294	0.0223852
ENSG00000155542	SETD9	2.66584	2.49496	2.51225	2.83548	2.69679	3.00208	3.2834	3.03261	3.17661	0.459888	2.8801	8.63711	0.00329383	0.0223855
ENSG00000104205	SGK3	0.955642	0.571044	0.831272	1.24784	1.31943	1.35291	1.25201	1.24177	1.15626	0.481642	1.12396	8.6355	0.00329674	0.0223996
ENSG00000129680	MAP7D3	4.60155	4.70343	4.74725	4.91558	4.97985	4.78057	5.50869	5.46992	5.41036	0.521897	5.0529	8.63322	0.00330088	0.0224204
ENSG00000117394	SLC2A1	7.86458	7.85077	7.8523	9.01134	8.97836	8.97732	8.02171	8.0908	8.06831	0.742497	8.39062	8.63186	0.00330335	0.0224214
ENSG00000171621	SPSB1	4.73398	4.81762	4.87087	5.33151	5.36417	5.47588	5.0952	4.99213	4.95018	0.407399	5.09215	8.63198	0.00330312	0.0224214
ENSG00000168884	TNIP2	5.1956	5.11678	5.16461	6.09959	6.09567	6.08667	5.22337	5.4142	5.45569	0.61751	5.59854	8.63045	0.0033059	0.022433
ENSG00000112531	QKI	4.67114	4.67766	4.67398	4.73202	4.8671	5.06235	5.27567	5.23734	5.25472	0.412099	4.96133	8.62929	0.00330801	0.0224415
ENSG00000116641	DOCK7	5.45578	5.63458	5.65018	5.85287	5.91089	5.64897	6.75882	6.82944	6.74097	0.790065	6.15391	8.61806	0.00332847	0.0225687
ENSG00000126067	PSMB2	8.40456	8.42508	8.45183	9.01952	9.03952	9.06252	8.5818	8.63326	8.58952	0.410574	8.71352	8.61431	0.00333533	0.0225979
ENSG00000149050	ZNF214	-4.58787	-4.58787	-4.58787	-4.03822	-2.43645	-3.05764	-4.58787	-2.84476	-3.44437	4.70116	-3.54956	8.61457	0.00333484	0.0225979
ENSG00000219410	ENSG00000219410	-4.58787	-4.58787	-3.23867	-2.66857	-2.02274	-2.64959	-3.58431	-2.65541	-2.04273	2.50249	-2.87385	8.61511	0.00333386	0.0225979
ENSG00000128656	CHN1	0.206795	0.219966	-0.259575	0.535316	0.848273	0.723581	0.463428	0.96709	0.510248	0.635177	0.512595	8.61056	0.0033422	0.0226386
ENSG00000164164	OTUD4	4.46001	4.48308	4.50843	4.67435	4.74038	4.77747	4.78447	4.84505	4.79813	0.287285	4.68147	8.60955	0.00334405	0.0226453
ENSG00000131848	ZSCAN5A	3.52009	3.46364	3.41132	4.41874	4.33671	4.49554	3.59415	3.6814	3.79898	0.637784	3.91945	8.60152	0.00335883	0.0227298
ENSG00000298854	ENSG00000298854	1.82044	1.97541	1.76963	2.08588	2.38284	2.13735	2.4471	2.29938	2.33471	0.431148	2.15735	8.60071	0.00336032	0.0227322
ENSG00000131507	NDFIP1	6.90294	6.91237	6.80878	7.06424	7.10534	7.08686	7.16408	7.22564	7.19137	0.265333	7.05763	8.5942	0.00337236	0.0228079
ENSG00000141448	GATA6	1.64035	1.42704	1.30202	1.69715	1.981	1.85372	1.90299	1.9947	2.01395	0.45269	1.77629	8.5875	0.00338478	0.0228743
ENSG00000264364	DYNLL2	6.79712	6.84349	6.76591	7.13047	7.11898	7.16432	7.06581	6.92641	7.04112	0.274149	6.9909	8.58776	0.0033843	0.0228743
ENSG00000074201	CLNS1A	6.97901	6.98931	7.0037	7.45944	7.49519	7.47884	7.14099	7.13457	7.22861	0.341003	7.22667	8.58484	0.00338974	0.022902
ENSG00000154065	ANKRD29	2.61023	2.42665	2.70494	2.83938	2.86011	2.80545	3.41922	3.39317	3.46637	0.578111	2.99234	8.58284	0.00339345	0.0229212
ENSG00000085998	POMGNT1	7.67371	7.64889	7.6704	8.12707	8.09598	8.07008	7.88545	7.81123	7.83027	0.311649	7.87937	8.58182	0.00339536	0.0229282
ENSG00000106484	MEST	4.03584	4.05029	4.19191	4.281	4.31464	4.35038	4.52252	4.59996	4.59701	0.356248	4.34105	8.57615	0.00340596	0.0229822
ENSG00000130449	ZSWIM6	4.56877	4.53767	4.54734	4.8428	4.8292	4.63086	5.0667	5.01322	4.97806	0.349637	4.79328	8.5765	0.00340529	0.0229822
ENSG00000123094	RASSF8	4.78396	4.70897	4.64705	4.7466	5.00396	5.03583	5.33736	5.33268	5.24996	0.418765	5.0063	8.57485	0.00340838	0.0229926
ENSG00000154380	ENAH	6.93313	6.92599	6.88408	7.10179	7.08505	7.20501	7.19445	7.24564	7.21866	0.261818	7.09425	8.56825	0.00342075	0.0230702
ENSG00000164654	MIOS	-0.129478	-1.1756	-1.02301	-0.0772004	-0.151181	-0.112552	0.301651	0.453318	0.230071	0.870414	-0.101815	8.56392	0.00342889	0.0231134
ENSG00000004142	POLDIP2	8.50924	8.47789	8.47828	8.93081	8.90344	8.87601	8.6619	8.64252	8.69095	0.300853	8.69588	8.56073	0.00343492	0.0231481
ENSG00000163249	CCNYL1	4.5767	4.48308	4.48236	4.73828	4.70913	4.71307	4.99099	4.95447	4.95953	0.335162	4.74632	8.53831	0.00347748	0.0233931
ENSG00000037897	METTL1	4.48833	4.51381	4.29326	5.10371	4.99288	5.10329	4.64082	4.62985	4.66006	0.436976	4.74015	8.53584	0.00348221	0.0234131
ENSG00000161980	POLR3K	6.65133	6.62785	6.6269	7.34911	7.30884	7.38623	6.80268	6.80622	6.83451	0.470866	6.96561	8.53611	0.00348168	0.0234131
ENSG00000139517	LNX2	3.32349	3.33192	3.35194	3.39402	3.5583	3.77863	4.10573	4.10948	3.95446	0.5067	3.69142	8.53159	0.00349035	0.0234618
ENSG00000124733	MEA1	6.73022	6.76771	6.75592	7.37716	7.26674	7.35231	6.95792	6.88363	6.94725	0.394256	7.02569	8.5229	0.00350704	0.0235681
ENSG00000067177	PHKA1	4.57142	4.53143	4.55526	4.84861	4.93907	4.78468	4.81263	4.79113	4.83545	0.283852	4.74778	8.5195	0.0035136	0.0236061
ENSG00000136830	NIBAN2	9.16584	9.19231	9.16277	9.69316	9.61719	9.67037	9.31326	9.35376	9.36703	0.337679	9.40735	8.51405	0.00352416	0.023671
ENSG00000024422	EHD2	7.3357	7.34673	7.36343	7.59397	7.56619	7.53794	7.56119	7.68674	7.68995	0.258622	7.52611	8.51047	0.00353109	0.0237115
ENSG00000132952	USPL1	2.87334	2.70034	2.94087	2.95151	3.1893	3.18758	3.54851	3.35514	3.42306	0.448455	3.15392	8.50797	0.00353594	0.0237381
ENSG00000104976	SNAPC2	4.29506	4.24597	4.29326	5.34046	5.30644	5.29654	4.39937	4.51258	4.54669	0.682649	4.76658	8.50744	0.00353697	0.023739
[truncated: 432 more rows]

## Sheet: FDR<0.05_and_Downregulated_DEGs
Table SIII. Differentially expressed genes (DEGs).
Gene ID	Gene Name	shNC_1	shNC_2	shNC_3	shMAGEA1_1_1	shMAGEA1_1_2	shMAGEA1_1_3	shMAGEA1_2_1	shMAGEA1_2_2	shMAGEA1_2_3	logFC	logCPM	LR	PValue	FDR
ENSG00000111319	SCNN1A	7.03191	7.13187	7.1295	4.44196	4.55073	4.43136	4.32913	4.44952	4.32214	-2.67738	5.90637	822.188	8.09e-181	2.14e-176
ENSG00000173599	PC	8.89611	8.86647	8.85284	7.20023	7.14736	7.18081	7.21731	7.31273	7.30238	-1.64413	8.00065	381.328	6.39e-85	8.46e-81
ENSG00000179094	PER1	7.71922	7.71483	7.72042	5.89555	5.91969	5.82415	5.98339	6.09497	6.10697	-1.74451	6.8087	340.461	5.06e-76	4.46e-72
ENSG00000143416	SELENBP1	8.85306	8.8187	8.82472	7.21716	7.13082	7.20654	7.36029	7.35962	7.32495	-1.56335	7.99302	306.183	1.48e-68	7.83e-65
ENSG00000198089	SFI1	6.36709	6.40185	6.3858	4.88954	4.91287	4.90583	4.88684	4.91207	4.96535	-1.47407	5.58287	295.57	3.04e-66	1.15e-62
ENSG00000105289	TJP3	4.25441	4.36729	4.26617	2.16865	1.69238	2.05796	2.30793	2.18635	2.07548	-2.21343	3.23181	266.848	5.52e-60	1.62e-56
ENSG00000158106	RHPN1	4.89918	4.81042	4.79709	3.13688	2.94301	3.29824	3.20058	3.0153	3.16047	-1.71038	3.94083	233.393	1.08e-52	2.21e-49
ENSG00000064687	ABCA7	7.15626	7.20762	7.21197	5.89087	5.9104	5.96772	5.9161	5.99958	5.97941	-1.24819	6.48868	219.251	1.32e-49	2.49e-46
ENSG00000245532	NEAT1	8.24816	8.20438	8.14664	5.63001	5.52787	5.64615	6.21772	6.11826	6.16423	-2.28897	7.11049	206.109	9.7e-47	1.71e-43
ENSG00000107331	ABCA2	8.4709	8.50156	8.48693	7.383	7.31181	7.33365	7.28884	7.3567	7.35007	-1.14904	7.82904	203.488	3.62e-46	5.98e-43
ENSG00000118898	PPL	6.19435	6.24969	6.25291	4.60288	4.49425	4.57374	4.79862	4.87991	4.79683	-1.53641	5.40477	198.554	4.32e-45	6.72e-42
ENSG00000157514	TSC22D3	7.15494	7.15276	7.12861	5.6862	5.70516	5.70107	5.30341	5.36379	5.45652	-1.60046	6.29153	194.621	3.12e-44	4.58e-41
ENSG00000160781	PAQR6	3.71961	3.73319	3.7836	1.84386	1.71951	1.71396	1.82856	1.85375	2.23036	-1.8852	2.78923	192.888	7.44e-44	1.04e-40
ENSG00000286134	ENSG00000286134	7.05434	6.95077	6.97373	5.55625	5.58553	5.61528	5.74342	5.76385	5.79051	-1.31572	6.25974	192.712	8.14e-44	1.08e-40
ENSG00000185133	INPP5J	5.26271	5.39776	5.28301	3.41764	3.39962	3.5292	3.77237	3.69451	3.82992	-1.70312	4.423	191.964	1.19e-43	1.49e-40
ENSG00000009950	MLXIPL	4.21767	4.31446	4.41141	1.78049	1.83151	1.62494	2.07739	2.44615	2.19119	-2.31019	3.22335	187.561	1.08e-42	1.3e-39
ENSG00000188747	NOXA1	3.1676	3.21526	3.29316	1.63581	1.19608	1.35291	1.40782	1.30013	1.47605	-1.84066	2.28614	184.18	5.93e-42	6.53e-39
ENSG00000106018	VIPR2	4.50505	4.64449	4.61205	3.07879	3.09577	3.04731	3.20385	3.23763	3.22396	-1.44336	3.8005	184.212	5.83e-42	6.53e-39
ENSG00000188549	CCDC9B	5.39799	5.25882	5.38281	3.98851	3.91779	3.95881	4.1214	4.10621	4.0341	-1.32689	4.60944	177.563	1.65e-40	1.68e-37
ENSG00000142798	HSPG2	9.07855	9.10757	9.1011	7.8962	7.75994	7.7627	7.89966	7.98093	7.99741	-1.21014	8.40966	176.971	2.22e-40	2.1e-37
ENSG00000158769	F11R	6.18529	6.16956	6.1869	4.96095	5.03218	5.13749	5.05042	5.0167	5.00429	-1.14677	5.52447	165.472	7.21e-38	6.58e-35
ENSG00000134324	LPIN1	6.06259	5.99863	6.02761	4.86588	4.92166	4.87431	4.89902	4.98503	4.91935	-1.11944	5.3868	160.357	9.45e-37	7.81e-34
ENSG00000213347	MXD3	5.30313	5.29685	5.3399	3.88122	3.79351	3.77242	4.04311	3.99755	4.14486	-1.37154	4.55574	152.21	5.7e-35	4.43e-32
ENSG00000099994	SUSD2	3.42367	3.32616	3.49056	1.0061	1.0035	1.59713	0.463428	0.937982	0.849117	-2.41895	2.29303	150.968	1.07e-34	8.05e-32
ENSG00000204529	GUCY2EP	3.20903	3.27626	3.27089	1.43439	1.19608	1.43899	1.81148	1.24177	1.35366	-1.84045	2.31224	149.512	2.22e-34	1.63e-31
ENSG00000223617	LINC00370	6.22707	6.30782	6.35513	4.59714	4.83024	4.60083	4.96902	4.99567	4.9975	-1.45731	5.50264	147.299	6.75e-34	4.82e-31
ENSG00000158104	HPD	10.4576	10.4869	10.4682	8.20946	8.20658	8.19082	8.75757	8.83244	8.76984	-1.94701	9.48885	146.139	1.21e-33	8.42e-31
ENSG00000165124	SVEP1	7.95703	8.00886	7.97804	6.6016	6.58706	6.507	6.78775	6.90729	6.80983	-1.2747	7.26583	144.971	2.18e-33	1.48e-30
ENSG00000104883	PEX11G	5.25696	5.24057	5.33761	3.75914	3.54825	3.70018	4.03026	3.9798	3.63933	-1.49433	4.46873	143.668	4.2e-33	2.78e-30
ENSG00000112149	CD83	7.67986	7.62491	7.66064	5.97864	6.11197	6.01491	6.40722	6.4082	6.3593	-1.431	6.8711	142.456	7.73e-33	4.98e-30
ENSG00000125726	CD70	6.81232	6.78592	6.7679	5.71984	5.74971	5.79995	5.67722	5.84106	5.72276	-1.03647	6.18593	141.77	1.09e-32	6.56e-30
ENSG00000103335	PIEZO1	9.61601	9.61567	9.59477	8.65768	8.55195	8.61421	8.61677	8.69213	8.68936	-0.971092	9.03845	140.622	1.95e-32	1.14e-29
ENSG00000135116	HRK	4.66743	4.65945	4.72519	3.37	3.39682	3.29536	3.6189	3.43022	3.31424	-1.27888	3.96775	137.025	1.19e-31	6.7e-29
ENSG00000168010	ATG16L2	3.91795	4.06765	3.81911	2.53786	2.41639	2.71345	2.48528	2.51183	2.62074	-1.39434	3.17241	134.453	4.35e-31	2.35e-28
ENSG00000158292	GPR153	5.36705	5.43569	5.38059	3.9148	3.86814	3.90689	4.05586	4.26699	4.2051	-1.35284	4.6451	133.643	6.54e-31	3.46e-28
ENSG00000100767	PAPLN	5.08219	5.25124	5.33608	4.01457	3.88422	3.77242	3.9719	4.11111	3.91172	-1.28075	4.50928	133.287	7.82e-31	4.06e-28
ENSG00000180447	GAS1	6.62159	6.61196	6.63937	5.61363	5.54819	5.65292	5.62381	5.66517	5.69363	-0.991397	6.04398	132.207	1.35e-30	6.86e-28
ENSG00000187017	ESPN	3.22595	3.09512	3.12951	1.5529	1.38867	1.4903	1.8786	1.57997	1.61278	-1.57249	2.31254	129.549	5.14e-30	2.57e-27
ENSG00000179862	CITED4	6.37924	6.54134	6.55004	4.97959	4.84981	4.84209	5.14205	5.30231	5.25567	-1.42012	5.71302	129.229	6.04e-30	2.85e-27
ENSG00000237886	NALT1	3.27879	3.28816	3.18161	1.82828	1.75491	1.45973	1.78548	1.48254	1.325	-1.64183	2.38355	127.869	1.2e-29	5.56e-27
ENSG00000293984	ENSG00000293984	1.82044	1.86854	1.84909	-0.602423	-0.151181	-0.344579	0.173873	-0.425789	-0.0791264	-2.11996	0.822316	127.431	1.5e-29	6.82e-27
ENSG00000227964	LINC01429	2.01208	2.02602	2.09348	-0.231957	0.0331122	-0.274392	0.373216	0.278576	0.134184	-2.01621	1.05098	125.37	4.22e-29	1.89e-26
ENSG00000198911	SREBF2	8.90112	8.90235	8.90342	7.95759	7.9019	7.94603	7.96349	8.00995	8.06777	-0.927034	8.35434	124.755	5.76e-29	2.54e-26
ENSG00000167702	KIFC2	4.77249	4.90616	4.80707	3.70897	3.5558	3.75155	3.67897	3.49161	3.46308	-1.21911	4.14023	123.248	1.23e-28	5.25e-26
ENSG00000272752	STAG3L5P-PVRIG2P-PILRB	6.05409	6.08641	6.17966	5.06185	5.16393	5.07501	4.9671	4.92511	4.90368	-1.08928	5.47907	123.276	1.21e-28	5.25e-26
ENSG00000154358	OBSCN	8.02191	7.98907	7.99306	7.10685	6.97959	6.99104	6.79727	6.82024	6.83069	-1.07616	7.37895	122.506	1.79e-28	7.39e-26
ENSG00000160957	RECQL4	7.29238	7.2725	7.26425	6.42281	6.31089	6.35925	6.28961	6.34931	6.36327	-0.926921	6.7286	121.706	2.68e-28	1.09e-25
ENSG00000250337	PURPL	5.00392	4.86207	4.96107	3.924	3.89616	3.85694	3.73664	3.8014	3.7486	-1.11598	4.30236	121.65	2.75e-28	1.1e-25
ENSG00000128159	TUBGCP6	6.36021	6.46183	6.38839	5.43416	5.48701	5.43325	5.35367	5.31793	5.25946	-1.02157	5.80863	119.909	6.62e-28	2.61e-25
ENSG00000198938	MT-CO3	14.2157	14.3045	14.3018	13.4497	13.4364	13.3288	13.3505	13.3349	13.3099	-0.905205	13.7378	119.833	6.88e-28	2.68e-25
ENSG00000267751	BSG-AS1	4.08488	4.13836	4.17316	2.79597	2.61246	2.70912	2.80722	2.92547	3.04657	-1.31599	3.40057	116.953	2.94e-27	1.09e-24
ENSG00000156381	ANKRD9	5.52371	5.54012	5.45937	4.41091	4.22598	4.33221	4.45403	4.50019	4.52007	-1.09921	4.87518	116.881	3.05e-27	1.11e-24
ENSG00000142303	ADAMTS10	5.6029	5.66797	5.70579	4.68844	4.62315	4.69678	4.71501	4.52119	4.60598	-1.0173	5.0664	115.91	4.97e-27	1.78e-24
ENSG00000160796	NBEAL2	6.9457	6.88619	6.93404	6.06053	5.97421	5.98884	5.89295	5.99075	6.03246	-0.931727	6.37196	115.765	5.35e-27	1.89e-24
ENSG00000229980	TOB1-AS1	1.43453	0.915875	1.11464	-1.10217	-1.80092	-0.963779	-1.41162	-1.27743	-1.3454	-2.57834	0.0265601	114.947	8.08e-27	2.81e-24
ENSG00000185262	UBALD2	5.42314	5.33892	5.4216	4.28671	4.37418	4.4842	4.415	4.35083	4.34373	-1.01919	4.80106	114.72	9.06e-27	3.11e-24
ENSG00000182272	B4GALNT4	6.49402	6.49589	6.52741	5.58551	5.49292	5.61932	5.35735	5.45202	5.40694	-1.01757	5.91231	114.249	1.15e-26	3.85e-24
ENSG00000123999	INHA	1.75668	1.7954	1.66616	-0.520328	-1.15009	-0.665444	-0.121643	-0.214955	-0.241151	-2.25279	0.677628	112.763	2.43e-26	8.04e-24
ENSG00000196517	SLC6A9	7.78848	7.74468	7.76108	6.88449	6.96384	6.92429	6.85726	6.89148	6.87956	-0.864467	7.24934	110.46	7.77e-26	2.51e-23
ENSG00000161888	SPC24	7.74028	7.68955	7.76008	6.7532	6.71558	6.82137	6.85492	6.91081	6.84527	-0.912199	7.18998	109.819	1.07e-25	3.42e-23
ENSG00000123384	LRP1	8.71901	8.76398	8.74905	7.95243	7.8735	7.84433	7.84577	7.90622	7.91611	-0.853989	8.23407	109.401	1.33e-25	4.12e-23
ENSG00000114544	SLC41A3	5.93105	5.81398	5.86666	4.52527	4.55951	4.53395	4.78884	4.86065	4.84052	-1.18068	5.19947	108.68	1.91e-25	5.86e-23
ENSG00000137198	GMPR	-0.274208	0.117007	-0.29711	-3.64117	-4.58787	-4.58787	-4.58787	-3.06278	-4.58787	-5.23322	-1.54518	108.649	1.94e-25	5.89e-23
ENSG00000288098	ENSG00000288098	1.91528	2.01174	2.17798	0.114871	-0.440445	0.139632	-0.188772	0.453318	-0.00446324	-2.03885	1.03773	108.038	2.64e-25	7.92e-23
ENSG00000228253	MT-ATP8	11.0985	11.1935	11.191	10.1777	10.3597	10.1338	10.3048	10.1142	10.1267	-0.955692	10.599	107.823	2.94e-25	8.73e-23
ENSG00000162076	FLYWCH2	7.44069	7.46412	7.39651	6.59269	6.49977	6.63076	6.51695	6.5451	6.56559	-0.875146	6.91298	107.457	3.53e-25	1.04e-22
ENSG00000204634	TBC1D8	5.34477	5.44701	5.45091	4.45217	4.30273	4.25422	4.43326	4.45852	4.44712	-1.02307	4.8193	107.307	3.81e-25	1.11e-22
ENSG00000021762	OSBPL5	8.07679	8.06072	8.11729	7.19663	7.11792	7.15282	7.25766	7.26372	7.25378	-0.87716	7.56299	106.845	4.81e-25	1.38e-22
ENSG00000184481	FOXO4	4.52706	4.50746	4.59678	3.02513	3.01777	2.97352	3.36173	3.37156	3.38885	-1.34752	3.79765	104.577	1.51e-24	4.21e-22
ENSG00000090238	YPEL3	2.4809	2.61789	2.36383	1.16342	1.0035	1.01739	0.740999	1.0236	1.00182	-1.51208	1.67978	104.482	1.59e-24	4.37e-22
ENSG00000161996	WDR90	7.61889	7.57919	7.58352	6.74232	6.60989	6.70648	6.44404	6.49383	6.45749	-1.01356	7.00232	103.963	2.06e-24	5.56e-22
ENSG00000110042	DTX4	7.11418	7.07464	7.1306	6.1463	6.21247	6.15464	6.32275	6.25252	6.22707	-0.886513	6.57973	103.136	3.13e-24	8.36e-22
ENSG00000253438	PCAT1	8.19491	8.2198	8.21292	6.52543	6.61472	6.48788	6.96662	7.04334	7.0192	-1.41404	7.43221	102.891	3.54e-24	9.36e-22
ENSG00000198804	MT-CO1	14.7514	14.7761	14.797	13.8258	13.9055	13.8313	13.5566	13.5749	13.5462	-1.06046	14.1601	99.5824	1.88e-23	4.83e-21
ENSG00000198712	MT-CO2	13.9046	13.9603	13.9809	13.1596	13.2295	13.1146	13.1377	13.1115	13.121	-0.802733	13.466	99.5614	1.9e-23	4.84e-21
ENSG00000134042	MRO	2.54701	2.34926	2.63691	0.978128	0.746433	0.790603	0.942656	1.15589	1.17244	-1.56357	1.68307	99.3381	2.13e-23	5.36e-21
ENSG00000184381	PLA2G6	3.6284	3.83604	3.85592	2.722	2.65524	2.67405	2.55875	2.53631	2.57886	-1.15937	3.11672	99.1248	2.37e-23	5.91e-21
ENSG00000141639	MAPK4	3.91795	4.04328	3.92479	2.82767	2.75038	2.76018	2.48528	2.32771	2.63249	-1.3276	3.22584	98.6988	2.94e-23	7.27e-21
ENSG00000006534	ALDH3B1	6.63337	6.7213	6.61779	5.64343	5.56199	5.46438	5.73552	5.74927	5.78329	-0.998331	6.07443	98.4162	3.39e-23	8.3e-21
ENSG00000198786	MT-ND5	12.393	12.4748	12.505	11.5842	11.7026	11.5601	11.4651	11.4329	11.4032	-0.930014	11.9088	98.1466	3.89e-23	9.43e-21
ENSG00000223764	LINC02593	4.64118	4.71999	4.6679	3.16196	3.21177	3.1077	3.43045	3.53842	3.61586	-1.32398	3.9405	98.0471	4.09e-23	9.82e-21
ENSG00000092758	COL9A3	5.14846	5.16274	5.0469	4.11752	3.90209	3.91066	3.56133	3.70318	3.61289	-1.30742	4.3905	97.6715	4.94e-23	1.17e-20
ENSG00000254975	ENSG00000254975	0.479314	0.820795	0.796057	-3.33014	-3.01875	-3.62872	-1.67481	-2.33809	-2.37764	-3.64597	-0.615235	96.3051	9.85e-23	2.24e-20
ENSG00000130517	PGPEP1	5.17135	5.18438	5.19872	3.54704	3.1893	3.47419	3.97382	3.83534	3.83755	-1.52145	4.36372	95.5376	1.45e-22	3.25e-20
ENSG00000242588	ENSG00000242588	5.71619	5.74552	5.76333	4.81836	4.83748	4.91993	4.74342	4.82532	4.64564	-0.9414	5.18669	95.4066	1.55e-22	3.45e-20
ENSG00000039650	PNKP	6.07244	5.94704	6.01282	5.11097	5.10171	5.14231	5.16743	5.20334	5.07594	-0.877916	5.48926	95.1762	1.74e-22	3.81e-20
ENSG00000167700	MFSD3	6.44321	6.45657	6.47583	5.66716	5.34905	5.47524	5.29882	5.40227	5.25946	-1.04378	5.85208	95.1367	1.78e-22	3.85e-20
ENSG00000012822	CALCOCO1	5.75342	5.87146	5.80212	4.91558	4.88018	4.84997	4.69187	4.57536	4.78766	-1.02273	5.21401	95.035	1.87e-22	4.02e-20
ENSG00000198899	MT-ATP6	13.0106	13.1613	13.1608	12.185	12.3519	12.1485	12.0365	12.0097	12.0106	-0.983632	12.5359	94.8201	2.08e-22	4.45e-20
ENSG00000178814	OPLAH	5.69569	5.70228	5.74325	4.47986	4.40932	4.41818	4.71501	4.7383	4.76783	-1.11931	5.07118	94.6546	2.27e-22	4.8e-20
ENSG00000164128	NPY1R	3.71002	3.65265	3.66417	1.91935	1.981	2.14377	2.58411	2.29938	2.26095	-1.4693	2.87814	94.4463	2.52e-22	5.27e-20
ENSG00000196642	RABL6	7.64601	7.59932	7.63705	6.62912	6.62761	6.66074	6.77625	6.85302	6.81724	-0.897685	7.09484	94.1376	2.94e-22	6.08e-20
ENSG00000166924	NYAP1	2.44667	2.44801	2.6219	0.372945	0.896618	0.190153	0.878519	0.908274	0.230071	-1.918	1.54338	93.2231	4.67e-22	9.5e-20
ENSG00000179222	MAGED1	6.39279	6.42829	6.41075	5.61419	5.55573	5.43914	5.59542	5.46992	5.39837	-0.896665	5.8785	93.234	4.65e-22	9.5e-20
ENSG00000142583	SLC2A5	0.889228	0.85319	0.741567	-1.59583	-1.90757	-3.05764	-1.77441	-1.66698	-3.44437	-3.11695	-0.417779	92.234	7.7e-22	1.55e-19
ENSG00000124839	RAB17	5.75634	5.67535	5.59746	4.5763	4.44498	4.44573	4.03578	3.93078	4.14691	-1.39637	4.90883	92.0816	8.32e-22	1.67e-19
ENSG00000167077	MEI1	4.12512	4.19633	4.11897	2.69218	2.96207	3.14339	2.6813	2.58407	2.64993	-1.35171	3.39886	92.0493	8.45e-22	1.68e-19
ENSG00000234076	TPRG1-AS1	0.689054	1.04769	0.722936	-1.77465	-2.14791	-1.41389	-1.25953	-1.42088	-1.01711	-2.43849	-0.266715	91.2133	1.29e-21	2.53e-19
ENSG00000124006	OBSL1	6.08733	6.09448	6.10608	5.32527	5.24786	5.24371	5.11447	5.22685	5.23077	-0.863766	5.58102	91.2244	1.28e-21	2.53e-19
ENSG00000214708	ENSG00000214708	0.649474	0.736475	1.08576	-1.68247	-1.43911	-1.85127	-1.12197	-1.08589	-1.3454	-2.3591	-0.242053	91.0063	1.43e-21	2.78e-19
ENSG00000187535	IFT140	5.53053	5.59622	5.57231	4.79149	4.6327	4.6792	4.70001	4.69763	4.65862	-0.873306	5.04679	90.6746	1.69e-21	3.27e-19
ENSG00000198695	MT-ND6	10.1727	10.2816	10.3712	9.30649	9.55501	9.30549	9.28382	9.21158	9.20194	-0.961844	9.7117	90.1391	2.22e-21	4.22e-19
ENSG00000124203	ZNF831	7.54734	7.60171	7.55631	6.43121	6.38089	6.42005	6.71329	6.71103	6.65396	-1.01022	6.97876	89.2253	3.52e-21	6.56e-19
ENSG00000120899	PTK2B	5.70356	5.74498	5.71289	4.78948	4.73927	4.84406	4.45678	4.58596	4.49937	-1.06132	5.10563	89.0105	3.93e-21	7.26e-19
ENSG00000235823	OLMALINC	5.35864	5.31441	5.39684	3.5636	3.40241	3.45882	4.00231	4.14494	3.97536	-1.57292	4.51482	88.9382	4.07e-21	7.48e-19
ENSG00000205517	RGL3	5.16697	5.19469	5.142	4.28528	4.14491	4.32375	4.13176	3.99402	4.07341	-1.00581	4.58074	88.8828	4.19e-21	7.59e-19
ENSG00000126803	HSPA2	6.4814	6.48139	6.4713	5.18013	5.16146	5.18185	5.55174	5.48005	5.52822	-1.12135	5.83408	88.7195	4.55e-21	8.18e-19
ENSG00000167972	ABCA3	2.88617	2.68242	2.79688	1.40317	1.71951	1.12519	1.30177	1.22981	1.21992	-1.45716	1.99994	86.1573	1.66e-20	2.91e-18
ENSG00000110719	TCIRG1	5.9652	5.96428	5.96804	5.23656	5.14655	5.09834	5.14546	5.09296	5.13803	-0.822742	5.47254	85.6626	2.13e-20	3.71e-18
ENSG00000127838	PNKD	6.08687	5.98773	5.95463	5.00753	4.80302	4.87238	5.09078	5.17711	5.09198	-0.998836	5.42687	85.0088	2.97e-20	5.13e-18
ENSG00000181513	ACBD4	4.53523	4.59626	4.58908	2.75946	2.86416	2.88428	3.07742	3.34131	3.4956	-1.48404	3.76882	84.4774	3.89e-20	6.63e-18
ENSG00000198727	MT-CYB	12.7234	12.8018	12.8691	12.0173	12.1345	11.9494	12.0298	12.018	12.0152	-0.770931	12.3334	82.9946	8.23e-20	1.38e-17
ENSG00000141295	SCRN2	5.61323	5.61346	5.58074	4.7497	4.59413	4.66476	4.77899	4.81435	4.7916	-0.869364	5.0849	82.8233	8.97e-20	1.47e-17
ENSG00000163995	ABLIM2	3.75034	3.63413	3.62958	1.74773	1.91212	1.71396	2.50135	2.28789	2.15907	-1.59985	2.82157	82.5135	1.05e-19	1.71e-17
ENSG00000103253	HAGHL	6.02103	6.05933	5.97297	5.2665	4.93522	5.08338	4.94769	5.01496	5.16456	-0.945503	5.46116	82.4982	1.06e-19	1.72e-17
ENSG00000127585	FBXL16	6.55152	6.5866	6.64958	5.37506	5.23851	5.29004	5.57911	5.63941	5.72414	-1.11155	5.95718	82.4166	1.1e-19	1.78e-17
ENSG00000131480	AOC2	3.87569	3.85016	3.88554	2.94068	2.82723	2.95172	2.78989	2.67948	2.89878	-1.02365	3.27555	82.2598	1.19e-19	1.91e-17
ENSG00000159433	STARD9	4.51197	4.59267	4.62966	3.48627	3.70352	3.51192	3.72072	3.63454	3.6335	-0.963834	4.01333	82.2366	1.21e-19	1.92e-17
ENSG00000228315	GUSBP11	3.19535	3.46626	3.31198	1.97702	2.04674	1.814	2.09866	2.26464	2.22261	-1.26016	2.62349	82.2018	1.23e-19	1.95e-17
ENSG00000176155	CCDC57	6.66473	6.7276	6.63999	5.83349	5.87766	5.93477	5.6372	5.73188	5.70201	-0.888308	6.15004	82.0113	1.35e-19	2.13e-17
ENSG00000143224	PPOX	5.31187	5.40392	5.37164	4.38185	4.50338	4.60898	4.46499	4.38088	4.52322	-0.884955	4.83734	81.0558	2.19e-19	3.39e-17
ENSG00000204054	LINC00963	4.44996	4.35462	4.349	3.46376	3.37707	3.43545	3.57404	3.43804	3.46308	-0.927939	3.83785	80.9295	2.34e-19	3.6e-17
ENSG00000102287	GABRE	7.28615	7.26838	7.25414	6.3273	6.42757	6.35095	6.05224	6.01708	5.99656	-1.06374	6.65325	80.4393	3e-19	4.58e-17
ENSG00000115255	REEP6	5.34089	5.42361	5.35662	4.63234	4.49163	4.46124	4.30188	4.409	4.44712	-0.914613	4.83303	80.306	3.21e-19	4.87e-17
ENSG00000188157	AGRN	8.26391	8.34521	8.31168	7.61015	7.43389	7.42465	7.43257	7.58289	7.56814	-0.796572	7.82772	79.0712	5.99e-19	8.95e-17
ENSG00000117013	KCNQ4	1.33824	1.53082	1.31452	0.00826462	-0.362513	-0.963779	-0.451874	-0.425789	-0.524441	-1.87757	0.457994	79.0224	6.14e-19	9.12e-17
ENSG00000112659	CUL9	5.93825	5.98453	5.89866	5.1222	5.17214	5.0263	5.05496	5.11913	5.2269	-0.820106	5.44917	78.125	9.67e-19	1.41e-16
ENSG00000102934	PLLP	5.6513	5.70672	5.74325	4.92477	4.86811	4.79492	4.90003	4.95084	4.92054	-0.807739	5.21571	77.9288	1.07e-18	1.55e-16
ENSG00000172828	CES3	3.35766	3.15156	3.60943	2.22923	1.83978	2.13735	2.07739	1.88459	1.67089	-1.40534	2.61402	77.8765	1.1e-18	1.59e-16
ENSG00000105397	TYK2	7.85074	7.7796	7.76051	7.12051	7.06448	7.09413	6.95331	7.0177	7.01836	-0.751789	7.34201	76.5446	2.15e-18	3.08e-16
ENSG00000134830	C5AR2	4.67114	4.72547	4.69085	2.76766	2.34849	2.77267	3.16068	3.33295	3.37143	-1.69881	3.8052	75.8734	3.02e-18	4.28e-16
ENSG00000267121	FMNL1-DT	3.54457	3.64804	3.57868	2.58034	2.34269	2.53926	2.56386	2.62573	2.69543	-1.03532	2.99115	75.3561	3.93e-18	5.47e-16
ENSG00000141622	ARK2C	3.63348	3.43984	3.58385	1.73942	2.03959	1.65223	2.436	2.08378	2.28348	-1.5002	2.74438	75.1711	4.32e-18	5.98e-16
ENSG00000102882	MAPK3	5.99314	5.94469	5.97002	5.12778	5.1407	5.16538	5.26943	5.20868	5.2404	-0.777225	5.5005	75.0796	4.52e-18	6.23e-16
ENSG00000089639	GMIP	4.88647	4.92438	4.87404	4.02657	3.98081	4.03507	4.03578	4.07813	4.17329	-0.841058	4.39278	74.897	4.96e-18	6.79e-16
ENSG00000186583	SPATC1	1.80251	1.87644	1.69512	-0.933287	-0.362513	-0.578294	-0.493706	0.411577	-0.329542	-2.16819	0.754632	73.7769	8.75e-18	1.19e-15
ENSG00000099330	OCEL1	4.97419	4.96941	4.91462	3.97265	3.8762	3.9733	4.1214	4.11274	4.18928	-0.91034	4.41453	73.3685	1.08e-17	1.44e-15
ENSG00000158825	CDA	6.24833	6.28871	6.19495	5.1577	5.11369	5.09752	5.33213	5.49199	5.40694	-0.970753	5.67465	73.1929	1.18e-17	1.56e-15
ENSG00000140400	MAN2C1	6.00446	5.99274	5.92182	5.09966	5.00212	5.05895	5.02657	5.20792	5.29315	-0.856073	5.46274	72.6617	1.54e-17	1.99e-15
ENSG00000231419	LINC00689	3.00462	2.82399	3.26446	0.79785	0.880682	1.03131	1.62861	1.63542	1.38177	-1.79444	2.11903	71.8302	2.35e-17	2.98e-15
ENSG00000184985	SORCS2	5.88492	5.81244	5.93554	4.8716	4.79134	4.81619	5.08635	5.04939	5.11204	-0.919264	5.33497	71.4144	2.9e-17	3.66e-15
ENSG00000125648	SLC25A23	8.06791	8.12276	8.1639	7.45691	7.46027	7.40724	7.29423	7.31662	7.30628	-0.743504	7.66775	70.9177	3.72e-17	4.69e-15
ENSG00000178971	CTC1	5.43701	5.42832	5.57036	4.77329	4.66329	4.64678	4.70579	4.71274	4.62227	-0.792424	5.00289	70.3785	4.9e-17	6.02e-15
ENSG00000101104	PABPC1L	4.35011	4.31301	4.36561	3.53509	3.37707	3.52428	3.1874	3.36338	3.35734	-0.949537	3.78447	70.2861	5.13e-17	6.28e-15
ENSG00000125434	SLC25A35	5.38825	5.4746	5.48102	3.63027	3.55329	3.47928	4.12659	4.26846	4.2285	-1.53261	4.62267	70.1669	5.45e-17	6.64e-15
ENSG00000229891	LINC01315	4.00872	3.83199	3.77005	2.79597	2.72829	2.78093	2.51723	2.14237	2.47831	-1.28737	3.15423	69.9	6.24e-17	7.57e-15
ENSG00000212907	MT-ND4L	11.285	11.4461	11.4365	10.6681	10.7455	10.6338	10.5658	10.5533	10.4511	-0.785084	10.9175	69.7793	6.63e-17	8.01e-15
ENSG00000099797	TECR	7.64899	7.67815	7.71513	7.02612	7.02402	6.98434	6.91335	6.91642	7.00176	-0.702781	7.25239	69.5363	7.5e-17	9.02e-15
ENSG00000173227	SYT12	7.64097	7.62549	7.62032	7.00114	6.8462	6.94075	6.73496	6.76382	6.77083	-0.782742	7.15676	69.1199	9.27e-17	1.11e-14
ENSG00000077942	FBLN1	8.81045	8.80155	8.78071	8.14399	8.10619	8.1365	8.08392	8.17078	8.14181	-0.666893	8.38884	68.5419	1.24e-16	1.47e-14
ENSG00000197182	MIRLET7BHG	5.19988	5.24591	5.24597	4.44707	4.4121	4.4195	4.49872	4.46108	4.54514	-0.76755	4.76737	68.318	1.39e-16	1.64e-14
ENSG00000179832	MROH1	6.20462	6.21467	6.16421	5.40688	5.38973	5.47778	5.12574	5.1949	5.14829	-0.897812	5.66189	68.2959	1.41e-16	1.65e-14
ENSG00000183018	SPNS2	3.90119	3.99147	3.92886	3.14004	2.97338	2.96629	2.94277	3.12268	3.07267	-0.905852	3.40543	68.2441	1.44e-16	1.69e-14
ENSG00000065717	TLE2	7.13649	7.14031	7.17711	6.48034	6.3869	6.40408	6.40153	6.48316	6.51889	-0.705048	6.72161	67.7819	1.83e-16	2.13e-14
ENSG00000240038	AMY2B	1.53569	1.68275	1.70465	-0.106852	0.476465	0.238965	-0.371682	0.0253995	-0.117959	-1.62747	0.791021	67.465	2.14e-16	2.48e-14
ENSG00000196668	LINC00173	0.179265	0.117007	0.410066	-1.5141	-1.43911	-1.66014	-2.26024	-1.66698	-1.7711	-2.07701	-0.741882	66.9777	2.75e-16	3.14e-14
ENSG00000174473	GALNTL6	2.85606	2.73552	2.76991	1.21226	1.38867	1.24951	1.38492	0.995622	0.260667	-1.67256	1.91097	66.9388	2.8e-16	3.19e-14
ENSG00000153291	SLC25A27	2.30101	2.43737	2.21178	1.11286	1.15692	1.29638	1.14704	0.908274	1.20427	-1.1936	1.64795	66.5961	3.33e-16	3.77e-14
ENSG00000073350	LLGL2	6.68781	6.6838	6.68099	5.92653	5.91334	5.94077	5.55431	5.68502	5.72345	-0.886671	6.15717	66.2593	3.95e-16	4.43e-14
ENSG00000206417	H1-10-AS1	2.7098	2.67791	2.42273	1.5529	1.41103	1.40731	1.57902	1.19333	1.21992	-1.2183	1.92381	65.9788	4.56e-16	5.09e-14
ENSG00000293491	TMEM198B	2.85171	2.77832	2.74704	1.88963	1.65539	1.73963	1.54843	1.37805	1.52728	-1.16901	2.1297	65.9146	4.71e-16	5.21e-14
ENSG00000172893	DHCR7	7.01717	7.02374	7.00443	6.35849	6.39323	6.33068	6.23982	6.30654	6.26529	-0.698692	6.58877	65.8684	4.82e-16	5.31e-14
ENSG00000123838	C4BPA	8.24919	8.25176	8.21615	7.28598	7.33429	7.26589	7.53494	7.5401	7.54755	-0.815869	7.74926	65.79	5.02e-16	5.48e-14
ENSG00000160752	FDPS	8.18975	8.19651	8.17326	7.46512	7.42344	7.48106	7.57264	7.5523	7.53333	-0.681088	7.7699	65.6155	5.48e-16	5.92e-14
ENSG00000143434	SEMA6C	3.17459	3.09512	3.04579	2.03926	1.8643	2.20033	2.00414	2.13597	2.19119	-1.03644	2.50618	65.4021	6.11e-16	6.54e-14
ENSG00000293313	ZNF37BP	2.33259	2.39948	2.56551	1.41365	1.13021	1.36396	1.27711	0.981426	1.21992	-1.21076	1.75475	65.3521	6.26e-16	6.68e-14
ENSG00000268858	ENSG00000268858	3.33289	3.55017	3.33363	2.28167	2.57334	2.23081	2.32006	2.34445	2.47178	-1.04134	2.80691	65.0241	7.4e-16	7.83e-14
ENSG00000113721	PDGFRB	4.18517	4.32893	4.37608	3.34831	3.37138	3.44328	3.00417	3.04972	3.05968	-1.07755	3.67694	64.8222	8.2e-16	8.57e-14
ENSG00000301685	ENSG00000301685	1.37511	1.59927	1.37543	-0.520328	-0.965927	-0.309059	-0.773904	0.106123	-0.117959	-1.89498	0.507756	64.7479	8.51e-16	8.86e-14
ENSG00000197405	C5AR1	3.14287	3.1483	3.27729	2.35962	2.19586	2.23683	2.22008	2.14237	2.04944	-0.991252	2.61231	64.5411	9.45e-16	9.8e-14
ENSG00000157353	FCSK	5.43629	5.51186	5.50029	4.81737	4.59535	4.77023	4.57025	4.66802	4.70525	-0.793596	5.00554	64.4192	1.01e-15	1.04e-13
ENSG00000117425	PTCH2	1.78435	1.4484	1.62661	0.165358	0.295986	0.238965	-0.333198	0.278576	-0.241151	-1.56519	0.796801	64.3922	1.02e-15	1.05e-13
ENSG00000152767	FARP1	7.624	7.56	7.62894	6.67095	6.66239	6.58518	6.89852	6.93426	6.84653	-0.832591	7.10594	64.1431	1.16e-15	1.18e-13
ENSG00000066827	ZFAT	6.63812	6.68942	6.65358	5.96934	5.96668	6.02016	5.75575	5.85913	5.84768	-0.754864	6.20348	64.02	1.23e-15	1.24e-13
ENSG00000142459	EVI5L	5.78573	5.78751	5.85173	4.56342	4.41901	4.3573	4.8434	4.85092	4.95953	-1.12654	5.16241	63.7426	1.42e-15	1.42e-13
ENSG00000173237	C11orf86	5.76273	5.73252	5.78819	4.11913	4.23384	4.14641	4.74791	4.75508	4.69128	-1.2863	5.04093	62.5691	2.57e-15	2.53e-13
ENSG00000158286	RNF207	4.44419	4.40329	4.48236	3.26973	3.03947	3.62871	3.39076	3.50656	3.47618	-1.04922	3.83546	62.3557	2.87e-15	2.8e-13
ENSG00000196821	ILRUN	9.11731	9.09032	9.09534	8.47773	8.50821	8.48793	8.4121	8.46108	8.40282	-0.642243	8.70603	62.2125	3.08e-15	3e-13
ENSG00000135469	COQ10A	4.4194	4.47139	4.25	3.51576	3.43551	3.49695	3.62624	3.61398	3.44986	-0.860331	3.87088	62.127	3.22e-15	3.11e-13
ENSG00000160959	LRRC14	5.72514	5.66227	5.69029	5.0058	5.02767	5.01671	4.897	4.96533	4.9861	-0.709653	5.26059	62.0959	3.27e-15	3.15e-13
ENSG00000117448	AKR1A1	7.95766	7.9918	7.93948	7.31824	7.26059	7.34693	7.1099	7.07982	7.15493	-0.747871	7.5098	61.9006	3.61e-15	3.42e-13
ENSG00000222009	BTBD19	2.42339	2.37738	2.74242	1.13836	1.14363	0.989133	1.46354	0.952609	1.4364	-1.34103	1.78423	61.891	3.63e-15	3.43e-13
ENSG00000289902	ENSG00000289902	4.8939	4.94894	4.94508	3.9602	4.11967	3.80723	4.02471	4.18575	4.1632	-0.882331	4.40551	61.8056	3.79e-15	3.57e-13
ENSG00000141959	PFKL	8.94322	8.93133	8.94746	8.296	8.23565	8.25693	8.30675	8.34988	8.33973	-0.642692	8.54545	61.7551	3.89e-15	3.65e-13
ENSG00000134243	SORT1	6.23878	6.35383	6.36267	5.68187	5.63624	5.66413	5.58603	5.55745	5.58524	-0.700701	5.89216	61.4382	4.57e-15	4.25e-13
ENSG00000115266	APC2	6.41065	6.38117	6.37316	5.67317	5.68523	5.76496	5.76963	5.67513	5.69922	-0.677012	5.97416	61.2202	5.1e-15	4.74e-13
ENSG00000136854	STXBP1	7.00766	7.00921	7.04155	6.34896	6.41828	6.37196	6.20837	6.2328	6.22465	-0.71656	6.58335	61.1572	5.27e-15	4.87e-13
ENSG00000081052	COL4A4	4.90969	4.87987	4.97786	3.60306	3.38274	3.28958	3.85386	4.05798	3.76737	-1.24224	4.22306	60.8636	6.12e-15	5.64e-13
ENSG00000165644	COMTD1	5.53597	5.55619	5.65141	4.75074	4.3469	4.5437	4.69303	4.64344	4.87183	-0.932728	5.03176	60.7491	6.48e-15	5.89e-13
ENSG00000104953	TLE6	5.34554	5.30419	5.28062	2.69648	2.61727	2.58718	3.74566	3.57433	3.71585	-2.06543	4.29001	60.7313	6.54e-15	5.92e-13
ENSG00000166183	ASPG	1.15253	1.30354	0.478304	-0.782115	-0.610204	-0.758199	-0.996381	-0.765516	-1.01711	-1.90622	0.0771767	60.7165	6.59e-15	5.95e-13
ENSG00000131471	AOC3	3.11771	3.03638	3.11886	2.14368	1.92771	2.0982	1.54843	1.62633	1.79104	-1.22574	2.40118	60.6825	6.71e-15	6.03e-13
ENSG00000165887	ANKRD2	1.80251	1.8526	1.77868	-0.0481458	0.781185	0.419203	0.173873	0.132058	-0.0791264	-1.57846	0.977216	60.5832	7.05e-15	6.3e-13
ENSG00000204103	MAFB	2.81193	3.0399	3.00396	1.81253	1.53838	1.23755	1.8786	1.8922	1.72675	-1.26763	2.24716	60.3566	7.91e-15	7e-13
ENSG00000136205	TNS3	8.0982	8.06299	8.1295	7.50319	7.48403	7.4412	7.39545	7.43578	7.4752	-0.641015	7.70287	60.322	8.05e-15	7.1e-13
ENSG00000149476	TKFC	6.59416	6.5905	6.58914	5.94697	5.84723	5.96953	5.80672	5.89033	5.96555	-0.685981	6.17204	59.9428	9.77e-15	8.52e-13
ENSG00000163354	DCST2	2.07319	1.57033	1.42238	0.284349	-0.218244	0.0872774	-0.154817	0.255167	-0.524441	-1.76646	0.809981	59.7725	1.06e-14	9.17e-13
ENSG00000262188	LINC01978	0.0933756	0.975951	0.362712	-1.5141	-1.80092	-1.95726	-1.18911	-1.85796	-1.7711	-2.33594	-0.532351	59.4009	1.29e-14	1.1e-12
ENSG00000100078	PLA2G3	3.11044	3.13519	3.22859	1.96282	1.9584	1.93003	1.44151	2.17392	1.46296	-1.3184	2.4267	59.1428	1.47e-14	1.24e-12
ENSG00000162066	AMDHD2	5.2329	5.20571	5.23943	4.20459	4.0286	4.01244	4.40508	4.36866	4.47837	-0.967263	4.6584	59.0983	1.5e-14	1.26e-12
ENSG00000232442	MHENCR	2.82531	3.00788	2.81459	1.98407	1.90426	1.7978	1.66708	1.49259	1.83237	-1.10639	2.25238	58.8692	1.69e-14	1.4e-12
ENSG00000185189	NRBP2	4.42966	4.46747	4.52196	2.9551	2.94684	2.95537	3.49604	3.5189	3.43653	-1.2351	3.7773	58.5213	2.01e-14	1.66e-12
ENSG00000007541	PIGQ	6.52066	6.57875	6.55597	5.57154	5.5221	5.71624	5.78775	5.86252	5.8905	-0.821015	6.0596	58.4235	2.11e-14	1.74e-12
ENSG00000177084	POLE	8.8018	8.78584	8.77401	8.16624	8.20448	8.11858	8.13349	8.19482	8.19179	-0.618746	8.40552	58.3218	2.23e-14	1.81e-12
ENSG00000135362	PRR5L	6.26521	6.29793	6.32919	5.22023	5.30046	5.30517	5.57911	5.57114	5.58448	-0.863618	5.78289	58.0846	2.51e-14	2.03e-12
ENSG00000304480	ENSG00000304480	4.60025	4.75256	4.63091	3.38339	3.40798	3.17823	3.6624	3.80946	3.76737	-1.11369	4.02341	57.6046	3.2e-14	2.58e-12
ENSG00000170004	CHD3	9.81877	9.81568	9.82092	9.25842	9.24297	9.21774	9.13483	9.15692	9.17935	-0.619415	9.43632	57.552	3.29e-14	2.65e-12
ENSG00000099365	STX1B	2.70498	3.0399	2.84074	1.6536	1.38867	1.65223	1.46354	1.79815	1.98676	-1.21072	2.18717	57.1461	4.05e-14	3.21e-12
ENSG00000054654	SYNE2	4.2478	4.24444	4.27259	3.21085	3.24949	2.96266	3.50403	3.41973	3.31788	-0.970787	3.68607	56.9878	4.39e-14	3.46e-12
ENSG00000105429	MEGF8	5.54274	5.55127	5.62217	4.66341	4.81983	4.63086	4.87765	4.85092	4.91815	-0.776342	5.10426	56.9457	4.48e-14	3.52e-12
ENSG00000073605	GSDMB	2.68064	2.74849	2.89999	1.25951	1.3312	1.4903	1.5689	1.83808	1.81185	-1.22612	2.09051	56.4979	5.63e-14	4.38e-12
ENSG00000168781	PPIP5K1	5.49399	5.537	5.48724	4.72782	4.75684	4.57136	4.84235	4.81834	4.83799	-0.745342	5.05478	56.3344	6.11e-14	4.73e-12
ENSG00000274020	LINC01138	3.558	3.66183	3.44865	2.68355	2.46529	2.3129	2.58411	2.71852	2.68419	-0.982534	2.98503	56.2721	6.31e-14	4.87e-12
ENSG00000101417	PXMP4	4.33771	4.36589	4.1559	2.99054	3.02504	3.11752	3.51198	3.21657	3.45318	-1.06074	3.67615	55.4957	9.37e-14	7.08e-12
ENSG00000185100	ADSS1	4.31733	4.30132	4.42011	3.51576	3.49691	3.32392	2.89494	3.1515	3.0983	-1.08562	3.72115	55.4075	9.8e-14	7.38e-12
ENSG00000179532	DNHD1	5.36629	5.42158	5.37612	4.21662	4.24166	4.35315	4.66241	4.68892	4.41517	-0.947665	4.83023	54.9556	1.23e-13	9.24e-12
ENSG00000175287	PHYHD1	4.50089	4.32749	4.26134	3.40194	3.39401	3.28958	3.58162	3.62544	3.57078	-0.887216	3.84047	54.8855	1.28e-13	9.51e-12
ENSG00000111271	ACAD10	5.47925	5.47134	5.3709	4.5009	4.59046	4.6113	4.7173	4.72131	4.84052	-0.775082	4.97388	54.8242	1.32e-13	9.76e-12
ENSG00000149150	SLC43A1	4.44419	4.57335	4.62966	3.75296	3.86004	3.77242	3.72301	3.85494	3.63642	-0.78358	4.07908	54.6346	1.45e-13	1.07e-11
ENSG00000143850	PLEKHA6	4.75162	4.72875	4.81699	3.637	3.50732	3.78891	2.91106	2.96208	3.05968	-1.41638	3.98927	54.5349	1.53e-13	1.12e-11
ENSG00000101412	E2F1	7.65087	7.53728	7.56696	6.71054	6.57163	6.70403	6.90658	6.92339	6.94077	-0.786729	7.11158	54.4459	1.6e-13	1.17e-11
ENSG00000241878	PISD	7.63797	7.64138	7.62785	6.88614	6.79345	6.86089	6.4058	6.38278	6.44005	-0.990836	7.05546	54.2777	1.74e-13	1.27e-11
ENSG00000169710	FASN	10.6549	10.6893	10.6924	10.0853	9.96729	9.99393	10.0398	10.1424	10.1116	-0.620939	10.296	54.144	1.86e-13	1.36e-11
ENSG00000257337	TNS2-AS1	3.31086	3.1996	3.30886	1.69715	1.78946	1.78963	2.01163	2.4148	2.26095	-1.26491	2.56593	54.0862	1.92e-13	1.39e-11
ENSG00000172432	GTPBP2	7.44918	7.45161	7.40821	6.77394	6.74476	6.80727	6.86063	6.84177	6.86688	-0.620137	7.05402	53.9824	2.02e-13	1.46e-11
ENSG00000246982	BRPF3-AS1	3.06228	3.1086	2.93684	1.70571	2.1633	2.0982	1.49596	1.78186	1.72675	-1.19816	2.36064	53.9441	2.06e-13	1.49e-11
ENSG00000167508	MVD	6.24792	6.20881	6.25251	5.61363	5.55448	5.66692	5.53559	5.61835	5.51955	-0.651054	5.83669	53.934	2.07e-13	1.49e-11
ENSG00000184058	TBX1	5.80387	5.98362	5.91517	5.30852	5.23303	5.22338	5.12574	5.17711	5.20445	-0.690248	5.48131	53.9029	2.11e-13	1.51e-11
ENSG00000149499	EML3	6.65414	6.70448	6.70907	6.09023	6.08571	6.03448	6.04997	6.03394	6.11065	-0.622027	6.306	53.9085	2.1e-13	1.51e-11
ENSG00000180264	ADGRD2	2.88617	2.76561	2.74704	1.63581	1.8643	1.86931	1.92697	1.97334	1.69349	-0.975024	2.23145	53.3849	2.74e-13	1.95e-11
ENSG00000070915	SLC12A3	8.79438	8.8219	8.82198	6.53115	6.55478	6.50856	7.49873	7.47541	7.43949	-1.73643	7.90621	53.3615	2.77e-13	1.97e-11
ENSG00000167792	NDUFV1	8.21719	8.19049	8.16907	7.39446	7.33374	7.37706	7.56343	7.58392	7.61348	-0.710581	7.75946	53.3339	2.81e-13	1.99e-11
ENSG00000142784	WDTC1	5.60872	5.64039	5.52873	4.98311	4.88218	4.848	4.99194	4.84309	4.91575	-0.682272	5.17641	52.9205	3.47e-13	2.44e-11
ENSG00000168067	MAP4K2	5.57016	5.64387	5.55924	4.91281	4.99935	4.96778	4.85178	4.93435	4.86313	-0.669625	5.18154	52.6972	3.89e-13	2.72e-11
ENSG00000010219	DYRK4	1.81151	1.84457	1.76052	0.749027	0.864568	0.616822	0.396303	0.346609	0.260667	-1.26839	1.10157	52.419	4.48e-13	3.13e-11
ENSG00000184897	H1-10	5.73817	5.97352	5.91568	4.73515	4.62554	4.67033	4.98148	5.06209	5.16961	-0.991781	5.29896	52.3992	4.53e-13	3.15e-11
ENSG00000225218	ENSG00000225218	1.79346	2.29133	2.1222	0.698493	1.03263	0.74063	0.62851	0.846958	1.03759	-1.26653	1.38055	52.2457	4.9e-13	3.39e-11
ENSG00000232593	KANTR	4.25771	4.25357	4.20372	3.42543	3.5905	3.41436	3.13002	3.2904	3.35025	-0.867165	3.72259	52.2086	4.99e-13	3.45e-11
ENSG00000198198	SZT2	6.49716	6.51816	6.52774	5.9905	5.83901	5.87859	5.78228	5.82674	5.88068	-0.646959	6.1169	52.1095	5.25e-13	3.61e-11
ENSG00000198353	HOXC4	5.1449	5.20571	5.17664	4.61995	4.43	4.33502	4.4499	4.45595	4.44878	-0.717828	4.73946	51.9353	5.74e-13	3.92e-11
ENSG00000287136	ENSG00000287136	0.746458	0.44918	0.605799	-1.22686	-1.36125	-0.963779	-0.674334	-0.672795	-1.25606	-1.67801	-0.253188	51.8451	6.01e-13	4.06e-11
ENSG00000154265	ABCA5	2.91567	2.61317	2.57593	1.57174	1.65539	1.78963	1.14704	1.43124	1.53981	-1.18369	2.03978	51.8488	5.99e-13	4.06e-11
ENSG00000221978	CCNL2	6.86268	6.87465	6.89035	6.18581	6.13985	6.22599	6.24301	6.31222	6.32306	-0.636534	6.4843	51.6344	6.69e-13	4.51e-11
ENSG00000005206	SPPL2B	5.61644	5.63167	5.56383	4.95558	4.74478	4.93667	4.81691	4.96082	4.98838	-0.701953	5.17643	51.359	7.69e-13	5.15e-11
ENSG00000204603	LINC01257	4.33927	4.48567	4.3909	3.29546	3.50732	3.23046	3.63354	3.61858	3.64224	-0.912676	3.86736	51.2812	8e-13	5.33e-11
ENSG00000182310	SPACA6	2.74778	2.63197	2.66157	1.59955	1.66473	1.84587	1.83702	1.68882	1.36779	-1.01095	2.09381	50.7519	1.05e-12	6.95e-11
ENSG00000232211	ENSG00000232211	1.00352	1.4902	1.07111	-0.782115	-0.522829	-1.49139	-0.188772	-1.21072	-1.5426	-2.15218	0.180995	50.6455	1.11e-12	7.3e-11
ENSG00000266086	ENSG00000266086	3.02023	3.18057	3.20529	2.2586	1.96598	2.11791	2.42482	2.0365	2.11788	-0.982396	2.56446	50.617	1.12e-12	7.39e-11
ENSG00000169418	NPR1	8.74982	8.77015	8.79673	8.09762	8.06723	8.07849	8.16597	8.23548	8.245	-0.622361	8.38859	50.6039	1.13e-12	7.42e-11
ENSG00000114270	COL7A1	4.01847	4.10007	4.03462	3.16816	3.27714	3.31541	3.33808	3.04972	3.33595	-0.80381	3.56953	50.5248	1.18e-12	7.66e-11
ENSG00000198886	MT-ND4	13.738	13.879	13.9226	13.2002	13.3108	13.0509	12.9495	12.9614	12.9069	-0.77788	13.379	50.5258	1.18e-12	7.66e-11
ENSG00000306400	ENSG00000306400	2.8164	2.84427	2.84074	1.7966	1.94314	1.83797	1.90299	2.07043	2.05817	-0.903849	2.30142	50.5177	1.18e-12	7.67e-11
ENSG00000178188	SH2B1	6.08872	6.0335	5.96408	5.01873	5.04296	5.10494	5.34331	5.40093	5.31609	-0.817923	5.53899	50.4563	1.22e-12	7.9e-11
ENSG00000005486	RHBDD2	7.76855	7.80906	7.77301	7.23961	7.19727	7.22161	7.10092	7.19944	7.17565	-0.59401	7.41598	50.4035	1.25e-12	8.09e-11
ENSG00000174990	CA5A	8.0173	8.00583	7.99184	7.4328	7.42945	7.41456	7.17997	7.21469	7.2552	-0.680051	7.58893	50.1584	1.42e-12	9.15e-11
ENSG00000287885	ENSG00000287885	3.06228	3.14504	3.20193	2.36503	2.331	2.0715	2.01163	1.91479	2.18323	-0.98855	2.56119	50.1486	1.43e-12	9.17e-11
ENSG00000261474	ENSG00000261474	2.17426	2.5204	2.21845	1.27108	1.39989	1.26137	1.22648	1.0236	1.2809	-1.07904	1.69545	49.9348	1.59e-12	1.02e-10
ENSG00000141258	SGSM2	6.57085	6.53542	6.55334	6.00183	5.93665	5.99151	5.88583	5.8851	5.94744	-0.611442	6.17577	49.8872	1.63e-12	1.04e-10
ENSG00000065029	ZNF76	6.44682	6.43566	6.46746	5.86819	5.77418	5.89058	5.6103	5.71267	5.63206	-0.698187	6.02395	49.7038	1.79e-12	1.13e-10
ENSG00000274276	ENSG00000274276	1.36293	1.75311	2.08621	-0.442654	-0.218244	-0.1435	0.463428	0.182569	0.431756	-1.72284	0.875178	48.9827	2.58e-12	1.61e-10
ENSG00000160191	PDE9A	4.90024	4.95828	4.87298	4.17718	4.09571	3.9733	4.12314	4.15446	4.36149	-0.760936	4.45144	48.9045	2.69e-12	1.67e-10
ENSG00000134574	DDB2	7.02444	7.00539	7.01116	6.17815	6.22751	6.17242	6.45714	6.42895	6.37555	-0.702636	6.58522	48.867	2.74e-12	1.7e-10
ENSG00000146830	GIGYF1	7.23065	7.17336	7.19771	6.50352	6.48995	6.47584	6.04084	6.09826	6.11798	-0.898927	6.66733	48.7027	2.98e-12	1.84e-10
ENSG00000168591	TMUB2	5.93001	5.98955	6.01904	5.44825	5.40094	5.30373	5.2545	5.29228	5.26135	-0.651656	5.57989	48.2946	3.67e-12	2.25e-10
ENSG00000130193	THEM6	7.08179	7.13105	7.11372	6.31582	6.42379	6.38456	6.51365	6.53177	6.57437	-0.64926	6.71022	48.2758	3.7e-12	2.26e-10
ENSG00000130702	LAMA5	9.19503	9.2213	9.23923	8.64015	8.51573	8.56151	8.18909	8.2691	8.28089	-0.799295	8.73753	48.2268	3.8e-12	2.31e-10
ENSG00000225180	PVALEF	0.409947	0.787656	0.625994	-0.830767	-0.703213	-0.578294	-1.12197	-1.27743	-1.17193	-1.60962	-0.213559	48.1792	3.89e-12	2.36e-10
ENSG00000188186	LAMTOR4	6.84307	6.81113	6.79686	6.27545	6.19405	6.27801	6.06715	6.15943	6.11118	-0.634269	6.42668	48.0394	4.18e-12	2.52e-10
ENSG00000289911	ENSG00000289911	1.89002	1.81198	1.71411	-0.333463	0.196508	-0.240539	0.419027	0.324286	0.787414	-1.60553	0.962304	47.9974	4.27e-12	2.56e-10
ENSG00000260423	LINC02367	-0.522805	-0.427528	-0.335648	-2.66857	-3.01875	-3.05764	-1.77441	-2.33809	-2.57963	-2.36383	-1.45874	47.6944	4.98e-12	2.95e-10
ENSG00000306132	ENSG00000306132	2.72416	2.48466	2.54444	1.70571	1.63654	1.58774	1.64797	1.48254	1.15626	-1.04666	1.98298	47.5446	5.38e-12	3.18e-10
ENSG00000161682	FAM171A2	3.63601	3.58916	3.64698	2.722	2.72829	2.84933	2.99664	2.84543	2.86433	-0.790671	3.14942	47.4742	5.57e-12	3.28e-10
ENSG00000133466	C1QTNF6	5.54813	5.52071	5.48102	4.50948	4.53427	4.59967	4.82544	4.84603	4.89882	-0.807375	5.03204	47.2674	6.19e-12	3.64e-10
ENSG00000159423	ALDH4A1	5.50304	5.53013	5.54473	4.85727	4.87013	4.85193	4.91609	4.99831	4.89151	-0.628306	5.13922	47.1579	6.55e-12	3.83e-10
ENSG00000073670	ADAM11	2.28172	1.91531	1.91623	0.165358	0.0331122	0.501526	0.506503	1.07798	0.632264	-1.54792	1.22366	47.015	7.04e-12	4.1e-10
ENSG00000131584	ACAP3	5.70175	5.71225	5.69866	5.17706	5.05544	5.08755	5.02472	5.11588	5.05099	-0.61847	5.32282	46.7879	7.91e-12	4.57e-10
ENSG00000187609	EXD3	4.44996	4.67426	4.69683	4.00767	3.70578	3.81731	3.54334	3.58376	3.73232	-0.872965	4.0921	46.6317	8.57e-12	4.92e-10
ENSG00000011465	DCN	3.95088	4.00235	3.88554	1.22422	1.73732	1.29638	2.36756	2.57464	2.4848	-1.90886	2.98082	46.5672	8.85e-12	5.07e-10
ENSG00000101958	GLRA2	0.765096	0.169405	0.704062	-1.5141	-2.02274	-2.33187	-0.773904	-1.49834	-1.5426	-2.23655	-0.47163	46.513	9.1e-12	5.2e-10
ENSG00000166866	MYO1A	2.32004	2.10885	2.45696	1.28256	0.958656	0.989133	1.27711	0.908274	1.44974	-1.16118	1.64471	46.2724	1.03e-11	5.84e-10
ENSG00000167969	ECI1	7.736	7.73222	7.73604	7.1648	7.09588	7.17337	7.1225	7.17995	7.24472	-0.570635	7.38048	46.2411	1.05e-11	5.92e-10
ENSG00000085465	OVGP1	2.62561	2.94915	2.51225	1.85928	1.72844	1.43899	1.39642	1.63542	1.65945	-1.08956	2.08369	46.2254	1.05e-11	5.94e-10
ENSG00000110074	FOXRED1	7.05434	7.0578	7.01068	6.50628	6.46746	6.51538	6.42837	6.44423	6.46284	-0.570185	6.68709	46.232	1.05e-11	5.94e-10
ENSG00000168899	VAMP5	2.45243	2.48982	2.54974	1.44464	1.34288	1.58774	1.80287	1.54179	1.44974	-0.9712	1.93155	46.0748	1.14e-11	6.39e-10
ENSG00000171443	ZNF524	3.01245	3.1483	2.89584	1.88963	1.74614	1.73963	2.01163	2.27631	2.14273	-1.05016	2.4165	46.0289	1.17e-11	6.53e-10
ENSG00000173175	ADCY5	0.955642	0.64692	0.899226	-0.405331	-0.481049	-0.711076	-0.411221	-0.503519	-0.198908	-1.3358	0.114809	46.0192	1.17e-11	6.55e-10
ENSG00000111653	ING4	5.02147	5.04673	5.03845	3.8116	3.8902	3.81731	4.31102	4.26113	4.27795	-0.959083	4.4721	45.6184	1.44e-11	7.97e-10
ENSG00000288993	ENSG00000288993	0.854838	0.787656	0.33844	-1.29348	-0.481049	-0.85733	-0.996381	-1.02731	-1.5426	-1.74625	-0.20479	45.5235	1.51e-11	8.34e-10
ENSG00000226328	NUP50-DT	4.59505	4.59267	4.53136	3.79566	3.77638	3.83131	3.96612	3.94548	3.9568	-0.6945	4.1501	45.4711	1.55e-11	8.55e-10
ENSG00000206262	FOXL2NB	3.36684	3.61063	3.45148	2.68787	2.50741	2.61518	2.82009	2.68825	2.58492	-0.82986	2.98459	45.376	1.63e-11	8.94e-10
ENSG00000100258	LMF2	7.16528	7.16753	7.15946	6.6218	6.53233	6.57393	6.51002	6.64107	6.63912	-0.577028	6.80618	45.3556	1.64e-11	9e-10
ENSG00000197774	EME2	2.72416	2.68242	2.75623	1.96994	1.80643	1.85372	1.46354	1.61717	1.47605	-1.0163	2.13121	45.309	1.68e-11	9.19e-10
ENSG00000133315	MACROD1	4.74811	4.70009	4.7484	4.14294	3.83545	4.13999	3.9545	3.92708	3.86519	-0.750339	4.27806	45.2197	1.76e-11	9.56e-10
ENSG00000134824	FADS2	7.5707	7.59409	7.5421	7.06154	7.04204	6.97244	6.81639	6.85277	6.86656	-0.630777	7.18061	45.1237	1.85e-11	1e-09
ENSG00000164120	HPGD	-0.522805	-0.466977	-0.638772	-3.07442	-3.59974	-3.05764	-4.58787	-2.33809	-2.37764	-2.92271	-1.6869	45.0409	1.93e-11	1.04e-09
ENSG00000196876	SCN8A	2.68554	2.72243	2.47377	1.78049	1.70148	1.83002	1.5689	1.77364	1.78053	-0.897752	2.10225	45.0074	1.96e-11	1.06e-09
ENSG00000198625	MDM4	5.50026	5.56844	5.46359	4.75486	4.83438	4.85683	5.00232	4.89418	4.84936	-0.644988	5.11527	44.6587	2.35e-11	1.25e-09
ENSG00000160298	C21orf58	5.91653	5.96937	5.88301	3.94583	3.93139	3.88788	4.83075	4.72983	4.81111	-1.50446	5.10874	44.5328	2.5e-11	1.33e-09
ENSG00000248791	ENSG00000248791	0.0331369	0.268815	0.156033	-1.22686	-1.15009	-2.33187	-1.67481	-1.85796	-1.90053	-1.92013	-0.772173	44.4711	2.58e-11	1.37e-09
ENSG00000179284	DAND5	0.233809	0.292632	0.543459	-3.07442	-2.28498	-2.64959	-1.41162	-1.34737	-1.5426	-2.47109	-0.732122	44.3951	2.68e-11	1.42e-09
ENSG00000224516	ECEL1P2	0.311944	0.00613244	0.237047	-1.36334	-1.02474	-1.27035	-1.99697	-1.5802	-1.90053	-1.77661	-0.693922	44.4	2.68e-11	1.42e-09
ENSG00000101079	NDRG3	6.80305	6.79481	6.85041	6.0446	6.11835	6.05209	6.19362	6.26209	6.31943	-0.648074	6.41822	44.3026	2.81e-11	1.48e-09
ENSG00000197324	LRP10	6.84937	6.87094	6.88565	6.35611	6.30307	6.27874	6.22459	6.31964	6.32804	-0.566675	6.51676	44.2009	2.96e-11	1.55e-09
ENSG00000135722	FBXL8	2.77102	2.95662	2.74704	2.05942	1.98846	1.99541	1.65756	1.74031	1.91163	-0.936025	2.27899	44.156	3.03e-11	1.59e-09
ENSG00000103197	TSC2	7.37888	7.44249	7.38081	6.88732	6.82449	6.86939	6.78475	6.87406	6.82174	-0.557083	7.05453	44.1456	3.05e-11	1.59e-09
ENSG00000103091	WDR59	6.11074	6.13251	6.13412	5.57271	5.59411	5.59081	5.49003	5.46483	5.50365	-0.589212	5.76101	44.0088	3.27e-11	1.7e-09
ENSG00000171119	NRTN	1.15253	1.31521	1.01095	-0.0481458	-0.909418	0.0872774	-0.493706	-0.425789	-0.749845	-1.58732	0.334502	43.8516	3.54e-11	1.84e-09
ENSG00000188263	IL17REL	0.608779	0.292632	0.778121	-1.87312	-1.02474	-1.75254	-0.880858	-1.21072	-0.749845	-1.87262	-0.353495	43.8377	3.57e-11	1.85e-09
ENSG00000126353	CCR7	0.233809	-0.113978	0.0404133	-3.07442	-2.28498	-1.34033	-2.41241	-1.85796	-1.7711	-2.28267	-0.975947	43.8043	3.63e-11	1.87e-09
ENSG00000107281	NPDC1	5.94337	5.94375	5.89606	5.42124	5.2013	5.31942	5.13434	5.02018	5.19557	-0.707321	5.49693	43.798	3.64e-11	1.88e-09
ENSG00000173715	TOP6BL	5.5065	5.52511	5.60001	4.89516	4.78494	4.87913	5.02287	4.96082	4.91454	-0.63371	5.15456	43.6702	3.89e-11	1.99e-09
ENSG00000265972	TXNIP	7.72072	7.72074	7.6957	6.43411	6.43815	6.41142	6.98006	6.9657	6.91516	-0.998037	7.12859	43.5703	4.09e-11	2.08e-09
ENSG00000075826	SEC31B	2.92398	2.70034	2.55501	0.515991	0.781185	1.42851	1.14704	1.68882	1.40935	-1.53572	1.91172	43.5357	4.16e-11	2.12e-09
ENSG00000205436	EXOC3L4	2.32004	2.48982	2.14337	1.18805	1.22161	1.37492	1.32602	1.36717	1.56455	-0.993964	1.74905	43.4996	4.24e-11	2.14e-09
ENSG00000233237	LINC00472	3.49519	3.51769	3.47115	2.59423	2.70586	2.71776	2.33208	2.2048	2.12621	-1.03209	2.89584	43.4847	4.27e-11	2.16e-09
ENSG00000148341	SH3GLB2	7.04293	7.07034	7.04343	6.39894	6.31312	6.34573	6.50472	6.52963	6.5315	-0.612645	6.67413	43.2943	4.71e-11	2.36e-09
ENSG00000306103	ENSG00000306103	5.26762	5.29021	5.23204	4.00767	4.06431	4.14641	4.51595	4.56707	4.50257	-0.946123	4.70644	43.0603	5.31e-11	2.66e-09
ENSG00000116133	DHCR24	9.94734	9.95075	9.93844	9.41659	9.3969	9.35719	9.42329	9.45611	9.45761	-0.527191	9.61626	42.9243	5.69e-11	2.84e-09
ENSG00000300114	ENSG00000300114	3.81661	3.96578	3.89389	3.14947	3.19576	2.9333	2.98527	2.64387	2.68982	-0.948158	3.33605	42.7302	6.28e-11	3.11e-09
ENSG00000070729	CNGB1	2.58423	2.56019	2.57593	1.71421	1.92771	1.46999	1.64797	1.62633	1.52728	-0.920841	2.03213	42.5844	6.77e-11	3.34e-09
ENSG00000162913	OBSCN-AS1	2.50328	2.92649	2.86643	1.42406	1.28352	1.73112	0.419027	0.749803	0.927486	-1.63793	1.91474	42.5439	6.91e-11	3.4e-09
ENSG00000256407	ENSG00000256407	1.5679	1.30354	1.61655	-0.0772004	0.617754	0.0603698	-0.411221	-0.248023	-0.423702	-1.56941	0.673247	42.5058	7.05e-11	3.46e-09
ENSG00000171877	FRMD5	3.14287	3.15806	3.22197	0.307013	0.0331122	0.688865	1.60898	1.58936	1.55223	-2.09686	2.14807	42.494	7.09e-11	3.47e-09
ENSG00000214279	SCART1	1.1383	1.46945	1.32691	-1.22686	-0.610204	-1.27035	-0.880858	-0.672795	0.290629	-2.02691	0.328583	42.4971	7.08e-11	3.47e-09
ENSG00000308375	ENSG00000308375	0.337076	0.406158	0.796057	-1.36334	-1.15009	-1.2036	-0.674334	-0.672795	-1.17193	-1.61836	-0.305938	42.4811	7.14e-11	3.48e-09
ENSG00000164062	APEH	8.55389	8.56688	8.52373	7.99939	8.00266	8.03973	8.01065	8.02593	8.05855	-0.525389	8.22009	42.4694	7.18e-11	3.49e-09
ENSG00000147421	HMBOX1	5.19388	5.21431	5.35888	4.61995	4.67489	4.602	4.6778	4.66802	4.61192	-0.615478	4.87799	42.4296	7.33e-11	3.56e-09
ENSG00000103056	SMPD3	0.386064	-0.113978	0.0100002	-1.87312	-1.15009	-2.07165	-1.67481	-1.42088	-1.5426	-1.83004	-0.790885	42.3725	7.54e-11	3.65e-09
ENSG00000235007	ENSG00000235007	2.81193	2.8722	2.78346	1.74773	1.8232	2.02354	2.01909	2.12955	2.00495	-0.866443	2.30971	42.1488	8.46e-11	4.09e-09
ENSG00000065361	ERBB3	3.71243	3.67548	3.78584	3.08864	2.83964	2.53926	2.79858	2.37735	2.63832	-0.997228	3.14343	41.8818	9.7e-11	4.67e-09
ENSG00000168268	NT5DC2	7.86917	7.87377	7.83546	7.36286	7.31478	7.37552	7.1666	7.20116	7.22449	-0.583138	7.49808	41.8522	9.84e-11	4.72e-09
ENSG00000177225	GATD1	6.38264	6.39842	6.38209	5.80938	5.7731	5.7482	5.82279	5.87073	5.89477	-0.567482	6.03542	41.8398	9.91e-11	4.74e-09
ENSG00000159792	PSKH1	4.86827	4.84606	4.7461	4.11913	3.86004	3.91442	4.15732	4.12731	4.2439	-0.746401	4.36939	41.7552	1.03e-10	4.93e-09
ENSG00000143382	ADAMTSL4	4.7029	4.73637	4.67033	4.09002	4.05547	3.95698	4.11272	4.14812	4.03632	-0.63669	4.31214	41.6302	1.1e-10	5.24e-09
ENSG00000165899	OTOGL	-1.20342	-1.05047	-1.37772	-3.07442	-3.59974	-3.05764	-3.58431	-4.58787	-3.44437	-2.96146	-2.29611	41.5913	1.12e-10	5.31e-09
ENSG00000130707	ASS1	11.076	11.032	11.0422	10.446	10.3945	10.4133	10.5547	10.5654	10.5644	-0.558638	10.7027	41.5717	1.14e-10	5.36e-09
ENSG00000182685	BRICD5	1.9564	1.7954	1.89974	0.905729	0.746433	0.930904	0.173873	0.571752	0.230071	-1.27718	1.1761	41.4816	1.19e-10	5.58e-09
ENSG00000298649	ENSG00000298649	3.785	3.88583	3.6445	2.76356	2.60762	2.64718	3.01912	3.00481	3.07697	-0.91502	3.23545	41.4238	1.23e-10	5.74e-09
ENSG00000175318	GRAMD2A	2.54162	2.67791	2.39946	1.40317	1.69238	1.36396	1.72294	1.34517	1.7485	-1.00067	1.96422	41.3757	1.26e-10	5.87e-09
ENSG00000096060	FKBP5	5.1315	5.04059	5.12614	3.64369	3.88422	3.65368	4.29728	4.24637	4.29837	-1.07027	4.48115	41.2927	1.31e-10	6.11e-09
ENSG00000132600	PRMT7	8.18164	8.19138	8.17818	7.59914	7.57967	7.60901	7.69886	7.67025	7.70723	-0.538984	7.84769	41.2239	1.36e-10	6.32e-09
ENSG00000073849	ST6GAL1	6.01666	6.04055	6.05486	5.44058	5.45978	5.38188	5.54917	5.50941	5.3802	-0.582919	5.67621	41.1697	1.4e-10	6.48e-09
ENSG00000255992	PUS1-AS1	2.57897	2.60368	2.71911	1.64473	1.7809	1.95945	1.81148	1.59869	1.82215	-0.869021	2.12087	41.0974	1.45e-10	6.71e-09
ENSG00000070371	CLTCL1	7.06848	7.07485	7.04084	6.51968	6.53073	6.54662	6.54369	6.55262	6.4612	-0.535496	6.72744	41.0369	1.49e-10	6.89e-09
ENSG00000125734	GPR108	7.40121	7.39961	7.39706	6.82807	6.87865	6.82811	6.63174	6.59665	6.50139	-0.681759	6.98225	40.9932	1.53e-10	7.04e-09
ENSG00000167113	COQ4	7.00178	7.0002	7.02192	6.49922	6.39953	6.3723	6.50903	6.49195	6.46531	-0.551055	6.66501	40.856	1.64e-10	7.5e-09
ENSG00000180902	D2HGDH	5.47854	5.4087	5.44381	4.83112	4.91091	4.8578	4.90708	4.7952	4.87059	-0.581971	5.08344	40.8373	1.65e-10	7.56e-09
ENSG00000233006	MIR3936HG	3.60789	3.71567	3.54725	2.4591	2.52802	2.50475	2.86629	2.81773	2.96994	-0.926705	3.0799	40.6023	1.87e-10	8.49e-09
ENSG00000143409	MINDY1	4.3624	4.59147	4.52331	3.65919	3.75687	3.68924	3.99098	3.72678	3.73232	-0.734135	4.05067	40.5887	1.88e-10	8.54e-09
ENSG00000181274	FRAT2	6.0574	6.15217	6.0516	5.539	5.42518	5.44435	5.58979	5.53089	5.51241	-0.580251	5.72818	40.567	1.9e-10	8.62e-09
ENSG00000177169	ULK1	7.27298	7.27829	7.33131	6.84245	6.72788	6.77402	6.63993	6.68745	6.7246	-0.560421	6.94601	40.5459	1.92e-10	8.7e-09
ENSG00000004399	PLXND1	8.27969	8.3412	8.34747	7.83245	7.78597	7.82198	7.77652	7.80217	7.81939	-0.516638	8.00002	40.4013	2.07e-10	9.33e-09
ENSG00000143198	MGST3	8.24536	8.19217	8.17305	7.72479	7.60686	7.69051	7.65825	7.67618	7.70845	-0.52593	7.87535	40.1277	2.38e-10	1.07e-08
ENSG00000108556	CHRNE	2.68064	2.67338	2.34567	1.56235	1.646	1.50034	1.67654	1.87695	1.48903	-0.951024	2.01843	40.0763	2.44e-10	1.09e-08
ENSG00000108469	RECQL5	6.01715	5.97812	6.04271	5.38441	5.41207	5.37097	5.4143	5.49512	5.54074	-0.575974	5.65578	39.9319	2.63e-10	1.17e-08
ENSG00000050426	LETMD1	7.03408	6.99952	6.9353	6.45678	6.48667	6.46946	6.42487	6.48442	6.3968	-0.536794	6.65543	39.8475	2.75e-10	1.22e-08
ENSG00000160445	ZER1	5.67551	5.715	5.73223	5.1206	5.16886	5.09503	5.12487	5.22082	5.14317	-0.562164	5.35855	39.4019	3.45e-10	1.52e-08
ENSG00000160285	LSS	3.03566	2.70921	3.04579	2.18097	1.91994	1.87704	2.19397	2.0227	2.10107	-0.890163	2.41174	39.3636	3.52e-10	1.55e-08
ENSG00000104964	TLE5	8.65158	8.66978	8.69421	8.14596	8.06028	8.1103	8.13917	8.21259	8.20032	-0.526352	8.34322	39.3104	3.62e-10	1.59e-08
ENSG00000165879	FRAT1	1.45764	1.77017	1.66616	0.165358	0.170528	0.501526	0.506503	0.846958	0.484555	-1.19617	0.96795	39.1203	3.98e-10	1.74e-08
ENSG00000165995	CACNB2	2.73365	2.82399	3.11172	1.78857	1.96598	1.41795	2.11267	1.96615	1.82215	-1.04586	2.29467	39.0298	4.17e-10	1.82e-08
ENSG00000248367	ENSG00000248367	2.52531	2.58933	2.47933	1.78049	1.43305	1.26137	1.174	0.995622	1.65945	-1.13588	1.88596	38.9418	4.37e-10	1.89e-08
ENSG00000197530	MIB2	5.1252	5.08303	5.2004	4.56106	4.50208	4.44833	4.45128	4.63439	4.56978	-0.608471	4.76147	38.8562	4.56e-10	1.96e-08
ENSG00000107902	LHPP	4.91804	4.98867	4.90226	4.41483	4.34254	4.29519	4.3034	4.38223	4.20116	-0.612443	4.55893	38.7359	4.85e-10	2.09e-08
ENSG00000127419	TMEM175	4.06997	4.10512	4.14019	2.85484	2.85604	2.97712	3.4554	3.31608	3.31424	-0.960369	3.54191	38.7197	4.89e-10	2.1e-08
ENSG00000118418	HMGN3	5.23457	5.174	5.29094	4.45217	4.44904	4.35315	4.55623	4.66691	4.73143	-0.694586	4.81038	38.68	4.99e-10	2.14e-08
ENSG00000074855	ANO8	4.19895	4.43574	4.33985	3.52546	3.60026	3.67157	3.04857	3.37428	3.42306	-0.876168	3.80753	38.5807	5.25e-10	2.24e-08
ENSG00000172006	ZNF554	3.58185	3.59156	3.52592	2.48418	2.43287	2.73488	2.67659	2.9143	2.91329	-0.867178	3.05185	38.4827	5.52e-10	2.35e-08
ENSG00000065325	GLP2R	8.37993	8.38505	8.35126	7.72991	7.80852	7.81633	7.90746	7.91278	7.85429	-0.532673	8.03975	38.3377	5.95e-10	2.52e-08
ENSG00000118946	PCDH17	4.11788	4.1135	4.25811	3.35648	3.40241	3.5869	3.53816	3.50408	3.53993	-0.676628	3.75149	38.3153	6.02e-10	2.55e-08
ENSG00000008710	PKD1	6.28027	6.38012	6.28978	5.85816	5.70686	5.8116	5.59915	5.65347	5.64081	-0.60291	5.94477	38.254	6.21e-10	2.62e-08
ENSG00000309568	ENSG00000309568	0.765096	0.869118	0.500351	-0.36895	-0.802634	-1.49139	-0.493706	-1.08589	-0.877295	-1.59478	-0.106656	38.244	6.24e-10	2.63e-08
ENSG00000204991	SPIRE2	6.49437	6.48818	6.40382	5.97245	5.89957	5.91096	5.62075	5.72817	5.7303	-0.647169	6.06504	38.2439	6.24e-10	2.63e-08
ENSG00000241973	PI4KA	7.67479	7.64355	7.67692	7.0746	7.08701	7.03899	7.12012	7.20689	7.21427	-0.5402	7.32844	38.2243	6.31e-10	2.65e-08
ENSG00000138688	BLTP1	3.22595	3.37996	3.3182	2.52342	2.62207	2.50973	2.42482	2.73976	2.44539	-0.764248	2.84894	38.1638	6.5e-10	2.73e-08
ENSG00000166816	LDHD	1.42284	1.91531	1.90801	-0.602423	0.0331122	0.139632	0.568796	0.645629	0.290629	-1.56705	0.937918	38.1001	6.72e-10	2.8e-08
ENSG00000150893	FREM2	-0.478282	0.59039	-0.29711	-4.58787	-3.01875	-4.03001	-1.99697	-3.63254	-2.81458	-3.67607	-1.27091	38.0247	6.99e-10	2.9e-08
ENSG00000197043	ANXA6	8.30469	8.29837	8.30905	7.86289	7.81299	7.80941	7.77707	7.77285	7.77089	-0.502708	7.98907	37.9167	7.38e-10	3.06e-08
ENSG00000295044	ENSG00000295044	2.0276	1.94567	2.13635	1.01988	0.848273	1.37492	1.00406	1.07798	0.808276	-1.0143	1.45167	37.8481	7.65e-10	3.15e-08
ENSG00000295911	ENSG00000295911	2.91567	2.91886	3.0001	2.28738	1.89635	2.26067	2.17407	2.0637	2.12621	-0.80973	2.46109	37.8536	7.63e-10	3.15e-08
ENSG00000167363	FN3K	1.72847	1.62763	1.68553	0.715535	0.710824	0.501526	0.878519	0.207176	0.678321	-1.07179	1.06904	37.8323	7.71e-10	3.18e-08
ENSG00000214193	SH3D21	3.47552	3.47409	3.53929	2.92612	2.80206	2.86108	2.67659	2.64387	2.67286	-0.73114	3.05356	37.7422	8.07e-10	3.32e-08
ENSG00000139428	MMAB	6.0152	5.97766	5.99206	4.94929	5.0757	4.98487	5.34108	5.42473	5.38715	-0.789004	5.51983	37.689	8.3e-10	3.4e-08
ENSG00000197119	SLC25A29	5.26926	5.23673	5.32685	4.80847	4.72595	4.61477	4.48263	4.51874	4.50736	-0.663704	4.8713	37.5608	8.86e-10	3.6e-08
ENSG00000198208	RPS6KL1	4.07184	4.2089	4.0459	3.38606	3.4052	3.40101	3.61398	3.27011	3.3538	-0.704102	3.68242	37.5044	9.12e-10	3.7e-08
ENSG00000289222	ENSG00000289222	1.28758	1.63697	1.71411	0.351301	-0.0870985	0.419203	0.301651	-0.718411	0.16686	-1.47324	0.768699	37.4863	9.21e-10	3.73e-08
ENSG00000101188	NTSR1	1.42284	2.06111	2.00372	0.114871	-0.0257415	0.460952	0.463428	0.533344	0.96513	-1.43552	1.08131	37.4723	9.27e-10	3.75e-08
ENSG00000128311	TST	6.24792	6.22824	6.24191	5.73768	5.68695	5.73709	5.67604	5.71375	5.7439	-0.523587	5.91238	37.439	9.43e-10	3.81e-08
ENSG00000160447	PKN3	7.12233	7.20723	7.18223	6.68481	6.68178	6.65513	6.43292	6.5275	6.48326	-0.590078	6.80561	37.4165	9.54e-10	3.85e-08
ENSG00000167964	RAB26	2.42339	2.36057	2.67618	0.284349	0.0331122	0.165114	1.30177	0.981426	1.2809	-1.75073	1.58769	37.2307	1.05e-09	4.2e-08
ENSG00000100307	CBX7	3.73624	3.67094	3.75866	2.98352	3.01777	2.81755	3.0376	3.11944	3.12765	-0.704988	3.29399	37.1841	1.07e-09	4.29e-08
ENSG00000110921	MVK	5.35634	5.29979	5.37164	4.57163	4.49947	4.51302	4.75239	4.81334	4.80981	-0.67787	4.92852	37.083	1.13e-09	4.5e-08
ENSG00000232434	AJM1	2.88617	2.97882	2.87067	2.15622	1.98846	1.85372	1.28949	1.37805	1.70466	-1.15957	2.25404	36.9139	1.23e-09	4.87e-08
ENSG00000130522	JUND	5.48277	5.67195	5.72581	4.80648	4.53808	4.56419	4.93592	4.90457	5.07701	-0.814414	5.14193	36.9125	1.24e-09	4.87e-08
ENSG00000291068	ENSG00000291068	3.49519	3.32038	3.5446	2.46415	2.79783	2.49473	2.84966	2.67508	2.52316	-0.817935	2.96697	36.8236	1.29e-09	5.07e-08
ENSG00000295083	ENSG00000295083	0.872136	0.837083	0.33844	-0.881116	-0.325071	-0.909573	-0.937463	-0.585676	-0.473193	-1.43045	-0.0586611	36.7399	1.35e-09	5.27e-08
ENSG00000117266	CDK18	5.05877	4.98502	5.08113	4.09328	4.39537	4.17804	4.47993	4.45338	4.40151	-0.702911	4.61403	36.7167	1.37e-09	5.33e-08
ENSG00000249115	HAUS5	5.81117	5.67422	5.75419	4.96363	5.15816	5.02195	5.16995	5.2102	5.24614	-0.616597	5.36741	36.6922	1.38e-09	5.39e-08
ENSG00000234072	GTF3C2-AS2	3.73151	3.57223	3.63955	3.001	2.89225	2.87272	2.42482	2.50688	2.51049	-0.932768	3.09969	36.6848	1.39e-09	5.4e-08
ENSG00000281809	LINC01394	3.06228	3.32904	3.38786	2.63511	2.03959	2.43314	2.22654	2.37735	2.36318	-0.913968	2.72768	36.6827	1.39e-09	5.4e-08
ENSG00000256433	ENSG00000256433	2.82974	2.80755	2.7238	1.91935	1.91994	1.90756	1.52767	1.11746	1.60087	-1.10299	2.15609	36.6691	1.4e-09	5.43e-08
ENSG00000294983	ENSG00000294983	0.608779	0.753738	0.410066	-1.5141	-2.02274	-1.34033	-1.77441	-0.765516	-3.44437	-2.33466	-0.464728	36.6502	1.41e-09	5.47e-08
ENSG00000309294	ENSG00000309294	-0.478282	0.143444	0.386584	-2.66857	-2.02274	-1.85127	-2.41241	-1.21072	-2.20049	-2.22419	-0.95466	36.4172	1.59e-09	6.15e-08
ENSG00000189339	SLC35E2B	5.66749	5.537	5.66245	4.7975	4.6772	4.79186	5.00514	5.08468	5.07163	-0.7115	5.19046	36.3764	1.63e-09	6.27e-08
ENSG00000173269	MMRN2	4.52706	4.37707	4.39679	3.93313	3.78283	3.80925	3.62868	3.59079	3.72685	-0.686548	4.01602	36.1946	1.79e-09	6.81e-08
ENSG00000166436	TRIM66	5.08033	5.07961	5.1083	4.52527	4.60022	4.39951	4.52907	4.55034	4.48486	-0.574004	4.73355	36.1071	1.87e-09	7.1e-08
ENSG00000184343	SRPK3	1.66041	1.89211	1.84909	0.935126	1.06119	0.790603	0.527567	0.473745	0.608673	-1.07122	1.19186	35.9617	2.01e-09	7.59e-08
ENSG00000228873	ENSG00000228873	4.05679	4.00054	3.96894	3.05221	2.78504	2.81353	3.47179	3.12913	3.20048	-0.91841	3.46713	35.7918	2.2e-09	8.26e-08
ENSG00000178467	P4HTM	4.60284	4.75898	4.52734	3.8925	4.00491	4.01419	3.51725	3.83929	3.61586	-0.808116	4.14787	35.7602	2.23e-09	8.38e-08
ENSG00000170190	SLC16A5	5.55149	5.57149	5.61524	4.8886	4.68295	4.86268	5.01729	5.10365	4.96883	-0.653696	5.17857	35.7489	2.24e-09	8.42e-08
ENSG00000164620	RELL2	1.78435	2.02602	2.13635	0.935126	1.06119	1.07229	0.568796	1.09126	1.12334	-1.01818	1.4025	35.6148	2.4e-09	8.99e-08
ENSG00000114841	DNAH1	3.35766	3.32616	3.21532	1.45483	1.47611	1.57828	2.29571	2.39887	2.23036	-1.34866	2.55547	35.5388	2.5e-09	9.31e-08
ENSG00000093009	CDC45	7.37035	7.36545	7.34699	6.64339	6.66035	6.66577	6.85048	6.85958	6.92564	-0.589253	6.99609	35.4574	2.61e-09	9.68e-08
ENSG00000162496	DHRS3	5.48207	5.583	5.57621	4.56694	4.61113	4.77954	4.96517	4.96533	4.98036	-0.727576	5.10602	35.4494	2.62e-09	9.71e-08
ENSG00000250571	GLI4	1.75668	1.36099	1.75136	0.765485	0.710824	0.540991	0.301651	0.590579	0.655477	-1.05049	1.03136	35.4313	2.64e-09	9.79e-08
ENSG00000196961	AP2A1	7.0727	7.04207	7.00756	6.6096	6.51662	6.52679	6.54046	6.48253	6.54165	-0.504408	6.72512	35.3299	2.78e-09	1.03e-07
ENSG00000164458	TBXT	-1.52705	-1.1756	-1.37772	-3.07442	-4.58787	-4.58787	-4.58787	-3.63254	-4.58787	-3.93884	-2.54746	35.1565	3.04e-09	1.11e-07
ENSG00000166987	MBD6	6.20462	6.27719	6.25656	5.74703	5.67776	5.70434	5.65466	5.73241	5.80745	-0.525479	5.91842	35.1088	3.12e-09	1.13e-07
ENSG00000100271	TTLL1	2.1461	2.55035	2.30867	1.44464	1.2089	1.55919	1.41914	1.53208	1.52728	-0.902558	1.81482	34.9866	3.32e-09	1.2e-07
ENSG00000197565	COL4A6	4.64873	4.79591	4.68003	3.26684	3.32797	3.33519	3.95645	3.89904	3.93799	-1.0588	4.09668	34.916	3.44e-09	1.25e-07
ENSG00000116991	SIPA1L2	6.48948	6.46413	6.37391	5.81334	5.77418	5.77638	5.9477	5.93797	5.99599	-0.566873	6.0914	34.7368	3.77e-09	1.35e-07
ENSG00000136378	ADAMTS7	0.689054	0.470219	0.932039	-0.689473	-1.28738	-0.274392	-0.674334	-1.34737	-0.749845	-1.564	-0.107691	34.7166	3.81e-09	1.37e-07
ENSG00000116151	MORN1	4.56744	4.58907	4.50843	3.83907	3.79563	3.93493	3.85802	4.12893	3.86768	-0.648186	4.15762	34.6079	4.03e-09	1.44e-07
ENSG00000130052	STARD8	5.46007	5.44236	5.46008	4.89048	4.97517	4.90299	4.63477	4.60922	4.68565	-0.664419	5.04702	34.5123	4.24e-09	1.51e-07
ENSG00000125967	NECAB3	6.94161	6.9229	6.9519	6.48407	6.39288	6.4863	6.18494	6.26758	6.27937	-0.585292	6.57615	34.4451	4.38e-09	1.55e-07
ENSG00000196187	TMEM63A	6.61486	6.57055	6.5827	6.06178	6.12217	6.15066	6.0159	6.08213	6.055	-0.507701	6.27167	34.4562	4.36e-09	1.55e-07
ENSG00000163701	IL17RE	1.9564	2.142	2.02669	1.06047	0.476465	1.18868	0.22635	0.411577	0.927486	-1.30445	1.32287	34.431	4.42e-09	1.56e-07
ENSG00000196365	LONP1	9.76049	9.74056	9.75178	9.34182	9.25991	9.32165	9.16356	9.20023	9.18335	-0.504272	9.43506	34.3836	4.53e-09	1.6e-07
ENSG00000231412	LINC03078	4.16426	4.44772	4.54203	2.36503	2.80629	2.53438	3.2834	3.50408	3.34312	-1.36371	3.63961	34.3135	4.69e-09	1.66e-07
ENSG00000177854	TMEM187	4.55143	4.49981	4.40266	2.65733	2.8147	2.86497	3.46907	3.58611	3.63933	-1.26361	3.77649	34.2993	4.73e-09	1.67e-07
ENSG00000155254	MARVELD1	6.82348	6.75786	6.79825	6.07999	6.03397	6.11433	6.29959	6.34239	6.2803	-0.597108	6.42411	34.2961	4.73e-09	1.67e-07
ENSG00000108602	ALDH3A1	4.8156	4.76644	4.84633	4.18637	4.19731	4.05735	3.74566	3.72678	3.58898	-0.873805	4.28991	34.2817	4.77e-09	1.68e-07
ENSG00000131069	ACSS2	5.99314	6.08854	6.12217	5.31623	5.28994	5.24071	5.48466	5.57469	5.58372	-0.648151	5.67099	34.2784	4.78e-09	1.68e-07
ENSG00000110911	SLC11A2	7.14808	7.15052	7.10722	6.18428	6.2338	6.20195	6.53786	6.58906	6.62192	-0.728505	6.69275	34.2426	4.87e-09	1.71e-07
ENSG00000173064	HECTD4	6.74085	6.79871	6.7868	6.13723	6.19325	6.0825	6.33438	6.30048	6.27469	-0.552796	6.43175	34.2193	4.92e-09	1.72e-07
ENSG00000089820	ARHGAP4	5.60484	5.51692	5.54274	4.4686	4.27557	4.48925	4.90305	4.89418	4.89639	-0.880419	5.03188	34.1458	5.11e-09	1.78e-07
ENSG00000176884	GRIN1	2.2155	2.4427	2.44564	0.860479	1.22161	0.635172	1.27711	1.39956	1.60087	-1.18914	1.70165	34.112	5.2e-09	1.81e-07
ENSG00000167632	TRAPPC9	6.33158	6.36827	6.3012	5.12619	5.10857	5.1503	5.55815	5.74349	5.67387	-0.915931	5.79195	34.0882	5.27e-09	1.83e-07
ENSG00000100162	CENPM	6.3969	6.40697	6.37055	5.6699	5.65744	5.67637	5.82545	5.93198	5.94097	-0.603301	6.0188	34.0765	5.3e-09	1.84e-07
ENSG00000013573	DDX11	7.61728	7.59484	7.60132	7.08591	7.1434	7.13339	7.09344	7.16981	7.12224	-0.479631	7.30312	34.0396	5.4e-09	1.87e-07
ENSG00000174652	ZNF266	5.1696	5.31732	5.25005	4.53969	4.67142	4.44573	4.76797	4.6569	4.69688	-0.614513	4.86814	33.8509	5.95e-09	2.05e-07
ENSG00000256092	SBNO1-AS1	1.5248	1.30354	1.57561	0.165358	0.366338	0.560325	0.568796	0.278576	0.722953	-1.04256	0.875834	33.7826	6.16e-09	2.12e-07
ENSG00000090565	RAB11FIP3	2.88191	2.89183	2.67618	2.2586	2.03239	2.08491	1.90299	1.8922	1.93078	-0.801876	2.34013	33.7676	6.21e-09	2.13e-07
ENSG00000179029	TMEM107	2.32004	2.39399	2.36983	1.18805	1.45474	1.01739	1.60898	1.59869	1.53981	-0.95643	1.80373	33.6025	6.76e-09	2.31e-07
ENSG00000187240	DYNC2H1	2.50328	2.25542	2.55501	1.56235	1.72844	1.68783	1.64797	1.66237	1.35366	-0.836085	1.94543	33.4399	7.35e-09	2.49e-07
ENSG00000158793	NIT1	5.90922	5.87294	5.88406	5.35481	5.31165	5.3846	5.34257	5.42473	5.43236	-0.513543	5.56774	33.4448	7.33e-09	2.49e-07
ENSG00000181035	SLC25A42	3.0241	3.18057	3.22529	2.01193	2.62207	2.30719	1.91102	2.01575	2.1095	-0.96811	2.57974	33.4261	7.4e-09	2.51e-07
ENSG00000121753	ADGRB2	6.29638	6.25273	6.2517	5.80242	5.58983	5.74187	5.34034	5.38552	5.38801	-0.714346	5.83215	33.3668	7.63e-09	2.57e-07
ENSG00000185168	LINC00482	1.68997	2.27946	2.02669	0.79785	1.19608	0.822981	0.740999	0.645629	1.18844	-1.12475	1.38132	33.3178	7.83e-09	2.63e-07
ENSG00000197858	GPAA1	7.61247	7.63455	7.58448	7.1543	7.08701	7.18996	6.92282	7.04995	7.08024	-0.527566	7.28121	33.3133	7.84e-09	2.64e-07
ENSG00000272438	ENSG00000272438	3.85191	3.80533	3.94301	2.4591	2.26502	2.24283	3.05946	3.0429	2.95599	-1.15929	3.20734	33.2314	8.18e-09	2.74e-07
ENSG00000272822	ENSG00000272822	4.32049	4.28211	4.32449	3.69614	3.5658	3.5869	3.72072	3.79127	3.79637	-0.615476	3.93013	33.1895	8.36e-09	2.79e-07
ENSG00000172053	QARS1	8.59337	8.56015	8.58691	8.09029	8.08461	8.0685	8.10706	8.16422	8.14335	-0.470214	8.28436	33.1237	8.65e-09	2.88e-07
ENSG00000064547	LPAR2	2.81193	2.73117	2.87911	1.6536	1.89635	2.17546	1.43037	1.89977	1.99588	-0.955187	2.24952	33.1056	8.73e-09	2.9e-07
ENSG00000299022	ENSG00000299022	3.26903	3.6318	3.34281	2.65733	2.69679	2.73913	2.42482	2.40951	2.15907	-0.897718	2.8925	33.0905	8.8e-09	2.91e-07
ENSG00000100982	PCIF1	6.4125	6.41919	6.3895	5.97245	5.88217	5.96591	5.7524	5.83515	5.77602	-0.540689	6.07009	33.0858	8.82e-09	2.91e-07
ENSG00000125730	C3	8.52752	8.53259	8.53553	5.87532	5.84261	5.73603	7.19197	7.14714	7.1749	-1.88407	7.57167	33.083	8.83e-09	2.92e-07
ENSG00000167131	CCDC103	2.57369	2.70478	2.85365	1.93399	1.88841	1.93744	1.88677	2.12955	1.96834	-0.761211	2.25748	33.0758	8.86e-09	2.92e-07
ENSG00000164050	PLXNB1	6.12569	6.12133	6.06646	5.64787	5.51824	5.5996	5.56899	5.66128	5.4908	-0.522378	5.77835	32.9364	9.52e-09	3.14e-07
ENSG00000130518	IQCN	2.57897	2.84427	2.62692	1.47498	1.60779	1.86931	2.10568	1.74031	1.76993	-0.921995	2.1469	32.913	9.64e-09	3.17e-07
ENSG00000072310	SREBF1	8.57054	8.60713	8.58859	7.89585	7.79557	7.79736	8.03958	8.13024	8.14335	-0.614695	8.20941	32.842	1e-08	3.28e-07
ENSG00000079462	PAFAH1B3	5.79822	5.74337	5.87565	5.34457	5.20531	5.29366	4.96227	5.19951	5.15645	-0.608437	5.43098	32.7448	1.05e-08	3.43e-07
ENSG00000108821	COL1A1	7.54801	7.46804	7.49037	7.08714	7.02606	7.02666	6.93396	6.99205	7.0245	-0.486844	7.1969	32.7173	1.07e-08	3.48e-07
ENSG00000267489	LINC01837	-1.35618	-2.62667	-2.55386	-4.58787	-4.58787	-4.58787	-4.58787	-4.58787	-4.58787	-6.27628	-3.23091	32.6941	1.08e-08	3.51e-07
ENSG00000170791	CHCHD7	6.11211	6.15217	6.07933	5.40163	5.49488	5.4108	5.67191	5.58471	5.6524	-0.575476	5.75804	32.5754	1.15e-08	3.7e-07
ENSG00000013619	MAMLD1	6.586	6.60752	6.58721	5.8074	5.80933	5.72054	6.0676	6.14796	6.0446	-0.652355	6.19313	32.4166	1.24e-08	4.01e-07
ENSG00000138002	IFT172	5.11434	5.11511	5.18942	4.64685	4.62554	4.67144	4.54465	4.58596	4.49133	-0.544707	4.8008	32.3544	1.28e-08	4.13e-07
ENSG00000159958	TNFRSF13C	1.42284	1.10262	1.07111	-0.560792	-1.6087	-0.963779	-0.259178	0.157535	-0.375854	-1.76633	0.307808	32.1456	1.43e-08	4.58e-07
ENSG00000078814	MYH7B	0.179265	0.117007	0.0701985	-0.689473	-1.36125	-1.66014	-1.58164	-1.34737	-1.7711	-1.5642	-0.680439	32.1077	1.46e-08	4.66e-07
ENSG00000289288	ENSG00000289288	-0.393158	-0.549267	-0.591371	-3.33014	-2.14791	-2.482	-1.58164	-2.65541	-2.37764	-2.06918	-1.45767	31.9829	1.56e-08	4.94e-07
ENSG00000139445	FOXN4	1.28758	0.975951	1.64652	-1.10217	-0.151181	-1.2036	0.00391521	-0.585676	0.16686	-1.77715	0.421729	31.9531	1.58e-08	5.01e-07
ENSG00000163918	RFC4	6.49786	6.444	6.4481	5.80888	5.88117	5.82665	6.03395	5.99782	5.99996	-0.536465	6.12907	31.867	1.65e-08	5.22e-07
ENSG00000240498	CDKN2B-AS1	2.84296	2.8483	2.90413	1.72266	1.92771	2.07822	2.26468	2.21089	1.81185	-0.854072	2.35787	31.8533	1.66e-08	5.25e-07
ENSG00000167107	ACSF2	6.14094	6.15623	6.1297	4.35899	4.14491	4.1905	5.15564	5.17633	5.19359	-1.36364	5.38739	31.6497	1.85e-08	5.78e-07
ENSG00000100299	ARSA	5.36094	5.36021	5.32762	4.73828	4.70348	4.82521	4.8476	4.84112	4.91815	-0.536593	5.01542	31.5343	1.96e-08	6.12e-07
ENSG00000137171	KLC4	5.10431	5.08984	5.10561	4.66012	4.52148	4.59499	4.5979	4.53462	4.45541	-0.537985	4.76459	31.4992	2e-08	6.21e-07
ENSG00000126522	ASL	5.32763	5.35951	5.27743	4.71834	4.6327	4.61014	4.81263	4.92046	4.72046	-0.582892	4.9609	31.4804	2.01e-08	6.26e-07
ENSG00000170153	RNF150	4.08488	4.10175	4.10465	2.58962	2.98833	2.5682	3.2772	3.29328	3.37842	-1.04933	3.48927	31.4572	2.04e-08	6.33e-07
ENSG00000168487	BMP1	7.6968	7.67007	7.70092	7.1498	7.05697	7.04736	7.22721	7.24062	7.28341	-0.519129	7.36484	31.4465	2.05e-08	6.36e-07
ENSG00000287737	ENSG00000287737	2.26217	1.83649	1.98038	1.28256	1.27135	1.18868	1.00406	0.952609	0.96513	-0.928861	1.49249	31.3221	2.19e-08	6.73e-07
ENSG00000125652	ALKBH7	5.49049	5.35103	5.3679	4.97782	4.86102	4.90015	4.73212	4.8273	4.75848	-0.559455	5.05667	31.3254	2.18e-08	6.73e-07
ENSG00000164880	INTS1	8.72192	8.7736	8.79882	8.38582	8.26836	8.30831	8.19125	8.2948	8.26377	-0.478602	8.46431	31.2621	2.25e-08	6.91e-07
ENSG00000189269	DRICH1	0.649474	0.470219	0.831272	-0.735051	-1.36125	-0.963779	-0.880858	-0.425789	-0.198908	-1.43826	-0.107956	31.2464	2.27e-08	6.96e-07
ENSG00000171703	TCEA2	5.38072	5.31586	5.32299	4.91374	4.78065	4.86851	4.63112	4.65242	4.68706	-0.580873	4.98012	31.2267	2.3e-08	7.01e-07
ENSG00000123933	MXD4	6.82487	6.94444	6.90644	6.40978	6.362	6.41474	6.06084	6.14279	6.04295	-0.645117	6.49622	31.2043	2.32e-08	7.07e-07
ENSG00000185664	PMEL	1.9564	1.99005	1.98038	0.890803	1.03263	0.915972	1.46354	0.908274	0.96513	-0.945427	1.42445	31.1858	2.34e-08	7.12e-07
ENSG00000186815	TPCN1	7.7363	7.71594	7.73226	7.33556	7.25597	7.29125	7.1412	7.17392	7.23969	-0.487168	7.42235	31.1538	2.38e-08	7.21e-07
ENSG00000299581	ENSG00000299581	0.361778	-0.351726	-0.375243	-1.5141	-2.02274	-1.85127	-1.25953	-1.66698	-2.04273	-1.74491	-0.94583	31.0259	2.55e-08	7.69e-07
ENSG00000104960	PTOV1	3.88211	3.64804	3.73329	2.96938	3.11292	3.18135	2.76793	2.54116	2.83921	-0.842602	3.25486	30.967	2.62e-08	7.9e-07
ENSG00000025434	NR1H3	5.95458	5.99455	5.93756	5.22023	5.28994	5.25265	5.39437	5.53089	5.52507	-0.588943	5.59795	30.9613	2.63e-08	7.91e-07
ENSG00000102048	ASB9	4.78396	4.76219	4.60824	3.65257	3.68987	3.73036	4.16742	4.10948	4.07986	-0.801271	4.23894	30.9455	2.65e-08	7.96e-07
ENSG00000132635	PCED1A	5.75401	5.74498	5.74614	4.4836	4.56576	4.60083	5.08546	5.13043	5.09623	-0.895743	5.21694	30.9398	2.66e-08	7.97e-07
ENSG00000198723	SAXO5	1.87294	1.80371	2.25781	1.04707	0.578778	0.706327	1.22648	1.11746	0.722953	-1.08596	1.37109	30.9154	2.7e-08	8.06e-07
ENSG00000261706	LINC00165	1.82933	1.60878	1.67588	-0.298828	-0.802634	-0.112552	0.276985	0.301612	0.869112	-1.61713	0.857138	30.8822	2.74e-08	8.19e-07
ENSG00000187260	WDR86	0.889228	0.753738	1.02622	0.00826462	-0.362513	-0.0235017	-0.773904	-0.672795	-0.241151	-1.24762	0.206482	30.8306	2.82e-08	8.38e-07
ENSG00000177728	TMEM94	6.49193	6.49621	6.4594	6.10486	5.97045	5.98884	5.86011	5.98675	5.9303	-0.507306	6.165	30.7323	2.96e-08	8.77e-07
ENSG00000198929	NOS1AP	2.68064	2.89572	2.77444	1.39261	1.51792	1.43899	2.00414	2.04335	2.02291	-1.03199	2.18964	30.657	3.08e-08	9.09e-07
ENSG00000198478	SH3BGRL2	0.233809	0.470219	0.410066	-0.689473	-0.703213	-1.07871	-0.581195	-0.672795	-1.3454	-1.24606	-0.302848	30.6521	3.09e-08	9.1e-07
ENSG00000294743	ENSG00000294743	-1.43909	-1.46405	-1.15462	-3.64117	-3.01875	-3.05764	-4.58787	-3.63254	-2.81458	-2.61333	-2.36146	30.4615	3.41e-08	9.95e-07
ENSG00000290890	PDPR2P	3.85627	3.99511	4.01178	3.14319	3.03587	3.21529	3.49068	3.38511	3.19256	-0.70649	3.52647	30.4478	3.43e-08	9.99e-07
ENSG00000173992	CCS	5.52166	5.43301	5.38578	4.94116	4.99473	4.89825	4.94672	4.94628	4.93128	-0.505053	5.1318	30.4493	3.43e-08	9.99e-07
ENSG00000188818	ZDHHC11	5.38072	5.44568	5.37612	4.8716	4.89116	4.8617	4.89396	4.97253	4.90852	-0.501473	5.08727	30.416	3.49e-08	1.01e-06
ENSG00000233223	MPDU1-AS1	3.20562	3.29407	3.34281	2.05942	1.83151	2.18172	2.51195	2.58407	2.56667	-0.972474	2.71348	30.3935	3.53e-08	1.02e-06
ENSG00000197912	SPG7	7.50776	7.50547	7.49998	7.05549	7.08701	7.08748	6.89168	6.85715	6.92056	-0.518082	7.18048	30.3682	3.57e-08	1.03e-06
ENSG00000181754	AMIGO1	5.44209	5.45956	5.44595	4.54208	4.60992	4.54612	4.82651	5.00096	4.92413	-0.696997	5.0242	30.3612	3.59e-08	1.04e-06
ENSG00000143028	SYPL2	5.79822	5.75198	5.8746	5.34046	5.40164	5.27476	5.26316	5.22835	5.15848	-0.529388	5.47869	30.2999	3.7e-08	1.07e-06
ENSG00000135119	RNFT2	2.08807	2.32059	2.19836	1.04707	1.39989	1.2848	1.34987	1.62633	1.2809	-0.873984	1.69013	30.2422	3.81e-08	1.1e-06
ENSG00000128165	ADM2	2.79842	3.05738	3.06441	1.22422	1.13021	1.29638	2.11267	2.11011	1.87254	-1.30598	2.25292	30.2154	3.87e-08	1.11e-06
ENSG00000175309	PHYKPL	5.01369	5.01755	5.06735	4.4623	4.63389	4.52044	4.43744	4.50143	4.41687	-0.536367	4.69874	30.0883	4.13e-08	1.18e-06
ENSG00000310337	ENSG00000310337	2.07319	2.25542	2.1222	1.43439	1.55855	1.23755	1.26462	1.27707	1.42294	-0.792629	1.68003	30.0448	4.22e-08	1.21e-06
ENSG00000223813	PRR15-DT	3.60272	3.49734	3.51783	2.83158	2.62207	2.86885	3.04126	2.80167	2.96531	-0.682632	3.12405	30.0393	4.23e-08	1.21e-06
ENSG00000179111	HES7	5.26025	5.33104	5.21298	4.77634	4.70461	4.62054	4.28651	4.21789	4.40151	-0.753041	4.81315	29.947	4.44e-08	1.26e-06
ENSG00000126602	TRAP1	7.12414	7.14849	7.19834	6.77926	6.70543	6.70403	6.57564	6.58291	6.58688	-0.499573	6.8442	29.9172	4.51e-08	1.28e-06
ENSG00000172830	SSH3	5.88652	5.89401	5.79043	5.35481	5.30121	5.24146	4.81798	5.01235	4.84179	-0.747124	5.40499	29.8039	4.78e-08	1.35e-06
ENSG00000164896	FASTK	7.33939	7.31673	7.28285	6.87765	6.839	6.94213	6.72046	6.75941	6.78472	-0.490761	7.00524	29.7099	5.02e-08	1.41e-06
ENSG00000143126	CELSR2	8.36483	8.3636	8.3701	7.95635	7.97232	7.91866	7.75002	7.82657	7.85052	-0.485052	8.06157	29.7069	5.03e-08	1.41e-06
ENSG00000187741	FANCA	7.10552	7.07935	7.09278	6.67803	6.62192	6.64781	6.56804	6.67372	6.60711	-0.459392	6.80316	29.6662	5.13e-08	1.44e-06
ENSG00000123143	PKN1	7.71982	7.76558	7.76336	7.37464	7.30493	7.29918	7.14929	7.1598	7.11493	-0.51273	7.42891	29.6097	5.28e-08	1.48e-06
ENSG00000146278	PNRC1	5.97724	5.92815	5.86984	4.9165	4.93136	4.98755	5.41783	5.39358	5.31427	-0.749932	5.47158	29.5252	5.52e-08	1.54e-06
ENSG00000180815	MAP3K15	3.76662	3.75264	3.63208	3.001	3.14663	3.15298	3.19071	3.16097	3.10253	-0.593519	3.35207	29.3458	6.05e-08	1.67e-06
ENSG00000100983	GSS	7.54767	7.55231	7.54011	7.02804	7.01447	7.03619	7.13392	7.13957	7.13855	-0.464005	7.25458	29.2913	6.23e-08	1.72e-06
ENSG00000206530	CFAP44	2.33259	2.41584	2.22508	1.28256	1.41103	1.53007	1.13336	1.18096	1.81185	-0.930733	1.78223	29.2738	6.28e-08	1.73e-06
ENSG00000160183	TMPRSS3	5.1034	5.12426	5.24271	4.32052	4.15322	4.2393	4.67898	4.43136	4.66864	-0.730338	4.71492	29.0568	7.03e-08	1.93e-06
ENSG00000169071	ROR2	7.27461	7.31128	7.30082	6.82881	6.77066	6.81735	6.88685	6.88887	6.85251	-0.454377	7.00922	29.0531	7.04e-08	1.93e-06
ENSG00000085999	RAD54L	5.06348	5.15138	5.17407	4.56224	4.63032	4.59967	4.6942	4.64681	4.61932	-0.50522	4.81438	28.997	7.25e-08	1.98e-06
ENSG00000102878	HSF4	2.58946	2.77832	2.74242	2.05942	1.95079	2.07822	1.51718	1.67124	1.62459	-0.877159	2.18672	28.9304	7.5e-08	2.04e-06
ENSG00000143303	METTL25B	5.45291	5.36794	5.39316	5.0084	4.8671	4.8617	4.69885	4.90457	4.70803	-0.559651	5.05715	28.9203	7.54e-08	2.05e-06
ENSG00000120049	KCNIP2	-1.20342	-0.279708	-1.15462	-2.66857	-3.01875	-3.31511	-2.26024	-2.65541	-2.81458	-2.28202	-1.79156	28.9083	7.59e-08	2.06e-06
ENSG00000305254	ENSG00000305254	-1.0653	-0.991756	-1.37772	-3.07442	-3.59974	-2.83924	-2.77543	-2.33809	-3.09538	-2.12751	-2.05604	28.9023	7.61e-08	2.06e-06
ENSG00000275874	PICSAR	5.21437	5.16193	5.1672	3.80763	3.84779	3.77449	4.5199	4.44306	4.47348	-1.00029	4.59692	28.8801	7.7e-08	2.08e-06
ENSG00000160299	PCNT	7.10071	7.18414	7.11528	6.42863	6.4601	6.44951	6.64445	6.74214	6.69235	-0.559026	6.7863	28.8876	7.67e-08	2.08e-06
ENSG00000235888	LINC02940	-0.164322	0.490955	0.0701985	-1.22686	-1.43911	-1.2036	-1.18911	-0.765516	-1.3454	-1.41697	-0.583477	28.8013	8.02e-08	2.16e-06
ENSG00000236519	LINC01424	1.26156	1.33828	1.14294	0.0889486	0.247104	0.598234	0.276985	0.432598	0.0665253	-0.971633	0.689372	28.8077	7.99e-08	2.16e-06
ENSG00000142686	C1orf216	5.74816	5.72215	5.71819	5.19159	5.25483	5.16063	5.29882	5.27128	5.28759	-0.485135	5.42517	28.7981	8.03e-08	2.16e-06
ENSG00000188566	NDOR1	6.47292	6.3623	6.37652	5.99443	5.98264	5.89914	5.71329	5.74822	5.73439	-0.554676	6.05963	28.6989	8.46e-08	2.27e-06
ENSG00000198774	RASSF9	2.78478	2.88401	2.58627	1.99109	2.04674	2.18795	1.97376	2.0637	2.10107	-0.70041	2.33261	28.6816	8.53e-08	2.28e-06
ENSG00000196296	ATP2A1	1.90691	1.91531	1.65637	1.2002	0.692684	0.900884	0.828472	0.862533	1.12334	-0.90133	1.30321	28.6455	8.69e-08	2.32e-06
ENSG00000185420	SMYD3	5.02823	5.00228	4.98668	4.42134	4.34108	4.4842	4.48398	4.56707	4.56059	-0.528387	4.67636	28.5505	9.13e-08	2.43e-06
ENSG00000111077	TNS2	5.95255	5.94045	5.87196	5.05098	4.96576	5.08255	5.35882	5.42145	5.45238	-0.688019	5.50191	28.5343	9.21e-08	2.44e-06
ENSG00000013441	CLK1	4.08859	4.10344	4.13668	3.48875	3.51509	3.42758	3.05946	3.14832	2.80329	-0.847751	3.60384	28.4795	9.47e-08	2.51e-06
ENSG00000128272	ATF4	9.74993	9.77531	9.76539	9.23387	9.24424	9.2508	9.3724	9.3544	9.38445	-0.455492	9.47643	28.4624	9.55e-08	2.52e-06
ENSG00000141337	ARSG	5.48277	5.4005	5.34448	4.7682	4.84366	4.73663	4.90507	4.99478	4.95018	-0.541801	5.07302	28.4394	9.67e-08	2.55e-06
ENSG00000103051	COG4	6.98175	6.93902	6.89322	6.27617	6.2459	6.24104	6.49472	6.51923	6.50379	-0.55312	6.59432	28.2151	1.09e-07	2.85e-06
ENSG00000255284	GATD1-DT	3.03949	3.25823	3.02312	2.52825	2.37148	2.58718	2.27717	2.21089	2.35612	-0.720497	2.67489	28.1975	1.1e-07	2.87e-06
ENSG00000227764	NTRAS	2.23569	1.90762	2.14337	0.591784	1.2342	0.915972	1.28949	1.30013	1.25073	-0.997663	1.5234	28.1811	1.1e-07	2.89e-06
ENSG00000008853	RHOBTB2	5.1956	5.11845	5.00703	4.5516	4.51891	4.60782	4.23622	4.18884	4.05607	-0.734689	4.66322	28.1418	1.13e-07	2.94e-06
ENSG00000151690	MFSD6	3.4924	3.55017	3.39081	2.722	2.80206	2.79324	2.98907	2.97288	2.77177	-0.636517	3.08895	28.1439	1.13e-07	2.94e-06
ENSG00000166819	PLIN1	0.922817	0.470219	0.386584	-0.645292	-0.400953	-0.496109	-0.259178	-0.765516	-0.690107	-1.18907	-0.0455249	28.1251	1.14e-07	2.95e-06
ENSG00000167740	CYB5D2	3.42367	3.3855	3.57609	2.92612	2.77646	2.8375	2.95059	2.77722	2.84931	-0.612217	3.08724	28.1323	1.13e-07	2.95e-06
ENSG00000294479	ENSG00000294479	-0.665263	-0.351726	-0.638772	-1.59583	-2.02274	-2.83924	-2.99816	-2.84476	-3.09538	-2.14891	-1.50995	28.0987	1.15e-07	2.99e-06
ENSG00000177943	MAMDC4	3.11044	3.31166	3.15406	2.14368	2.2214	2.48465	1.36165	1.37805	1.82215	-1.23979	2.49847	28.0881	1.16e-07	3e-06
ENSG00000103260	METRN	6.44393	6.51658	6.52841	6.10243	5.85286	5.99418	5.70811	5.9453	6.01462	-0.555391	6.15135	28.0836	1.16e-07	3e-06
ENSG00000277196	ENSG00000277196	0.337076	-0.729425	0.263071	-1.5141	-2.02274	-1.85127	-1.58164	-2.33809	-1.17193	-1.87936	-0.888081	28.0746	1.17e-07	3.01e-06
ENSG00000186862	PDZD7	2.82086	2.76986	2.7238	2.2586	2.14341	1.89999	1.82856	1.9947	2.1095	-0.730995	2.33048	28.0681	1.17e-07	3.02e-06
ENSG00000113916	BCL6	3.47552	3.45839	3.45148	2.2053	2.68307	2.13735	2.64802	2.94389	2.4848	-0.922314	2.91828	28.0423	1.19e-07	3.05e-06
ENSG00000224905	ENSG00000224905	1.46905	1.46945	1.31452	0.0625522	0.433417	0.419203	0.485126	-0.38844	0.608673	-1.14428	0.775297	27.9769	1.23e-07	3.15e-06
ENSG00000215325	ASS1P10	4.35165	4.35462	4.33065	3.74883	3.83545	3.69363	3.84759	3.88194	3.84008	-0.53786	4.01098	27.9314	1.26e-07	3.21e-06
ENSG00000291118	ZNF767P	4.1869	3.94714	4.09925	3.42284	3.39962	3.64011	3.50137	3.50656	3.41968	-0.598024	3.71155	27.9014	1.28e-07	3.25e-06
ENSG00000297964	ENSG00000297964	0.0635706	0.884873	0.288634	-0.735051	-1.02474	-0.963779	-0.82639	-0.765516	-1.7711	-1.49596	-0.323422	27.895	1.28e-07	3.26e-06
ENSG00000119915	ELOVL3	5.49259	5.38812	5.48032	4.02144	3.92752	4.04024	4.69187	4.64569	4.82653	-1.05079	4.84483	27.8646	1.3e-07	3.3e-06
ENSG00000108799	EZH1	5.21437	5.18677	5.22213	4.77431	4.79347	4.7044	4.59166	4.52242	4.56826	-0.545362	4.86824	27.8454	1.31e-07	3.33e-06
ENSG00000073910	FRY	2.35737	2.23098	2.12929	0.114871	-0.0870985	-0.344579	1.27711	1.0236	0.808276	-1.68224	1.36398	27.7736	1.36e-07	3.44e-06
ENSG00000168490	PHYHIP	4.59505	4.54389	4.52331	3.76734	3.49429	3.69581	4.03394	3.98337	4.01628	-0.711478	4.12178	27.7184	1.4e-07	3.52e-06
ENSG00000268797	ENSG00000268797	3.00462	3.29996	3.21532	1.75599	1.34288	1.87704	2.28955	2.45645	2.2685	-1.14089	2.52823	27.708	1.41e-07	3.54e-06
ENSG00000198753	PLXNB3	2.5362	2.49496	2.53913	1.84386	1.51792	1.80592	1.78548	1.85375	1.98676	-0.725948	2.08558	27.6567	1.45e-07	3.63e-06
ENSG00000127445	PIN1	6.63432	6.66196	6.59043	6.18848	6.07612	6.19153	6.17788	6.21509	6.18532	-0.456349	6.34165	27.6559	1.45e-07	3.63e-06
ENSG00000225762	LINC01389	0.872136	0.736475	1.12886	-0.231957	-0.0870985	-0.0822535	-0.121643	-0.00254436	0.198811	-1.0038	0.347741	27.6388	1.46e-07	3.65e-06
ENSG00000125746	EML2	6.8756	6.8349	6.80186	6.27509	6.24978	6.38116	6.45748	6.37023	6.41689	-0.477735	6.53758	27.5187	1.56e-07	3.88e-06
ENSG00000198157	HMGN5	2.27524	2.24325	2.32729	1.36047	1.81484	1.43899	1.1873	1.09126	1.23541	-0.916762	1.74401	27.4953	1.57e-07	3.92e-06
ENSG00000186684	CYP27C1	0.708443	0.406158	0.263071	-1.36334	-1.52142	-2.33187	-1.12197	-0.628578	-0.690107	-1.74429	-0.408612	27.4932	1.58e-07	3.93e-06
ENSG00000127564	PKMYT1	6.86295	6.8808	6.86906	6.49491	6.37806	6.46049	6.28922	6.36101	6.42662	-0.467825	6.57658	27.4503	1.61e-07	4.01e-06
ENSG00000272606	PPP4R3B-DT	2.13897	1.71836	1.69512	1.01988	1.0892	0.974795	0.894822	1.1432	0.808276	-0.882176	1.34532	27.4158	1.64e-07	4.07e-06
ENSG00000101246	ARFRP1	5.64124	5.71004	5.68248	5.11339	5.14488	5.17482	5.14801	5.20028	5.32788	-0.492498	5.36961	27.4052	1.65e-07	4.09e-06
ENSG00000230176	LINC01433	-0.129478	-0.145636	-0.335648	-2.50172	-2.28498	-2.07165	-1.18911	-1.49834	-1.44063	-1.7022	-1.04409	27.3864	1.67e-07	4.11e-06
ENSG00000197892	KIF13B	4.06622	4.0865	4.13668	3.33459	3.33384	3.34915	3.55877	3.65481	3.57991	-0.624551	3.71281	27.3867	1.67e-07	4.11e-06
ENSG00000279873	LINC01126	1.42284	1.01942	1.14294	0.372945	0.196508	-0.175127	0.0913955	-0.765516	-0.198908	-1.27318	0.502515	27.3622	1.69e-07	4.15e-06
ENSG00000127586	CHTF18	6.94391	6.79585	6.91775	6.41663	6.34505	6.36407	5.89346	5.9594	6.01686	-0.705796	6.45698	27.3297	1.72e-07	4.21e-06
ENSG00000255468	B4GAT1-DT	2.24236	2.54044	2.05676	1.49486	1.52819	1.27313	1.49596	1.39956	1.64793	-0.828184	1.80299	27.2924	1.75e-07	4.29e-06
ENSG00000099715	PCDH11Y	-0.522805	-0.178004	-0.457851	-2.35219	-1.80092	-2.07165	-1.99697	-1.42088	-3.44437	-1.84415	-1.25953	27.2252	1.81e-07	4.43e-06
ENSG00000101473	ACOT8	5.26844	5.17159	5.09749	4.66561	4.70913	4.7785	4.48128	4.50764	4.55443	-0.561092	4.83225	27.1934	1.84e-07	4.49e-06
ENSG00000213904	LIPE-AS1	1.24837	1.41624	1.32691	0.114871	0.196508	0.238965	0.740999	0.207176	0.584689	-0.994004	0.761391	27.0904	1.94e-07	4.72e-06
ENSG00000095321	CRAT	5.1696	5.10085	5.16029	4.08018	3.98268	4.11243	4.54594	4.5635	4.60001	-0.808424	4.65852	27.0669	1.97e-07	4.77e-06
ENSG00000189221	MAOA	-0.522805	-0.113978	-0.0852862	-2.66857	-1.90757	-2.07165	-3.58431	-1.49834	-1.65233	-2.05595	-1.18355	27.052	1.98e-07	4.8e-06
ENSG00000143412	ANXA9	3.50076	3.68451	3.57089	2.17482	2.21506	2.35779	2.90705	2.96569	2.73955	-0.996972	3.00617	27.0554	1.98e-07	4.8e-06
ENSG00000130382	MLLT1	8.37377	8.37689	8.39191	8.04097	7.95637	7.921	7.90218	7.9309	7.93194	-0.432987	8.10713	27.041	1.99e-07	4.82e-06
ENSG00000272473	ENSG00000272473	3.07354	3.23997	3.07913	2.28167	2.61727	2.56342	2.11962	2.1231	2.37022	-0.778911	2.66529	26.9835	2.05e-07	4.96e-06
ENSG00000254979	ENSG00000254979	2.5684	2.49496	2.64683	2.03248	1.87238	1.90756	1.91102	1.94436	1.88241	-0.649461	2.17441	26.9129	2.13e-07	5.13e-06
ENSG00000066405	CLDN18	3.4924	3.41293	3.44865	2.85099	2.85604	2.76852	3.00417	2.8841	2.85433	-0.582814	3.09157	26.8845	2.16e-07	5.19e-06
ENSG00000301807	ENSG00000301807	1.45764	1.55071	1.3991	-0.689473	-0.0257415	0.190153	-0.0892139	0.432598	0.744761	-1.34798	0.733865	26.8775	2.17e-07	5.21e-06
ENSG00000157833	GAREM2	1.72847	1.51065	1.50103	0.515991	0.0896588	0.0872774	0.811397	0.681196	0.808276	-1.07793	0.969128	26.7216	2.35e-07	5.62e-06
ENSG00000145687	SSBP2	3.54727	3.45311	3.67147	3.04549	3.02504	3.03008	2.80291	2.86102	2.83413	-0.624716	3.17567	26.6894	2.39e-07	5.71e-06
ENSG00000233215	LINC01687	2.0276	2.24935	2.1222	1.53381	1.38867	1.0857	0.958255	0.681196	1.12334	-0.993393	1.56038	26.6295	2.46e-07	5.87e-06
ENSG00000243902	ELFN2	-0.716056	-0.935334	0.156033	-2.35219	-2.02274	-2.07165	-2.26024	-1.85796	-2.04273	-1.85821	-1.30939	26.6014	2.5e-07	5.94e-06
ENSG00000185432	TMT1A	1.83816	1.70954	1.73286	-0.0772004	-0.325071	0.214766	0.548329	0.715907	1.03759	-1.36685	1.01333	26.5687	2.54e-07	6.03e-06
ENSG00000233901	LINC01503	0.746458	0.194907	0.665556	-0.480969	-0.288576	-1.2036	-0.674334	-0.864608	-0.812163	-1.29889	-0.15188	26.5402	2.58e-07	6.11e-06
ENSG00000106541	AGR2	1.78435	2.16154	2.0493	-0.645292	-0.0257415	0.214766	0.666989	0.877942	1.03759	-1.57825	1.1708	26.5358	2.59e-07	6.12e-06
ENSG00000125046	SSUH2	1.26156	1.58004	1.10027	0.189955	0.144072	0.238965	0.349753	0.0253995	-1.01711	-1.30321	0.614447	26.5271	2.6e-07	6.14e-06
ENSG00000198435	NRARP	3.55264	3.62712	3.68598	3.20181	3.08538	2.81353	2.927	2.96569	2.85934	-0.643011	3.22853	26.4646	2.68e-07	6.33e-06
ENSG00000283703	VSIG10L2	1.74734	1.86854	1.73286	0.515991	0.411402	0.309219	0.878519	1.13039	1.00182	-1.06425	1.17571	26.3986	2.78e-07	6.53e-06
ENSG00000198763	MT-ND2	12.3353	12.4935	12.5249	11.9082	12.0841	11.8298	11.5686	11.5648	11.477	-0.698259	12.0274	26.3914	2.79e-07	6.55e-06
ENSG00000130005	GAMT	7.34347	7.38029	7.37709	6.5973	6.5846	6.58754	6.85804	6.95915	6.95078	-0.601128	6.99539	26.3829	2.8e-07	6.56e-06
ENSG00000196689	TRPV1	3.36379	3.38273	3.37598	2.78794	2.94684	2.79324	2.61887	2.74397	2.62663	-0.618762	2.99353	26.3427	2.86e-07	6.69e-06
ENSG00000198840	MT-ND3	11.2787	11.3654	11.3559	10.9511	10.9264	10.9243	10.9377	10.9147	10.8606	-0.414443	11.0712	26.3161	2.9e-07	6.77e-06
ENSG00000115275	MOGS	7.15251	7.18811	7.15469	6.73842	6.71305	6.68572	6.77487	6.69915	6.78767	-0.43178	6.89226	26.2736	2.96e-07	6.9e-06
ENSG00000235437	LINC01278	5.40097	5.43234	5.33147	4.60173	4.69895	4.56897	4.9767	4.93066	4.86063	-0.608294	5.01349	26.1791	3.11e-07	7.22e-06
ENSG00000128652	HOXD3	1.98053	2.2248	1.98821	1.44464	1.34288	1.12519	1.41914	1.05105	1.00182	-0.836473	1.57356	26.1258	3.2e-07	7.41e-06
ENSG00000164078	MST1R	5.88759	5.8675	5.80876	5.26433	5.28541	5.31871	5.44022	5.41156	5.47376	-0.48781	5.54907	26.0857	3.27e-07	7.56e-06
ENSG00000140092	FBLN5	5.41505	5.44369	5.35208	4.30371	4.21807	4.25422	4.77459	4.87991	4.80463	-0.838683	4.90261	25.9998	3.41e-07	7.89e-06
ENSG00000301505	ENSG00000301505	-1.52705	-2.04608	-0.687784	-4.58787	-4.58787	-3.62872	-3.58431	-3.06278	-3.90567	-3.44082	-2.46804	25.9723	3.46e-07	7.99e-06
ENSG00000203709	MIR29B2CHG	1.03458	1.53082	1.15689	-0.333463	-0.565855	-0.175127	0.349753	0.231371	-1.17193	-1.48616	0.467407	25.9582	3.49e-07	8.04e-06
ENSG00000294151	ENSG00000294151	1.72847	1.57033	1.56518	0.890803	0.389046	0.419203	1.01902	0.766457	0.560299	-0.944855	1.07328	25.9462	3.51e-07	8.07e-06
ENSG00000170421	KRT8	2.88617	2.87615	2.96089	2.33778	2.24648	2.37427	2.35583	2.30509	2.22261	-0.602904	2.53697	25.9295	3.54e-07	8.13e-06
ENSG00000171222	SCAND1	5.66996	5.68775	5.80434	4.86874	4.74258	4.69131	5.15056	5.20257	5.25282	-0.720771	5.28373	25.9058	3.58e-07	8.22e-06
ENSG00000109736	MFSD10	5.91965	5.98682	6.03895	5.5959	5.41277	5.57307	5.26786	5.43389	5.25851	-0.553026	5.63848	25.871	3.65e-07	8.36e-06
ENSG00000149311	ATM	3.28848	3.38827	3.28048	2.79196	2.71487	2.6917	2.71382	2.51183	2.27601	-0.694667	2.89702	25.8003	3.79e-07	8.66e-06
ENSG00000289421	ENSG00000289421	3.76662	3.38827	3.61702	2.9077	2.96585	2.8375	3.01912	2.96569	3.08981	-0.635453	3.20881	25.7573	3.87e-07	8.84e-06
ENSG00000167525	PROCA1	2.35122	2.42665	2.32729	1.21226	1.5485	1.23755	1.92697	1.30013	1.51465	-0.901712	1.83877	25.7029	3.98e-07	9.05e-06
ENSG00000263293	EFCAB13-DT	2.00426	1.96803	2.02669	1.30525	1.17009	1.41795	1.1873	0.831213	0.828841	-0.867488	1.48741	25.661	4.07e-07	9.22e-06
ENSG00000139880	CDH24	5.11343	5.1756	5.12614	4.74452	4.55575	4.67255	4.26472	4.49395	4.47999	-0.595852	4.77018	25.6448	4.1e-07	9.29e-06
ENSG00000184634	MED12	5.32135	5.36303	5.33608	4.94388	4.91776	4.82321	4.84235	4.64569	4.7916	-0.510178	5.02119	25.5977	4.21e-07	9.51e-06
ENSG00000225880	LINC00115	1.51382	1.81198	1.74214	0.732378	0.617754	0.870226	1.04846	0.893188	1.03759	-0.837637	1.20125	25.5254	4.37e-07	9.85e-06
ENSG00000189057	FAM111B	3.31402	3.01863	2.98845	2.14996	2.58813	2.53926	2.39647	2.32209	2.3275	-0.723794	2.67606	25.3491	4.78e-07	1.07e-05
ENSG00000164089	ETNPPL	3.04331	3.06086	2.90826	1.88963	1.81484	1.7053	2.48528	2.241	2.2983	-0.913323	2.4678	25.2967	4.92e-07	1.09e-05
ENSG00000196154	S100A4	10.1477	10.1191	10.1218	8.92944	8.90375	8.94751	9.5252	9.5503	9.56853	-0.858908	9.61691	25.2997	4.91e-07	1.09e-05
ENSG00000142102	PGGHG	4.26918	4.31592	4.21709	2.09241	2.17642	2.11137	3.24258	3.35789	3.22007	-1.46167	3.47214	25.2757	4.97e-07	1.1e-05
ENSG00000286193	CPLANE1-AS1	0.649474	0.869118	0.665556	-0.298828	0.117122	-0.207462	-0.295713	-0.281867	-0.423702	-0.984085	0.170656	25.2712	4.98e-07	1.1e-05
ENSG00000304841	ENSG00000304841	0.649474	0.804321	1.01095	-0.0481458	-0.440445	-0.1435	-0.0264647	0.0528125	-0.157866	-0.977182	0.269559	25.2714	4.98e-07	1.1e-05
ENSG00000170581	STAT2	6.23753	6.20529	6.16679	5.79091	5.67256	5.74504	5.77294	5.83367	5.71173	-0.448218	5.92073	25.2318	5.08e-07	1.12e-05
ENSG00000290832	ENSG00000290832	3.77123	3.64573	3.57609	2.98704	3.03587	3.00208	3.24258	3.13556	3.09406	-0.583463	3.30604	25.1674	5.26e-07	1.16e-05
ENSG00000157343	ARMC12	-0.435093	-0.113978	-0.375243	-1.5141	-1.80092	-2.482	-2.58253	-3.63254	-3.44437	-2.31362	-1.32316	25.0959	5.45e-07	1.2e-05
ENSG00000125744	RTN2	3.44116	3.47409	3.33056	2.99054	2.91199	2.63355	2.58912	2.7013	2.67286	-0.661287	3.01229	25.081	5.5e-07	1.21e-05
ENSG00000088899	LZTS3	3.64861	3.56001	3.84949	1.93399	1.83151	2.16287	2.88681	2.8057	2.86433	-1.2158	3.00425	25.0577	5.56e-07	1.22e-05
ENSG00000260466	ENSG00000260466	1.26156	0.820795	0.831272	0.261323	-0.325071	0.0329509	-0.188772	-0.214955	-0.749845	-1.17648	0.329204	24.9697	5.82e-07	1.28e-05
ENSG00000084693	AGBL5	6.35561	6.285	6.34031	5.87057	5.97843	5.86457	5.82492	5.92273	5.79836	-0.449525	6.04371	24.954	5.87e-07	1.28e-05
ENSG00000205744	DENND1C	0.479314	0.0346602	0.433172	-0.830767	-0.610204	-1.49139	-1.25953	-1.02731	-0.524441	-1.31883	-0.382393	24.9371	5.92e-07	1.29e-05
ENSG00000260498	ENSG00000260498	2.32004	2.45331	2.49589	1.78049	1.58829	1.45973	1.64797	1.8922	1.83237	-0.725308	1.98771	24.8465	6.21e-07	1.35e-05
ENSG00000186603	HPDL	6.3202	6.4638	6.36755	5.6176	5.50985	5.44175	5.84341	5.89649	5.98056	-0.656701	5.98226	24.8487	6.2e-07	1.35e-05
ENSG00000138030	KHK	3.53374	3.65495	3.39376	3.04549	2.96585	2.92959	2.93885	2.97646	2.93243	-0.568466	3.1797	24.842	6.22e-07	1.35e-05
ENSG00000105701	FKBP8	8.18673	8.19375	8.1883	7.86516	7.72257	7.80118	7.54805	7.55904	7.61737	-0.49904	7.87677	24.8524	6.19e-07	1.35e-05
ENSG00000080293	SCTR	1.31313	1.36099	1.35138	-1.10217	-0.802634	-1.2036	0.608879	-0.120069	-0.749845	-1.8075	0.426573	24.8121	6.32e-07	1.37e-05
ENSG00000302542	ENSG00000302542	2.41161	2.71363	2.83208	1.51447	1.42208	1.53984	1.98142	1.85375	2.09259	-0.917699	2.12395	24.8207	6.29e-07	1.37e-05
ENSG00000155893	PXYLP1	0.955642	1.01942	0.831272	-0.830767	-1.02474	0.139632	-0.0892139	-0.120069	-0.28467	-1.29105	0.2319	24.7519	6.52e-07	1.41e-05
ENSG00000152104	PTPN14	6.36747	6.42257	6.43313	6.00833	5.96763	5.92967	5.94916	6.04252	5.96206	-0.431149	6.13544	24.7463	6.54e-07	1.41e-05
ENSG00000064393	HIPK2	4.86719	4.7865	4.93196	3.14633	3.21812	3.28668	4.1691	3.9887	4.09267	-1.15011	4.20585	24.7372	6.57e-07	1.42e-05
ENSG00000224505	HEXIM2-AS1	0.955642	1.08908	1.32691	0.0356637	-0.400953	-1.49139	-0.121643	0.0528125	-0.0791264	-1.42801	0.365031	24.6975	6.71e-07	1.44e-05
ENSG00000050555	LAMC3	6.45509	6.55986	6.58914	6.13842	6.03936	6.15105	5.80726	5.80423	5.93089	-0.550524	6.19317	24.6852	6.75e-07	1.45e-05
ENSG00000061455	PRDM6	1.80251	1.62763	1.81431	0.681247	0.848273	0.757481	0.926887	0.96709	1.2809	-0.845768	1.2514	24.6753	6.78e-07	1.46e-05
ENSG00000099899	TRMT2A	6.6419	6.6525	6.6502	6.2457	6.17539	6.22485	6.23783	6.22077	6.26953	-0.419162	6.38283	24.6272	6.96e-07	1.49e-05
ENSG00000196544	BORCS6	3.09947	2.99342	3.07913	2.4591	2.39411	2.37973	1.69528	2.0637	2.24574	-0.834074	2.56068	24.6172	6.99e-07	1.5e-05
ENSG00000264668	ENSG00000264668	0.337076	0.316063	0.237047	-1.36334	-0.703213	-0.496109	-0.996381	-0.585676	-0.877295	-1.16075	-0.341546	24.5892	7.09e-07	1.51e-05
ENSG00000175322	ZNF519	1.45764	1.68275	1.58595	0.591784	0.958656	0.974795	0.72285	0.732955	0.700809	-0.805179	1.1015	24.5327	7.31e-07	1.55e-05
ENSG00000179240	GVQW3	2.83857	3.11529	3.22529	2.07271	2.12999	1.99541	2.39647	2.37192	2.57886	-0.804001	2.58805	24.5453	7.26e-07	1.55e-05
ENSG00000131188	PRR7	2.37568	2.5454	2.70019	1.97702	1.67401	1.89238	1.77671	1.95166	1.8626	-0.692534	2.12634	24.5218	7.35e-07	1.56e-05
ENSG00000149743	TRPT1	3.9751	3.92826	3.93291	3.47881	3.19897	3.33519	3.26471	3.36338	3.55235	-0.577583	3.58839	24.4856	7.49e-07	1.59e-05
ENSG00000037757	MRI1	6.12299	6.05194	6.0939	5.62043	5.68236	5.66915	5.64204	5.70675	5.63717	-0.430146	5.81792	24.4383	7.67e-07	1.62e-05
ENSG00000251141	MRPS30-DT	2.3635	2.27946	2.0418	1.0061	1.03263	1.34178	1.60898	1.38885	1.61278	-0.896118	1.70758	24.4269	7.72e-07	1.63e-05
ENSG00000290758	POLR2J4	3.21921	3.29996	3.373	2.72621	2.75038	2.78915	2.61396	2.70994	2.80847	-0.567709	2.94772	24.4191	7.75e-07	1.64e-05
ENSG00000104213	PDGFRL	3.42367	3.47409	3.32748	2.66173	2.59303	2.4897	2.927	2.94389	2.75037	-0.676058	2.99754	24.3918	7.86e-07	1.66e-05
ENSG00000088367	EPB41L1	7.29098	7.34957	7.35948	6.89879	7.00875	6.88983	6.9096	6.87478	6.89274	-0.420675	7.06731	24.364	7.97e-07	1.68e-05
ENSG00000105726	ATP13A1	8.06215	8.06137	8.07477	7.64336	7.62641	7.63075	7.23122	7.25027	7.28341	-0.609453	7.68963	24.3523	8.02e-07	1.69e-05
ENSG00000115596	WNT6	4.23449	4.26114	4.20539	3.8116	3.7525	3.70453	3.37342	3.46635	3.48268	-0.626968	3.84807	24.3354	8.09e-07	1.7e-05
ENSG00000266929	ENSG00000266929	3.13931	3.15156	3.24501	2.67486	2.65055	2.66515	2.36756	2.34445	2.38418	-0.659455	2.77613	24.3231	8.15e-07	1.71e-05
ENSG00000257622	ENSG00000257622	-2.95634	-3.03734	-2.7481	-4.58787	-4.58787	-4.58787	-4.58787	-4.58787	-4.58787	-5.17737	-3.80254	24.1997	8.68e-07	1.82e-05
ENSG00000214145	LINC00887	3.54996	3.4345	3.36401	2.83548	2.83552	3.03355	2.77235	2.93286	2.78235	-0.584748	3.08998	24.1356	8.98e-07	1.87e-05
ENSG00000210196	MT-TP	6.35714	6.40526	6.37241	5.93519	6.00164	5.94492	6.01123	5.90215	5.91775	-0.425922	6.10899	24.0936	9.18e-07	1.91e-05
ENSG00000112667	DNPH1	6.98647	7.02151	7.00611	6.63473	6.40511	6.53445	6.45301	6.53268	6.67257	-0.463257	6.71313	23.9683	9.79e-07	2.03e-05
ENSG00000127954	STEAP4	-0.274208	-0.729425	0.210544	-1.77465	-1.70161	-2.83924	-1.77441	-1.34737	-1.90053	-1.75642	-1.07974	23.9471	9.9e-07	2.05e-05
ENSG00000065518	NDUFB4	8.31273	8.24567	8.27977	7.63625	7.64863	7.63217	7.90797	7.87788	7.90813	-0.505429	7.96312	23.947	9.9e-07	2.05e-05
ENSG00000105486	LIG1	6.98895	7.04602	7.01188	6.50536	6.40233	6.45404	6.61616	6.65203	6.64167	-0.467607	6.7216	23.9487	9.89e-07	2.05e-05
ENSG00000069812	HES2	4.59244	4.53518	4.58651	4.16637	4.1499	3.99122	4.08634	4.08147	3.96146	-0.497231	4.26006	23.9067	1.01e-06	2.09e-05
ENSG00000228559	ENSG00000228559	0.45656	0.268815	0.433172	-0.405331	-0.802634	-1.1398	-0.493706	-0.585676	-0.524441	-1.0755	-0.213688	23.8327	1.05e-06	2.17e-05
ENSG00000280071	ENSG00000280071	5.29353	5.28057	5.23369	4.63234	4.66096	4.60317	4.84969	4.86065	4.87677	-0.518597	4.94571	23.762	1.09e-06	2.24e-05
ENSG00000101115	SALL4	5.17135	5.03265	5.26702	4.67108	4.76337	4.5773	4.68602	4.68235	4.65719	-0.48675	4.85477	23.7614	1.09e-06	2.24e-05
ENSG00000253368	TRNP1	1.09476	0.609481	1.66616	0.394269	-0.0257415	-0.496109	-0.411221	-0.672795	-0.473193	-1.45962	0.405452	23.7051	1.12e-06	2.31e-05
ENSG00000171368	TPPP	5.23707	5.28577	5.23451	4.8015	4.71813	4.84997	4.67427	4.88468	4.75714	-0.470257	4.95698	23.7005	1.13e-06	2.31e-05
ENSG00000179364	PACS2	5.73227	5.76959	5.69029	5.34252	5.27858	5.27623	5.27099	5.34797	5.27266	-0.432832	5.45757	23.6284	1.17e-06	2.39e-05
ENSG00000011478	QPCTL	6.02973	6.06928	6.13456	5.5645	5.57629	5.59726	5.7058	5.63034	5.72001	-0.445381	5.7976	23.6036	1.18e-06	2.42e-05
ENSG00000127399	LRRC61	4.18344	4.23832	4.10645	3.50355	3.39682	3.2544	3.62135	3.79533	3.61289	-0.638149	3.78539	23.5227	1.23e-06	2.51e-05
ENSG00000153048	CARHSP1	2.91567	2.69588	3.01931	1.96282	2.1633	2.23081	2.19397	2.16767	2.43872	-0.690079	2.46382	23.5051	1.25e-06	2.54e-05
ENSG00000003249	DBNDD1	3.70037	3.67774	3.81472	3.28693	3.10951	3.20304	3.03024	3.27011	2.95599	-0.584926	3.37014	23.4849	1.26e-06	2.56e-05
ENSG00000176182	MYPOP	3.57394	3.53027	3.58127	2.87394	2.99575	2.97712	2.93491	3.2105	2.91329	-0.575104	3.20597	23.4862	1.26e-06	2.56e-05
ENSG00000069424	KCNAB2	5.53936	5.66911	5.69806	5.00926	4.84981	4.96324	5.22014	5.24478	5.15746	-0.556654	5.29118	23.4764	1.26e-06	2.56e-05
ENSG00000100350	FOXRED2	8.07423	8.10951	8.14533	7.65224	7.56338	7.58029	7.7045	7.72718	7.79019	-0.438256	7.83313	23.4752	1.27e-06	2.56e-05
ENSG00000100239	PPP6R2	6.83069	6.8744	6.85175	6.48283	6.45641	6.44204	6.41537	6.38143	6.47227	-0.410467	6.59221	23.4808	1.26e-06	2.56e-05
ENSG00000132938	MTUS2	2.29461	2.33786	2.21845	1.53381	1.57845	1.76485	1.1873	1.11746	1.55223	-0.820525	1.79646	23.4353	1.29e-06	2.61e-05
ENSG00000203950	RTL8A	6.39578	6.47555	6.49002	5.91919	5.85795	5.84893	6.04769	6.12353	6.03135	-0.479639	6.15311	23.4268	1.3e-06	2.62e-05
ENSG00000054179	ENTPD2	2.97291	3.09512	2.94891	2.11185	2.12999	2.2957	0.973686	1.57052	1.70466	-1.15309	2.3515	23.4222	1.3e-06	2.63e-05
ENSG00000172667	ZMAT3	6.42794	6.44665	6.28303	4.7466	4.80302	4.79696	5.66836	5.60395	5.69643	-1.10389	5.75202	23.4161	1.3e-06	2.63e-05
ENSG00000163286	ALPG	0.233809	0.609481	0.0100002	-2.21671	-1.52142	-0.711076	-0.72326	-1.49834	-1.17193	-1.62075	-0.52045	23.4023	1.31e-06	2.65e-05
ENSG00000146530	VWDE	2.38173	2.53045	2.46258	1.7642	2.00325	1.82203	1.82004	1.77364	1.56455	-0.666822	2.05356	23.3477	1.35e-06	2.72e-05
ENSG00000166965	RCCD1	6.55118	6.66937	6.57914	5.78183	5.71867	5.82465	6.0952	6.20176	6.17481	-0.621847	6.21748	23.3337	1.36e-06	2.73e-05
ENSG00000232909	ENSG00000232909	0.0635706	-0.279708	-0.902401	-1.77465	-1.90757	-3.31511	-3.58431	-3.06278	-1.90053	-2.36157	-1.3593	23.3265	1.37e-06	2.74e-05
ENSG00000111788	DDX12B	2.32004	2.27349	2.07891	1.32759	1.646	1.55919	0.811397	1.33404	1.2809	-0.887147	1.7051	23.3067	1.38e-06	2.76e-05
ENSG00000188825	LINC00910	4.57142	4.48179	4.44874	4.05362	4.03041	3.87056	3.98719	4.08811	4.00954	-0.494317	4.19197	23.2524	1.42e-06	2.84e-05
ENSG00000138764	CCNG2	3.49519	3.42375	3.41713	2.27018	1.99587	2.22477	2.75459	2.80167	2.85433	-0.930931	2.89784	23.1896	1.47e-06	2.93e-05
ENSG00000203485	INF2	8.06978	8.13094	8.12397	7.7701	7.70033	7.74578	7.60583	7.68154	7.68255	-0.409898	7.84857	23.1691	1.48e-06	2.96e-05
ENSG00000237638	LINC02245	0.783497	0.628321	0.915726	-0.137126	-0.0870985	-0.0822535	-0.259178	-0.425789	0.16686	-0.941982	0.23845	23.1644	1.49e-06	2.97e-05
ENSG00000265752	LINC02958	2.28172	2.10212	2.20508	0.698493	0.617754	1.01739	1.31395	1.60796	1.38177	-1.06231	1.58766	23.1397	1.51e-06	3e-05
ENSG00000134709	HOOK1	2.18122	2.54044	2.21178	1.30525	1.55855	1.83797	1.46354	1.58936	1.46296	-0.783116	1.85283	23.1416	1.51e-06	3e-05
ENSG00000304518	ENSG00000304518	0.179265	0.219966	-0.457851	-0.830767	-1.70161	-1.66014	-1.49412	-2.07815	-1.17193	-1.55398	-0.782538	23.0125	1.61e-06	3.19e-05
ENSG00000293210	SSR4P1	2.38173	2.54044	2.07156	1.16342	0.896618	0.74063	1.73204	1.48254	1.46296	-1.07105	1.72979	23.0058	1.62e-06	3.2e-05
ENSG00000185946	RNPC3	2.99281	2.8483	2.93684	2.34327	2.20229	2.54413	2.07739	2.17392	2.20699	-0.664159	2.5215	22.9903	1.63e-06	3.22e-05
ENSG00000215375	MYL5	3.36073	3.37439	3.36401	2.85868	2.72383	2.92959	2.57907	2.76069	2.85934	-0.57953	3.00835	22.9461	1.67e-06	3.29e-05
ENSG00000131697	NPHP4	5.00784	4.99685	4.92281	4.56342	4.39957	4.56778	4.49739	4.53097	4.53266	-0.460584	4.68649	22.9423	1.67e-06	3.3e-05
ENSG00000260630	SNAI3-AS1	2.3635	2.71363	2.50136	1.81253	1.74614	1.80592	1.98903	1.8922	1.97758	-0.668169	2.128	22.9328	1.68e-06	3.31e-05
ENSG00000090581	GNPTG	5.81453	5.78384	5.76447	5.31762	5.28919	5.40077	5.40793	5.23584	5.40523	-0.444026	5.50767	22.9061	1.7e-06	3.35e-05
ENSG00000130827	PLXNA3	2.69043	2.86825	3.04204	2.29873	1.91212	2.18795	2.25208	2.15507	2.33471	-0.683295	2.45874	22.8689	1.73e-06	3.41e-05
ENSG00000144426	NBEAL1	2.96487	3.08151	2.91648	2.30437	1.88042	2.3467	2.32608	2.40951	2.45203	-0.696855	2.56649	22.8313	1.77e-06	3.47e-05
ENSG00000288838	ENSG00000288838	-1.0653	0.219966	-0.73852	-3.07442	-2.60571	-2.07165	-2.99816	-1.66698	-3.44437	-2.35986	-1.4395	22.8268	1.77e-06	3.48e-05
ENSG00000245213	GALNT7-DT	2.43508	2.36057	2.51225	1.6536	2.03959	1.56877	1.54843	1.78186	1.4364	-0.757006	1.98175	22.7916	1.81e-06	3.54e-05
ENSG00000129595	EPB41L4A	3.88637	3.87994	4.04027	2.43358	2.43832	2.6198	3.33211	3.28752	3.11515	-1.02005	3.34402	22.7361	1.86e-06	3.63e-05
ENSG00000261659	ENSG00000261659	0.409947	0.59039	0.237047	-0.36895	-0.655959	-0.274392	-0.72326	-0.765516	-0.749845	-1.03571	-0.162029	22.7143	1.88e-06	3.67e-05
ENSG00000162426	SLC45A1	0.0635706	0.0626347	0.313752	-2.09286	-3.59974	-1.2036	-1.25953	-1.66698	-1.17193	-1.93352	-0.784136	22.7099	1.88e-06	3.68e-05
ENSG00000299959	ENSG00000299959	-1.72091	-0.935334	-1.08731	-3.64117	-3.59974	-4.58787	-2.99816	-4.03253	-2.37764	-2.82498	-2.27695	22.6669	1.93e-06	3.75e-05
ENSG00000185065	UFD1-AS1	2.0276	1.83649	1.88305	1.01988	1.03263	0.806883	1.21354	1.00968	1.48903	-0.823478	1.42978	22.6598	1.93e-06	3.77e-05
ENSG00000304374	ENSG00000304374	-1.72091	-0.592241	-1.54826	-3.07442	-3.01875	-3.05764	-4.58787	-4.58787	-3.44437	-2.97375	-2.28229	22.6516	1.94e-06	3.78e-05
ENSG00000008300	CELSR3	4.52706	4.25357	4.38499	3.91849	3.9506	3.92751	3.66952	3.64358	3.65956	-0.591919	4.02662	22.6311	1.96e-06	3.81e-05
ENSG00000272631	ENSG00000272631	1.9564	1.77863	1.70465	1.27108	1.07526	1.09898	1.06296	0.846958	1.13989	-0.739983	1.37294	22.599	2e-06	3.87e-05
ENSG00000119431	HDHD3	6.29517	6.31802	6.32688	5.41603	5.22437	5.3846	5.81156	5.84988	5.8293	-0.706478	5.88292	22.5995	2e-06	3.87e-05
ENSG00000188153	COL4A5	7.32002	7.27082	7.22154	6.31198	6.37379	6.30405	6.79808	6.79002	6.83419	-0.683146	6.85364	22.5914	2e-06	3.88e-05
ENSG00000231527	FAM27C	1.20807	1.16846	1.12886	0.515991	0.196508	-0.0235017	0.373216	0.533344	0.31998	-0.856485	0.666766	22.5678	2.03e-06	3.92e-05
ENSG00000260563	ENSG00000260563	1.85565	1.38334	1.78767	0.573206	1.0035	1.0857	0.588976	0.663522	0.37695	-0.964682	1.1287	22.5591	2.04e-06	3.94e-05
ENSG00000263321	ENSG00000263321	1.35064	1.58004	1.38731	0.920502	0.692684	0.309219	0.588976	0.231371	0.31998	-0.927796	0.903732	22.5044	2.1e-06	4.04e-05
ENSG00000266402	SNHG25	0.889228	0.719003	0.704062	-0.298828	-0.909418	0.113692	-0.773904	-0.120069	-0.812163	-1.22263	0.0991748	22.4963	2.11e-06	4.05e-05
ENSG00000166578	IQCD	2.24899	2.3718	2.43423	1.81253	1.73732	1.64319	1.68594	1.55143	1.20427	-0.738978	1.90816	22.4835	2.12e-06	4.07e-05
ENSG00000010322	NISCH	6.50654	6.54692	6.49894	6.16929	6.08918	6.12613	5.80079	5.84499	5.8856	-0.524354	6.19009	22.4657	2.14e-06	4.11e-05
ENSG00000204084	INPP5B	5.23958	5.39157	5.34067	4.85439	4.92942	4.93019	4.8392	4.89134	4.7287	-0.461721	5.03464	22.4274	2.18e-06	4.18e-05
ENSG00000178761	FAM219B	4.38366	4.33181	4.35506	3.90184	3.89417	3.84319	3.90908	3.85883	3.95446	-0.464328	4.06525	22.4098	2.2e-06	4.21e-05
ENSG00000181038	METTL23	3.42367	3.70462	3.56567	2.83548	2.89622	2.84145	3.06667	3.17352	2.92767	-0.609801	3.1941	22.4058	2.21e-06	4.22e-05
ENSG00000256673	ENSG00000256673	-0.0622171	0.117007	0.522066	-1.16317	-2.7975	-0.85733	-1.77441	-1.5802	-2.81458	-1.98688	-0.736368	22.3907	2.22e-06	4.25e-05
ENSG00000150281	CTF1	1.28758	1.38334	1.65637	-0.442654	0.196508	-0.909573	0.373216	0.157535	0.678321	-1.39279	0.693922	22.3633	2.26e-06	4.3e-05
ENSG00000297719	ENSG00000297719	2.41752	2.31478	2.46819	1.24784	1.60779	1.31926	1.67654	1.72335	1.94026	-0.807999	1.9198	22.3346	2.29e-06	4.36e-05
ENSG00000288735	ENSG00000288735	-1.20342	-0.729425	-1.37772	-3.07442	-4.58787	-3.05764	-2.58253	-2.33809	-3.44437	-2.36313	-2.05725	22.2141	2.44e-06	4.63e-05
ENSG00000167670	CHAF1A	7.7438	7.75088	7.70685	7.1582	7.10705	7.11123	7.35054	7.36783	7.39558	-0.480388	7.43218	22.2101	2.44e-06	4.64e-05
ENSG00000180592	SKIDA1	3.67102	3.51263	3.77909	2.80396	2.8147	2.76435	3.13689	3.13556	3.20048	-0.674472	3.2467	22.1944	2.46e-06	4.67e-05
ENSG00000178802	MPI	6.54816	6.60217	6.60003	6.2552	6.19526	6.20003	6.09344	6.14	6.11118	-0.416819	6.31963	22.1934	2.47e-06	4.67e-05
ENSG00000107611	CUBN	-0.823344	-0.549267	0.156033	-1.5141	-1.80092	-1.85127	-1.99697	-1.49834	-2.04273	-1.5465	-1.12684	22.1697	2.5e-06	4.71e-05
ENSG00000169241	SLC50A1	7.14363	7.15763	7.11305	6.63081	6.6548	6.65457	6.82066	6.77003	6.75749	-0.421951	6.87115	22.1549	2.52e-06	4.74e-05
ENSG00000150593	PDCD4	7.1799	7.17456	7.1126	6.29046	6.36845	6.3112	6.75044	6.7474	6.69305	-0.614901	6.77654	22.1459	2.53e-06	4.76e-05
ENSG00000159899	NPR2	2.07319	2.10212	1.83181	1.04707	1.43305	1.09898	0.811397	0.207176	0.678321	-1.09373	1.38345	22.1323	2.54e-06	4.79e-05
ENSG00000073169	SELENOO	6.7054	6.74874	6.74211	6.33249	6.33485	6.36063	5.98053	6.0455	6.15255	-0.523512	6.40517	22.1045	2.58e-06	4.86e-05
ENSG00000213420	GPC2	1.78435	1.82836	1.3991	0.860479	0.781185	1.13811	0.373216	0.715907	0.766245	-0.907483	1.15265	22.0905	2.6e-06	4.89e-05
ENSG00000151498	ACAD8	4.99605	5.01933	4.9857	4.40173	4.51117	4.63657	4.56134	4.58243	4.54514	-0.459636	4.71119	22.0857	2.61e-06	4.9e-05
ENSG00000164068	RNF123	6.1284	6.15826	6.09662	5.78285	5.73483	5.73018	5.62504	5.71482	5.59652	-0.429201	5.85652	22.0805	2.61e-06	4.91e-05
ENSG00000196123	MATCAP1	4.14304	4.14164	4.20372	3.72378	3.5905	3.70887	3.24894	3.48156	3.62764	-0.592265	3.79711	22.0653	2.64e-06	4.94e-05
ENSG00000119943	PYROXD2	2.32004	2.42125	2.1916	1.54339	1.45474	1.71396	1.71378	1.83018	1.58887	-0.674217	1.90473	22.0307	2.68e-06	5.02e-05
ENSG00000119771	KLHL29	4.85854	4.94425	4.935	4.49227	4.45846	4.45092	4.021	4.16392	4.09055	-0.621273	4.53028	22.0286	2.69e-06	5.02e-05
ENSG00000167306	MYO5B	5.76967	5.79847	5.79489	5.28517	5.29896	5.16538	5.36907	5.43779	5.41206	-0.457415	5.49972	21.9824	2.75e-06	5.13e-05
ENSG00000100280	AP1B1	8.48494	8.52043	8.48676	8.16624	8.1304	8.11949	8.08647	8.08376	8.10606	-0.381836	8.25447	21.9757	2.76e-06	5.15e-05
ENSG00000231170	PDK4-AS1	-0.716056	-0.729425	-1.15462	-2.09286	-3.01875	-4.58787	-2.58253	-2.65541	-2.37764	-2.18553	-1.81163	21.924	2.84e-06	5.28e-05
ENSG00000006282	SPATA20	6.80446	6.80364	6.85041	6.35781	6.36451	6.36098	6.4475	6.44746	6.48933	-0.407737	6.56116	21.892	2.88e-06	5.35e-05
ENSG00000108846	ABCC3	6.9705	6.94138	7.02406	5.43416	5.44699	5.43456	6.30074	6.30297	6.30207	-1.04577	6.37156	21.885	2.89e-06	5.37e-05
ENSG00000102125	TAFAZZIN	5.86562	5.90805	5.80876	5.50449	5.4916	5.42537	5.24101	5.32848	5.18863	-0.493192	5.55206	21.8631	2.93e-06	5.42e-05
ENSG00000103024	NME3	5.27252	5.34463	5.24189	4.2196	4.10088	4.09927	4.67427	4.73195	4.81884	-0.81551	4.7978	21.8305	2.98e-06	5.5e-05
ENSG00000119574	ZBTB45	5.14223	5.19785	5.20712	4.78847	4.68754	4.66028	4.6778	4.64005	4.86935	-0.460862	4.89286	21.7488	3.11e-06	5.71e-05
ENSG00000132182	NUP210	9.51214	9.54388	9.55521	8.30121	8.28169	8.26127	8.96288	8.97858	8.98253	-0.86795	9.01979	21.7367	3.13e-06	5.74e-05
ENSG00000304586	ENSG00000304586	-0.716056	-0.549267	-0.961443	-2.66857	-3.01875	-1.49139	-2.26024	-2.65541	-2.37764	-1.8098	-1.58619	21.6873	3.21e-06	5.88e-05
ENSG00000137474	MYO7A	0.00204727	-0.636535	0.183546	-1.22686	-1.6087	-1.85127	-1.12197	-1.21072	-1.5426	-1.38357	-0.839879	21.6324	3.3e-06	6.04e-05
ENSG00000160949	TONSL	6.9579	6.88202	6.87303	6.6076	6.51694	6.4752	6.41501	6.40189	6.48042	-0.420464	6.6386	21.6158	3.33e-06	6.08e-05
ENSG00000162006	MSLNL	3.85409	4.0185	3.86444	2.98352	3.05019	3.26622	2.26468	1.98762	2.12621	-1.21972	3.2261	21.6091	3.34e-06	6.09e-05
ENSG00000135473	PAN2	6.23042	6.32741	6.29096	5.26361	5.29596	5.35791	5.81424	5.83959	5.78789	-0.701733	5.85562	21.4733	3.59e-06	6.5e-05
ENSG00000130653	PNPLA7	3.47834	3.53027	3.68357	2.70077	2.72829	3.01615	2.20709	1.73185	2.15907	-1.08469	2.94242	21.4019	3.72e-06	6.74e-05
ENSG00000172361	CFAP53	2.85606	2.86825	2.90413	1.90457	2.21506	1.98113	2.33805	2.37735	2.34902	-0.6767	2.46467	21.3921	3.74e-06	6.76e-05
ENSG00000165300	SLITRK5	4.53929	4.59387	4.56444	3.71745	3.69671	3.75575	4.16238	4.01333	4.1632	-0.635978	4.17545	21.3928	3.74e-06	6.76e-05
ENSG00000084754	HADHA	8.82718	8.80207	8.79562	8.31115	8.33621	8.27075	8.4691	8.47508	8.46685	-0.417778	8.54371	21.363	3.8e-06	6.85e-05
ENSG00000099622	CIRBP	7.47824	7.42559	7.4265	7.03399	7.04473	7.17807	6.94085	6.9227	6.91185	-0.435264	7.16854	21.3526	3.82e-06	6.88e-05
ENSG00000307843	ENSG00000307843	0.523772	0.361814	-0.73852	-1.68247	-1.6087	-1.2036	-1.12197	-1.02731	-1.17193	-1.52398	-0.640103	21.263	4e-06	7.16e-05
ENSG00000176809	LRRC37A3	-0.0954556	-0.315267	-0.500999	-1.16317	-1.6087	-1.34033	-1.58164	-1.85796	-1.17193	-1.23308	-0.952524	21.263	4e-06	7.16e-05
ENSG00000132763	MMACHC	6.20292	6.15664	6.23864	5.7793	5.74366	5.75608	5.85907	5.78188	5.83947	-0.406254	5.94219	21.2645	4e-06	7.16e-05
ENSG00000235560	ZNF747-DT	2.2556	2.33213	2.50682	1.5529	1.59807	1.42851	1.74109	1.0236	1.83237	-0.828746	1.87619	21.215	4.11e-06	7.32e-05
ENSG00000267080	ASB16-AS1	2.20871	2.39399	2.1916	1.70571	1.65539	1.75649	1.39642	1.50256	1.63631	-0.660952	1.86618	21.2039	4.13e-06	7.35e-05
ENSG00000160094	ZNF362	4.91283	4.86108	4.86875	4.47611	4.42176	4.4548	4.51067	4.43527	4.39118	-0.43265	4.60771	21.2063	4.12e-06	7.35e-05
ENSG00000272808	GCAWKR	2.71939	2.70478	2.6219	1.89712	1.92771	2.3467	1.9966	1.68882	1.82215	-0.725956	2.24385	21.1406	4.27e-06	7.57e-05
ENSG00000106351	AGFG2	4.38668	4.51	4.33373	3.95482	3.93911	4.05565	3.73438	3.86464	3.7513	-0.524826	4.08463	21.0921	4.38e-06	7.75e-05
ENSG00000130813	SHFL	3.09211	3.19328	3.19181	1.90457	1.848	1.36396	2.57402	2.46158	2.2685	-1.04099	2.55736	21.0791	4.41e-06	7.8e-05
ENSG00000267073	ENSG00000267073	1.49161	1.40536	1.28941	-0.231957	-0.522829	-0.496109	0.588976	0.681196	0.198811	-1.31232	0.677225	21.0713	4.43e-06	7.82e-05
ENSG00000197766	CFD	2.53077	2.72243	2.59141	1.99109	2.17642	1.89999	1.80287	2.07712	1.67089	-0.674338	2.20672	21.0686	4.43e-06	7.83e-05
ENSG00000096433	ITPR3	9.07406	9.12436	9.10543	8.43488	8.44553	8.43089	8.72567	8.7515	8.7474	-0.504158	8.78563	21.0465	4.48e-06	7.91e-05
ENSG00000041515	MYO16	2.32633	2.34926	2.26426	0.715535	1.04698	0.706327	1.40782	1.71479	1.60087	-1.0751	1.69683	21.0438	4.49e-06	7.92e-05
ENSG00000175224	ATG13	7.09382	7.03525	7.03731	6.70681	6.76035	6.64272	6.55688	6.57436	6.58574	-0.416045	6.79212	21.0072	4.58e-06	8.05e-05
ENSG00000289178	ENSG00000289178	-1.94493	-2.04608	-0.457851	-3.07442	-3.59974	-4.58787	-3.58431	-4.58787	-3.44437	-3.31532	-2.43088	21.001	4.59e-06	8.07e-05
ENSG00000226237	GAS1RR	2.86473	2.76135	2.75623	0.284349	-0.0870985	0.521393	1.64797	1.64446	1.7485	-1.67586	1.91567	20.9065	4.82e-06	8.47e-05
ENSG00000172493	AFF1	6.58042	6.63281	6.62345	5.78487	5.76281	5.80655	6.22982	6.20977	6.15866	-0.605718	6.23821	20.8967	4.85e-06	8.51e-05
ENSG00000146477	SLC22A3	4.63739	4.49468	4.47124	4.20308	4.11457	4.0054	3.84129	3.92337	3.91893	-0.530337	4.20553	20.8464	4.98e-06	8.7e-05
ENSG00000162482	AKR7A3	-0.616197	-0.315267	-0.152497	-1.87312	-1.28738	-1.49139	-1.77441	-1.75931	-1.09244	-1.28247	-1.02416	20.8222	5.04e-06	8.8e-05
ENSG00000163348	PYGO2	1.5679	1.80371	1.71411	1.11286	0.943395	0.900884	1.10561	0.846958	1.12334	-0.702588	1.2766	20.8183	5.05e-06	8.81e-05
ENSG00000225431	LINC01671	1.74734	1.18128	1.21137	0.591784	0.247104	0.653293	-0.188772	-0.352034	0.31998	-1.17115	0.74593	20.8058	5.08e-06	8.87e-05
ENSG00000145022	TCTA	5.2871	5.46612	5.41364	4.54447	4.46649	4.47532	4.96613	4.88182	4.97461	-0.656403	4.98847	20.7782	5.16e-06	8.98e-05
ENSG00000163521	GLB1L	3.51459	3.3688	3.46836	2.7758	2.78076	2.90711	3.04492	2.99425	2.9419	-0.543368	3.11431	20.7451	5.25e-06	9.11e-05
ENSG00000147162	OGT	7.9065	7.96391	7.93138	7.1443	7.20748	7.12408	7.56391	7.55215	7.51004	-0.570987	7.57964	20.7122	5.34e-06	9.26e-05
ENSG00000167513	CDT1	7.20848	7.18732	7.208	6.87576	6.81823	6.82162	6.78174	6.82919	6.81209	-0.378004	6.96064	20.6845	5.42e-06	9.37e-05
ENSG00000140854	KATNB1	5.81341	5.84552	5.90177	5.46283	5.38055	5.55932	5.20633	5.20257	5.32969	-0.491616	5.5457	20.655	5.5e-06	9.48e-05
ENSG00000227088	ENSG00000227088	0.689054	0.753738	0.932039	-0.0481458	-0.655959	-0.0525786	-0.493706	0.207176	-0.423702	-1.03598	0.207318	20.6425	5.54e-06	9.52e-05
ENSG00000198691	ABCA4	2.92398	3.17418	3.31509	1.64473	1.47611	1.16362	2.29571	2.52657	2.15907	-1.19926	2.46877	20.6223	5.59e-06	9.62e-05
ENSG00000115041	KCNIP3	-0.0622171	-0.935334	-0.0210679	-2.09286	-1.43911	-2.64959	-1.25953	-2.07815	-2.04273	-1.71986	-1.13563	20.5754	5.73e-06	9.84e-05
ENSG00000147459	DOCK5	7.22077	7.22726	7.23105	6.65585	6.71417	6.57512	6.87688	6.92177	6.81628	-0.461376	6.93581	20.5228	5.89e-06	0.000100857
ENSG00000137825	ITPKA	2.72416	2.81579	2.65176	2.27593	2.17642	2.05114	1.98903	1.66237	2.08406	-0.685699	2.31573	20.4516	6.12e-06	0.000104472
ENSG00000149577	SIDT2	4.73871	4.75256	4.88141	4.43169	4.37986	4.37788	4.21851	4.12247	4.22074	-0.496714	4.48114	20.3862	6.33e-06	0.0001079
ENSG00000166140	ZFYVE19	6.536	6.51088	6.36154	6.11252	6.05098	6.10242	5.88175	5.74192	5.78592	-0.517965	6.14769	20.3581	6.42e-06	0.000109421
ENSG00000092964	DPYSL2	6.77085	6.74496	6.80546	5.92653	5.92747	6.0114	6.42522	6.35689	6.31716	-0.598344	6.40393	20.3081	6.59e-06	0.000111895
ENSG00000293500	ENSG00000293500	-1.94493	-0.636535	-0.84568	-3.64117	-2.60571	-2.64959	-2.58253	-2.65541	-2.81458	-2.08149	-1.9495	20.2859	6.67e-06	0.000112904
ENSG00000304531	ENSG00000304531	-0.768703	-0.828709	-0.591371	-2.66857	-2.43645	-2.33187	-1.49412	-3.63254	-2.57963	-1.90366	-1.61377	20.2795	6.69e-06	0.000113213
ENSG00000266824	ENSG00000266824	0.286367	-0.0229708	-0.375243	-1.43675	-0.703213	-1.2036	-1.41162	-1.21072	-1.90053	-1.32855	-0.718089	20.253	6.78e-06	0.000114643
ENSG00000044446	PHKA2	6.60002	6.67136	6.71143	6.32765	6.22751	6.14106	6.27216	6.27778	6.29331	-0.404115	6.40533	20.2359	6.85e-06	0.000115595
ENSG00000175215	CTDSP2	8.47639	8.47554	8.49107	8.15135	8.16144	8.14723	7.95562	7.9876	7.95288	-0.418565	8.21587	20.2265	6.88e-06	0.000116019
ENSG00000260285	TRMT61A-DT	1.79346	1.46945	1.89142	0.698493	1.01814	1.07229	0.0628207	0.493886	0.828841	-1.01169	1.1448	20.215	6.92e-06	0.000116641
ENSG00000069011	PITX1	7.55556	7.61903	7.63128	7.29327	7.21525	7.27159	7.02542	7.11357	7.13546	-0.423607	7.3342	20.2136	6.93e-06	0.000116657
ENSG00000243566	UPK3B	-0.200029	-1.05047	-0.638772	-1.87312	-1.80092	-2.33187	-1.77441	-1.66698	-2.37764	-1.49066	-1.34508	20.2089	6.94e-06	0.000116867
ENSG00000239887	C1orf226	4.22274	4.2836	4.15937	3.26973	3.46787	3.21224	3.68132	3.5767	3.90447	-0.687821	3.80358	20.1537	7.15e-06	0.000119983
ENSG00000048649	RSF1	4.8715	4.87495	4.935	4.44452	4.47713	4.44183	4.48128	4.37139	4.55905	-0.431597	4.6217	20.1139	7.3e-06	0.000122354
ENSG00000105982	RNF32	1.44613	1.4902	1.23786	0.140335	0.389046	0.598234	0.396303	0.715907	0.908289	-0.872979	0.884735	20.0906	7.39e-06	0.000123771
ENSG00000204536	CCHCR1	2.84734	2.71804	2.7608	1.81253	2.12999	1.7053	2.34993	2.21697	2.04065	-0.722572	2.3393	20.0449	7.56e-06	0.000126682
ENSG00000001461	NIPAL3	4.53794	4.33898	4.57746	3.99376	3.94869	3.95881	4.0321	4.0529	4.10748	-0.472938	4.19146	20.04	7.58e-06	0.000126929
ENSG00000163357	DCST1	-0.522805	-0.636535	-0.415955	-1.5141	-2.7975	-1.95726	-2.12261	-2.33809	-1.25606	-1.54877	-1.29994	19.9379	8e-06	0.000133132
ENSG00000184611	KCNH7	-2.53559	-2.04608	-2.22969	-3.64117	-4.58787	-4.03001	-3.58431	-4.58787	-4.58787	-3.11203	-3.20282	19.9117	8.11e-06	0.000134803
ENSG00000178691	SUZ12	5.04739	5.07361	5.12259	4.62334	4.75465	4.6614	4.63477	4.68783	4.54669	-0.428923	4.81035	19.9012	8.16e-06	0.000135459
ENSG00000126432	PRDX5	8.71354	8.69052	8.65713	8.296	8.26251	8.32147	8.33559	8.34556	8.36525	-0.365848	8.45396	19.8769	8.26e-06	0.000137016
ENSG00000299845	ENSG00000299845	-1.20342	-1.05047	0.0993812	-2.09286	-2.28498	-2.33187	-1.99697	-2.07815	-2.37764	-1.78209	-1.45033	19.8699	8.29e-06	0.000137438
ENSG00000232233	LINC02043	1.37511	1.14248	1.36345	0.535316	0.655706	0.774137	0.301651	0.473745	0.230071	-0.801219	0.821789	19.8406	8.42e-06	0.000139306
ENSG00000139651	ZNF740	7.56987	7.53072	7.56009	7.2548	7.21723	7.19769	7.05564	7.00789	7.02923	-0.423224	7.28573	19.8404	8.42e-06	0.000139306
[truncated: 1,532 more rows]
